# Supplementary material for: Personalized peptide vaccine-induced immune response associated with long-term survival of a metastatic cholangiocarcinoma patient
Source: PubMed Central journal article supplement — J Hepatol. 2016 Oct;65(4):849–55. doi: 10.1016/j.jhep.2016.06.027 (PMC5756536; doi:10.1016/j.jhep.2016.06.027), 2016-10
Supplement: mmc1.pdf [file mmc1.pdf]

# **Personalized peptide vaccine induced immune response associated with long-term survival of a metastatic cholangiocarcinoma patient**

Markus W. Löffler, P. Anoop Chandran, Karoline Laske, Christopher Schroeder, Irina Bonzheim, Mathias Walzer, Franz J. Hilke, Nico Trautwein, Daniel J. Kowalewski, Heiko Schuster, Marc Günder, Viviana A. Carcamo Yañez, Christopher Mohr, Marc Sturm, Huu-Phuc Nguyen, Olaf Riess, Peter Bauer, Sven Nahnsen, Silvio Nadalin, Derek Zieker, Jörg Glatzle, Karolin Thiel, Nicole Schneiderhan-Marra, Stephan Clasen, Hans Bösmüller, Falko Fend, Oliver Kohlbacher, Cécile Gouttefangeas, Stefan Stevanović, Alfred Königsrainer, Hans-Georg Rammensee

## **Table of contents**

|                                                                                                                         |           |
|-------------------------------------------------------------------------------------------------------------------------|-----------|
| <b>Supplementary materials and methods .....</b>                                                                        | <b>3</b>  |
| <b>Supplementary Table 1: Antibodies used for Immunohistochemistry .....</b>                                            | <b>11</b> |
| <b>Supplementary Table 2: Auxiliary Results: Immunohistochemistry .....</b>                                             | <b>12</b> |
| <b>Supplementary Figure 1-15: Selected Radiological Imaging Results.....</b>                                            | <b>13</b> |
| <b>Supplementary Table 3: Layout of the somatic Cancer Panel (V2).....</b>                                              | <b>20</b> |
| <b>Supplementary Table 4: Overview of (potential) Tumor Suppressor (TSG) and Oncogenes (somatic Cancer Panel).....</b>  | <b>21</b> |
| <b>Supplementary Table 5: Quality Scores: somatic Cancer Panel.....</b>                                                 | <b>22</b> |
| <b>Supplementary Table 6: Overview of (potential) Tumor suppressor (TSG) and Oncogenes (WES).....</b>                   | <b>23</b> |
| <b>Supplementary Table 7: Quality Scores: Whole Exome Sequencing (WES) / Whole Transcriptome Sequencing (WTS) .....</b> | <b>24</b> |

|                                                                                                                                    |            |
|------------------------------------------------------------------------------------------------------------------------------------|------------|
| <b>Supplementary Table 8: WES/WTS/Deep Sequencing Results (L06/10) .....</b>                                                       | <b>25</b>  |
| <b>Supplementary Table 9: Epitope Prediction of mutated Ligands (L06/10)<br/>at first vaccination.....</b>                         | <b>29</b>  |
| <b>Supplementary Table 10: Epitope Prediction of mutated Ligands (L06/10)<br/>current.....</b>                                     | <b>33</b>  |
| <b>Supplementary Table 11: WES Results (L04/12) .....</b>                                                                          | <b>38</b>  |
| <b>Supplementary Table 12: Epitope Prediction of mutated Ligands (L04/12)<br/>at first vaccination.....</b>                        | <b>41</b>  |
| <b>Supplementary Table 13: Epitope Prediction of mutated Ligands (L04/12)<br/>current.....</b>                                     | <b>44</b>  |
| <b>Supplementary Table 14: WES/WTS Results (P03/13) .....</b>                                                                      | <b>48</b>  |
| <b>Supplementary Table 15: Epitope Prediction of mutated Ligand (P03/13)<br/>at first vaccination.....</b>                         | <b>51</b>  |
| <b>Supplementary Table 16: Epitope Prediction of mutated Ligands (P03/13)<br/>current.....</b>                                     | <b>53</b>  |
| <b>Supplementary Figure 16-21: Comparison mass spectra of immunopeptidome<br/>(L06/10) and respective synthetic peptides .....</b> | <b>55</b>  |
| <b>Supplementary Table 17: L06/10 Immunopeptidome (tumor tissue) .....</b>                                                         | <b>59</b>  |
| <b>Supplementary Table 18: Expression of source transcripts of vaccine<br/>peptides .....</b>                                      | <b>134</b> |
| <b>Supplementary Table 19: Epitope Prediction for vaccine peptides.....</b>                                                        | <b>135</b> |
| <b>Supplementary Table 20: Serum IL-10 concentrations during vaccination .</b>                                                     | <b>136</b> |
| <b>References .....</b>                                                                                                            | <b>137</b> |

## Supplementary materials and methods

### *Clinical Specimens*

Tumor (L06/10 [Primary tumor]; L03/11 [first in loco recurrence]; L04/12 [second in loco recurrence]; P03/13 [lung metastasis]) and benign tissue samples that were resected during surgery, underwent routine histopathology, and were cryopreserved for further analysis (except for L03/11 for the latter). Peripheral blood was drawn during each vaccination visit (see Figure 1). Further DNA from 18 ml of peripheral venous blood was isolated as a healthy tissue reference in April 2012.

### *Isolation and storage of PBMCs*

PBMCs were isolated from EDTA-blood within 6 h of blood drawing using standard density gradient centrifugation, by layering over Biocoll separating solution (Biochrom GmbH, Berlin, Germany). Cells were subsequently washed with PBS and counted using 0.1% Trypan blue solution.  $5-10 \times 10^6$  cells were frozen/ml of freezing solution (heat-inactivated FCS containing 10% DMSO) and stored in the gaseous phase of liquid nitrogen.

### *Pre-stimulation and expansion of PBMCs*

PBMCs were thawed (Day 0) and  $4-6 \times 10^6$  cells were seeded per well in a 24 well plate. Culture medium was Iscove's modified Dulbecco's medium (IMDM; Lonza, Basel, Switzerland) containing 10% heat-inactivated human AB serum (Life Technologies, Carlsbad, CA), 1% penicillin/streptomycin (PAA, Pasching, Austria), and  $50 \mu\text{M}$   $\beta$ -mercaptoethanol. For HLA class I peptide stimulations 5 ng/ml IL-4 (R&D, Minneapolis, MN) and 5 ng/ml IL-7 (Promokine, Heidelberg, Germany) were added. After overnight resting later (Day 1), cells were separately stimulated in triplicates (duplicates for pre-vaccination 'scr' time point), with peptide pool I\* (1  $\mu\text{g}/\text{ml}$  per

peptide) and peptide pool II\*\* (5 µg/ml per peptide). After each 48 h interval, recombinant human IL-2 (R&D) was replenished at a final concentration of 2 ng/ ml. On day 12 cells were harvested for functional testing. \*Pool I: RGS-5, ADFP2, ADFP3, MMP7-(1) and HIV-A03. \*\*Pool II: CCND1, IGFBP3, MMP7-(2), Filamin-A. HIV-A03 (KIRLRPGGK) and Filamin-A (ETVITVDTKAAGKGK) peptides were the negative control peptides for pool I and pool II respectively.

### *IFN-γ ELISPOT*

IFN-γ secretion by PBMCs in response to peptide re-stimulation was determined using ELISPOT assay, as described previously (1). Briefly, cells were re-stimulated using peptides (5 µg/ml peptides from pool I and 2.5 µg/ml peptides from pool II) in a 96 well ELISPOT plate (MSHAN4B50, Millipore, Darmstadt, Germany), which was pre-coated with anti-IFN-γ antibody (clone 1-D1K, Mabtech, Nacka Strand, Sweden). Phytohaemagglutinin-L (PHA-L) (for pool I stimulated cells) or Staphylococcus enterotoxin B (SEB) (for pool II stimulated cells) were used as a positive controls at 10 µg/ml or 1 µg/ml respectively. Cells stimulated with HIV-A03 peptide or Filamin A peptide served as the relevant negative controls. 26 h later, the secreted IFN-γ was detected using biotinylated anti-IFN-γ antibody (clone 7-B6-1, Mabtech), Extravidin-phosphatase enzyme and BCIP/NBT tablets (Sigma-Aldrich, Hamburg, Germany). Spots were scanned and counted with an ImmunoSpot Series 6 Core ELISPOT Reader (C.T.L. Europe, Bonn, Germany). Responses were considered positive if the average no. of spots minus the no. of spots in the negative control wells were at least 8 spots/100,000 seeded cells and 2 fold above the average spots in negative control wells.

### *HLA-peptide multimer staining*

Biotinylated MHC class I monomers containing vaccine peptides (RGS-5, ADFP2, ADFP3 and MMP7-(1)) were produced in-house using the conventional refolding technique (2, 3). Monomers were then co-incubated with streptavidin-PE or APC (Life-Technologies) to generate fluorescent HLA-peptide multimers (3). PBMCs were stained with HLA-peptide multimers adhering to the CIP–CIMT guidelines (3) (<http://www.cimt.eu/workgroups/cip/publications>). In short, PBMCs were incubated with HLA-peptide multimers (5 µg/ml), washed and then stained using a viability marker (Aqua Live Dead, Life Technologies), anti-CD4-FITC (clone HP2/6, in-house conjugated) and anti-CD8-PECy7 (clone SFCI21Thy2D3, Beckman Coulter, Krefeld, Germany). Cells were then acquired on a FACS Canto II (BD Biosciences) equipped with the DIVA software and analyzed using FlowJo 9.7.5 (Treestar, Ashland, USA). Responses were considered positive after vaccination if the percentage of living HLA-peptide multimer<sup>(+)</sup> CD8<sup>(+)</sup> cells were at least 2-fold above the percentages in the scr or 1V time point.

#### *Intra-cellular cytokine staining (ICS)*

TNF- $\alpha$  and IFN- $\gamma$  production was detected using ICS essentially as reported earlier (1). Briefly, cells were stimulated with individual peptides (10 µg/ml) in the presence of GolgiStop (BD Biosciences, Heidelberg, Germany) and Brefeldin A (Sigma-Aldrich, 10 µg/ml). Cells stimulated with HIV peptide or Filamin A peptide served as the relevant negative controls. After a 12 h stimulation period, cells were washed and stained with a viability marker (Aqua Live Dead; Life Technologies), CD4-APC-Cy7 and CD8-PE-Cy7 mAb (Beckman Coulter, Fullerton, CA) for 20 min at 4° C, fixed and permeabilized in Cytoperm/Cyto fix (BD Biosciences) for 20 min at 4° C and further stained with anti-IFN- $\gamma$ -FITC (BD Biosciences) and anti-TNF-Pacific-blue (Biolegend, San Diego, CA) for 30 min at 4° C. At least 200,000 CD4<sup>+</sup>/CD8<sup>+</sup> cells were acquired and analyzed.

Responses were considered positive if the percentage of cytokine producing cells were two-fold above the corresponding negative control peptide stimulated cells.

#### *Serum IL-10 assessment*

Serum samples were drawn at different vaccination time points (S-Monovette, Sarstedt, Nümbrecht, Germany). Blood samples were left for 4 hours at room temperature and centrifuged (5 min. at 4°C/ 1900 rpm). Serum was collected and centrifuged twice before freezing aliquots at -80°C until further use.

An in-house developed Luminex-based multiplexed sandwich immunoassay (Luminex, Austin, TX) was used to determine IL-10 levels in serum samples but detected sample values consistently ranged below the lower limit of quantification (LLoQ) of the assay.

Subsequently, an in-house developed ultra-sensitive IL-10 single molecule array (SIMOA) immunoassay was applied to determine serum IL-10 levels at different vaccination time points. The assay was validated, considering the recommendations for assay validation, put forward in respective guidelines from health authorities (e.g. European Medicine Agency (EMA), 2009; and Food and Drug Administration (FDA), 2013). The limit of detection (LoD) of the assay was found to be at  $0.44 \text{ fg}\cdot\text{mL}^{-1}$ , the limit of quantification (LoQ) at  $6.3 \text{ fg}\cdot\text{mL}^{-1}$  (not considering any sample dilution factor). Inter-assay precision (4 samples, different analyte levels; 7 runs) was 8.4 to 17.8 %CV [coefficient of variation], intra-assay precision (3 samples, different analyte levels; 20 replicates each) was 3.4 to 11.2 %CV.

Purified recombinant IL-10 protein was used as a calibrator for the SIMOA immunoassay. A different standard protein (ThermoFisher Scientific, Bremen, Germany, Order# SIL10) calibrated against the NIBSC/WHO (92/516) IL-10 standard was additionally evaluated with this in-house developed assay. The dose response

curve of this NIBSC/WHO calibrated standard paralleled the applied IL-10 standard curve. To convert sample values measured by the mentioned IL-10 SIMOA assay to respective WHO standard concentrations, the given analyte concentrations (as shown in supplementary Table 20) should be divided by a factor of 0.77.

#### *Exome- (WES) and Transcriptome- (WTS) sequencing*

As part of the *IndividualLIVER* project, whole exome sequencing (WES) was performed for L06/10 (tumor vs. liver) after exome enrichment using the SeqCap EZ Exome Enrichment Kit v2.0 (Roche NimbleGen, Mannheim, Germany), covering 44.1 megabases of coding sequence. For L06/10 and P03/13, combined WES (tumor vs. blood) and WTS (tumor) was done, which used the RNA Sample Preparation Kit v2 (illumina, Eindhoven, Netherlands). As part of a validation procedure for the first sequencing approach all somatic variants of the coding region found in the tumor sample L06/10 were validated by deep sequencing (average read depth 1330x) using an amplicon based approach (Haloplex custom panel; Agilent, Waldbronn, Germany). Only variants validated in the sample L06/10 by the deep sequencing approach were used for subsequent peptide prediction. All samples and venous blood were sequenced on a GAIIx (Illumina) as paired-end sequencing. Respective results are given below. This yielded a mean coverage depth of 90x for the tumor samples with 70 % of regions of interest covered with at least 30x and 58 % of the regions covered with at least 50x. On average 18 somatic variants were found, which is consistent with previous reports for CCC (4-7). Out of these somatic variants 7 were identified in 5 well known/potential tumor suppressor (TSG) or oncogenes.

#### *Bioinformatic analysis*

Adapters were trimmed using SeqPurge (manuscript under review, <https://github.com/marc-sturm/ngs-bits>), DNA-reads were mapped using BWA (v.

0.7.12, (8)) to hg19. Duplicates are marked by samblaster (v. 0.1.21, (9)). Overlapping reads were trimmed to reduce false-positive variants with very low allele-frequencies by an in-house tool. strelka (v. 1.0.14, (10)) was used for variant calling and SnpEff/SnpSift (v. 4.1c, (11, 12)), vcfliib (last accessed 06/23/2015, <https://github.com/ekg/vcfliib>) and dbNFSP (v. 3.0, (13)) were used for annotation. Custom filter criteria were used to extract high-confidence variants. Trimmed RNA-reads were mapped using STAR (v. 2.4.2a, (14)). Duplicates were removed by picard tools (v. 1.122, <http://broadinstitute.github.io/picard/>). QC parameters were collected by in-house scripts, all variants were annotated by in-house variant frequencies. Processing of amplicon-based deep-sequencing data ended after mapping.

### *Peptide prediction*

Both lists of tumor and patient specific (hg19 divergent) mutations were handled in machine-readable tab-separated format to keep a minimum of manual inspection possible. The variations start and stop positions were recorded with their chromosomal base position according to hg19. They were linked with the respective mRNA positions to keep track of all splicing variants of a gene. These transcript sequences were fetched from UCSC's GenomeBrowser Database (<https://genome.ucsc.edu/>). The tumor specific variations were then applied to this sequence with the possible combinations of patient specific variations on the transcript.

The possible combinations can be as follows:

- Tumor specific only or tumor specific with close homozygous patient specific variation, which results in a single variation sequence.
- Tumor specific variation with close heterozygous patient specific variation(s), which is fanned out according to the number of variations close.



- Interleaving insertions/deletions, which have to be processed in order of occurrence from 3' to 5' on the template strand.

Whether the tumor specific variation is heterozygous is irrelevant in this particular aspect as it is indeterminable if the heterozygous patient specific variation resides on the same allele as the tumor specific variation and both patient specific variation and regular genotype have to be considered with only the tumor specific since we are only interested in resulting peptides which are tumor specific.

From these combinations we derived the respective protein sequences with the translation of the mRNA in the according reading frame.

The binding prediction was then conducted in a sliding window fashion over the resulting protein sequences around the tumor-specific variations with SYFPEITHI and NetMHC (15, 16). The sequence slices were annotated each with their predicted binding score, the HLA allele for which the prediction is valid, and when available as with nucleotide exchange variations, with their wildtype counterpart and the respective score. Also connected were the chromosomal position of the mutation and the quality parameters of the sequencing experiments. This list was filtered for binding scores above the halfmax score of their respective HLA allele.

A fasta file was created from the protein sequences in addition to the predictions. This fasta file served as foundation of the individualized search database for LC-MS/MS validation via Spectra ID. From the filtered list also an inclusion list was created, which contained the respective mass-to-charge ratios for which a targeted search in the mass spectrometer could be conducted.

*Mass Spectrometry*

HLA-ligands were immunoprecipitated from cryopreserved tumor tissues and liver tissue (L06/10) as previously described (17) using the pan-HLA-class I antibody W6/32. Subsequently HLA-ligands were purified using 3 kDa cutoff centrifugal filters (Amicon, Merck Millipore, Carrigtwohill, Ireland), desalted (C18 ZipTip; Merck Millipore, Darmstadt, Germany) and concentrated (vacuum centrifuge; Bachofer, München, Germany). HLA-ligandomes were assessed by LC-MS/MS as previously described (18).

In short, samples were separated by reverse phase liquid chromatography on a 75 $\mu$ m trapping column and measured by an on-line coupled LTQ Orbitrap XL hybrid mass spectrometer (ThermoFisher Scientific, Bremen, Germany) by top 5 CID (collision induced dissociation) method. Raw data were processed against the human proteome ([www.uniprot.org](http://www.uniprot.org), as of 12/12/2012) as previously published (18) using MASCOT (v2.3.04 Matrix Science, Boston, MA) and Proteome Discoverer (v1.3 Thermo Fisher). Mass tolerance was set at 5ppm/ 0.5 Da for parent- and fragment masses respectively, filtering for Mascot Score < 20; search rank 1 and peptide lengths of 8-12 AA at a target false discovery rate (FDR)  $q \leq 5\%$  using an inverse decoy database search.

An individualized database in FASTA format was produced for potential patient specific alterations in protein sequences derived from cancer-specific variations in WES/WTS and searched against respective data.

## Supplementary Table 1: Antibodies used for Immunohistochemistry

Respective antibodies used for immunohistochemical stainings of diagnostic paraffin embedded sample material are listed with respective protein target, antibody clones used such as supplier and dilutions used for staining on an automated immunostainer following the manufacturer's protocol (Benchmark, Ventana Medical Systems, Tucson, AZ).

| <b>Antibody</b>   | <b>Clone</b> | <b>Supplier</b>                      | <b>Dilution</b> |
|-------------------|--------------|--------------------------------------|-----------------|
| <b>CCR7</b>       | clone Y59    | Abcam, Cambridge / UK                | 1:200           |
| <b>CD3</b>        | SP7          | DCS, Hamburg / Germany               | 1:100           |
| <b>CD4</b>        | SP 35        | Zytomed, Berlin / Germany            | 1:50            |
| <b>CD8</b>        | C8/144B      | DAKO, Glostrup / Denmark             | 1:150           |
| <b>CD25</b>       | 4C9          | Novocastra, Nussloch / Germany       | 1:100           |
| <b>CD45</b>       | mono mouse   | DAKO, Glostrup / Denmark             | 1:500           |
| <b>CK7</b>        | OV-TL12/30   | DAKO, Glostrup/ Denmark              | 1:100           |
| <b>CK20</b>       | Ks20.8       | DAKO, Glostrup / Denmark             | 1:200           |
| <b>CCND1</b>      | SP4          | DCS, Hamburg / Germany               | 1:40            |
| <b>EPCAM</b>      | VU-1D9       | Novocastra, Nussloch / Germany       | 1:50            |
| <b>FOXP3</b>      | mono mouse   | Abcam, Cambridge / UK                | 1:50            |
| <b>Granzyme B</b> | poly rabbit  | Roche, Mannheim / Germany            | ready to use    |
| <b>HLA DR</b>     | DR antigen   | DAKO, Glostrup / Denmark             | 1:150           |
| <b>HLA DQ</b>     | DQ antigen   | DAKO, Glostrup / Denmark             | 1:200           |
| <b>Napsin A</b>   | KCG1.1       | Zytomed, Berlin / Germany            | 1:50            |
| <b>MMP7</b>       | ID-2         | Merck-Millipore, Darmstadt / Germany | 1:150           |
| <b>Perforin</b>   | 5B10         | Novocastra, Nussloch / Germany       | 1:20            |
| <b>TTF1</b>       | 8G7G3/1      | Zytomed, Berlin / Germany            | 1:100           |

## Supplementary Table 2: Auxiliary Results: Immunohistochemistry

Counts per 10 high power fields (HPF) Stromal compartment

| Sample | CD3   | CD4  | CD8  | CD25 | FOX P3 | granzyme B | CD45 | HLA DR | HLA DQ |
|--------|-------|------|------|------|--------|------------|------|--------|--------|
| L06/10 | 45.1  | 8.9  | 9.3  | 9.8  | 0.5    | 0.3        | 44.8 | 48.0   | 48.0   |
| L03/11 | 16.5  | 4.2  | 3.3  | 32.8 | 2.4    | 1.1        | 7.6  | 13.3   | 16.6   |
| L04/12 | 78.0  | 59.7 | 36.2 | 18.4 | 5.2    | 1.5        | 67.2 | 122.5  | 95.0   |
| P03/13 | 119.3 | 47.7 | 24.5 | 21.2 | -      | 1.4        | 56.5 | 78.0   | 82.5   |

Counts per 10 high power fields (HPF) Epithelial compartment

| Sample | CD3 | CD4 | CD8 | CD25 | FOX P3 | granzyme B | CD45 | HLA DR | HLA DQ |
|--------|-----|-----|-----|------|--------|------------|------|--------|--------|
| L06/10 | 1.5 | 0.1 | 0.8 | 0.5  | 0.2    | 0.0        | 1.4  | 6.2    | 5.0    |
| L03/11 | 3.3 | 0.2 | 0.6 | 2.4  | 0.2    | 0.0        | 6.1  | 5.6    | 7.9    |
| L04/12 | 2.0 | 1.4 | 0.2 | 2.6  | 0.5    | 0.1        | 0.9  | 7.5    | 10.4   |
| P03/13 | 4.8 | 1.4 | 0.2 | 3.8  | -      | 0.1        | 0.3  | 35.5   | 29.5   |

## Supplementary Figure 1-15: Selected Radiological Imaging Results

*Selected Images: computed tomography (CT) / magnetic resonance imaging (MRI)/ 18Fluorodeoxyglucose positron emission tomography (18FDG PET) CT*

Diagnostic whole body CT scans/ MRI scans and 18FDG PET-CT scans were performed of the patient at various occasions during the course of disease. Here we show the pictures shown in Figure 1 for illustrative purposes in more detail, supplemented by further representative images that might be of interest.

*L06/10 (Primary tumor) CT scan before surgery (Supplementary Figure 1 (left)/ 2 (right))*

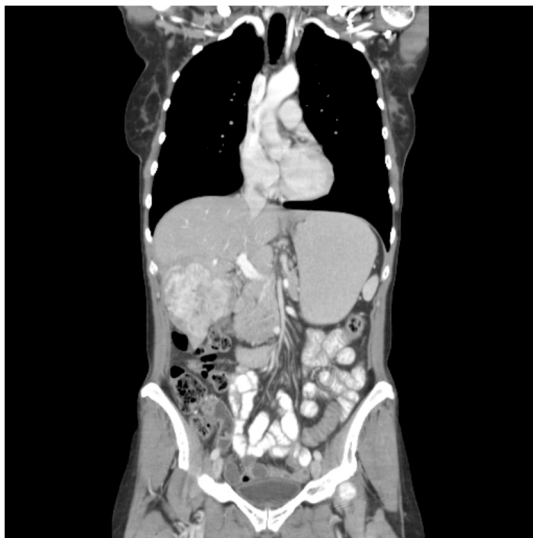

liver coronal (CT June/2010)

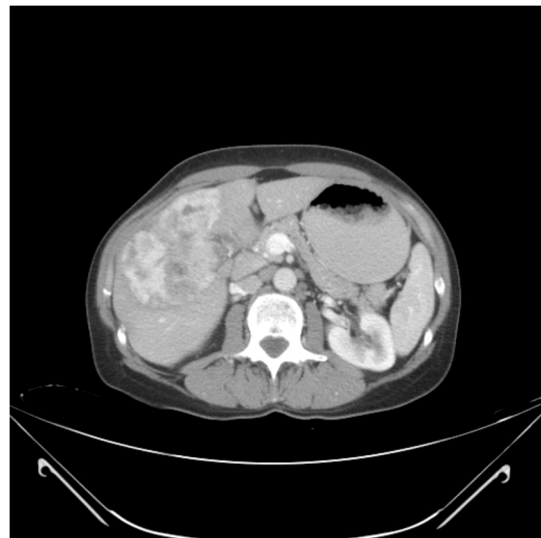

liver transversal (CT June/2010)

L06/10 (Primary tumor) CT scan after surgery (11/2010) (Supplementary Figure 3 (left)/ 4 (right))

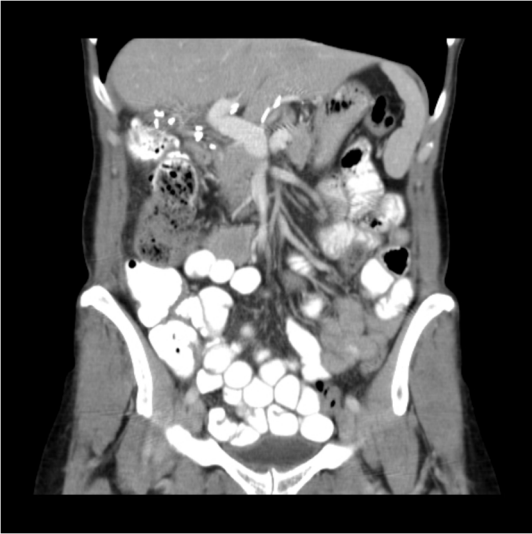

liver coronal (CT November /2010)

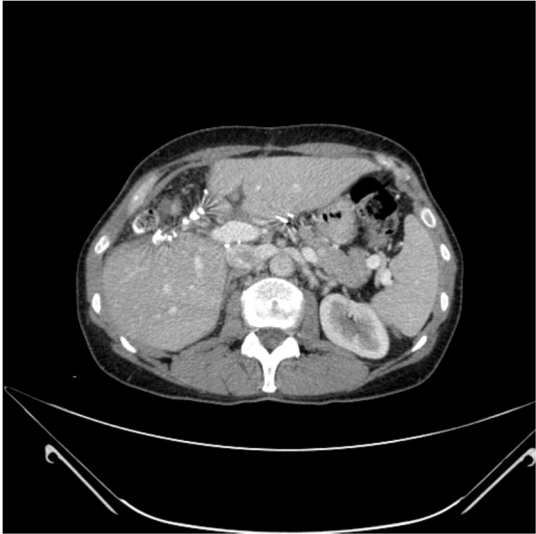

liver transversal (CT November/2010)

*L03/11 (first local recurrence) CT / MRI scan before surgery (Supplementary Figure 5 (left)/ 6 (right))*

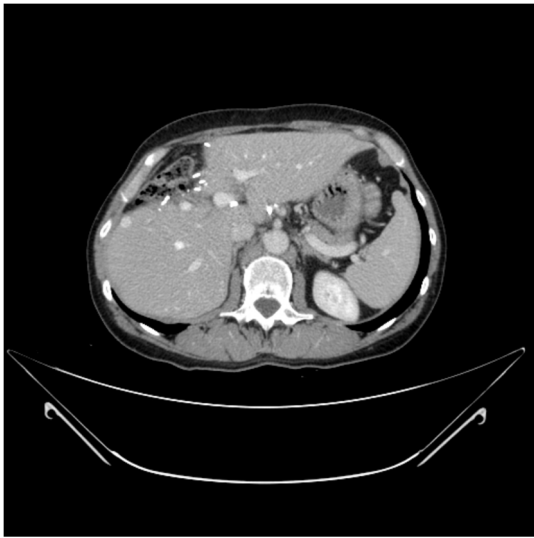

liver (segment 5) transversal (CT February/2011)

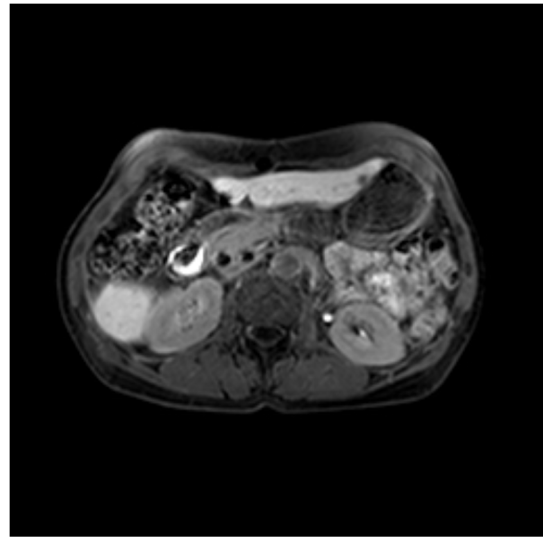

liver (segment 3) transversal (MRI February/2011)

*Supplementary Figure 7*

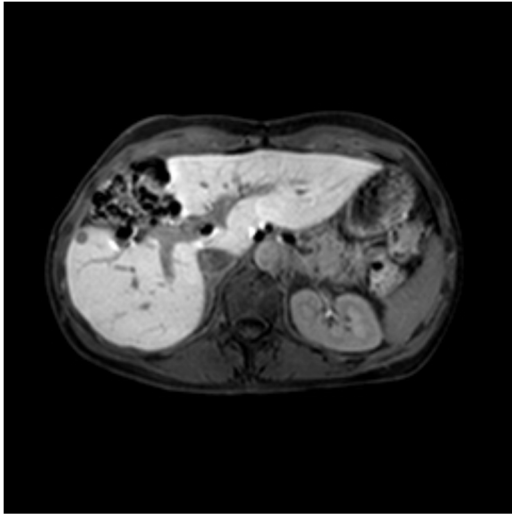

liver (segment 5) transversal (MRI February/2011)



*L04/12 (second local recurrence) CT scan after surgery (Supplementary Figure 8 (left)/ 9 (right))*

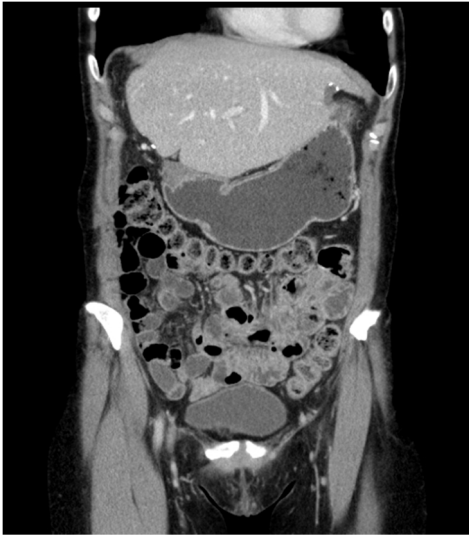

liver coronal (CT September/2012)

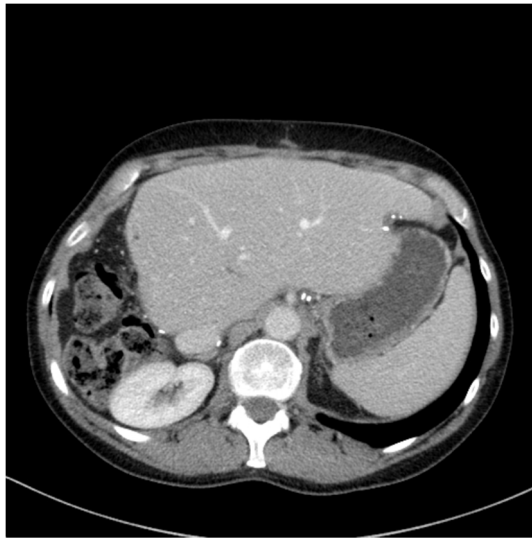

liver transversal (CT September/2012)

*Supplementary Figure 10*

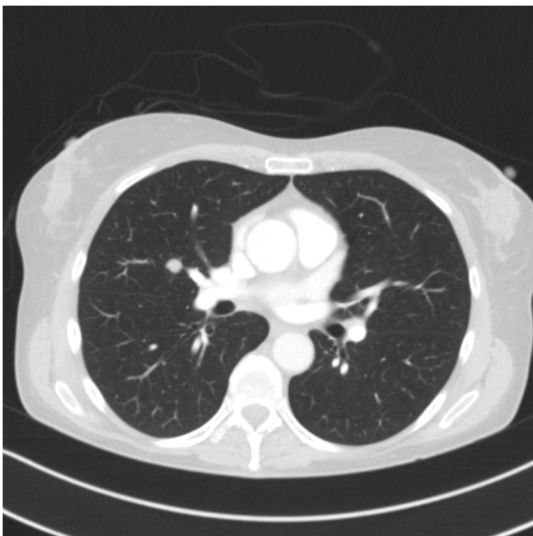

lung transversal (CT September/2012)

*P03/13 (pulmonal metastasis) CT /<sup>18</sup>FDG PET CT scan before surgery  
(Supplementary Figure 11 (left)/ 12 (right))*

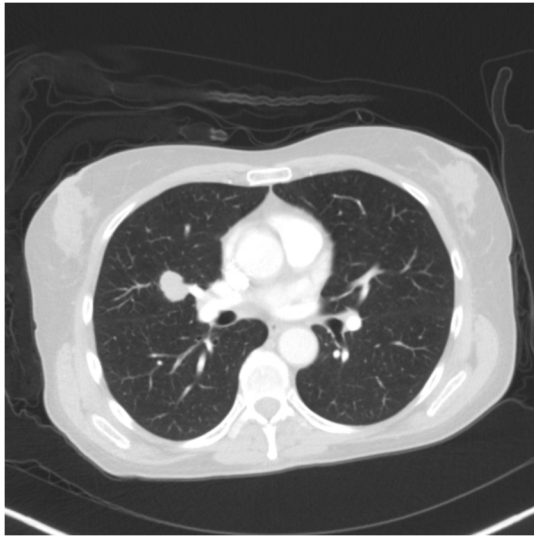

lung transversal (CT March/2013)

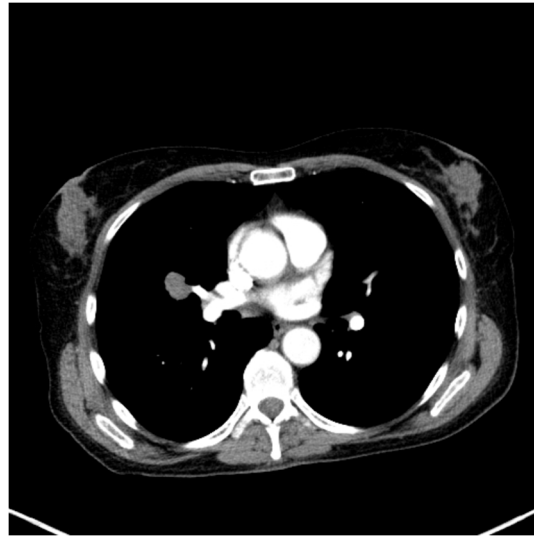

lung transversal (CT March/2013)

*Supplementary Figure 13*

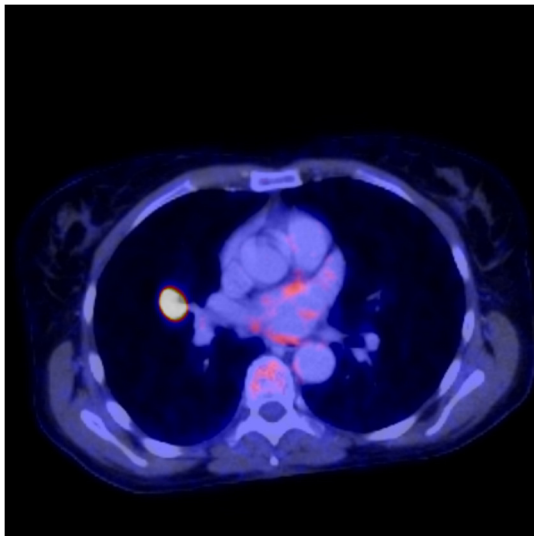

lung transversal (<sup>18</sup>FDG PET CT fusion March/2013)

*Follow up (Supplementary Figure 14 (left)/ 15 (right))*

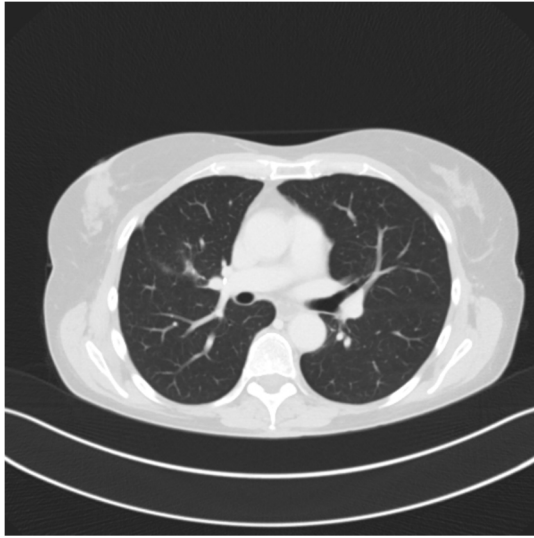

lung transversal (CT February/2015)

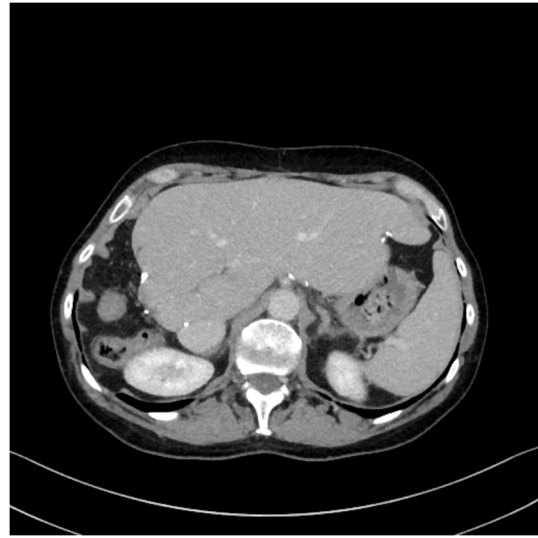

liver transversal (CT July/2015)

### Supplementary Table 3: Layout of the somatic Cancer Panel (V2)

The table lists all 336 genes included somatic cancer panel V2 (SureSelect XT; Agilent). The coding sequence of these genes was analyzed by NGS. Functional annotations (green: cell survival; blue: cell survival/ cell fate; yellow: cell fate; red: genome maintenance; orange: potential tumor suppressor or oncogene).

|        |         |         |         |         |          |         |
|--------|---------|---------|---------|---------|----------|---------|
| ABL1   | PDGFRA  | PTCH1   | ABCB1   | CSF3R   | HOXA3    | NAT2    |
| AKT1   | PIK3CA  | PAX5    | ABL2    | CYP2A6  | HSP90AA1 | NTRK3   |
| AKT3   | PIK3R1  | PHF6    | ACE     | CYP2B6  | IGF2R    | PAK3    |
| ALK    | RB1     | RUNX1   | ADH1A   | CYP2C8  | INSR     | PDGFRB  |
| BCL2   | RET     | SMARCA4 | ADH1B   | CYP2C9  | JAG1     | PGR     |
| BCL2A1 | PTPN11  | SMARCB1 | ADH1C   | CYP2E1  | JAG2     | PHLPP2  |
| BCL2L1 | PTEN    | SMO     | ADRB1   | CYP2J2  | KCNH2    | PRAM1   |
| BRAF   | SMAD2   | SOX2    | ADRB2   | CYP3A4  | KCNJ11   | PTCH2   |
| CARD11 | STK11   | WT1     | AHR     | DDR2    | LRP1B    | PTPRD   |
| CASP8  | TSC1    | SRSF2   | AKT2    | DICER1  | MAP2K2   | RAF1    |
| CBL    | TSC2    | TET2    | ALDH1A1 | DLL1    | GSTP1    | RGL1    |
| CCND1  | TGFB2   | ATM     | ALOX5   | DLL3    | IGF1R    | RGL2    |
| CCNE1  | TP53    | BAP1    | ARAF    | DOT1L   | IKBKE    | PIK3CG  |
| CDKN2A | VHL     | BRCA1   | ARFRP1  | DPYD    | IRS2     | PKHD1   |
| CDKN2B | SMAD4   | BRCA2   | ATR     | DRD2    | KDR      | PRKDC   |
| CEBPA  | TNFAIP3 | MDM2    | AURKA   | EPHA3   | LRP6     | PTGS2   |
| CRKL   | APC     | MLH1    | AURKB   | EPHA5   | LTK      | RARA    |
| CRLF2  | AR      | MSH2    | BCL2L2  | EPHA6   | GSTT1    | RICTOR  |
| FLT3   | ARID1A  | MSH6    | BCL6    | EPHB1   | IKZF1    | RPTOR   |
| FGFR2  | ASXL1   | GNAS    | BTK     | ERBB3   | JUN      | SALL4   |
| FGFR3  | CDH1    | DDX3X   | CCND2   | ERRFI1  | INHBA    | PLCG1   |
| GNAQ   | CTNNB1  | KMT2D   | CD38    | FANCA   | MDM4     | PMS2    |
| EGFR   | ERG     | MED1    | CD79A   | FLT1    | MRE11A   | PTGIS   |
| ERBB2  | FBXW7   | IRF6    | CD79B   | G6PD    | MS4A1    | SCN5A   |
| GNA11  | EZH2    | NRXN3   | CDH2    | DLL4    | MTHFR    | SLCO1B1 |
| KRAS   | FOXL2   | PIK3AP1 | CDH5    | EPHA7   | MYB      | SMAD3   |
| JAK3   | GATA1   | RIPK4   | CDH20   | EPHB4   | MYCN     | SOX10   |
| KIT    | DNMT3A  | RASA1   | CDK6    | ERCC2   | NR1H2    | TNKS    |
| MAP2K1 | IDH1    | RIMBP2  | CDKN2C  | FGFR1   | NTRK1    | TNKS2   |
| MAP2K4 | IDH2    | RIMS2   | CHEK2   | FGFR4   | MTOR     | VDR     |
| HRAS   | KDM6A   | RXFP3   | COMT    | FLT4    | MYCL1    | SRC     |
| JAK1   | MITF    | PCLO    | CUX1    | FOXP4   | NOTCH4   | SULT1A1 |
| JAK2   | MLL     | PRDM9   | CYP1A2  | EPHB6   | NQO1     | TOP1    |
| MCL1   | NOTCH1  | SYNE1   | CYP2C19 | F5      | NRXN2    | TPMT    |
| MYD88  | NOTCH2  | SYNE2   | CYP2D6  | ERBB4   | NT5C2    | TYMS    |
| NRAS   | MEN1    | SI      | CYP3A5  | ESR1    | NTRK2    | UGT1A1  |
| NPM1   | NF2     | TP63    | CCND3   | ESR2    | P2RY1    | USP9X   |
| MET    | NOTCH3  | TBX22   | CDK4    | GPR124  | P2RY12   | SLC19A1 |
| MPL    | NKX2-1  | VKORC1  | CDK8    | GUCY1A2 | MUC1     | STAT3   |
| NF1    | MYC     |         | CHEK1   | HMGCR   | MUTYH    | SUFU    |

**Supplementary Table 4: Overview of (potential) Tumor Suppressor (TSG) and Oncogenes (somatic Cancer Panel)**  
(somatic Cancer Panel V2, 336 genes)

| Genes                                                  | Variant Details  | L06/10<br>Primary<br>tumor | L03/11<br>1 <sup>st</sup> Liver<br>recurrence | L04/12<br>2 <sup>nd</sup> Liver<br>recurrence | P03/13<br>Pulmonary<br>metastasis | Classification                                      | Pathway                                                                  | Core Pathway                                                             | Process                                                   |
|--------------------------------------------------------|------------------|----------------------------|-----------------------------------------------|-----------------------------------------------|-----------------------------------|-----------------------------------------------------|--------------------------------------------------------------------------|--------------------------------------------------------------------------|-----------------------------------------------------------|
| <b>IDH1</b><br>NM_001282386.1<br>c.394C>T:p.Arg132Cys  | missense variant | +                          | +                                             | +                                             | +                                 | Oncogene <sup>(19)</sup>                            | chromatin<br>modification <sup>(19)</sup>                                | metabolism<br>(hypermethylation),<br>HIF1α stabilization <sup>(20)</sup> | cell fate <sup>(19)</sup><br>angiogenesis <sup>(20)</sup> |
| <b>PBRM1</b><br>NM_018313.4<br>c.2128C>T:p.Arg710*     | stop gain        | +                          | +                                             | +                                             | +                                 | TSG <sup>(19)</sup>                                 | chromatin<br>modification <sup>(19)</sup>                                | chromatin<br>SWI/SNF complex <sup>(21)</sup>                             | cell fate <sup>(19)</sup>                                 |
| <b>KMT2C</b><br>NM_170606.2<br>c.12545A>G:p.Asp4182Gly | missense variant | +                          | +                                             | +                                             | +                                 | TSG <sup>(19)</sup>                                 | chromatin<br>modification <sup>(19)</sup>                                | chromatin histone<br>methyltransferase <sup>(21)</sup>                   | Cell Fate <sup>(19)</sup>                                 |
| <b>PTGS2</b><br>NM_000963.3<br>c.G304T:p.V102L         | missense variant | +                          | -                                             | -                                             | +                                 | probably<br>oncogene                                | prostaglandine<br>synthesis                                              | N/A                                                                      | angiogenesis <sup>(22)</sup>                              |
| <b>NOTCH2</b><br>NM_024408.3<br>c.3416T>G:p.Leu1139Arg | missense variant | -                          | +                                             | -                                             | -                                 | TSG <sup>(23)</sup>                                 | notch-signaling <sup>(21,<br/>24)</sup>                                  | NOTCH <sup>(19, 25, 26)</sup>                                            | cell fate <sup>(19)</sup>                                 |
| <b>PIK3R1</b><br>NM_181523.2<br>c.1453G>T:p.Glu485*    | stop gain        | -                          | +                                             | -                                             | -                                 | TSG <sup>(27)</sup>                                 | PI3K-signaling <sup>(28, 29)</sup>                                       | PI3K <sup>(19, 30)</sup>                                                 | cell survival <sup>(19)</sup>                             |
| <b>PTPN11</b><br>NM_002834.3<br>c.1492C>T:p.Arg498Trp  | missense variant | -                          | -                                             | -                                             | +                                 | oncogene <sup>(19, 31)</sup><br>TSG <sup>(32)</sup> | RAS/MAPK sig. <sup>(31,<br/>33)</sup><br>PI3K pathway <sup>(34-36)</sup> | RAS <sup>(19, 21)</sup>                                                  | cell Survival <sup>(19,<br/>37, 38)</sup>                 |

**Supplementary Table 5: Quality Scores: somatic Cancer Panel**

|                                     | <b>L06/10<br/>Primary<br/>Tumor</b> | <b>L03/11<br/>1<sup>st</sup> Liver<br/>recurrence</b> | <b>L04/12<br/>2<sup>nd</sup> Liver<br/>recurrence</b> | <b>P03/13<br/>Pulmonary<br/>metastasis</b> | <b>Mean of all<br/>Tumor samples</b> | <b>Blood sample<br/>normal tissue<br/>reference</b> |
|-------------------------------------|-------------------------------------|-------------------------------------------------------|-------------------------------------------------------|--------------------------------------------|--------------------------------------|-----------------------------------------------------|
| <b>Read count</b>                   | 36,259,368                          | 43,976,922                                            | 40,203,930                                            | 39,160,748                                 | 39,900,242                           | 17,748,620                                          |
| <b>Q30 percentage</b>               | 85.78                               | 85.43                                                 | 85.15                                                 | 85.1                                       | 85.37                                | 85.24                                               |
| <b>Read length</b>                  | 150                                 | 150                                                   | 150                                                   | 150                                        | 150                                  | 150                                                 |
| <b>Insert size</b>                  | 160.63                              | 154.37                                                | 158.21                                                | 158.73                                     | 157.99                               | 177.82                                              |
| <b>Target region read<br/>depth</b> | 979.48                              | 1172.31                                               | 1058.96                                               | 1051.85                                    | 1065.65                              | 705,25                                              |
| <b>Target region 100X<br/>[%]</b>   | 97.71                               | 97.95                                                 | 97.96                                                 | 97.72                                      | 97.84                                | 98.25                                               |
| <b>Target region 500X<br/>[%]</b>   | 87.61                               | 93.09                                                 | 90.78                                                 | 89.85                                      | 90.33                                | 76.27                                               |
| <b>Duplicate read [%]</b>           | 34.24                               | 36.78                                                 | 37.31                                                 | 32.24                                      | 35.14                                | 16.01                                               |
| <b>On-target read [%]</b>           | 59.47                               | 61.31                                                 | 62.25                                                 | 58.54                                      | 60.39                                | 60.28                                               |

### Supplementary Table 6: Overview of (potential) Tumor suppressor (TSG) and Oncogenes (WES)

(Analyzed by whole exome sequencing (WES) as described under Supplementary Materials and Methods above)

| Gene                                                   | Variant Details | L06/10<br>Primary<br>Tumor | L04/12<br>2 <sup>nd</sup> Liver<br>recurrence | P03/13<br>Pulmonary<br>metastasis | Classification                      | Pathway                                   | Process                                                   | Core pathway                                                                   |
|--------------------------------------------------------|-----------------|----------------------------|-----------------------------------------------|-----------------------------------|-------------------------------------|-------------------------------------------|-----------------------------------------------------------|--------------------------------------------------------------------------------|
| <b>PTGS2</b><br>NM_000963<br>c.G304T:p.V102L           | nonsyn. SNV     | +                          | -                                             | -                                 | probable<br>oncogene                | prostaglandine<br>synthesis               | angiogenesis <sup>(22)</sup>                              | n.a.                                                                           |
| <b>IDH1</b><br>NM_005896<br>c.C394T:p.R132C            | nonsyn. SNV     | +                          | -                                             | +                                 | oncogene <sup>(19)</sup>            | chromatin<br>modification                 | cell fate <sup>(19)</sup><br>angiogenesis <sup>(20)</sup> | metabolism<br>(hypermethylation),<br>HIF-1 $\alpha$ stabilized <sup>(20)</sup> |
| <b>PBRM1</b><br>NM_018313<br>c.C2128T:p.R710X          | stopgain SNV    | +                          | -                                             | -                                 | TSG <sup>(19)</sup>                 | chromatin<br>modification <sup>(19)</sup> | cell fate <sup>(19)</sup>                                 | chromatin SWI/SNF<br>complex <sup>(21)</sup>                                   |
| <b>KMT2C</b><br>NM_170606<br>c.A12545G:p.D4182G        | nonsyn. SNV     | +                          | +                                             | -                                 | TSG <sup>(19)</sup>                 | chromatin<br>modification <sup>(19)</sup> | cell fate <sup>(19)</sup>                                 | chromatin histone<br>methyltransferase <sup>(21)</sup>                         |
| <b>KDM6B</b><br>NM_001080424.1<br>c.740C>T:p.Pro247Leu | nonsyn. SNV     | -                          | +                                             | -                                 | probable<br>TSG <sup>(39, 40)</sup> | chromatin<br>modification <sup>(41)</sup> | cell fate <sup>(41)</sup>                                 | histone<br>demethylase <sup>(41)</sup>                                         |

**Supplementary Table 7: Quality Scores: Whole Exome Sequencing (WES) / Whole Transcriptome Sequencing (WTS)**

|                                     | <b>WES<br/>L06/10<br/>Primary Tumor</b> | <b>WES<br/>L04/12<br/>2<sup>nd</sup> Liver<br/>recurrence</b> | <b>WES<br/>P03/13<br/>Pulmonary<br/>metastasis</b> | <b>WES<br/>Mean of all<br/>Tumor samples</b> | <b>WES<br/>Normal<br/>Blood<br/>(reference)</b> | <b>WTS<br/>L06/10<br/>Primary Tumor</b> | <b>WTS<br/>P03/13<br/>Lung metastasis</b> |
|-------------------------------------|-----------------------------------------|---------------------------------------------------------------|----------------------------------------------------|----------------------------------------------|-------------------------------------------------|-----------------------------------------|-------------------------------------------|
| <b>Read count</b>                   | 75,849,162                              | 113,219,318                                                   | 87,341,796                                         | 92,136,758.67                                | 114,787,500                                     | 108,623,056                             | 78,955,014                                |
| <b>Q30 percentage</b>               | 73.11                                   | 89.88                                                         | 92.44                                              | 85.14                                        | 90.93                                           | 88.45                                   | 90.06                                     |
| <b>Read length</b>                  | 151                                     | 76                                                            | 76                                                 | 101.00                                       | 76                                              | 76                                      | 76                                        |
| <b>Insert size</b>                  | 256.80                                  | 104.57                                                        | 114.76                                             | 158.71                                       | 104.30                                          | -                                       | -                                         |
| <b>Target region read<br/>depth</b> | 107.56                                  | 85.74                                                         | 76.11                                              | 89.80                                        | 105.90                                          | -                                       | -                                         |
| <b>Target region 10x [%]</b>        | 72.34                                   | 91.99                                                         | 85.90                                              | 83.41                                        | 92.96                                           | -                                       | -                                         |
| <b>Target region 50x [%]</b>        | 58.53                                   | 61.70                                                         | 52.84                                              | 57.69                                        | 69.02                                           | -                                       | -                                         |
| <b>Duplicate read [%]</b>           | 7.18                                    | 26.56                                                         | 20.96                                              | 18.23                                        | 12.31                                           | 30.10                                   | 21.41                                     |
| <b>On-target read [%]</b>           | 72.34                                   | 74.52                                                         | 79.58                                              | 75.48                                        | 74.90                                           | -                                       | -                                         |



### Supplementary Table 8: WES/WTS/Deep Sequencing Results (L06/10)

Shown are sequencing results obtained by WES (whole exome sequencing) and WTS (whole transcriptome sequencing) and deep sequencing of altered regions evidenced in WES (for validation) of lesion L06/10 (primary tumor), yielding basic somatic variants. Complex variants are excluded as being unsuitable for the subsequent prediction of HLA-ligands. In sequential order of columns from left to right: serial number; chromosome number; start and end position of somatic variant, ref.: reference base; obs.: observed base at respective chromosomal location; allele frequency and depth of somatic variant as sequenced by WES in tumor and reference tissue (normal); frequency and depth of somatic variant as sequenced by WTS in tumor material; frequency and depth of somatic variant as sequenced by deep sequencing in tumor and reference tissue (normal); Ref. Seq. (NCBI Reference Sequence) such as variant type (MV: missense variant; DV: downstream gene variant; SG: stop gain variant; UV: upstream gene variant; SV: splice region variant) and putative AA (amino acid) alteration introduced by somatic variant; n.d. no data; <sup>±</sup> variant excluded for peptide prediction.

| # | #chr | start     | end       | gene                                            | ref. | obs. | WES          |       |              |       | WTS   |       | deep sequencing |       |        |       | Ref. Seq.<br>variant type<br>[AA alteration]                                                 |
|---|------|-----------|-----------|-------------------------------------------------|------|------|--------------|-------|--------------|-------|-------|-------|-----------------|-------|--------|-------|----------------------------------------------------------------------------------------------|
|   |      |           |           |                                                 |      |      | tumor        |       | normal       |       | tumor |       | tumor           |       | normal |       |                                                                                              |
|   |      |           |           |                                                 |      |      | allele freq. | depth | allele freq. | depth | freq. | depth | freq.           | depth | freq.  | depth |                                                                                              |
| 1 | chr1 | 153633713 | 153633713 | <i>SNAPIN<sup>a</sup>,<br/>ILF2<sup>b</sup></i> | A    | G    | 0.12         | 186   | 0.00         | 84    | 0.04  | 203   | 0.09            | 2064  | 0.00   | 1378  | <sup>a</sup> NM_012437.5<br>MV [Q116G]<br><sup>b</sup> NM_004515.3<br>DV [n.d.] <sup>±</sup> |

| # | #chr | start     | end       | gene                                                                    | ref. | obs. | WES             |       |                 |       | WTS   |       | deep sequencing |       |        |       | Ref. Seq.<br>variant type<br>[AA alteration]                                                                                                                                          |
|---|------|-----------|-----------|-------------------------------------------------------------------------|------|------|-----------------|-------|-----------------|-------|-------|-------|-----------------|-------|--------|-------|---------------------------------------------------------------------------------------------------------------------------------------------------------------------------------------|
|   |      |           |           |                                                                         |      |      | tumor           |       | normal          |       | tumor |       | tumor           |       | normal |       |                                                                                                                                                                                       |
|   |      |           |           |                                                                         |      |      | allele<br>freq. | depth | allele<br>freq. | depth | freq. | depth | freq.           | depth | freq.  | depth |                                                                                                                                                                                       |
|   |      |           |           |                                                                         |      |      |                 |       |                 |       |       |       |                 |       |        |       | <sup>b</sup> NM_001267809.1<br>DV [n.d.] <sup>±</sup>                                                                                                                                 |
| 2 | chr1 | 186648199 | 186648199 | <i>PTGS2</i>                                                            | C    | A    | 0.16            | 125   | 0.00            | 22    | 0.00  | 32    | 0.11            | 1679  | 0.00   | 815   | NM_000963.3<br>MV [V102L]                                                                                                                                                             |
| 3 | chr2 | 179989221 | 179989221 | <i>SESTD1</i>                                                           | T    | A    | 0.22            | 161   | 0.00            | 99    | 0.16  | 44    | 0.23            | 3842  | 0.00   | 2402  | NM_178123.4<br>MV [E346V]                                                                                                                                                             |
| 4 | chr2 | 209113113 | 209113113 | <i>IDH1</i>                                                             | G    | A    | 0.23            | 229   | 0.00            | 33    | 0.10  | 622   | 0.27            | 2027  | 0.00   | 1257  | NM_001282386.1;<br>NM_001282387.1;<br>NM_005896.3<br>MV [R132C]                                                                                                                       |
| 5 | chr3 | 52643768  | 52643768  | <i>PBRM1</i>                                                            | G    | A    | 0.18            | 146   | 0.00            | 55    | 0.10  | 31    | 0.15            | 936   | 0.00   | 641   | NM_018313.4<br>SG [R710*] <sup>±</sup>                                                                                                                                                |
| 6 | chr4 | 24578282  | 24578282  | <i>DHX15</i>                                                            | G    | C    | 0.14            | 177   | 0.00            | 45    | 0.10  | 194   | 0.13            | 784   | 0.00   | 602   | NM_001358.2<br>MV [R31G]                                                                                                                                                              |
| 7 | chr5 | 176011599 | 176011599 | <i>CDHR2</i>                                                            | G    | A    | 0.06            | 105   | 0.00            | 31    | 0.00  | 53    | 0.06            | 2044  | 0.00   | 1598  | NM_001171976.1;<br>NM_017675.4<br>MV [V773I]                                                                                                                                          |
| 8 | chr6 | 155581528 | 155581528 | <i>TFB1M<sup>a</sup>,<br/>CLDN20<sup>b</sup>,<br/>TIAM2<sup>c</sup></i> | C    | T    | 0.16            | 160   | 0.00            | 115   | 0.00  | 36    | 0.17            | 1024  | 0.00   | 759   | <sup>a</sup> NM_016020.3<br>MV [V225M]<br><sup>b</sup> NM_001001346.3<br>UV [n.d.] <sup>±</sup><br><sup>c</sup> NM_012454.3;<br><sup>c</sup> NM_001010927.2<br>DV [n.d.] <sup>±</sup> |
| 9 | chr7 | 5662641   | 5662641   | <i>RNF216</i>                                                           | G    | T    | 0.14            | 118   | 0.00            | 109   | 0.00  | 45    | 0.09            | 376   | 0.00   | 271   | NM_207111.3;<br>NM_207116.2<br>MV [N817K]                                                                                                                                             |

| #  | #chr  | start     | end       | gene                                           | ref. | obs. | WES             |       |                 |       | WTS   |       | deep sequencing |       |        |       | Ref. Seq.<br>variant type<br>[AA alteration]                                                                                                                                                               |
|----|-------|-----------|-----------|------------------------------------------------|------|------|-----------------|-------|-----------------|-------|-------|-------|-----------------|-------|--------|-------|------------------------------------------------------------------------------------------------------------------------------------------------------------------------------------------------------------|
|    |       |           |           |                                                |      |      | tumor           |       | normal          |       | tumor |       | tumor           |       | normal |       |                                                                                                                                                                                                            |
|    |       |           |           |                                                |      |      | allele<br>freq. | depth | allele<br>freq. | depth | freq. | depth | freq.           | depth | freq.  | depth |                                                                                                                                                                                                            |
| 10 | chr7  | 84671487  | 84671487  | <i>SEMA3D</i>                                  | G    | A    | 0.10            | 297   | 0.00            | 66    | 0.00  | 9     | 0.14            | 447   | 0.00   | 252   | NM_152754.2<br>SG [Q326*] <sup>±</sup>                                                                                                                                                                     |
| 11 | chr7  | 127669812 | 127669812 | <i>LRRCA<sup>a</sup>,<br/>SND1<sup>b</sup></i> | C    | G    | 0.12            | 485   | 0.00            | 47    | 0.00  | 6     | 0.12            | 4338  | 0.00   | 2558  | <sup>a</sup> NM_022143.4<br>MV [E294D]<br><sup>b</sup> SND1<br><sup>b</sup> NM_014390.2<br>IV [n.d.] <sup>±</sup>                                                                                          |
| 12 | chr7  | 151848648 | 151848648 | <i>KMT2C</i>                                   | T    | C    | 0.16            | 136   | 0.00            | 49    | 0.00  | 42    | 0.14            | 1730  | 0.00   | 1007  | NM_170606.2<br>MV [D4182G]                                                                                                                                                                                 |
| 13 | chr10 | 6067959   | 6067959   | <i>IL2RA</i>                                   | G    | A    | 0.10            | 276   | 0.00            | 249   | 0.00  | 14    | 0.14            | 1711  | 0.00   | 1210  | NM_000417.2<br>MV [P32S]                                                                                                                                                                                   |
| 14 | chr10 | 93668078  | 93668078  | <i>FGFBP3</i>                                  | C    | T    | 0.20            | 75    | 0.00            | 166   | 0.00  | 8     | 0.06            | 2125  | 0.00   | 1625  | NM_152429.4<br>MV [E217K]                                                                                                                                                                                  |
| 15 | chr10 | 131665491 | 131665491 | <i>EBF3</i>                                    | C    | T    | 0.09            | 169   | 0.00            | 144   | 0.00  | 2     | 0.13            | 2878  | 0.00   | 1653  | NM_001005463.2<br>MV [R309K]                                                                                                                                                                               |
| 16 | chr14 | 20854241  | 20854241  | <i>TEP1</i>                                    | A    | G    | 0.28            | 129   | 0.00            | 74    | 0.07  | 14    | 0.27            | 2336  | 0.00   | 1632  | NM_007110.4<br>MV [F992S]                                                                                                                                                                                  |
| 17 | chr14 | 91636435  | 91636435  | <i>C14orf159</i>                               | G    | A    | 0.34            | 61    | 0.00            | 106   | 0.31  | 35    | 0.36            | 2538  | 0.00   | 2575  | NM_001102368.2;<br>NM_001102366.2;<br>NM_001102369.2;<br>NM_001286470.1;<br>NM_001286472.1;<br>NM_024952.7;<br>NM_001102367.2;<br>NM_001286471.1<br>MV [D116N]<br>NM_001286473.1<br>DV [n.d.] <sup>±</sup> |

| #  | #chr  | start    | end      | gene                                              | ref. | obs. | WES             |       |                 |       | WTS   |       | deep sequencing |       |        |       | Ref. Seq.<br>variant type<br>[AA alteration]                                                                                 |
|----|-------|----------|----------|---------------------------------------------------|------|------|-----------------|-------|-----------------|-------|-------|-------|-----------------|-------|--------|-------|------------------------------------------------------------------------------------------------------------------------------|
|    |       |          |          |                                                   |      |      | tumor           |       | normal          |       | tumor |       | tumor           |       | normal |       |                                                                                                                              |
|    |       |          |          |                                                   |      |      | allele<br>freq. | depth | allele<br>freq. | depth | freq. | depth | freq.           | depth | freq.  | depth |                                                                                                                              |
| 18 | chr15 | 45440569 | 45440569 | <i>DUOX1</i>                                      | A    | C    | 0.11            | 214   | 0.00            | 156   | 0.00  | 10    | 0.13            | 3081  | 0.00   | 1724  | NM_017434.4;<br>NM_175940.2<br>MV [E914D]                                                                                    |
| 19 | chr17 | 3101176  | 3101176  | <i>OR1A2</i>                                      | C    | T    | 0.39            | 277   | 0.00            | 158   | n/a   | 0     | 0.35            | 1838  | 0.00   | 1397  | NM_012352.1<br>SG [R122*] <sup>±</sup>                                                                                       |
| 20 | chr17 | 74005271 | 74005271 | <i>EVPL<sup>a</sup>,<br/>CDK3<sup>b</sup></i>     | C    | A    | 0.23            | 26    | 0.00            | 28    | n/a   | 0     | 0.32            | 3560  | 0.00   | 2705  | <sup>a</sup> NM_001988.2<br>SG [E1339*] <sup>±</sup><br><sup>b</sup> NM_001258.2<br>DV [n.d.] <sup>±</sup>                   |
| 21 | chr22 | 17072027 | 17072027 | <i>CCT8L2</i>                                     | G    | T    | 0.09            | 205   | 0.00            | 86    | n/a   | 0     | 0.16            | 862   | 0.00   | 676   | NM_014406.4<br>MV [Q472K]                                                                                                    |
| 22 | chrX  | 21674105 | 21674105 | <i>KLHL34<sup>a</sup>,<br/>CNKSR2<sup>b</sup></i> | C    | T    | 0.22            | 89    | 0.00            | 65    | n/a   | 0     | 0.32            | 981   | 0.00   | 652   | <sup>a</sup> NM_153270.1<br>MV [R601H]<br><sup>b</sup> NM_014927.3;<br><sup>b</sup> NM_001168647.1<br>DV [n.d.] <sup>±</sup> |
| 23 | chrX  | 27998815 | 27998815 | <i>DCAF8L1</i>                                    | T    | A    | 0.14            | 99    | 0.00            | 63    | n/a   | 0     | 0.07            | 2357  | 0.00   | 1619  | NM_001017930.1<br>MV [S213C]                                                                                                 |
| 24 | chrX  | 48661274 | 48661274 | <i>HDAC6</i>                                      | A    | G    | 0.15            | 72    | 0.00            | 46    | 0.00  | 5     | 0.13            | 1973  | 0.00   | 1073  | NM_006044.2<br>SV [n.d.] <sup>±</sup>                                                                                        |
| 25 | chrX  | 70467293 | 70467293 | <i>ZMYM3</i>                                      | A    | G    | 0.13            | 134   | 0.00            | 68    | 0.00  | 12    | 0.13            | 3349  | 0.00   | 2348  | NM_005096.3;<br>NM_201599.2;<br>NM_001171162.1<br>MV [I739T]<br>NM_001171163.1<br>DV [n.d.] <sup>±</sup>                     |

### Supplementary Table 9: Epitope Prediction of mutated Ligands (L06/10) at first vaccination

Shown are *in silico* predicted HLA class I peptide ligands (amino acid alterations in peptide sequences are underlined) based on mutations provided in **Suppl. Table 8**. Predictions encompass 9-12mer peptides and have been predicted using dedicated software available before September 2012 previous to starting vaccinations. Further information regarding bioinformatics analyses is given under **Suppl. Material and Methods**. Scoring of putative HLA binding peptides according to the used software algorithms together with predicted HLA alleles matching the patient given in nM for NetMHCpan 2.4 (42, 43) and NetMHC 3.0 (44-46) respectively or % of maximal binding (50% max.) for SYFPEITHI (16). Respective cut offs were predefined at <500nM for NetMHCpan 2.4 and NetMHC 3.0 or >50%max. for SYFPEITHI. As matrices for HLA allele B\*07:05 were not always available closely related HLA allele B\*07:02 was additionally used when available. Further gene identifiers (Gene ID) according to the National Center for Biotechnology Information (NCBI) are listed.

| # | Peptide Sequence   | mer | Method        | Score  | HLA     | Gene ID       |
|---|--------------------|-----|---------------|--------|---------|---------------|
| 1 | E <u>I</u> SHATFK  | 8   | netMHC 3.0    | 256 nM | A*03:01 | <i>IL2RA</i>  |
| 2 | H <u>S</u> HWAAQQY | 8   | netMHCpan 2.4 | 278 nM | A*29:01 | <i>TEP1</i>   |
|   |                    |     | netMHC 3.0    | 323 nM | B*35:01 |               |
| 3 | IIIG <u>C</u> HAY  | 8   | netMHCpan 2.4 | 17 nM  | A*29:01 | <i>IDH1</i>   |
|   |                    |     | netMHCpan 2.4 | 119 nM | B*35:01 |               |
|   |                    |     | netMHC 3.0    | 198 nM | B*35:01 |               |
| 4 | KAALVP <u>N</u> K  | 8   | netMHC 3.0    | 114 nM | A*03:01 | <i>FGFBP3</i> |
|   |                    |     | netMHCpan 2.4 | 285 nM | A*03:01 |               |
| 5 | LPDHP <u>H</u> SH  | 8   | netMHCpan 2.4 | 488 nM | B*35:01 | <i>TEP1</i>   |
| 6 | MSY <u>L</u> LTSR  | 8   | netMHC 3.0    | 55 nM  | A*03:01 | <i>PTGS2</i>  |
|   |                    |     | netMHCpan 2.4 | 280 nM |         |               |
| 7 | QP <u>I</u> FNLTV  | 8   | netMHCpan 2.4 | 306 nM | B*35:01 | <i>CDHR2</i>  |
|   |                    |     | netMHCpan 2.4 | 318 nM | B*07:02 |               |
| 8 | VP <u>N</u> KERPM  | 8   | netMHC 3.0    | 18 nM  | B*07:02 | <i>FGFBP3</i> |
|   |                    |     | netMHCpan 2.4 | 27 nM  | B*07:02 |               |

| #  | Peptide Sequence | mer | Method        | Score  | HLA     | Gene ID          |
|----|------------------|-----|---------------|--------|---------|------------------|
|    |                  |     | netMHCpan 2.4 | 101 nM | B*07:05 |                  |
|    |                  |     | netMHC 3.0    | 110 nM | B*35:01 |                  |
|    |                  |     | netMHCpan 2.4 | 115 nM | B*35:01 |                  |
| 9  | YLVDLHLH         | 8   | netMHCpan 2.4 | 310 nM | A*29:01 | <i>LRRC4</i>     |
| 10 | AIRVQTPPK        | 9   | netMHCpan 2.4 | 185 nM | A*03:01 | <i>EBF3</i>      |
|    |                  |     | netMHC 3.0    | 304 nM | A*03:01 |                  |
|    |                  |     | SYFPEITHI     | 55%    | A*03:01 |                  |
| 11 | ALLNAGDVE        | 9   | SYFPEITHI     | 52%    | A*03:01 | <i>SESTD1</i>    |
| 12 | DPPEISHAT        | 9   | netMHC 3.0    | 83 nM  | B*35:01 | <i>IL2RA</i>     |
|    |                  |     | SYFPEITHI     | 52%    | B*07:02 |                  |
| 13 | EQLKNMVAF        | 9   | netMHCpan 2.4 | 153 nM | B*35:01 | <i>C14orf159</i> |
| 14 | IMSYLLTSR        | 9   | netMHC 3.0    | 177 nM | A*03:01 | <i>PTGS2</i>     |
|    |                  |     | netMHCpan 2.4 | 492 nM | A*03:01 |                  |
| 15 | KGTARRRAM        | 9   | netMHC 3.0    | 350 nM | B*07:02 | <i>SNAPIN</i>    |
|    |                  |     | netMHCpan 2.4 | 467 nM | B*07:02 |                  |
| 16 | KPEVDMGVV        | 9   | netMHC 3.0    | 186 nM | B*07:02 | <i>TFB1M</i>     |
|    |                  |     | SYFPEITHI     | 55%    | B*07:02 |                  |
| 17 | KPIIIGCHA        | 9   | netMHC 3.0    | 313 nM | B*07:02 | <i>IDH1</i>      |
|    |                  |     | SYFPEITHI     | 55%    | B*07:02 |                  |
| 18 | MGVVHFTPL        | 9   | netMHC 3.0    | 278 nM | B*35:01 | <i>TFB1M</i>     |
|    |                  |     | netMHCpan 2.4 | 467 nM | B*35:01 |                  |
| 19 | PIIIGCHAY        | 9   | netMHCpan 2.4 | 220 nM | A*29:01 | <i>IDH1</i>      |
| 20 | PPEISHATF        | 9   | netMHC 3.0    | 238 nM | B*35:01 | <i>IL2RA</i>     |
|    |                  |     | SYFPEITHI     | 52%    | B*07:02 |                  |
| 21 | PPKHIPGVV        | 9   | SYFPEITHI     | 52%    | B*07:02 | <i>EBF3</i>      |
| 22 | RPVFKNFPL        | 9   | netMHCpan 2.4 | 4 nM   | B*07:02 | <i>RNF216</i>    |
|    |                  |     | netMHC 3.0    | 7 nM   | B*07:02 |                  |
|    |                  |     | netMHCpan 2.4 | 8 nM   | B*07:05 |                  |
|    |                  |     | netMHC 3.0    | 196 nM | B*35:01 |                  |
|    |                  |     | netMHCpan 2.4 | 207 nM | B*35:01 |                  |
|    |                  |     | SYFPEITHI     | 67%    | B*07:02 |                  |
| 23 | SVAKGTARR        | 9   | netMHC 3.0    | 476 nM | A*03:01 | <i>SNAPIN</i>    |
| 24 | TIHWRGQTR        | 9   | netMHC 3.0    | 350 nM | A*03:01 | <i>ZMYM3</i>     |
| 25 | TPLRYLVDL        | 9   | SYFPEITHI     | 67%    | B*07:02 | <i>LRRC4</i>     |
| 26 | TPPKHIPGV        | 9   | SYFPEITHI     | 55%    | B*07:02 | <i>EBF3</i>      |
| 27 | YLVDLHLHH        | 9   | netMHCpan 2.4 | 162 nM | A*29:01 | <i>LRRC4</i>     |
| 28 | AIMSYLLTSR       | 10  | netMHC 3.0    | 71 nM  | A*03:01 | <i>PTGS2</i>     |
|    |                  |     | netMHCpan 2.4 | 239 nM | A*03:01 |                  |
| 29 | DPPEISHATF       | 10  | netMHC 3.0    | 20 nM  | B*35:01 | <i>IL2RA</i>     |
|    |                  |     | netMHCpan 2.4 | 239 nM | B*35:01 |                  |
|    |                  |     | SYFPEITHI     | 57%    | B*07:02 |                  |
| 30 | EISHATFKAM       | 10  | netMHC 3.0    | 256 nM | B*35:01 | <i>IL2RA</i>     |
|    |                  |     | netMHCpan 2.4 | 274 nM | B*35:01 |                  |
| 31 | GLSGYKSSH        | 10  | SYFPEITHI     | 57%    | A*03:01 | <i>KMT2C</i>     |

| #  | Peptide Sequence              | mer | Method        | Score  | HLA     | Gene ID          |
|----|-------------------------------|-----|---------------|--------|---------|------------------|
| 32 | HAIRVQT <u>PPK</u>            | 10  | netMHCpan 2.4 | 497 nM | A*03:01 | <i>EBF3</i>      |
| 33 | HPH <u>S</u> HWAQQY           | 10  | netMHC 3.0    | 28 nM  | B*35:01 | <i>TEP1</i>      |
|    |                               |     | netMHCpan 2.4 | 14 nM  | B*35:01 |                  |
| 34 | KPEVD <u>M</u> GVVH           | 10  | netMHC 3.0    | 418 nM | B*35:01 | <i>TFB1M</i>     |
| 35 | KPII <u>G</u> CHAY            | 10  | netMHCpan 2.4 | 19 nM  | B*35:01 | <i>IDH1</i>      |
|    |                               |     | netMHC 3.0    | 24 nM  | B*35:01 |                  |
| 36 | LPDHP <u>S</u> HWA            | 10  | SYFPEITHI     | 57%    | B*07:02 | <i>TEP1</i>      |
| 37 | PLPPVR <u>P</u> VFK           | 10  | netMHC 3.0    | 193 nM | A*03:01 | <i>RNF216</i>    |
|    |                               |     | SYFPEITHI     | 67%    | A*03:01 |                  |
| 38 | QPI <u>F</u> NLTVSA           | 10  | netMHC 3.0    | 264 nM | B*07:02 | <i>CDHR2</i>     |
|    |                               |     | netMHCpan 2.4 | 279 nM | B*35:01 |                  |
|    |                               |     | netMHCpan 2.4 | 406 nM | B*07:02 |                  |
|    |                               |     | SYFPEITHI     | 63%    | B*07:02 |                  |
| 39 | <u>S</u> HATFKAMAY            | 10  | netMHCpan 2.4 | 328 nM | A*29:01 | <i>IL2RA</i>     |
| 40 | TPPK <u>H</u> IPGVV           | 10  | SYFPEITHI     | 60%    | B*07:02 | <i>EBF3</i>      |
| 41 | VMAEMSGV <u>H</u> K           | 10  | netMHC 3.0    | 31 nM  | A*03:01 | <i>CCT8L2</i>    |
|    |                               |     | netMHCpan 2.4 | 79 nM  | A*03:01 |                  |
| 42 | VPKPEVD <u>M</u> GV           | 10  | SYFPEITHI     | 57%    | B*07:02 | <i>TFB1M</i>     |
| 43 | VPNKERP <u>M</u> GT           | 10  | SYFPEITHI     | 57%    | B*07:02 | <i>FGFBP3</i>    |
| 44 | I <u>I</u> GCHAYGDQY          | 11  | netMHCpan 2.4 | 225 nM | A*29:01 | <i>IDH1</i>      |
| 45 | I <u>S</u> HATFKAMAY          | 11  | netMHCpan 2.4 | 102 nM | A*29:01 | <i>IL2RA</i>     |
|    |                               |     | netMHC 3.0    | 209 nM | A*03:01 |                  |
|    |                               |     | netMHCpan 2.4 | 247 nM | B*35:01 |                  |
| 46 | KPEVD <u>M</u> GVVHF          | 11  | netMHC 3.0    | 341 nM | B*07:02 | <i>TFB1M</i>     |
|    |                               |     | netMHC 3.0    | 248 nM | B*35:01 |                  |
| 47 | MSY <u>L</u> LSRSHL           | 11  | netMHCpan 2.4 | 169 nM | C15:05  | <i>PTGS2</i>     |
| 48 | <u>N</u> MVAFFLGCSF           | 11  | netMHCpan 2.4 | 131 nM | B*35:01 | <i>C14orf159</i> |
| 49 | RPVFK <u>N</u> FPLNM          | 11  | netMHC 3.0    | 16 nM  | B*07:02 | <i>RNF216</i>    |
|    |                               |     | netMHCpan 2.4 | 12 nM  | B*07:02 |                  |
|    |                               |     | netMHCpan 2.4 | 32 nM  | B*07:05 |                  |
|    |                               |     | netMHCpan 2.4 | 173 nM | B*35:01 |                  |
|    |                               |     | netMHC 3.0    | 273 nM | B*35:01 |                  |
| 50 | VAKG <u>T</u> ARRRAM          | 11  | netMHC 3.0    | 201 nM | B*07:02 | <i>SNAPIN</i>    |
|    |                               |     | netMHCpan 2.4 | 322 nM | B*07:02 |                  |
| 51 | YSEQLK <u>N</u> MVAF          | 11  | netMHC 3.0    | 86 nM  | B*35:01 | <i>C14orf159</i> |
|    |                               |     | netMHCpan 2.4 | 230 nM | B*35:01 |                  |
| 52 | DVSLDYETQ <u>P</u> IF         | 12  | netMHC 3.0    | 292 nM | B*35:01 | <i>CDHR2</i>     |
| 53 | E <u>I</u> SATFKAMAY          | 12  | netMHC 3.0    | 93 nM  | B*35:01 | <i>IL2RA</i>     |
| 54 | EVD <u>M</u> GVVHFTPL         | 12  | netMHC 3.0    | 483 nM | B*35:01 | <i>TFB1M</i>     |
| 55 | IPFLRNA <u>I</u> MSY <u>L</u> | 12  | netMHC 3.0    | 53 nM  | B*07:02 | <i>PTGS2</i>     |
| 56 | I <u>S</u> HATFKAMAYK         | 12  | netMHC 3.0    | 21 nM  | A*03:01 | <i>IL2RA</i>     |
| 57 | <u>K</u> AALVPNKERPM          | 12  | netMHC 3.0    | 426 nM | B*07:02 | <i>FGFBP3</i>    |
| 58 | PPEI <u>S</u> HATFKAM         | 12  | netMHC 3.0    | 223 nM | B*35:01 | <i>IL2RA</i>     |
|    |                               |     | netMHC 3.0    | 303 nM | B*07:02 |                  |

| #  | Peptide Sequence               | mer | Method     | Score  | HLA     | Gene ID          |
|----|--------------------------------|-----|------------|--------|---------|------------------|
| 59 | PPV <u>R</u> PVFK <u>N</u> FPL | 12  | netMHC 3.0 | 451 nM | B*07:02 | <i>RNF216</i>    |
| 60 | RLNH <u>S</u> VAK <u>G</u> TAR | 12  | netMHC 3.0 | 56 nM  | A*03:01 | <i>SNAPIN</i>    |
| 61 | RPVFK <u>N</u> FPL <u>N</u> MG | 12  | netMHC 3.0 | 407 nM | B*07:02 | <i>RNF216</i>    |
| 62 | SVAK <u>G</u> TARRRAM          | 12  | netMHC 3.0 | 35 nM  | B*07:02 | <i>SNAPIN</i>    |
| 63 | TPLRYLV <u>D</u> LHLH          | 12  | netMHC 3.0 | 441 nM | B*35:01 | <i>LRRC4</i>     |
| 64 | VPKPEVD <u>M</u> GVVH          | 12  | netMHC 3.0 | 477 nM | B*35:01 | <i>TFB1M</i>     |
| 65 | WVKPII <u>I</u> G <u>C</u> HAY | 12  | netMHC 3.0 | 37 nM  | B*35:01 | <i>IDH1</i>      |
| 66 | YSEQLK <u>N</u> MVAFF          | 12  | netMHC 3.0 | 233 nM | B*35:01 | <i>C14orf159</i> |



**Supplementary Table 10: Epitope Prediction of mutated Ligands (L06/10) current**

Shown are *in silico* predicted HLA class I peptide ligands (amino acid alterations in peptide sequences are underlined) based on mutations provided in **Suppl. Table 8**. Predictions encompass 9-12mer peptides and have been predicted using respective dedicated currently available software. Further information regarding bioinformatics analyses is given under **Suppl. Material and Methods**. Scoring of putative HLA binding peptides according to the used software algorithms together with predicted HLA alleles matching the patient given in nM for NetMHCpan 2.8 (42, 43) and NetMHC 3.4 (15, 45, 46) respectively or % of maximal binding (50% max.) for SYFPEITHI\* 2015 (in house version). Respective cut offs were predefined at <500nM for NetMHCpan 2.8 and NetMHC 3.4 or >50%max. for SYFPEITHI\*. As matrices for HLA allele B\*07:05 were not always available closely related HLA allele B\*07:02 was additionally used when available. Further gene identifiers (Gene ID) according to the National Center for Biotechnology Information (NCBI) are listed.

| # | Peptide           | mer | Method        | Score  | HLA     | Gene          |
|---|-------------------|-----|---------------|--------|---------|---------------|
| 1 | AGD <u>V</u> EDLV | 8   | SYFPEITHI*    | 51%    | C*04:01 | <i>SESTD1</i> |
| 2 | E <u>I</u> SHATFK | 8   | netMHC 3.4    | 366 nM | A*03:01 | <i>IL2RA</i>  |
| 3 | GFQDK <u>E</u> DL | 8   | SYFPEITHI*    | 54%    | C*04:01 | <i>DUOX1</i>  |
| 4 | GYDLDL <u>D</u> H | 8   | SYFPEITHI*    | 54%    | C*04:01 | <i>KLHL34</i> |
| 5 | HPH <u>S</u> HWAQ | 8   | netMHC 3.4    | 83 nM  | B*35:01 | <i>TEP1</i>   |
|   |                   |     | netMHCpan 2.8 | 351 nM | C*15:05 |               |
| 6 | H <u>S</u> HWAQQY | 8   | netMHC 3.4    | 58 nM  | B*35:01 | <i>TEP1</i>   |
|   |                   |     | netMHCpan 2.8 | 139 nM | C*04:01 |               |
|   |                   |     | netMHCpan 2.8 | 272 nM | A*29:01 |               |
| 7 | IIIG <u>C</u> HAY | 8   | netMHCpan 2.8 | 13 nM  | A*29:01 | <i>IDH1</i>   |
|   |                   |     | netMHC 3.4    | 65 nM  | B*35:01 |               |
|   |                   |     | netMHCpan 2.8 | 84 nM  | C*04:01 |               |
| 8 | KAALVP <u>N</u> K | 8   | netMHC 3.4    | 99 nM  | A*03:01 | <i>FGFBP3</i> |
|   |                   |     | netMHCpan 2.8 | 204 nM | A*03:01 |               |
| 9 | MSY <u>L</u> LTSR | 8   | netMHC 3.4    | 120 nM | A*03:01 | <i>PTGS2</i>  |

| #  | Peptide                     | mer | Method        | Score  | HLA     | Gene             |
|----|-----------------------------|-----|---------------|--------|---------|------------------|
|    |                             |     | netMHCpan 2.8 | 175 nM | A*03:01 |                  |
| 10 | QPIFNLT <u>V</u>            | 8   | netMHCpan 2.8 | 289 nM | C*15:05 | <i>CDHR2</i>     |
|    |                             |     | netMHCpan 2.8 | 462 nM | C*04:01 |                  |
|    |                             |     | netMHCpan 2.8 | 483 nM | B*35:01 |                  |
|    |                             |     | netMHCpan 2.8 | 483 nM | B*35:01 |                  |
| 11 | RYLV <u>D</u> LHL           | 8   | SYFPEITHI*    | 59%    | C*04:01 | <i>LRR4</i>      |
| 12 | VPN <u>K</u> ERPM           | 8   | netMHCpan 2.8 | 22 nM  | B*35:01 | <i>FGFBP3</i>    |
|    |                             |     | netMHCpan 2.8 | 22 nM  | C*15:01 |                  |
|    |                             |     | netMHC 3.4    | 56 nM  | B*35:01 |                  |
|    |                             |     | netMHCpan 2.8 | 78 nM  | C*04:01 |                  |
|    |                             |     | netMHC 3.4    | 193 nM | B*07:02 |                  |
| 13 | YLV <u>D</u> LHLH           | 8   | netMHCpan 2.8 | 267 nM | A*29:01 | <i>LRR4</i>      |
| 14 | AIRVQTP <u>P</u> K          | 9   | netMHCpan 2.8 | 103 nM | A*03:01 | <i>EBF3</i>      |
|    |                             |     | netMHC 3.4    | 107 nM | A*03:01 |                  |
|    |                             |     | SYFPEITHI*    | 68%    | A*03:01 |                  |
| 15 | DPPEI <u>S</u> HAT          | 9   | SYFPEITHI*    | 52%    | B*07:02 | <i>IL2RA</i>     |
| 16 | D <u>V</u> EDLVELK          | 9   | SYFPEITHI*    | 74%    | A*03:01 | <i>SESTD1</i>    |
| 17 | EQLK <u>N</u> MVAF          | 9   | netMHCpan 2.8 | 316 nM | C*04:01 | <i>C14orf159</i> |
| 18 | EVD <u>M</u> GVVHF          | 9   | SYFPEITHI*    | 61%    | C*04:01 | <i>TFB1M</i>     |
| 19 | GD <u>V</u> EDLVEL          | 9   | SYFPEITHI*    | 54%    | B*35:01 | <i>SESTD1</i>    |
| 20 | GYDL <u>D</u> LHW           | 9   | SYFPEITHI*    | 61%    | C*04:01 | <i>KLHL34</i>    |
| 21 | HPH <u>S</u> HWAQQ          | 9   | netMHC 3.4    | 354 nM | B*35:01 | <i>TEP1</i>      |
| 22 | <u>H</u> WEDIGCAL           | 9   | SYFPEITHI*    | 57%    | B*35:01 | <i>KLHL34</i>    |
| 23 | IMSY <u>L</u> LTSR          | 9   | netMHC 3.4    | 414 nM | A*03:01 | <i>PTGS2</i>     |
|    |                             |     | netMHCpan 2.8 | 497 nM | A*03:01 |                  |
| 24 | I <u>S</u> HATFKAM          | 9   | netMHCpan 2.8 | 477 nM | C*04:01 | <i>IL2RA</i>     |
| 25 | KED <u>L</u> TWEDF          | 9   | SYFPEITHI*    | 58%    | C*04:01 | <i>DUOX1</i>     |
| 26 | KPEVD <u>M</u> GVV          | 9   | netMHC 3.4    | 96 nM  | B*07:02 | <i>TFB1M</i>     |
|    |                             |     | netMHCpan 2.8 | 150 nM | C*15:05 |                  |
|    |                             |     | netMHCpan 2.8 | 410 nM | B*35:01 |                  |
|    |                             |     | SYFPEITHI*    | 55%    | B*07:02 |                  |
| 27 | KPII <u>G</u> CHA           | 9   | SYFPEITHI*    | 55%    | B*07:02 | <i>IDH1</i>      |
| 28 | <u>M</u> GVVHFTPL           | 9   | netMHCpan 2.8 | 385 nM | C*04:01 | <i>TFB1M</i>     |
| 29 | NLPD <u>H</u> PH <u>S</u> H | 9   | SYFPEITHI*    | 61%    | A*03:01 | <i>TEP1</i>      |
| 30 | PII <u>G</u> CHAY           | 9   | netMHCpan 2.8 | 134 nM | A*29:01 | <i>IDH1</i>      |
|    |                             |     | SYFPEITHI*    | 52%    | A*03:01 |                  |
| 31 | PLRYLV <u>D</u> LH          | 9   | SYFPEITHI*    | 58%    | A*03:01 | <i>LRR4</i>      |
| 32 | PPEI <u>S</u> HATF          | 9   | SYFPEITHI*    | 71%    | B*35:01 | <i>IL2RA</i>     |
|    |                             |     | SYFPEITHI*    | 52%    | B*07:02 |                  |
| 33 | PP <u>K</u> HIPGVV          | 9   | SYFPEITHI*    | 52%    | B*07:02 | <i>EBF3</i>      |
| 34 | QYSEQL <u>K</u> NM          | 9   | SYFPEITHI*    | 56%    | C*04:01 | <i>C14orf159</i> |
| 35 | RKAALVP <u>N</u> K          | 9   | SYFPEITHI*    | 52%    | A*03:01 | <i>FGFBP3</i>    |
| 36 | RPVF <u>K</u> NFPL          | 9   | netMHCpan 2.8 | 6 Nm   | C*15:02 | <i>RNF216</i>    |
|    |                             |     | netMHC 3.4    | 9 nM   | B*07:02 |                  |
|    |                             |     | netMHCpan 2.8 | 213 nM | C*04:01 |                  |

| #  | Peptide     | mer | Method        | Score  | HLA     | Gene           |
|----|-------------|-----|---------------|--------|---------|----------------|
|    |             |     | netMHC 3.4    | 429 nM | B*35:01 |                |
|    |             |     | SYFPEITHI*    | 75%    | B*35:01 |                |
|    |             |     | SYFPEITHI*    | 67%    | C*04:01 |                |
| 37 | RVQTPPKHI   | 9   | SYFPEITHI*    | 52%    | A*03:01 | <i>EBF3</i>    |
| 38 | SVAKGTARR   | 9   | SYFPEITHI*    | 55%    | A*03:01 | <i>SNAPIN</i>  |
| 39 | TIHWRGQTR   | 9   | SYFPEITHI*    | 52%    | A*03:01 | <i>ZMYM3</i>   |
| 40 | TPLRYLVDL   | 9   | netMHCpan 2.8 | 214 nM | C*15:05 | <i>LRRC4</i>   |
|    |             |     | netMHC 3.4    | 264 nM | B*07:02 |                |
|    |             |     | netMHCpan 2.8 | 401 nM | B*35:01 |                |
|    |             |     | SYFPEITHI*    | 86%    | B*35:01 |                |
|    |             |     | SYFPEITHI*    | 67%    | B*07:02 |                |
| 41 | TPPKHIPGV   |     | SYFPEITHI*    | 55%    | B*07:02 | <i>EBF3</i>    |
| 42 | VFKNFPLNM   | 9   | SYFPEITHI*    | 53%    | C*04:01 | <i>RNF216</i>  |
| 43 | YLVDLHLHH   | 9   | netMHCpan 2.8 | 178 nM | A*29:01 | <i>LRRC4</i>   |
|    |             |     | SYFPEITHI*    | 61%    | A*03:01 |                |
| 44 | AGDVEDLVEL  | 10  | SYFPEITHI*    | 56%    | C*04:01 | <i>SESTD1</i>  |
| 45 | AIMSYLLTSR  | 10  | netMHC 3.4    | 130 nM | A*03:01 | <i>PTGS2</i>   |
|    |             |     | netMHCpan 2.8 | 175 nM | A*03:01 |                |
| 46 | DPPEISHATF  | 10  | netMHCpan 2.8 | 201 nM | C*04:01 | <i>IL2RA</i>   |
|    |             |     | SYFPEITHI*    | 77%    | B*35:01 |                |
|    |             |     | SYFPEITHI*    | 57%    | B*07:02 |                |
| 47 | DYETQPIFNL  | 10  | SYFPEITHI*    | 51%    | C*04:01 | <i>CDHR2</i>   |
| 48 | EISHATFKAM  | 10  | netMHCpan 2.8 | 486 nM | C*04:01 | <i>IL2RA</i>   |
| 49 | FLRNAIMSYL  | 10  | netMHCpan 2.8 | 310 nM | C*15:05 | <i>PTGS2</i>   |
| 50 | GYDLDLHWE   | 10  | SYFPEITHI*    | 54%    | C*04:01 | <i>KLHL34</i>  |
| 51 | HAIRVQTPPK  | 10  | netMHC 3.4    | 422 nM | A*03:01 | <i>EBF3</i>    |
| 52 | HPHSHWAQQY  | 10  | netMHCpan 2.8 | 11 nM  | C*04:01 | <i>TEP1</i>    |
|    |             |     | netMHC 3.4    | 37nM   | B*35:01 |                |
|    |             |     | SYFPEITHI*    | 85%    | B*35:01 |                |
| 53 | KPIIGCHAY   | 10  | netMHCpan 2.8 | 31 nM  | C*04:01 | <i>IDH1</i>    |
|    |             |     | netMHC 3.4    | 34 nM  | B*35:01 |                |
|    |             |     | SYFPEITHI*    | 81%    | B*35:01 |                |
| 54 | LPDHPHSHWA  | 10  | SYFPEITHI*    | 57%    | B*07:02 | <i>TEP1</i>    |
| 55 | PLPPVRPVFK  | 10  | SYFPEITHI*    | 71%    | A*03:01 | <i>RNF216</i>  |
| 56 | PPVRPVFKNF  | 10  | SYFPEITHI*    | 77%    | B*35:01 | <i>RNF216</i>  |
|    |             |     | SYFPEITHI*    | 57%    | B*07:02 |                |
| 57 | QPIFNLTVSA  | 10  | netMHCpan 2.8 | 297 nM | C*15:05 | <i>CDHR2</i>   |
|    |             |     | netMHCpan 2.8 | 338 nM | C*04:01 |                |
|    |             |     | netMHCpan 2.8 | 485 nM | B*35:01 |                |
|    |             |     | SYFPEITHI*    | 63%    | B*07:02 |                |
| 58 | RLAÇSGDDLRL | 10  | SYFPEITHI*    | 52%    | A*03:01 | <i>DCAF8L1</i> |
| 59 | RVQTPPKHIP  | 10  | SYFPEITHI*    | 52%    | A*03:01 | <i>EBF3</i>    |
| 60 | SHATFKAMAY  | 10  | netMHCpan 2.8 | 479 nM | A*29:01 | <i>IL2RA</i>   |
| 61 | SLDYETQPIF  | 10  | SYFPEITHI*    | 51%    | C*04:01 | <i>CDHR2</i>   |

| #  | Peptide      | mer | Method        | Score  | HLA     | Gene      |
|----|--------------|-----|---------------|--------|---------|-----------|
| 62 | SYLLTSRSHL   | 10  | SYFPEITHI*    | 62%    | C*04:01 | PTGS2     |
| 63 | TPPKHIPGVV   | 10  | SYFPEITHI*    | 60%    | B*07:02 | EBF3      |
| 64 | VEDLVELKSL   | 10  | SYFPEITHI*    | 62%    | C*04:01 | SESTD1    |
| 65 | VMAEMSGVHK   | 10  | netMHC 3.4    | 42 nM  | A*03:01 | CCT8L2    |
|    |              |     | netMHCpan 2.8 | 72 nM  | A*03:01 |           |
| 66 | VPKPEVDMGV   | 10  | SYFPEITHI*    | 57%    | B*07:02 | TFB1M     |
| 67 | VPNKERPMGT   | 10  | SYFPEITHI*    | 57%    | B*07:02 | FGFBP3    |
| 68 | DVMAEMSGVHK  | 11  | SYFPEITHI*    | 69%    | A*03:01 | CCT8L2    |
| 69 | IIGCHAYGDQY  | 11  | netMHCpan 2.8 | 163 nM | A*29:01 | IDH1      |
| 70 | ISHATFKAMAY  | 11  | netMHCpan 2.8 | 79 nM  | C*04:01 | IL2RA     |
|    |              |     | netMHCpan 2.8 | 80 nM  | A*29:01 |           |
|    |              |     | netMHC 3.4    | 133 nM | B*35:01 |           |
| 71 | KPEVDMGVVHF  | 11  | SYFPEITHI*    | 67%    | B*07:02 | TFB1M     |
| 72 | LPPVRPVFKNF  | 11  | SYFPEITHI*    | 57%    | B*07:02 | RNF216    |
| 73 | MSYLLTSRSHL  | 11  | netMHCpan 2.8 | 229 nM | B*07:05 | PTGS2     |
| 74 | NMVAFFLGCSF  | 11  | netMHCpan 2.8 | 268 nM | C*04:01 | C14orf159 |
|    |              |     | netMHC 3.4    | 447 nM | B*35:01 |           |
| 75 | PPEISHATFKA  | 11  | SYFPEITHI*    | 57%    | B*07:02 | IL2RA     |
| 76 | PPKHIPGVVEV  | 11  | SYFPEITHI*    | 63%    | B*07:02 | EBF3      |
| 77 | RPVFKNFPLNM  | 11  | netMHC 3.4    | 25 nM  | B*07:02 | RNF216    |
|    |              |     | netMHCpan 2.8 | 26 nM  | B*35:01 |           |
|    |              |     | netMHCpan 2.8 | 29 nM  | C*15:05 |           |
|    |              |     | netMHC 3.4    | 291 nM | B*35:01 |           |
|    |              |     | netMHCpan 2.8 | 363 nM | C*04:01 |           |
|    |              |     | SYFPEITHI*    | 63%    | B*07:02 |           |
| 78 | TPLRYLVDLHL  | 11  | netMHCpan 2.8 | 275 nM | C*15:05 | LRRC4     |
|    |              |     | netMHCpan 2.8 | 449 nM | B*35:01 |           |
|    |              |     | SYFPEITHI*    | 73%    | B*07:02 |           |
| 79 | VAKGTARRRAM  | 11  | netMHCpan 2.8 | 337 nM | C*15:05 | SNAPIN    |
|    |              |     | netMHCpan 2.8 | 344 nM | B*35:01 |           |
|    |              |     | netMHC 3.4    | 430 nM | B*35:01 |           |
| 80 | VDMGVVHFTPL  | 11  | SYFPEITHI *   | 53%    | B*07:02 | TFB1M     |
| 81 | VPKPEVDMGVV  | 11  | netMHCpan 2.8 | 401 nM | C*15:05 | TFB1M     |
|    |              |     | netMHCpan 2.8 | 595 nM | B*35:01 |           |
|    |              |     | SYFPEITHI*    | 60%    | B*07:02 |           |
| 82 | YSEQLKNMVAF  | 11  | netMHC 3.4    | 172 nM | B*35:01 | C14orf159 |
|    |              |     | netMHCpan 2.8 | 309 nM | C*04:01 |           |
| 83 | DVSLDYETQPIF | 12  | netMHC 3.4    | 414 nM | B*35:01 | CDHR2     |
| 84 | EISHATFKAMAY | 12  | netMHC 3.4    | 91 nM  | B*35:01 | IL2RA     |
| 85 | HPHSHWAQQYPS | 12  | netMHC 3.4    | 89 nM  | B*35:01 | TEP1      |
| 86 | IIIGCHAYGDQY | 12  | netMHC 3.4    | 398 nM | B*35:01 | IDH1      |
| 87 | IPFLRNAIMSYL | 12  | netMHC 3.4    | 72 nM  | B*07:02 | PTGS2     |
| 88 | ISHATFKAMAYK | 12  | netMHC 3.4    | 52 nM  | A*03:01 | IL2RA     |
| 89 | PPVRPVFKNFPL | 12  | netMHC 3.4    | 149 nM | B*07:02 | RNF216    |

| #  | Peptide      | mer | Method     | Score  | HLA     | Gene          |
|----|--------------|-----|------------|--------|---------|---------------|
| 90 | RLNHSVAKGTAR | 12  | netMHC 3.4 | 98 nM  | A*03:01 | <i>SNAPIN</i> |
| 91 | SVAKGTARRRAM | 12  | netMHC 3.4 | 17 nM  | B*07:02 | <i>SNAPIN</i> |
|    |              |     | netMHC 3.4 | 357 nM | B*35:01 |               |
| 92 | WVKPIIGCHAY  | 12  | netMHC 3.4 | 43 nM  | B*35:01 | <i>IDH1</i>   |

### Supplementary Table 11: WES Results (L04/12)

Shown are sequencing results obtained by WES (whole exome sequencing) of lesion L04/12 (*in loco* recurrent tumor), yielding basic somatic variants. Complex variants are excluded as being unsuitable for the subsequent prediction of HLA-ligands. In sequential order of columns from left to right: serial number; chromosome number; start and end position of somatic variant, ref.: reference base; obs.: observed base at respective chromosomal location; allele frequency and depth of somatic variant as sequenced by WES in tumor and reference tissue (normal); Ref. Seq. (NCBI Reference Sequence) such as variant type (MV: missense variant; DV: downstream gene variant; SG: stop gain variant) and putative AA (amino acid) alteration introduced by somatic variant; n.d. no data; <sup>±</sup> variant excluded for peptide prediction.

| # | #chr | start     | end       | gene          | ref. | obs. | WES          |       |              |       | Ref. Seq.<br>variant type<br>[AA alteration] |
|---|------|-----------|-----------|---------------|------|------|--------------|-------|--------------|-------|----------------------------------------------|
|   |      |           |           |               |      |      | tumor        |       | normal       |       |                                              |
|   |      |           |           |               |      |      | allele freq. | depth | allele freq. | depth |                                              |
| 1 | chr2 | 25358435  | 25358435  | <i>EFR3B</i>  | C    | T    | 0.18         | 108   | 0.00         | 130   | NM_014971.1<br>SG [R471*] <sup>±</sup>       |
| 2 | chr2 | 179989221 | 179989221 | <i>SESTD1</i> | T    | A    | 0.15         | 68    | 0.00         | 99    | NM_178123.4<br>MV [E346V]                    |
| 3 | chr5 | 71494779  | 71494779  | <i>MAP1B</i>  | G    | A    | 0.14         | 50    | 0.00         | 40    | NM_005909.3<br>MV [G866D]                    |
| 4 | chr6 | 90499570  | 90499570  | <i>MDN1</i>   | T    | G    | 0.27         | 26    | 0.02         | 43    | NM_014611.2<br>MV [T387P]                    |

| #  | #chr  | start     | end       | gene             | ref. | obs. | WES             |       |                 |       | Ref. Seq.<br>variant type<br>[AA alteration]                                                                                                                                                              |
|----|-------|-----------|-----------|------------------|------|------|-----------------|-------|-----------------|-------|-----------------------------------------------------------------------------------------------------------------------------------------------------------------------------------------------------------|
|    |       |           |           |                  |      |      | tumor           |       | normal          |       |                                                                                                                                                                                                           |
|    |       |           |           |                  |      |      | allele<br>freq. | depth | allele<br>freq. | depth |                                                                                                                                                                                                           |
| 5  | chr7  | 151848648 | 151848648 | <i>KMT2C</i>     | T    | C    | 0.08            | 50    | 0.00            | 49    | NM_170606.2<br>MV [D4182G]                                                                                                                                                                                |
| 6  | chr8  | 41476225  | 41476225  | <i>AGPAT6</i>    | C    | T    | 0.06            | 119   | 0.00            | 166   | NM_178819.3<br>MV [A59V]                                                                                                                                                                                  |
| 7  | chr10 | 6067959   | 6067959   | <i>IL2RA</i>     | G    | A    | 0.06            | 233   | 0.00            | 249   | NM_000417.2<br>MV [P32S]                                                                                                                                                                                  |
| 8  | chr10 | 118386393 | 118386393 | <i>PNLIPRP2</i>  | A    | G    | 0.08            | 84    | 0.00            | 129   | NM_005396.4<br>MV [K117E]                                                                                                                                                                                 |
| 9  | chr11 | 1270922   | 1270922   | <i>MUC5B</i>     | C    | G    | 0.11            | 96    | 0.01            | 133   | NM_002458.2<br>MV [S4271C]                                                                                                                                                                                |
| 10 | chr14 | 20854241  | 20854241  | <i>TEP1</i>      | A    | G    | 0.08            | 59    | 0.00            | 74    | NM_007110.4<br>MV [F992S]                                                                                                                                                                                 |
| 11 | chr14 | 91636435  | 91636435  | <i>C14orf159</i> | G    | A    | 0.07            | 90    | 0.00            | 106   | NM_001102368.2;<br>NM_001102366.2;<br>NM_001102369.2;<br>NM_001286470.1;<br>NM_001286472.1;<br>NM_024952.7;<br>NM_001102367.2;<br>NM_001286471.1<br>MV[D116N]<br>NM_001286473.1<br>DV [n.d.] <sup>‡</sup> |
| 12 | chr17 | 3101176   | 3101176   | <i>OR1A2</i>     | C    | T    | 0.15            | 108   | 0.00            | 158   | NM_012352.1<br>SG [R122*] <sup>‡</sup>                                                                                                                                                                    |
| 13 | chr17 | 7750165   | 7750165   | <i>KDM6B</i>     | C    | T    | 0.08            | 65    | 0.00            | 71    | NM_001080424.1<br>MV [P247L]                                                                                                                                                                              |

| #  | #chr  | start    | end      | gene                                              | ref. | obs. | WES             |       |                 |       | Ref. Seq.<br>variant type<br>[AA alteration]                                                                                                                                                   |
|----|-------|----------|----------|---------------------------------------------------|------|------|-----------------|-------|-----------------|-------|------------------------------------------------------------------------------------------------------------------------------------------------------------------------------------------------|
|    |       |          |          |                                                   |      |      | tumor           |       | normal          |       |                                                                                                                                                                                                |
|    |       |          |          |                                                   |      |      | allele<br>freq. | depth | allele<br>freq. | depth |                                                                                                                                                                                                |
| 14 | chr19 | 43920102 | 43920102 | <i>TEX101</i>                                     | A    | T    | 0.11            | 45    | 0.00            | 46    | NM_031451.4<br><i>MV</i> [I29F]<br>NM_001130011.1<br><i>MV</i> [I11F]                                                                                                                          |
| 15 | chr22 | 17072027 | 17072027 | <i>CCT8L2</i>                                     | G    | T    | 0.07            | 68    | 0.00            | 86    | NM_014406.4<br><i>MV</i> [Q472K]                                                                                                                                                               |
| 16 | chrX  | 21674105 | 21674105 | <i>KLHL34<sup>a</sup>,<br/>CNKSR2<sup>b</sup></i> | C    | T    | 0.17            | 63    | 0.00            | 65    | <sup>a</sup> NM_153270.1<br><i>MV</i> [R601H]<br><sup>b</sup> NM_014927.3;<br><sup>b</sup> NM_001168647.1<br><i>DV</i> [n.d.] <sup>‡</sup>                                                     |
| 17 | chrX  | 91873547 | 91873547 | <i>PCDH11X</i>                                    | G    | A    | 0.06            | 271   | 0.00            | 393   | NM_032968.4<br><i>MV</i> [A1218T]<br>NM_001168360.1<br><i>MV</i> [A1210T]<br>NM_001168362.1<br><i>MV</i> [A1181T]<br>NM_001168363.1<br><i>MV</i> [A1200T]<br>NM_032969.4<br><i>MV</i> [A1208T] |



**Supplementary Table 12: Epitope Prediction of mutated Ligands (L04/12) at first vaccination**

Shown are *in silico* predicted HLA class I peptide ligands (amino acid alterations in peptide sequences are underlined) based on mutations provided in **Suppl. Table 11**. Predictions encompass 9-12mer peptides and have been predicted using dedicated software available before September 2012 previous to starting vaccinations. Further information regarding bioinformatics analyses is given under **Suppl. Material and Methods**. Scoring of putative HLA binding peptides according to the used software algorithms together with predicted HLA alleles matching the patient given in nM for NetMHCpan 2.4 (42, 43) and NetMHC 3.0 NetMHC 3.0 (44-46) respectively or % of maximal binding (50% max.) for SYFPEITHI SYFPEITHI (16). Respective cut offs were predefined at <500nM for NetMHCpan 2.4 and NetMHC 3.0 or >50%max. for SYFPEITHI. As matrices for HLA allele B\*07:05 were not always available closely related HLA allele B\*07:02 was additionally used when available. Further gene identifiers (Gene ID) according to the National Center for Biotechnology Information (NCBI) are listed.

| # | Peptide           | mer | Method        | Score  | HLA     | Gene          |
|---|-------------------|-----|---------------|--------|---------|---------------|
| 1 | DPQFGD <u>V</u> F | 8   | netMHC 3.0    | 15 nM  | B*35:01 | <i>AGPAT6</i> |
|   |                   |     | netMHCpan 2.4 | 161 nM | B*35:01 |               |
| 2 | EI <u>S</u> HATFK | 8   | netMHCpan 2.4 | 256 nM | A*03:01 | <i>IL2RA</i>  |
| 3 | FVWQPG <u>P</u> L | 8   | netMHC 3.0    | 74 nM  | B*35:01 | <i>MDN1</i>   |
|   |                   |     | netMHCpan 2.4 | 279 nM | B*35:01 |               |
|   |                   |     | netMHC 3.0    | 499 nM | B*07:02 |               |
| 4 | H <u>S</u> HWAQQY | 8   | netMHCpan 2.4 | 278 nM | A*29:01 | <i>TEP1</i>   |
|   |                   |     | netMHCpan 2.4 | 323 nM | B*35:01 |               |
|   |                   |     | netMHC 3.0    | 359 nM | B*35:01 |               |
| 5 | KTP <u>D</u> DFSY | 8   | netMHCpan 2.4 | 331 nM | A*29:01 | <i>MAP1B</i>  |
| 6 | LPDHPH <u>S</u> H | 8   | netMHCpan 2.4 | 448 nM | B*35:01 | <i>TEP1</i>   |
| 7 | LPL <u>L</u> PPPL | 8   | netMHCpan 2.4 | 34 nM  | B*07:02 | <i>KDM6B</i>  |
|   |                   |     | netMHC 3.0    | 79 nM  | B*07:02 |               |

| #  | Peptide    | mer | Method        | Score  | HLA     | Gene      |
|----|------------|-----|---------------|--------|---------|-----------|
|    |            |     | netMHCpan 2.4 | 113 nM | B*35:01 |           |
|    |            |     | netMHCpan 2.4 | 115 nM | B*07:05 |           |
|    |            |     | netMHC 3.0    | 140 nM | B*35:01 |           |
| 8  | VFWNSSKY   | 8   | netMHCpan 2.4 | 27 nM  | A*29:01 | AGPAT6    |
|    |            |     | netMHC 3.0    | 321 nM | B*35:01 |           |
| 9  | ALLNAGDVE  | 9   | SYFPEITHI     | 52%    | A*03:01 | SESTD1    |
| 10 | DPPEISHAT  | 9   | netMHC 3.0    | 83 nM  | B*35:01 | IL2RA     |
|    |            |     | SYFPEITHI     | 52%    | B*07:02 |           |
| 11 | DPQFGDVFW  | 9   | netMHC 3.0    | 318 nM | B*35:01 | AGPAT6    |
| 12 | DVFWNSSKY  | 9   | netMHCpan 2.4 | 93 nM  | B*35:01 | AGPAT6    |
|    |            |     | netMHC 3.0    | 100 nM | B*35:01 |           |
|    |            |     | netMHCpan 2.4 | 111 nM | A*29:01 |           |
| 13 | EFVWQPGPL  | 9   | netMHC 3.0    | 201 nM | B*35:01 | MDN1      |
| 14 | EQLKNMVAF  | 9   | netMHCpan 2.4 | 153 nM | B*35:01 | C14orf159 |
| 15 | GPLTQAATM  | 9   | netMHC 3.0    | 41 nM  | B*35:01 | MDN1      |
|    |            |     | netMHCpan 2.4 | 116 nM | B*07:02 |           |
|    |            |     | netMHCpan 2.4 | 138 nM | B*35:01 |           |
|    |            |     | netMHCpan 2.4 | 406 nM | B*07:05 |           |
|    |            |     | netMHC 3.0    | 489 nM | B*07:02 |           |
|    |            |     | SYFPEITHI     | 52%    | B*07:02 |           |
| 16 | PPEISHATF  | 9   | netMHC 3.0    | 238 nM | B*35:01 | IL2RA     |
|    |            |     | SYFPEITHI     | 52%    | B*07:02 |           |
| 17 | PPGLPLLPP  | 9   | SYFPEITHI     | 52%    | B*07:02 | KDM6B     |
| 18 | PPPIQVSTL  | 9   | SYFPEITHI     | 64%    | B*07:02 | PCDH11X   |
| 19 | QPGPLTQAA  | 9   | netMHC 3.0    | 271 nM | B*35:01 | MDN1      |
|    |            |     | SYFPEITHI     | 61%    | B*07:02 |           |
| 20 | SPPPIQVST  | 9   | SYFPEITHI     | 58%    | B*07:02 | PCDH11X   |
| 21 | STLHHSPPL  | 9   | netMHCpan 2.4 | 442 nM | B*07:02 | PCDH11X   |
| 22 | TPDDFSYAY  | 9   | netMHC 3.0    | 4 nM   | B*35:01 | MAP1B     |
|    |            |     | netMHCpan 2.4 | 5 nM   | B*35:01 |           |
| 23 | TPRIQHLLF  | 9   | netMHC 3.0    | 40 nM  | B*07:02 | TEX101    |
|    |            |     | netMHCpan 2.4 | 154 nM | B*07:02 |           |
|    |            |     | netMHC 3.0    | 209 nM | B*35:01 |           |
|    |            |     | netMHCpan 2.4 | 210 nM | B*35:01 |           |
|    |            |     | SYFPEITHI     | 61%    | B*07:02 |           |
| 24 | TPSCTPGTA  | 9   | SYFPEITHI     | 55%    | B*07:02 | MUC5B     |
| 25 | CTPGTAPPPK | 10  | netMHC 3.0    | 418 nM | A*03:01 | MUC5B     |
| 26 | DPPEISHATF | 10  | netMHC 3.0    | 20 nM  | B*35:01 | IL2RA     |
|    |            |     | netMHCpan 2.4 | 239 nM | B*35:01 |           |
|    |            |     | SYFPEITHI     | 57%    | B*07:02 |           |
| 27 | EISHATFKAM | 10  | netMHC 3.0    | 256 nM | B*35:01 | IL2RA     |
|    |            |     | netMHCpan 2.4 | 274 nM | B*35:01 |           |
| 28 | GLSGYKGS   | 10  | SYFPEITHI     | 57%    | A*03:01 | KMT2C     |
| 29 | HPHSHWAQQY | 10  | netMHC 3.0    | 14 nM  | B*35:01 | TEP1      |

| #  | Peptide                       | mer | Method        | Score  | HLA     | Gene      |
|----|-------------------------------|-----|---------------|--------|---------|-----------|
|    |                               |     | netMHCpan 2.4 | 28 nM  | B*35:01 |           |
| 30 | KTPD <u>D</u> FSYAY           | 10  | netMHCpan 2.4 | 80 nM  | A*29:01 | MAP1B     |
| 31 | LPDHPH <u>S</u> HWAA          | 10  | SYFPEITHI     | 57%    | B*07:02 | TEP1      |
| 32 | QPGPLTQAAT                    | 10  | netMHC 3.0    | 262 nM | B*35:01 | MDN1      |
|    |                               |     | SYFPEITHI     | 67%    | B*07:02 |           |
| 33 | <u>S</u> HATFKAMAY            | 10  | netMHCpan 2.4 | 328 nM | A*29:01 | IL2RA     |
| 34 | SPPPIQV <u>S</u> T <u>L</u>   | 10  | netMHCpan 2.4 | 82 nM  | B*07:02 | PCDH11X   |
|    |                               |     | netMHC 3.0    | 199 nM | B*07:02 |           |
|    |                               |     | netMHCpan 2.4 | 227 nM | B*07:05 |           |
|    |                               |     | SYFPEITHI     | 73%    | B*07:02 |           |
| 35 | TPRIQHLL <u>F</u> L           | 10  | netMHCpan 2.4 | 23 nM  | B*07:02 | TEX101    |
|    |                               |     | netMHC 3.0    | 24 nM  | B*07:02 |           |
|    |                               |     | netMHCpan 2.4 | 75 nM  | B*07:05 |           |
|    |                               |     | SYFPEITHI     | 83%    | B*07:02 |           |
| 36 | VMAEMSGV <u>H</u> K           | 10  | netMHC 3.0    | 31 nM  | A*03:01 | CCT8L2    |
|    |                               |     | netMHCpan 2.4 | 79 nM  | A*03:01 |           |
| 37 | DVFWNSSKYGM                   | 11  | netMHCpan 2.4 | 132 nM | B*35:01 | AGPAT6    |
|    |                               |     | netMHC 3.0    | 342 nM | B*35:01 |           |
| 38 | I <u>S</u> HATFKAMAY          | 11  | netMHCpan 2.4 | 102 nM | A*29:01 | IL2RA     |
|    |                               |     | netMHC 3.0    | 209 nM | A*03:01 |           |
|    |                               |     | netMHCpan 2.4 | 247 nM | B*35:01 |           |
| 39 | <u>N</u> MVAFFLGCSF           | 11  | netMHCpan 2.4 | 131 nM | B*35:01 | C14orf159 |
| 40 | QPGPLTQAATM                   | 11  | netMHCpan 2.4 | 70 nM  | B*35:01 | MDN1      |
|    |                               |     | netMHCpan 2.4 | 149 nM | B*07:02 |           |
|    |                               |     | netMHC 3.0    | 436 nM | B*07:02 |           |
| 41 | TPRIQHLL <u>F</u> LL          | 11  | netMHC 3.0    | 55 nM  | B*07:02 | TEX101    |
|    |                               |     | netMHCpan 2.4 | 58 nM  | B*07:02 |           |
|    |                               |     | netMHCpan 2.4 | 177 nM | B*07:05 |           |
|    |                               |     |               |        |         |           |
| 42 | V <u>S</u> T <u>L</u> LHHSPLV | 11  | netMHCpan 2.4 | 247 nM | C*15:05 | PCDH11X   |
| 43 | YSEQLK <u>N</u> MVAF          | 11  | netMHC 3.0    | 86 nM  | B*35:01 | C14orf159 |
|    |                               |     | netMHCpan 2.4 | 230 nM | B*35:01 |           |
| 44 | EI <u>S</u> HATFKAMAY         | 12  | netMHC 3.0    | 93 nM  | B*35:01 | IL2RA     |
| 45 | FVWQPGPLTQAA                  | 12  | netMHC 3.0    | 157 nM | B*35:01 | MDN1      |
| 46 | I <u>S</u> HATFKAMAYK         | 12  | netMHC 3.0    | 21 nM  | A*03:01 | IL2RA     |
| 47 | KTPD <u>D</u> FSYAYQK         | 12  | netMHC 3.0    | 332 nM | A*03:01 | MAP1B     |
| 48 | LPPGLP <u>L</u> PPPL          | 12  | netMHC 3.0    | 164 nM | B*35:01 | KDM6B     |
|    |                               |     | netMHC 3.0    | 397 nM | B*07:02 |           |
| 49 | PPEI <u>S</u> HATFKAM         | 12  | netMHC 3.0    | 223 nM | B*35:01 | IL2RA     |
|    |                               |     | netMHC 3.0    | 303 nM | B*07:02 |           |
| 50 | TPRIQHLL <u>F</u> LLV         | 12  | netMHC 3.0    | 122 nM | B*07:02 | TEX101    |
| 51 | VPGEFVWQPG <u>P</u> L         | 12  | netMHC 3.0    | 83 nM  | B*35:01 | MDN1      |
|    |                               |     |               | 309 nM | B*07:02 |           |
| 52 | YSEQLK <u>N</u> MVAFF         | 12  | netMHC 3.0    | 233 nM | B*35:01 | C14orf159 |

**Supplementary Table 13: Epitope Prediction of mutated Ligands (L04/12) current**

Shown are *in silico* predicted HLA class I peptide ligands (amino acid alterations in peptide sequences are underlined) based on mutations provided in **Suppl. Table 11**. Predictions encompass 9-12mer peptides and have been predicted using respective dedicated currently available software. Further information regarding bioinformatics analyses is given under **Suppl. Material and Methods**. Scoring of putative HLA binding peptides according to the used software algorithms together with predicted HLA alleles matching the patient given in nM for NetMHCpan 2.8 (42, 43) and NetMHC 3.4 (15, 45, 46) respectively or % of maximal binding (50% max.) for SYFPEITHI\* 2015 (in house version). Respective cut offs were predefined at <500nM for NetMHCpan 2.8 and NetMHC 3.4 or >50%max. for SYFPEITHI\*. As matrices for HLA allele B\*07:05 were not always available closely related HLA allele B\*07:02 was additionally used when available. Further gene identifiers (Gene ID) according to the National Center for Biotechnology Information (NCBI) are listed.

| # | Peptide           | mer | Method        | Score  | HLA     | Gene          |
|---|-------------------|-----|---------------|--------|---------|---------------|
| 1 | AGD <u>V</u> EDLV | 8   | SYFPEITHI*    | 51%    | C*04:01 | <i>SESTD1</i> |
| 2 | DPQFGD <u>V</u> F | 8   | netMHCpan 2.8 | 91 nM  | C*04:01 | <i>AGPAT6</i> |
|   |                   |     | netMHC 3.4    | 155 nM | B*35:01 |               |
| 3 | E <u>I</u> SHATFK | 8   | netMHC 3.4    | 366 nM | A*03:01 | <i>IL2RA</i>  |
| 4 | FVWQPG <u>P</u> L | 8   | netMHCpan 2.8 | 140 nM | C*15:05 | <i>MDN1</i>   |
|   |                   |     | netMHC 3.4    | 174 nM | B*35:01 |               |
|   |                   |     | netMHCpan 2.8 | 207 nM | C*04:01 |               |
|   |                   |     | netMHCpan 2.8 | 343 nM | B*35:01 |               |
| 5 | GYDL <u>L</u> LDH | 8   | SYFPEITHI*    | 54%    | C*04:01 | <i>KLHL34</i> |
| 6 | HPH <u>S</u> HWAQ | 8   | netMHC 3.4    | 83 nM  | B*35:01 | <i>TEP1</i>   |
|   |                   |     | netMHCpan 2.8 | 351 nM | C*15:05 |               |
| 7 | KTPD <u>D</u> FSY | 8   | netMHCpan 2.8 | 314 nM | A*29:01 | <i>MAP1B</i>  |
| 8 | LPL <u>P</u> PPPL | 8   | netMHCpan 2.8 | 22 nM  | C*15:05 | <i>KDM6B</i>  |
|   |                   |     | netMHCpan 2.8 | 29 nM  | B*35:01 |               |
|   |                   |     | netMHCpan 2.8 | 66 nM  | C*04:01 |               |

| #  | Peptide   | mer | Method        | Score  | HLA     | Gene             |
|----|-----------|-----|---------------|--------|---------|------------------|
|    |           |     | netMHC 3.4    | 67 nM  | B*35:01 |                  |
|    |           |     | netMHC 3.4    | 228 nM | B*07:02 |                  |
| 9  | PPIQVSTL  | 8   | netMHC 3.4    | 487 nM | B*35:01 | <i>PDCDHX11</i>  |
| 10 | VFWNSSKY  | 8   | netMHCpan 2.8 | 16 nM  | A*29:01 | <i>AGPAT6</i>    |
| 11 | DPPEISHAT | 9   | SYFPEITHI*    | 52%    | B*07:02 | <i>IL2RA</i>     |
| 12 | DVEDLVELK | 9   | SYFPEITHI*    | 74%    | A*03:01 | <i>SESTD1</i>    |
| 13 | DVFWNSSKY | 9   | netMHC 3.4    | 18 nM  | B*35:01 | <i>AGPAT6</i>    |
|    |           |     | netMHCpan 2.8 | 27 nM  | C*04:01 |                  |
|    |           |     | netMHCpan 2.8 | 59 nM  | A*29:01 |                  |
|    |           |     | SYFPEITHI*    | 55%    | A*03:01 |                  |
| 14 | EFVWQGPL  | 9   | SYFPEITHI*    | 56%    | C*04:01 | <i>MDN1</i>      |
| 15 | EQLKNMVAF | 9   | netMHCpan 2.8 | 316 nM | C*04:01 | <i>C14orf159</i> |
| 16 | GDVEDLVEL | 9   | SYFPEITHI*    | 54%    | B*35:01 | <i>SESTD1</i>    |
| 17 | GPLTQAATM | 9   | netMHCpan 2.8 | 122 nM | C*15:05 | <i>MDN1</i>      |
|    |           |     | netMHCpan 2.8 | 133 nM | B*35:01 |                  |
|    |           |     | netMHC 3.4    | 191 nM | B*07:02 |                  |
|    |           |     | netMHCpan 2.8 | 254 nM | C*04:01 |                  |
|    |           |     | netMHC 3.4    | 312 nM | B*35:01 |                  |
|    |           |     | SYFPEITHI*    | 68%    | B*35:01 |                  |
|    |           |     | SYFPEITHI*    | 52%    | B*07:02 |                  |
| 18 | GYDLDLHW  | 9   | SYFPEITHI*    | 61%    | C*04:01 | <i>KLHL34</i>    |
| 19 | HPHSHWAQQ | 9   | SYFPEITHI*    | 354 nM | B*35:01 | <i>TEP1</i>      |
| 20 | HWEDIGCAL | 9   | SYFPEITHI*    | 57%    | B*35:01 | <i>KLHL34</i>    |
| 21 | ISHATFKAM | 9   | netMHCpan 2.8 | 477 nM | C*04:01 | <i>IL2RA</i>     |
| 22 | KYDPQFGDV | 9   | SYFPEITHI*    | 81%    | C*04:01 | <i>AGPAT6</i>    |
| 23 | NLPDHPHSH | 9   | SYFPEITHI*    | 61%    | C*04:01 | <i>TEP1</i>      |
| 24 | PIQVSTLHH | 9   | SYFPEITHI*    | 58%    | A*03:01 | <i>PCDH11X</i>   |
| 25 | PLLPPPLPP | 9   | SYFPEITHI*    | 52%    | A*03:01 | <i>KDM6B</i>     |
| 26 | PPEISHATF | 9   | SYFPEITHI*    | 71%    | B*35:01 | <i>IL2RA</i>     |
|    |           |     | SYFPEITHI*    | 52%    | B*07:02 |                  |
| 27 | PPGLPLPP  | 9   | SYFPEITHI*    | 52%    | B*07:02 | <i>KDM6B</i>     |
| 28 | PPPIQVSTL | 9   | SYFPEITHI*    | 75%    | B*35:01 | <i>PCDH11X</i>   |
|    |           |     | SYFPEITHI*    | 64%    | B*07:02 |                  |
| 29 | QPGPLTQAA | 9   | netMHCpan 2.8 | 206 nM | C*15:05 | <i>MDN1</i>      |
|    |           |     | netMHC 3.4    | 284 nM | B*35:01 |                  |
|    |           |     | SYFPEITHI*    | 61%    | B*07:02 |                  |
| 30 | QYSEQLKNM | 9   | SYFPEITHI*    | 56%    | C*04:01 | <i>C14orf159</i> |
| 31 | RIQHLLFLL | 9   | SYFPEITHI*    | 52%    | A*03:01 | <i>TEX101</i>    |
| 32 | SPPPIQVST | 9   | SYFPEITHI*    | 58%    | B*07:02 | <i>PCDH11X</i>   |
| 33 | TPDDFSYAY | 9   | netMHC 3.4    | 2 nM   | B*35:01 | <i>MAP1B</i>     |
|    |           |     | netMHCpan 2.8 | 5 nM   | C*04:01 |                  |
|    |           |     | SYFPEITHI*    | 82%    | B*35:01 |                  |
| 34 | TPRIQHLLF | 9   | netMHC 3.4    | 53 nM  | B*07:02 | <i>TEX101</i>    |
|    |           |     | netMHCpan 2.8 | 96 nM  | B*35:01 |                  |

| #  | Peptide                      | mer | Method        | Score  | HLA     | Gene           |
|----|------------------------------|-----|---------------|--------|---------|----------------|
|    |                              |     | netMHCpan 2.8 | 215 nM | C*15:05 |                |
|    |                              |     | netMHCpan 2.8 | 255 nM | C*04:01 |                |
|    |                              |     | netMHC 3.4    | 343 nM | B*35:01 |                |
|    |                              |     | SYFPEITHI*    | 61%    | B*07:02 |                |
|    |                              |     | SYFPEITHI*    | 68%    | B*35:01 |                |
| 35 | TP <u>S</u> CTPGTA           | 9   | netMHCpan 2.8 | 55 nM  | B*07:02 | <i>MUC5B</i>   |
|    |                              |     | netMHC 3.4    | 185 nM | C*15:05 |                |
| 36 | AGD <u>V</u> EDLVEL          | 10  | SYFPEITHI*    | 56%    | C*04:01 | <i>SESTD1</i>  |
| 37 | <u>C</u> TPGTAPPPK           | 10  | SYFPEITHI*    | 65%    | A*03:01 | <i>MUC5B</i>   |
| 38 | DPPEI <u>S</u> HATF          | 10  | netMHCpan 2.8 | 201 nM | C*04:01 | <i>IL2RA</i>   |
|    |                              |     | SYFPEITHI*    | 77%    | B*35:01 |                |
|    |                              |     | SYFPEITHI*    | 57%    | B*07:02 |                |
| 39 | E <u>I</u> SATFKAM           | 10  | netMHCpan 2.8 | 486 nM | C*04:01 | <i>IL2RA</i>   |
| 40 | <u>F</u> LLVLGASLL           | 10  | SYFPEITHI*    | 54%    | B*35:01 | <i>TEX101</i>  |
| 41 | GYDL <u>D</u> L <u>D</u> HWE | 10  | SYFPEITHI*    | 54%    | C*04:01 | <i>KLHL34</i>  |
| 42 | HPH <u>S</u> HWAQQY          | 10  | netMHCpan 2.8 | 11 nM  | C*04:01 | <i>TEP1</i>    |
|    |                              |     | netMHC 3.4    | 37 nM  | B*35:01 |                |
|    |                              |     | SYFPEITHI*    | 85%    | B*35:01 |                |
| 43 | KTP <u>D</u> DFSYAY          | 10  | netMHCpan 2.8 | 83 nM  | A*29:01 | <i>MAP1B</i>   |
| 44 | KYDPQFGD <u>V</u> F          | 10  | SYFPEITHI*    | 79%    | C*04:01 | <i>AGPAT6</i>  |
| 45 | <u>L</u> LLVLGASL            | 10  | SYFPEITHI*    | 54%    | C*04:01 | <i>TEX101</i>  |
| 46 | LPDHPH <u>S</u> HWA          | 10  | SYFPEITHI*    | 57%    | B*07:02 | <i>TEP1</i>    |
| 47 | QPG <u>L</u> TQAAT           | 10  | SYFPEITHI*    | 67%    | B*07:02 | <i>MDN1</i>    |
| 48 | RIQHLL <u>F</u> LLV          | 10  | SYFPEITHI*    | 52%    | A*03:01 | <i>TEX101</i>  |
| 49 | <u>S</u> HATFKAMAY           | 10  | netMHCpan 2.8 | 479 nM | A*29:01 | <i>IL2RA</i>   |
| 50 | SPPPIQV <u>S</u> T <u>L</u>  | 10  | netMHCpan 2.8 | 46 nM  | C*15:05 | <i>PCDH11X</i> |
|    |                              |     | netMHCpan 2.8 | 56 nM  | B*35:01 |                |
|    |                              |     | netMHC 3.4    | 82 nM  | B*07:02 |                |
|    |                              |     | SYFPEITHI*    | 81%    | B*35:01 |                |
|    |                              |     | SYFPEITHI*    | 73%    | B*07:02 |                |
| 51 | TPRIQHLL <u>F</u> L          | 10  | netMHCpan 2.8 | 30 nM  | B*35:01 | <i>TEX101</i>  |
|    |                              |     | netMHC 3.4    | 41 nM  | B*07:02 |                |
|    |                              |     | netMHCpan 2.8 | 44 nM  | C*15:05 |                |
|    |                              |     | SYFPEITHI*    | 83%    | B*07:02 |                |
|    |                              |     | SYFPEITHI*    | 81%    | B*35:01 |                |
| 52 | <u>V</u> EDLVELKSL           | 10  | SYFPEITHI*    | 62%    | C*04:01 | <i>SESTD1</i>  |
| 53 | VMAEMSGV <u>H</u> <u>K</u>   | 10  | netMHC 3.4    | 42 nM  | A*03:01 | <i>CCT8L2</i>  |
|    |                              |     | netMHCpan 2.8 | 72 nM  | A*03:01 |                |
| 54 | D <u>V</u> FWNSSKYGM         | 11  | netMHC 3.4    | 123 nM | B*35:01 | <i>AGPAT6</i>  |
|    |                              |     | netMHCpan 2.8 | 211 nM | C*04:01 |                |
| 55 | DVMAEMSGV <u>H</u> <u>K</u>  | 11  | SYFPEITHI*    | 69%    | A*03:01 | <i>CCT8L2</i>  |
| 56 | FGD <u>V</u> FWNSSKY         | 11  | netMHC 3.4    | 258 nM | B*35:01 | <i>AGPAT6</i>  |
| 57 | HSPPIQV <u>S</u> T <u>L</u>  | 11  | netMHCpan 2.8 | 483 nM | B*07:05 | <i>PCDH11X</i> |
| 58 | <u>I</u> SATFKAMAY           | 11  | netMHCpan 2.8 | 79 nM  | C*04:01 | <i>IL2RA</i>   |

| #  | Peptide                        | mer | Method        | Score  | HLA     | Gene             |
|----|--------------------------------|-----|---------------|--------|---------|------------------|
|    |                                |     | netMHCpan 2.8 | 80 nM  | A*29:01 |                  |
|    |                                |     | netMHC 3.4    | 133 nM | B*35:01 |                  |
| 59 | NMVAFFLGCSF                    | 11  | netMHCpan 2.8 | 268 nM | C*04:01 | <i>C14orf159</i> |
|    |                                |     | netMHC 3.4    | 447 nM | B*35:01 |                  |
|    |                                |     | netMHCpan 2.8 | 550 nM | A*29:01 |                  |
| 60 | PPEI <u>S</u> HATFKA           | 11  | SYFPEITHI*    | 57%    | B*07:02 | <i>IL2RA</i>     |
| 61 | PPGLP <u>L</u> PPPL            | 11  | netMHC 3.4    | 77 nM  | B*07:02 | <i>KDM6B</i>     |
|    |                                |     | SYFPEITHI*    | 263 nM | B*07:02 |                  |
| 62 | QPG <u>L</u> TQAATM            | 11  | netMHC 3.4    | 64 nM  | B*35:01 | <i>MDN1</i>      |
|    |                                |     | netMHCpan 2.8 | 64 nM  | C*04:01 |                  |
|    |                                |     | netMHC 3.4    | 153 nM | B*07:02 |                  |
|    |                                |     | netMHCpan 2.8 | 169 nM | B*35:01 |                  |
|    |                                |     | SYFPEITHI*    | 63%    | B*07:02 |                  |
| 63 | TPRIQH <u>L</u> L <u>L</u> LL  | 11  | netMHC 3.4    | 32 nM  | B*07:02 | <i>TEX101</i>    |
|    |                                |     | netMHCpan 2.8 | 55 nM  | B*35:01 |                  |
|    |                                |     | netMHCpan 2.8 | 67 nM  | C*15:05 |                  |
|    |                                |     | SYFPEITHI*    | 73%    | B*07:02 |                  |
| 64 | YSEQLK <u>N</u> MVAF           | 11  | netMHC 3.4    | 172 nM | B*35:01 | <i>C14orf159</i> |
|    |                                |     | netMHCpan 2.8 | 309 nM | C*04:01 |                  |
| 65 | E <u>I</u> S <u>H</u> ATFKAMAY | 12  | netMHC 3.4    | 91 nM  | B*35:01 | <i>IL2RA</i>     |
| 66 | FVWQP <u>G</u> PLTQAA          | 12  | netMHC 3.4    | 397 nM | B*35:01 | <i>MDN1</i>      |
| 67 | HPH <u>S</u> HWAAQQYPS         | 12  | netMHC 3.4    | 89 nM  | B*35:01 | <i>TEP1</i>      |
| 68 | I <u>S</u> HATFKAMAYK          | 12  | netMHC 3.4    | 52 nM  | A*03:01 | <i>IL2RA</i>     |
| 69 | LPPGLP <u>L</u> PPPL           | 12  | netMHC 3.4    | 111 nM | B*07:02 | <i>KDM6B</i>     |
|    |                                |     | netMHC 3.4    | 192 nM | B*35:01 |                  |
| 70 | TPRIQH <u>L</u> L <u>L</u> LLV | 12  | netMHC 3.4    | 83 nM  | B*07:02 | <i>TEX101</i>    |
| 71 | VPGEFVWQ <u>P</u> GL           | 12  | netMHC 3.4    | 72 nM  | B*07:02 | <i>MDN1</i>      |

### Supplementary Table 14: WES/WTS Results (P03/13)

Shown are sequencing results obtained by WES (whole exome sequencing) and WTS (whole transcriptome sequencing) of lesion P03/13 (lung metastasis), yielding basic somatic variants. Complex variants are excluded as being unsuitable for the subsequent prediction of HLA-ligands. In sequential order of columns from left to right: serial number; chromosome number; start and end position of somatic variant, ref.: reference base; obs.: observed base at respective chromosomal location; allele frequency and depth of somatic variant as sequenced by WES in tumor and reference tissue (normal); frequency and depth of somatic variant as sequenced by WTS in tumor material; Ref. Seq. (NCBI Reference Sequence) such as variant type (MV: missense variant; DV: downstream gene variant; SG: stop gain variant; UV: upstream gene variant; SV: splice region variant) and putative AA (amino acid) alteration introduced by somatic variant; n.d. no data;  $\pm$   $\pm$  variant excluded for peptide prediction.

| # | #chr | start     | end       | gene                                                  | ref. | obs. | WES             |       |                 |       | WTS   |       | Ref. Seq.<br>variant type<br>[AA alteration]                                                                                                                            |
|---|------|-----------|-----------|-------------------------------------------------------|------|------|-----------------|-------|-----------------|-------|-------|-------|-------------------------------------------------------------------------------------------------------------------------------------------------------------------------|
|   |      |           |           |                                                       |      |      | tumor           |       | normal          |       | tumor |       |                                                                                                                                                                         |
|   |      |           |           |                                                       |      |      | allele<br>freq. | depth | allele<br>freq. | depth | freq. | depth |                                                                                                                                                                         |
| 1 | chr1 | 186277277 | 186277277 | <i>PRG4</i> <sup>a</sup> ,<br><i>TPR</i> <sup>b</sup> | G    | A    | 0.06            | 89    | 0.00            | 217   | 0.00  | 1.00  | <sup>a</sup> NM_005807.3<br>MV [G809E] <sup>±</sup><br><sup>a</sup> NM_001127708.1<br>MV [G768E] <sup>±</sup><br><sup>a</sup> NM_001127709.1<br>MV [G716E] <sup>±</sup> |



| # | #chr | start     | end       | gene          | ref. | obs. | WES             |       |                 |       | WTS   |        | Ref. Seq.<br>variant type<br>[AA alteration]                                                                                                                                                                                                                                                                                                                   |
|---|------|-----------|-----------|---------------|------|------|-----------------|-------|-----------------|-------|-------|--------|----------------------------------------------------------------------------------------------------------------------------------------------------------------------------------------------------------------------------------------------------------------------------------------------------------------------------------------------------------------|
|   |      |           |           |               |      |      | tumor           |       | normal          |       | tumor |        |                                                                                                                                                                                                                                                                                                                                                                |
|   |      |           |           |               |      |      | allele<br>freq. | depth | allele<br>freq. | depth | freq. | depth  |                                                                                                                                                                                                                                                                                                                                                                |
|   |      |           |           |               |      |      |                 |       |                 |       |       |        | <sup>a</sup> NM_001127710.1<br>MV [G675E] <sup>±</sup><br><sup>b</sup> NM_003292.2<br>DV [n.d.] <sup>±</sup>                                                                                                                                                                                                                                                   |
| 2 | chr2 | 25358435  | 25358435  | <i>EFR3B</i>  | C    | T    | 0.08            | 85    | 0.00            | 130   | n/a   | 0.00   | NM_014971.1<br>SG [R471*] <sup>±</sup>                                                                                                                                                                                                                                                                                                                         |
| 3 | chr2 | 179989221 | 179989221 | <i>SESTD1</i> | T    | A    | 0.11            | 80    | 0.00            | 99    | 0.56  | 32.00  | NM_178123.4<br>MV [E346V]                                                                                                                                                                                                                                                                                                                                      |
| 4 | chr2 | 209113113 | 209113113 | <i>IDH1</i>   | G    | A    | 0.17            | 36    | 0.00            | 33    | 0.42  | 237.00 | NM_001282386.1;<br>NM_001282387.1;<br>NM_005896.3<br>MV [R132C]                                                                                                                                                                                                                                                                                                |
| 5 | chr5 | 58289248  | 58289248  | <i>PDE4D</i>  | C    | A    | 0.07            | 54    | 0.00            | 48    | 0.20  | 5.00   | NM_001104631.1<br>MV [M322I] <sup>±</sup><br>NM_001197223.1<br>MV [M31I] <sup>±</sup><br>NM_001197221.1<br>MV [M20I] <sup>±</sup><br>NM_001197222.1<br>MV [M98I] <sup>±</sup><br>NM_001197220.1<br>MV [M192I] <sup>±</sup><br>NM_001197219.1<br>MV [M200I] <sup>±</sup><br>NM_006203.4<br>MV [M186I] <sup>±</sup><br>NM_001197218.1<br>MV [M258I] <sup>±</sup> |

| #  | #chr  | start     | end       | gene                              | ref. | obs. | WES             |       |                 |       | WTS   |        | Ref. Seq.<br>variant type<br>[AA alteration]                                                                                                                                                               |
|----|-------|-----------|-----------|-----------------------------------|------|------|-----------------|-------|-----------------|-------|-------|--------|------------------------------------------------------------------------------------------------------------------------------------------------------------------------------------------------------------|
|    |       |           |           |                                   |      |      | tumor           |       | normal          |       | tumor |        |                                                                                                                                                                                                            |
|    |       |           |           |                                   |      |      | allele<br>freq. | depth | allele<br>freq. | depth | freq. | depth  |                                                                                                                                                                                                            |
|    |       |           |           |                                   |      |      |                 |       |                 |       |       |        | NM_001165899.1<br>MV [M261I] <sup>±</sup>                                                                                                                                                                  |
| 6  | chr7  | 99313514  | 99313514  | <i>CYP3A7-CYP3AP1,<br/>CYP3A7</i> | G    | T    | 0.06            | 114   | 0.00            | 111   | 0.15  | 20.00  | NM_001256497.2;<br>NM_000765.4<br>SG [Y179*] <sup>±</sup>                                                                                                                                                  |
| 7  | chr7  | 140710306 | 140710306 | <i>MRPS33</i>                     | G    | A    | 0.06            | 180   | 0.00            | 159   | 0.21  | 292.00 | NM_016071.3;<br>NM_053035.2<br>MV [A43V]                                                                                                                                                                   |
| 8  | chr10 | 6067959   | 6067959   | <i>IL2RA</i>                      | G    | A    | 0.05            | 114   | 0.00            | 249   | 0.00  | 13.00  | NM_000417.2<br>MV [P32S]                                                                                                                                                                                   |
| 9  | chr12 | 55039476  | 55039476  | <i>DCD</i>                        | G    | A    | 0.05            | 111   | 0.00            | 154   | n/a   | 0.00   | NM_001300854.1;<br>NM_053283.3<br>MV [S38L]                                                                                                                                                                |
| 10 | chr14 | 91636435  | 91636435  | <i>C14orf159</i>                  | G    | A    | 0.22            | 23    | 0.00            | 106   | 0.80  | 51.00  | NM_001102368.2;<br>NM_001102366.2;<br>NM_001102369.2;<br>NM_001286470.1;<br>NM_001286472.1;<br>NM_024952.7;<br>NM_001102367.2;<br>NM_001286471.1<br>MV [D116N]<br>NM_001286473.1<br>DV [n.d.] <sup>±</sup> |
| 11 | chr17 | 3101176   | 3101176   | <i>OR1A2</i>                      | C    | T    | 0.14            | 111   | 0.00            | 158   | n/a   | 0.00   | NM_012352.1<br>SG [R122*] <sup>±</sup>                                                                                                                                                                     |
| 12 | chr22 | 17072027  | 17072027  | <i>CCT8L2</i>                     | G    | T    | 0.10            | 63    | 0.00            | 86    | n/a   | 0.00   | NM_014406.4<br>MV [Q472K]                                                                                                                                                                                  |

**Supplementary Table 15: Epitope Prediction of mutated Ligand (P03/13) at first vaccination**

Shown are *in silico* predicted HLA class I peptide ligands (amino acid alterations in peptide sequences are underlined) based on mutations provided in **Suppl. Table 14**. Predictions encompass 9-12mer peptides and have been predicted using dedicated software available before September 2012 previous to starting vaccinations. Further information regarding bioinformatics analyses is given under **Suppl. Material and Methods**. Scoring of putative HLA binding peptides according to the used software algorithms together with predicted HLA alleles matching the patient given in nM for NetMHCpan 2.4 (42, 43) and NetMHC 3.0 (44-46) respectively or % of maximal binding (50% max.) for SYFPEITHI (16). Respective cut offs were predefined at <500nM for NetMHCpan 2.4 and NetMHC 3.0 or >50%max. for SYFPEITHI. As matrices for HLA allele B\*07:05 were not always available closely related HLA allele B\*07:02 was additionally used when available. Further gene identifiers (Gene ID) according to the National Center for Biotechnology Information (NCBI) are listed.

| # | Peptide            | mer | Method        | Score  | HLA     | Gene             |
|---|--------------------|-----|---------------|--------|---------|------------------|
| 1 | EIS <u>H</u> ATFK  | 8   | netMHC 3.0    | 256 nM | A*03:01 | <i>IL2RA</i>     |
|   |                    |     | netMHC 3.0    | 222 nM | B*35:01 |                  |
| 2 | IIIG <u>C</u> HAY  | 8   | netMHCpan 2.4 | 17 nM  | A*29:01 | <i>IDH1</i>      |
|   |                    |     | netMHCpan 2.4 | 119 nM | B*35:01 |                  |
|   |                    |     | netMHC 3.0    | 198 nM | B*35:01 |                  |
| 3 | ALLNAGD <u>V</u> E | 9   | SYFPEITHI     | 52%    | A*03:01 | <i>SESTD1</i>    |
| 4 | DPPEI <u>S</u> HAT | 9   | netMHC 3.0    | 83 nM  | B*35:01 | <i>IL2RA</i>     |
|   |                    |     | SYFPEITHI     | 52%    | B*07:02 |                  |
| 5 | EQLKN <u>M</u> VAF | 9   | netMHCpan 2.4 | 153 nM | B*35:01 | <i>C14orf159</i> |
| 6 | KPIIIG <u>C</u> HA | 9   | netMHC 3.0    | 313 nM | B*07:02 | <i>IDH1</i>      |
|   |                    |     | SYFPEITHI     | 55%    | B*07:02 |                  |
| 7 | NPCHEA <u>L</u> AA | 9   | netMHCpan 2.4 | 238 nM | B*35:01 | <i>DCD</i>       |
|   |                    |     | netMHC 3.0    | 287 nM | B*35:01 |                  |
|   |                    |     | SYFPEITHI     | 58%    | B*07:02 |                  |
| 8 | PIIIG <u>C</u> HAY | 9   | netMHCpan 2.4 | 220 nM | A*29:01 | <i>IDH1</i>      |

| #  | Peptide                        | mer | Method        | Score  | HLA     | Gene             |
|----|--------------------------------|-----|---------------|--------|---------|------------------|
| 9  | PPEI <u>S</u> HATF             | 9   | netMHC 3.0    | 238 nM | B*35:01 | <i>IL2RA</i>     |
|    |                                |     | SYFPEITHI     | 52%    | B*07:02 |                  |
| 10 | DPPEI <u>S</u> HATF            | 10  | netMHC 3.0    | 20 nM  | B*35:01 | <i>IL2RA</i>     |
|    |                                |     | netMHCpan 2.4 | 239 nM | B*35:01 |                  |
|    |                                |     | SYFPEITHI     | 57%    | B*07:02 |                  |
| 11 | E <u>I</u> S <u>H</u> ATFKAM   | 10  | netMHC 3.0    | 256 nM | B*35:01 | <i>IL2RA</i>     |
|    |                                |     | netMHCpan 2.4 | 274 nM | B*35:01 |                  |
| 12 | KLFSELPL <u>V</u> K            | 10  | netMHCpan 2.4 | 18 nM  | A*03:01 | <i>MRPS33</i>    |
|    |                                |     | netMHC 3.0    | 31 nM  | A*03:01 |                  |
|    |                                |     | SYFPEITHI     | 74%    | A*03:01 |                  |
| 13 | KPII <u>G</u> CHAY             | 10  | netMHCpan 2.4 | 19 nM  | B*35:01 | <i>IDH1</i>      |
|    |                                |     | netMHC 3.0    | 24 nM  | B*35:01 |                  |
| 14 | LPL <u>V</u> KKKETY            | 10  | netMHC 3.0    | 75 nM  | B*35:01 | <i>MRPS33</i>    |
|    |                                |     | netMHCpan 2.4 | 120 nM | B*35:01 |                  |
| 15 | NP <u>C</u> HEAL <u>A</u> AQ   | 10  | netMHC 3.0    | 402 nM | B*35:01 | <i>DCD</i>       |
| 16 | <u>S</u> HATFKAMAY             | 10  | netMHCpan 2.4 | 328 nM | A*29:01 | <i>IL2RA</i>     |
| 17 | VMAEMSGV <u>H</u> K            | 10  | netMHC 3.0    | 31 nM  | A*03:01 | <i>CCT8L2</i>    |
|    |                                |     | netMHCpan 2.4 | 79 nM  | A*03:01 |                  |
| 18 | I <u>I</u> G <u>C</u> HAYGDQY  | 11  | netMHCpan 2.4 | 225 nM | A*29:01 | <i>IDH1</i>      |
| 19 | I <u>S</u> HATFKAMAY           | 11  | netMHC 3.0    | 102 nM | A*29:01 | <i>IL2RA</i>     |
|    |                                |     | netMHCpan 2.4 | 209 nM | A*03:01 |                  |
|    |                                |     | netMHCpan 2.4 | 247 nM | B*35:01 |                  |
| 20 | KLFSELPL <u>V</u> KK           | 11  | netMHC 3.0    | 7 nM   | A*03:01 | <i>MRPS33</i>    |
|    |                                |     | netMHCpan 2.4 | 23 nM  | A*03:01 |                  |
| 21 | <u>N</u> MVAFFLGCSF            | 11  | netMHCpan 2.4 | 131 nM | B*35:01 | <i>C14orf159</i> |
| 22 | YSEQLK <u>N</u> MVAF           | 11  | netMHC 3.0    | 86 nM  | B*35:01 | <i>C14orf159</i> |
|    |                                |     | netMHCpan 2.4 | 230 nM | B*35:01 |                  |
| 23 | APGSGNP <u>C</u> HEAL          | 12  | netMHC 3.0    | 30 nM  | B*07:02 | <i>DCD</i>       |
| 24 | E <u>I</u> S <u>H</u> ATFKAMAY | 12  | netMHC 3.0    | 93 nM  | B*35:01 | <i>IL2RA</i>     |
| 25 | I <u>S</u> HATFKAMAYK          | 12  | netMHC 3.0    | 21 nM  | A*03:01 | <i>IL2RA</i>     |
| 26 | KLFSELPL <u>V</u> KKK          | 12  | netMHC 3.0    | 11 nM  | A*03:01 | <i>MRPS33</i>    |
| 27 | PPEI <u>S</u> HATFKAM          | 12  | netMHC 3.0    | 223 nM | B*35:01 | <i>IL2RA</i>     |
|    |                                |     | netMHC 3.0    | 303 nM | B*07:02 |                  |
| 28 | VVKLFSELPL <u>V</u> K          | 12  | netMHC 3.0    | 382 nM | A*03:01 | <i>MRPS33</i>    |
| 29 | WVKPII <u>G</u> CHAY           | 12  | netMHC 3.0    | 37 nM  | B*35:01 | <i>IDH1</i>      |
| 30 | YSEQLK <u>N</u> MVAFF          | 12  | netMHC 3.0    | 233 nM | B*35:01 | <i>C14orf159</i> |

**Supplementary Table 16: Epitope Prediction of mutated Ligands (P03/13) current**

Shown are *in silico* predicted HLA class I peptide ligands (amino acid alterations in peptide sequences are underlined) based on mutations provided in **Suppl. Table 14**. Predictions encompass 9-12mer peptides and have been predicted using respective dedicated currently available software. Further information regarding bioinformatics analyses is given under **Suppl. Material and Methods**. Scoring of putative HLA binding peptides according to the used software algorithms together with predicted HLA alleles matching the patient given in nM for NetMHCpan 2.8 (42, 43) and NetMHC 3.4 (15, 45, 46) respectively or % of maximal binding (50% max.) for SYFPEITHI\* 2015 (in house version). Respective cut offs were predefined at <500nM for NetMHCpan 2.8 and NetMHC 3.4 or >50%max. for SYFPEITHI\*. As matrices for HLA allele B\*07:05 were not always available closely related HLA allele B\*07:02 was additionally used when available. Further gene identifiers (Gene ID) according to the National Center for Biotechnology Information (NCBI) are listed.

| #  | Peptide            | mer | Method        | Score  | HLA     | Gene             |
|----|--------------------|-----|---------------|--------|---------|------------------|
| 1  | AGD <u>V</u> EDLV  | 8   | SYFPEITHI*    | 51%    | C*04:01 | <i>SESTD1</i>    |
| 2  | E <u>I</u> SHATFK  | 8   | netMHC 3.4    | 366 nM | A*03:01 | <i>IL2RA</i>     |
| 3  | IIIG <u>C</u> HAY  | 8   | netMHCpan 2.8 | 13 nM  | A*29:01 | <i>IDH1</i>      |
|    |                    |     | netMHC 3.4    | 65 nM  | B*35:01 |                  |
|    |                    |     | netMHCpan 2.8 | 84 nM  | C*04:01 |                  |
| 4  | LFSEL <u>P</u> LV  | 8   | SYFPEITHI*    | 51%    | C*04:01 | <i>MRPS33</i>    |
| 5  | DPPE <u>I</u> SHAT | 9   | SYFPEITHI*    | 52%    | B*07:02 | <i>IL2RA</i>     |
| 6  | D <u>V</u> EDLVELK | 9   | SYFPEITHI*    | 74%    | A*03:01 | <i>SESTD1</i>    |
| 7  | EQLKNM <u>V</u> AF | 9   | netMHCpan 2.8 | 316 nM | C*04:01 | <i>C14orf159</i> |
| 8  | GD <u>V</u> EDLVEL | 9   | SYFPEITHI*    | 54%    | B*35:01 | <i>SESTD1</i>    |
| 9  | <u>I</u> SHATFKAM  | 9   | netMHCpan 2.8 | 477 nM | C*04:01 | <i>IL2RA</i>     |
| 10 | KLFSEL <u>P</u> LV | 9   | SYFPEITHI*    | 58%    | A*03:01 | <i>MRPS33</i>    |
| 11 | KPIIIG <u>C</u> HA | 9   | SYFPEITHI*    | 55%    | B*07:02 | <i>IDH1</i>      |
| 12 | NPCHEA <u>L</u> AA | 9   | netMHC 3.4    | 412 nM | B*35:01 | <i>DCD</i>       |
|    |                    |     | SYFPEITHI*    | 58%    | B*07:02 |                  |
| 13 | PIIIG <u>C</u> HAY | 9   | netMHCpan 2.8 | 134 nM | A*29:01 | <i>IDH1</i>      |

|    |                        |    |               |        |         |           |
|----|------------------------|----|---------------|--------|---------|-----------|
|    |                        |    | SYFPEITHI*    | 52%    | A*03:01 |           |
| 14 | PLVKKKETY              | 9  | SYFPEITHI*    | 55%    | A*03:01 | MRPS33    |
| 15 | PPEISHATF              | 9  | SYFPEITHI*    | 71%    | B*35:01 | IL2RA     |
| 16 | QYSEQLK <u>N</u> M     | 9  | SYFPEITHI*    | 56%    | C*04:01 | C14orf159 |
| 17 | AGDV <u>E</u> DLVEL    | 10 | SYFPEITHI*    | 56%    | C*04:01 | SESTD1    |
| 18 | DPPEI <u>S</u> HATF    | 10 | netMHCpan 2.8 | 201 nM | C*04:01 | IL2RA     |
|    |                        |    | SYFPEITHI*    | 77%    | B*35:01 |           |
|    |                        |    | SYFPEITHI*    | 57%    | B*07:02 |           |
| 19 | E <u>S</u> HATFKAM     | 10 | netMHCpan 2.8 | 486 nM | C*04:01 | IL2RA     |
| 20 | KLFSELPL <u>V</u> K    | 10 | netMHCpan 2.8 | 13 nM  | A*03:01 | MRPS33    |
|    |                        |    | netMHC 3.4    | 18 nM  | A*03:01 |           |
|    |                        |    | SYFPEITHI*    | 87%    | A*03:01 |           |
| 21 | KPIIG <u>C</u> HAY     | 10 | netMHCpan 2.8 | 31 nM  | C*04:01 | IDH1      |
|    |                        |    | netMHC 3.4    | 34 nM  | B*35:01 |           |
|    |                        |    | SYFPEITHI*    | 81%    | B*35:01 |           |
| 22 | LLPL <u>V</u> KKKETY   | 10 | netMHC 3.4    | 148 nM | B*35:01 | MRPS33    |
|    |                        |    | netMHCpan 2.8 | 277 nM | C*04:01 |           |
|    |                        |    | SYFPEITHI*    | 88%    | B*35:01 |           |
| 23 | <u>S</u> HATFKAMAY     | 10 | netMHCpan 2.8 | 479 nM | A*29:01 | IL2RA     |
| 24 | <u>V</u> EDLVELKSL     | 10 | SYFPEITHI*    | 62%    | C*04:01 | SESTD1    |
| 25 | VMAEMSGV <u>H</u> K    | 10 | netMHCpan 2.8 | 72 nM  | A*03:01 | CCT8L2    |
| 26 | DVMAEMSGV <u>H</u> K   | 11 | SYFPEITHI*    | 69%    | A*03:01 | CCT8L2    |
| 27 | IIG <u>C</u> HAYGDQY   | 11 | netMHCpan 2.8 | 163 nM | A*29:01 | IDH1      |
| 28 | I <u>S</u> HATFKAMAY   | 11 | netMHCpan 2.8 | 79 nM  | C*04:01 | IL2RA     |
|    |                        |    | netMHCpan 2.8 | 80 nM  | A*29:01 |           |
|    |                        |    | netMHC 3.4    | 133 nM | B*35:01 |           |
| 29 | KLFSELPL <u>V</u> KK   | 11 | netMHCpan 2.8 | 14 nM  | A*03:01 | MRPS33    |
|    |                        |    | netMHC 3.4    | 109 nM | A*03:01 |           |
|    |                        |    | SYFPEITHI*    | 88%    | A*03:01 |           |
| 30 | N <u>M</u> VAFFLGCSF   | 11 | netMHCpan 2.8 | 268 nM | C*04:01 | C14orf159 |
|    |                        |    | netMHC 3.4    | 447 nM | B*35:01 |           |
| 31 | PPEI <u>S</u> HATFKA   | 11 | SYFPEITHI*    | 57%    | B*07:02 | IL2RA     |
| 32 | YSEQLK <u>N</u> MVAF   | 11 | netMHC 3.4    | 172 nM | B*35:01 | C14orf159 |
|    |                        |    | netMHCpan 2.8 | 309 nM | C*04:01 |           |
| 33 | APGSGNPC <u>C</u> HEAL | 12 | netMHC 3.4    | 22 nM  | B*07:02 | DCD       |
| 34 | E <u>S</u> HATFKAMAY   | 12 | netMHC 3.4    | 91 nM  | B*35:01 | IL2RA     |
| 35 | IIG <u>C</u> HAYGDQY   | 12 | netMHC 3.4    | 398 nM | B*35:01 | IDH1      |
| 36 | I <u>S</u> HATFKAMAYK  | 12 | netMHC 3.4    | 52 nM  | A*03:01 | IL2RA     |
| 37 | KLFSELPL <u>V</u> KKK  | 12 | netMHC 3.4    | 22 nM  | A*03:01 | MRPS33    |
| 38 | VVKLFSELPL <u>V</u> K  | 12 | netMHC 3.4    | 218 nM | A*03:01 | MRPS33    |
| 39 | VVKPIIG <u>C</u> HAY   | 12 | netMHC 3.4    | 43 nM  | B*35:01 | IDH1      |

**Supplementary Figure 16-21: Comparison mass spectra of immunopeptidome (L06/10) and respective synthetic peptides**

*Analysis of the Major Histocompatibility Complex (MHC) immunopeptidome by uHPLC coupled tandem mass spectrometry*

Mass spectrometric analysis of the HLA Class I ligandome on L06/10 yielded 375 unique peptides (3,811 peptide spectrum matches) (see below) (adjacent liver tissue: 1,169 peptides (19,462 peptide spectrum matches)). Three out of four HLA class I epitopes contained in the vaccine cocktail were confirmed to be presented as natural HLA-ligands on the patient's tumor tissue; GLASFKSFLK (RGS-5)/ TSALPIIQK (ADFP-3)/ SLLTSSKGQLQK (ADFP-2).

Supplementary Figure 16 (RGS-5 peptide immunopeptidome: autologous tumor mass spectrum)

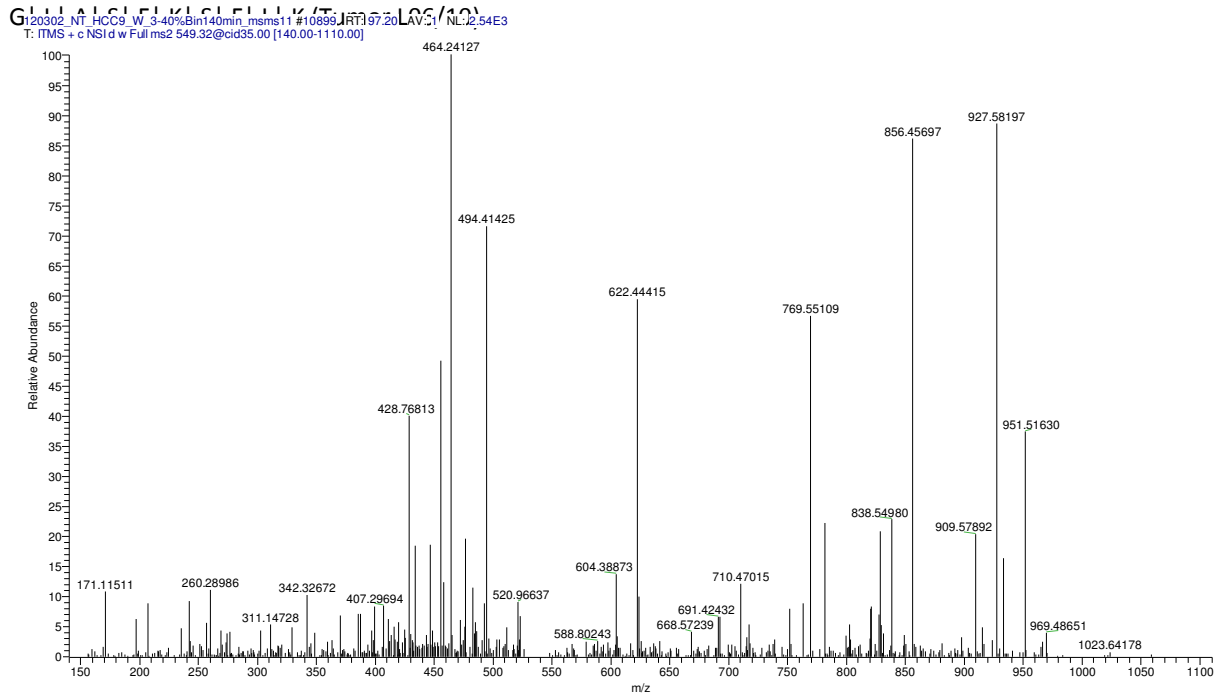

Supplementary Figure 17 (RGS-5 synthetic peptide mass spectrum)

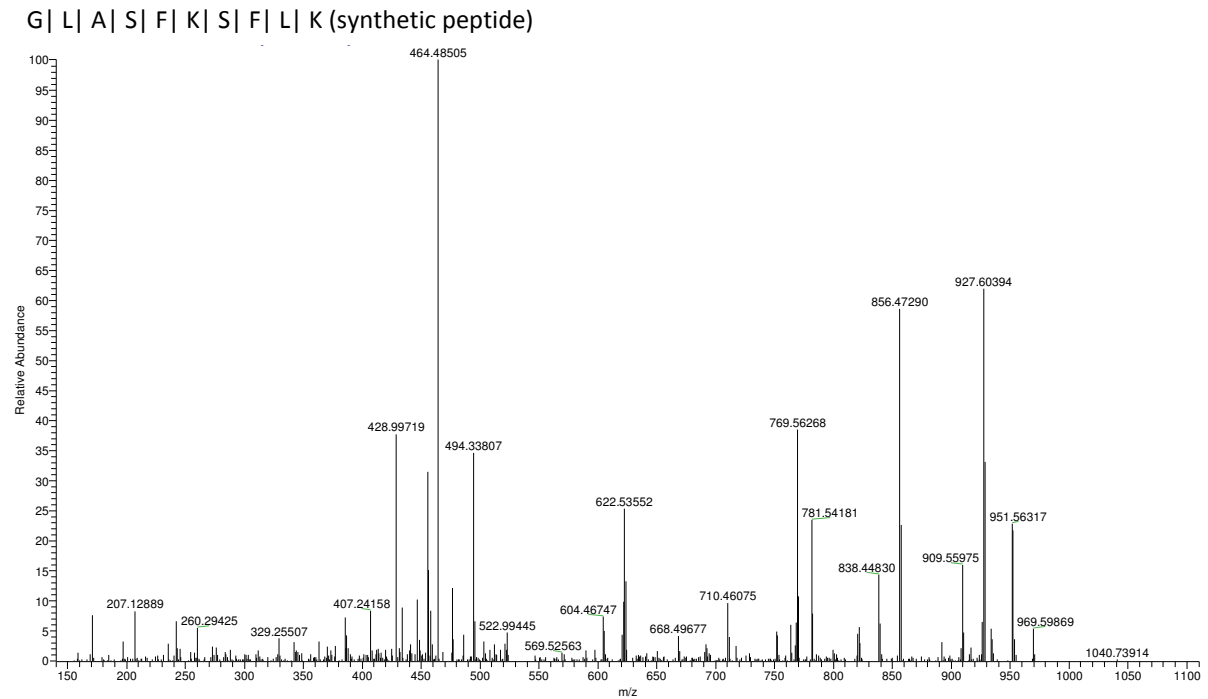



Supplementary Figure 18 (ADFP-3 immunopeptidome: autologous tumor mass spectrum)

T|S|A|L|P|I|I|Q|K (Tumor L06/10)

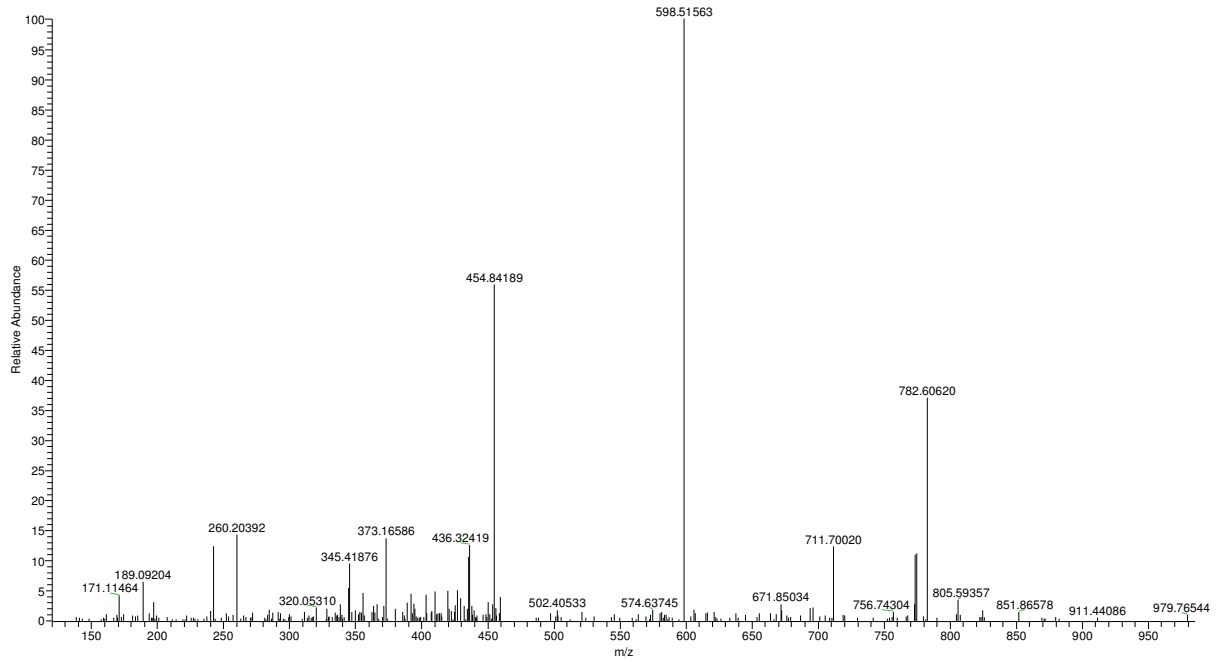

Supplementary Figure 19 (ADFP-3 synthetic peptide mass spectrum)

T|S|A|L|P|I|I|Q|K (synthetic peptide)

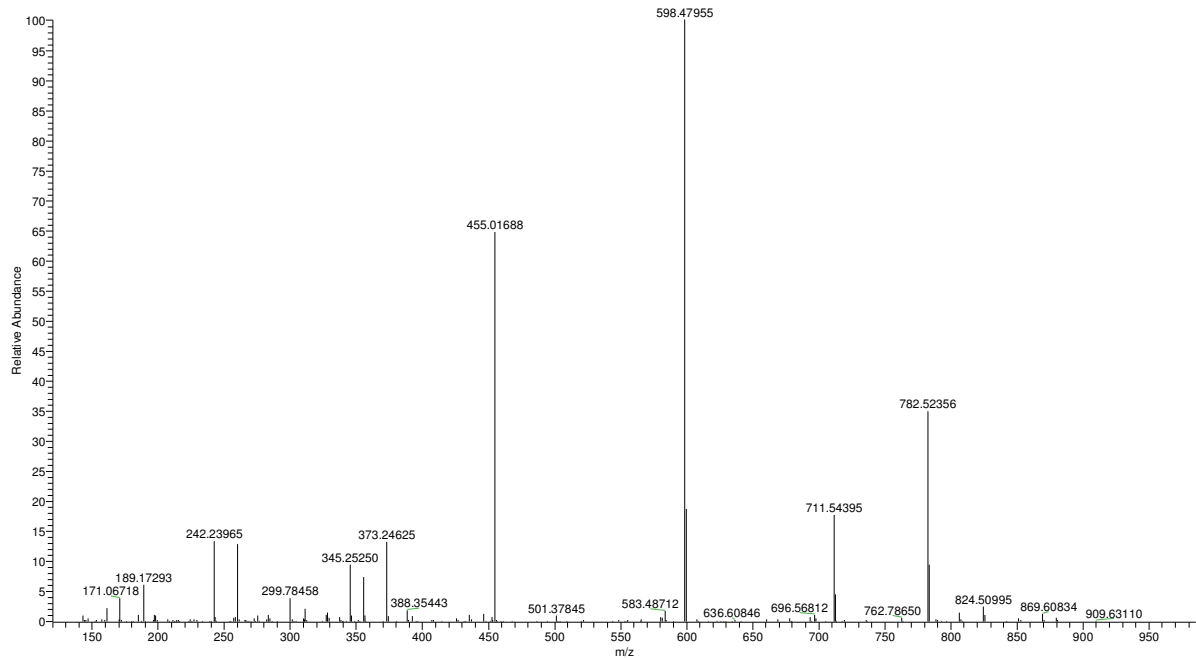

Supplementary Figure 20 (ADFP-2) immunopeptidome: autologous tumor mass spectrum)

S|L|L|T|S|S|K|G|Q|L|Q|K (Tumor L06/10)

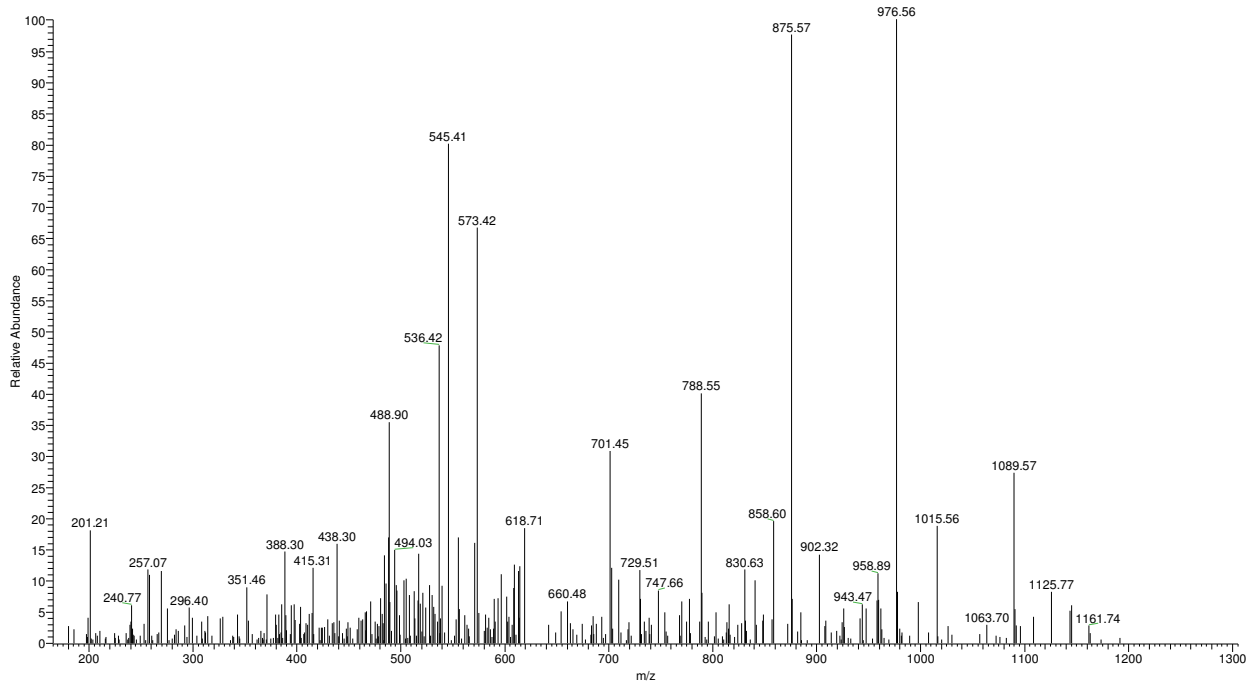

Supplementary Figure 21 (ADFP-2) synthetic peptide mass spectrum)

S|L|L|T|S|S|K|G|Q|L|Q|K (synthetic peptide)

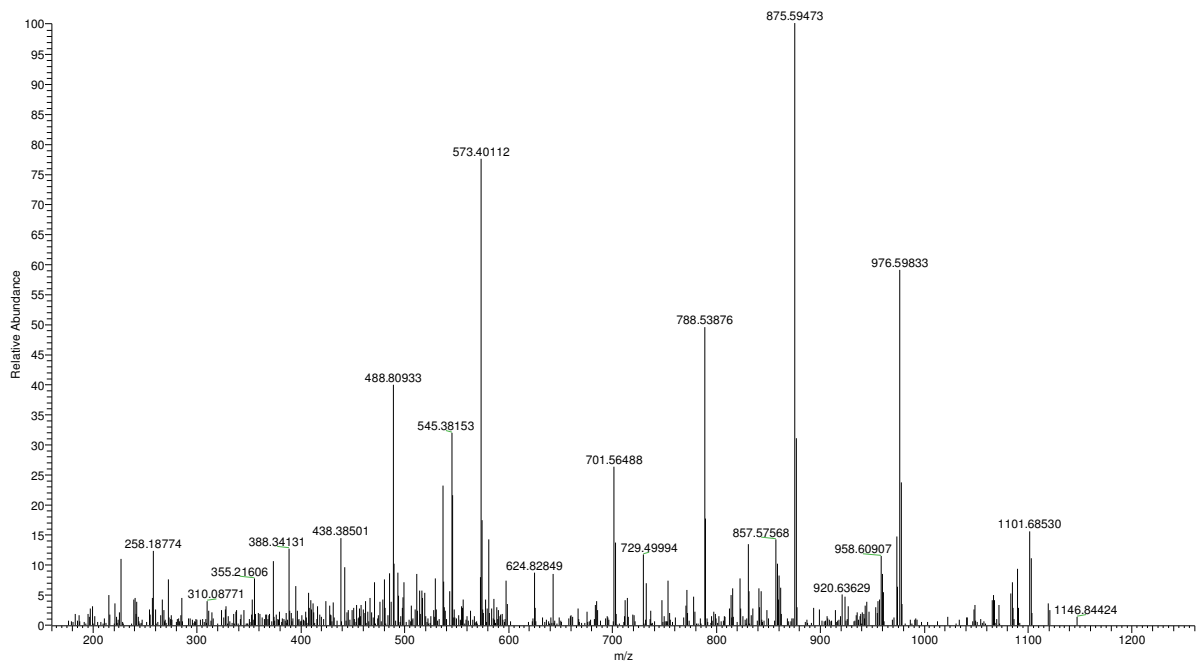

**Supplementary Table 17: L06/10 Immunopeptidome (tumor tissue)**

| #  | Sequence    | # PSMs | # Proteins | Protein Group Accessions    | Mod. (ox) | Area    | q-Value | PEP         | IonScore | Exp. Value  | Ch. | MH+ [Da]   | $\Delta$ M [ppm] | RT [min] |
|----|-------------|--------|------------|-----------------------------|-----------|---------|---------|-------------|----------|-------------|-----|------------|------------------|----------|
| 1  | mPVGPDAILY  | 70     | 1          | P46379                      | M1        | 8,331E7 | 0       | 0,0004028   | 81       | 3,90559E-06 | 2   | 1247,64556 | 0,18             | 113,36   |
| 2  | RVQEAVESMVK | 2      | 1          | Q96C01                      |           | 1,889E7 | 0       | 0,007824    | 78       | 6,71881E-06 | 2   | 1275,67204 | -0,45            | 62,74    |
| 3  | VFVATFLRY   | 127    | 1          | O00767                      |           | 5,690E7 | 0       | 0,000132642 | 73       | 1,40465E-05 | 2   | 1115,62444 | -0,35            | 132,09   |
| 4  | MPVGPDAILRY | 81     | 1          | P46379                      |           | 1,666E8 | 0       | 0,001035    | 72       | 2,83352E-05 | 2   | 1231,65007 | -0,28            | 126,17   |
| 5  | IYADLSLKY   | 74     | 1          | Q9Y320                      |           | 5,009E7 | 0       | 0,0005538   | 70       | 3,48954E-05 | 2   | 1085,58769 | -0,06            | 113,47   |
| 6  | VLSQKVIAH   | 1      | 1          | P49914                      |           | 4,878E6 | 0       | 0,005591    | 68       | 1,50778E-05 | 2   | 994,60430  | -0,14            | 45,54    |
| 7  | AVIVLVENFYK | 38     | 1          | Q96FQ6                      |           | 1,038E7 | 0       | 0,002223    | 67       | 2,8677E-05  | 2   | 1294,74101 | 0,32             | 135,31   |
| 8  | SIGDIFLKY   | 84     | 1          | Q9H8V3                      |           | 2,856E8 | 0       | 0,00232     | 66       | 6,76553E-05 | 2   | 1055,57659 | -0,59            | 139,39   |
| 9  | TPAGVVNKY   | 1      | 1          | Q9UBM7                      |           | 1,255E7 | 0       | 0,01179     | 64       | 0,000146998 | 2   | 948,51750  | 2,70             | 51,79    |
| 10 | ATLEVILRPK  | 2      | 1          | Q9NQT4                      |           | 3,189E6 | 0       | 0,01259     | 63       | 2,95149E-05 | 2   | 1139,71599 | 1,10             | 84,14    |
| 11 | NVIRDAVTY   | 106    | 1          | P62805                      |           | 1,675E9 | 0       | 0,01914     | 63       | 0,000199808 | 2   | 1050,55742 | -0,43            | 80,14    |
| 12 | IPNEIIHAL   | 27     | 1          | P52272                      |           | 7,137E7 | 0       | 0,01284     | 63       | 0,000135869 | 2   | 1019,59081 | 2,31             | 106,09   |
| 13 | YNIQKESTL   | 80     | 4          | P62987;P62979;POCG47;POCG48 |           | 1,211E9 | 0       | 0,005369    | 63       | 0,000188119 | 2   | 1095,56963 | 1,40             | 66,57    |
| 14 | IVALILSTK   | 62     | 1          | P27449                      |           | 8,402E5 | 0       | 0,02427     | 62       | 1,98552E-05 | 2   | 957,63390  | -0,46            | 107,74   |
| 15 | NPNEEVARFY  | 1      | 2          | P14207;P15328               |           | 4,510E6 | 0       | 0,0009627   | 61       | 0,000228239 | 2   | 1238,58318 | 2,51             | 87,25    |
| 16 | FFGETSHNY   | 86     | 1          | P43243                      |           | 4,915E8 | 0       | 0,006809    | 60       | 9,98175E-05 | 2   | 1101,46294 | -0,62            | 75,76    |
| 17 | NAFEVAEKY   | 1      | 1          | O43707                      |           | 3,797E7 | 0       | 0,008389    | 60       | 0,000345799 | 2   | 1070,51897 | 3,39             | 83,20    |

| #  | Sequence    | # PSMs | # Proteins | Protein Group Accessions | Mod. (ox) | Area    | q-Value | PEP      | IonScore | Exp. Value  | Ch. | MH+ [Da]   | ΔM [ppm] | RT [min] |
|----|-------------|--------|------------|--------------------------|-----------|---------|---------|----------|----------|-------------|-----|------------|----------|----------|
| 18 | YSLKVLLSY   | 68     | 1          | P50416                   |           | 2,247E7 | 0       | 0,001692 | 60       | 0,000282864 | 2   | 1085,62419 | 0,05     | 129,62   |
| 19 | APAARFNNSQF | 1      | 1          | Q99967                   |           | 5,873E6 | 0       | 0,02573  | 59       | 0,000530133 | 2   | 1222,59783 | 1,17     | 69,75    |
| 20 | KVYDKAINR   | 1      | 1          | Q6KC79                   |           | 4,810E6 | 0       | 0,005298 | 59       | 0,000222925 | 2   | 1106,63432 | 2,36     | 31,23    |
| 21 | TAADIFKQY   | 1      | 1          | Q8N3U4                   |           | 1,643E7 | 0       | 0,007845 | 59       | 0,000406553 | 2   | 1056,53887 | 2,65     | 96,58    |
| 22 | ALLDGSNVVFK | 34     | 1          | O15212                   |           | 9,182E7 | 0       | 0,006907 | 59       | 0,000396864 | 2   | 1162,64604 | -0,57    | 117,94   |
| 23 | APISLHVSY   | 1      | 1          | Q9BZZ2                   |           | 1,727E7 | 0       | 0,02026  | 59       | 0,000464974 | 2   | 986,53368  | 3,14     | 94,84    |
| 24 | TFDLQRIGF   | 20     | 1          | Q13454                   |           | 1,006E7 | 0       | 0,002194 | 59       | 0,000416636 | 2   | 1096,58257 | 3,60     | 131,57   |
| 25 | SFARLSLTY   | 61     | 1          | Q15904                   |           | 1,896E8 | 0       | 0,01804  | 58       | 0,000610223 | 2   | 1057,56767 | -0,03    | 108,10   |
| 26 | APASALVRIPL | 1      | 1          | P07339                   |           | 3,745E6 | 0       | 0,00826  | 58       | 6,1592E-05  | 2   | 1107,69231 | 3,42     | 117,68   |
| 27 | ALYDKALGY   | 22     | 1          | Q5TAA0                   |           | 1,192E8 | 0       | 0,02003  | 58       | 0,00056772  | 2   | 1013,52983 | -0,41    | 98,98    |
| 28 | RPAPPISGGGY | 2      | 1          | P02675                   |           | 2,615E7 | 0       | 0,003001 | 58       | 0,000573284 | 2   | 1168,61260 | 1,37     | 69,77    |
| 29 | SVAKTILKR   | 20     | 2          | Q9H8S9;Q7L9L4            |           | 3,257E5 | 0       | 0,02647  | 58       | 5,15772E-05 | 2   | 1015,66155 | -0,73    | 34,79    |
| 30 | NVADVVIKF   | 39     | 1          | P04844                   |           | 1,312E8 | 0       | 0,008159 | 58       | 0,000498269 | 2   | 1004,57720 | -0,36    | 124,14   |
| 31 | VLQAADILLYK | 4      | 1          | Q9UGM6                   |           | 1,259E7 | 0       | 0,002853 | 57       | 0,000188188 | 2   | 1246,74443 | 3,07     | 123,89   |
| 32 | SVSDQFYRY   | 53     | 1          | P55010                   |           | 1,097E8 | 0       | 0,005652 | 57       | 0,000690279 | 2   | 1164,53740 | 4,61     | 88,10    |
| 33 | AVAIKAMAK   | 3      | 2          | P63241;Q6IS14            |           | 4,872E7 | 0       | 0,01599  | 57       | 0,000284904 | 2   | 902,54949  | 0,26     | 40,59    |
| 34 | SVAQVLSR    | 16     | 1          | Q92482                   |           | 1,129E8 | 0       | 0,02423  | 57       | 0,00058382  | 2   | 958,56774  | -0,33    | 75,08    |
| 35 | AIDQLHLEY   | 61     | 1          | O43707                   |           | 5,835E8 | 0       | 0,002211 | 56       | 0,001071324 | 2   | 1101,55730 | -0,21    | 110,03   |

| #  | Sequence     | # PSMs | # Proteins | Protein Group Accessions | Mod. (ox) | Area    | q-Value | PEP      | IonScore | Exp. Value  | Ch. | MH+ [Da]   | ΔM [ppm] | RT [min] |
|----|--------------|--------|------------|--------------------------|-----------|---------|---------|----------|----------|-------------|-----|------------|----------|----------|
| 36 | LPSPVTAQKY   | 20     | 1          | P13639                   |           | 1,092E8 | 0       | 0,02165  | 55       | 0,001493953 | 2   | 1103,60918 | -0,36    | 73,53    |
| 37 | KLFDHAVSKF   | 15     | 1          | O60488                   |           | 1,105E8 | 0       | 0,004928 | 55       | 0,001028478 | 2   | 1191,65166 | -0,39    | 66,26    |
| 38 | GVHGGILNK    | 52     | 1          | P60673                   |           | 1,684E9 | 0       | 0,025    | 55       | 0,000630373 | 2   | 894,51543  | -0,22    | 34,37    |
| 39 | RISVAAASK    | 1      | 1          | P28074                   |           | 1,684E7 | 0       | 0,0287   | 54       | 0,001013752 | 2   | 902,54137  | -0,52    | 30,36    |
| 40 | ALFLTITTK    | 16     | 1          | P00403                   |           | 4,884E5 | 0       | 0,01998  | 53       | 0,000296397 | 2   | 1007,61272 | -0,88    | 117,60   |
| 41 | SVFNHAIRH    | 5      | 1          | Q7L576                   |           | 5,062E7 | 0       | 0,01561  | 53       | 0,002075005 | 2   | 1080,57085 | 1,00     | 40,41    |
| 42 | GLFEVGAGWIGK | 1      | 1          | P51659                   |           | 7,035E6 | 0       | 0,00628  | 53       | 0,001943166 | 2   | 1233,66692 | 3,41     | 136,19   |
| 43 | KILDIGLAY    | 16     | 1          | P49754                   |           | 2,281E7 | 0       | 0,01741  | 53       | 0,000779671 | 2   | 1005,59691 | -1,04    | 128,10   |
| 44 | IPATITERY    | 1      | 1          | O15075                   |           | 1,171E7 | 0       | 0,00877  | 53       | 0,002043581 | 2   | 1063,58122 | 2,78     | 76,03    |
| 45 | TFMDHVLRY    | 1      | 1          | P53396                   |           | 3,834E7 | 0       | 0,002752 | 53       | 0,001794864 | 2   | 1181,58049 | 2,76     | 102,70   |
| 46 | FPNIPGKSL    | 15     | 1          | O15121                   |           | 2,121E8 | 0       | 0,02343  | 52       | 0,002460573 | 2   | 972,54869  | -2,72    | 94,63    |
| 47 | APAPSTVHF    | 3      | 1          | Q13118                   |           | 1,133E8 | 0       | 0,01277  | 52       | 0,001504637 | 2   | 926,47527  | 2,36     | 72,70    |
| 48 | SYINFELRY    | 51     | 1          | Q9BZJ0                   |           | 2,914E7 | 0       | 0,00154  | 52       | 0,003055891 | 2   | 1204,59966 | -0,05    | 125,19   |
| 49 | ALASLVSAPK   | 13     | 2          | P55011;Q13621            |           | 1,625E5 | 0       | 0,01319  | 52       | 0,001433343 | 2   | 956,57695  | -0,64    | 81,20    |
| 50 | KLLNYAPLEK   | 6      | 1          | P62875                   |           | 1,114E8 | 0       | 0,008789 | 52       | 0,001205105 | 2   | 1188,69817 | -0,47    | 75,48    |
| 51 | DPDVGNFHY    | 1      | 1          | O15379                   |           | 1,055E7 | 0       | 0,01068  | 52       | 0,001373676 | 2   | 1063,45146 | 3,27     | 95,16    |
| 52 | NVTQVRAFY    | 14     | 1          | P04040                   |           | 3,958E7 | 0       | 0,01702  | 52       | 0,001737742 | 2   | 1097,57695 | 2,82     | 83,38    |
| 53 | EVLGLILRY    | 56     | 1          | P78527                   |           | 1,771E7 | 0       | 0,00264  | 52       | 0,000785608 | 2   | 1075,65093 | -0,12    | 143,31   |

| #  | Sequence    | # PSMs | # Proteins | Protein Group Accessions                                       | Mod. (ox) | Area    | q-Value | PEP      | IonScore | Exp. Value  | Ch. | MH+ [Da]   | ΔM [ppm] | RT [min] |
|----|-------------|--------|------------|----------------------------------------------------------------|-----------|---------|---------|----------|----------|-------------|-----|------------|----------|----------|
| 54 | KIADRFLLY   | 91     | 1          | P61968                                                         |           | 1,161E9 | 0       | 0,007001 | 52       | 0,001113642 | 2   | 1138,66167 | -0,25    | 100,77   |
| 55 | IMLPGVRLRY  | 22     | 1          | O60832                                                         |           | 1,644E7 | 0       | 0,009831 | 52       | 0,001167049 | 2   | 1061,62041 | 2,60     | 124,05   |
| 56 | SSITASLRF   | 35     | 9          | P68363;Q9H853;A6NHL2;Q71U36;Q9BQE3;P68366;Q13748;Q6PEY2;Q9NY65 |           | 7,721E7 | 0       | 0,01526  | 51       | 0,002099281 | 2   | 981,53600  | -0,42    | 101,47   |
| 57 | ILmEHIHKL   | 81     | 1          | P84098                                                         | M3        | 1,170E6 | 0       | 0,02045  | 51       | 0,001361965 | 2   | 1149,64482 | -0,09    | 47,71    |
| 58 | YFDPANGKF   | 38     | 1          | P13639                                                         |           | 7,807E7 | 0       | 0,02192  | 51       | 0,002201027 | 2   | 1058,49358 | -0,60    | 97,82    |
| 59 | NVADLHEKY   | 20     | 1          | P28074                                                         |           | 1,523E8 | 0       | 0,01262  | 51       | 0,004208725 | 2   | 1088,54180 | 4,28     | 53,51    |
| 60 | FLLPIVVRY   | 41     | 1          | Q8TF05                                                         |           | 9,009E6 | 0       | 0,004628 | 50       | 0,000499782 | 2   | 1119,69243 | -0,08    | 151,59   |
| 61 | RPVPPEVAQQY | 1      | 1          | Q6P1N0                                                         |           | 6,629E6 | 0       | 0,01064  | 50       | 0,00274834  | 2   | 1283,67742 | 2,42     | 72,03    |
| 62 | DPLGGSAIHLV | 1      | 1          | P07333                                                         |           | 3,570E6 | 0       | 0,002838 | 50       | 0,003544963 | 2   | 1213,62358 | 1,95     | 119,62   |
| 63 | VSYSHIQSK   | 1      | 1          | P27816                                                         |           | 1,519E7 | 0       | 0,01693  | 50       | 0,004061982 | 2   | 1048,54375 | 1,48     | 31,99    |
| 64 | YPNVNIHNF   | 76     | 1          | Q01082                                                         |           | 2,188E8 | 0       | 0,004369 | 50       | 0,003534404 | 2   | 1117,54265 | 0,10     | 96,38    |
| 65 | VLAPEGSVANK | 1      | 1          | Q13283                                                         |           | 1,737E7 | 0       | 0,02275  | 50       | 0,003128748 | 2   | 1084,60271 | 2,72     | 53,66    |
| 66 | NPVEDKDAVAF | 16     | 3          | P13688;P31997;P40199                                           |           | 9,131E7 | 0       | 0,01202  | 49       | 0,004944626 | 2   | 1204,58403 | -0,40    | 88,21    |
| 67 | ImLPGVRLRY  | 36     | 1          | O60832                                                         | M2        | 9,943E7 | 0       | 0,002583 | 49       | 0,00226304  | 2   | 1077,61601 | 3,20     | 118,80   |
| 68 | AFIHISTAY   | 30     | 1          | Q96K12                                                         |           | 9,232E7 | 0       | 0,01317  | 49       | 0,005465851 | 2   | 1022,53032 | -0,25    | 102,28   |
| 69 | DAARLQAAY   | 1      | 1          | Q01082                                                         |           | 4,846E7 | 0       | 0,02443  | 49       | 0,005510418 | 2   | 978,50017  | -0,20    | 68,25    |
| 70 | LPSEIEVKY   | 23     | 1          | Q9UJX3                                                         |           | 5,808E7 | 0       | 0,005831 | 49       | 0,004344253 | 2   | 1077,58281 | 0,11     | 97,72    |
| 71 | VVYPWTQRF   | 66     | 5          | P68871;P02042;P02100;P69891;P69892                             |           | 9,710E7 | 0       | 0,003099 | 49       | 0,004135558 | 2   | 1195,62566 | -0,20    | 115,60   |

| #  | Sequence    | # PSMs | # Proteins | Protein Group Accessions | Mod. (ox) | Area    | q-Value | PEP      | IonScore | Exp. Value  | Ch. | MH+ [Da]   | ΔM [ppm] | RT [min] |
|----|-------------|--------|------------|--------------------------|-----------|---------|---------|----------|----------|-------------|-----|------------|----------|----------|
| 72 | AVANIVNSVK  | 1      | 1          | Q9BRQ8                   |           | 2,949E6 | 0       | 0,01461  | 49       | 0,004582272 | 2   | 1014,59484 | 0,56     | 69,97    |
| 73 | PSLRILAIGTR | 15     | 1          | Q6P1M3                   |           | 2,543E6 | 0       | 0,025    | 48       | 0,000588776 | 2   | 1196,75090 | 2,90     | 104,70   |
| 74 | RVQEAVESmVK | 2      | 1          | Q96C01                   | M9        | 4,951E6 | 0       | 0,00352  | 48       | 0,008203671 | 2   | 1291,66936 | 1,41     | 43,29    |
| 75 | KITDVIIGF   | 30     | 1          | P35579                   |           | 3,638E7 | 0       | 0,007497 | 48       | 0,002257602 | 2   | 1005,59740 | -0,56    | 139,00   |
| 76 | KVYENYPTY   | 34     | 1          | P35659                   |           | 1,677E8 | 0       | 0,01908  | 48       | 0,005139569 | 2   | 1176,55669 | -0,41    | 71,06    |
| 77 | YEVSQKLD    | 1      | 1          | Q96KP4                   |           | 3,783E7 | 0       | 0,01983  | 48       | 0,00521753  | 2   | 981,49138  | 2,65     | 62,52    |
| 78 | SPAEWGQRL   | 1      | 1          | Q9NPR9                   |           | 1,257E7 | 0       | 0,01252  | 48       | 0,004840486 | 2   | 1043,52971 | 2,67     | 79,17    |
| 79 | FLNDSYLKY   | 33     | 2          | Q8WVM7;Q8N3U4            |           | 3,037E7 | 0       | 0,01198  | 48       | 0,00719722  | 2   | 1162,57817 | 0,22     | 112,17   |
| 80 | ILMEHIHKL   | 32     | 1          | P84098                   |           | 4,160E5 | 0       | 0,01391  | 48       | 0,002460726 | 2   | 1133,64995 | -0,05    | 62,05    |
| 81 | VLRDNIQGITK | 1      | 1          | P62805                   |           | 3,630E6 | 0       | 0,02136  | 48       | 0,003371183 | 2   | 1256,73625 | 3,25     | 62,17    |
| 82 | NSSPLFLHY   | 19     | 1          | Q63HR2                   |           | 1,091E8 | 0       | 0,0206   | 48       | 0,007617103 | 2   | 1077,53618 | -0,20    | 108,79   |
| 83 | VPDSSGPERIL | 20     | 1          | P61978                   |           | 7,165E7 | 0       | 0,0199   | 48       | 0,006033006 | 2   | 1169,62004 | 3,34     | 83,75    |
| 84 | RLFVGSIPK   | 20     | 2          | O60506;O43390            |           | 9,109E8 | 0       | 0,01537  | 47       | 0,002031211 | 2   | 1016,62438 | -0,79    | 69,68    |
| 85 | APVLLSQKF   | 1      | 1          | Q8IY21                   |           | 7,455E6 | 0       | 0,02782  | 47       | 0,002425019 | 2   | 1002,60039 | 2,09     | 96,74    |
| 86 | QTYGQQLQK   | 1      | 1          | P20591                   |           | 1,473E7 | 0       | 0,02011  | 47       | 0,007976071 | 2   | 1093,56499 | 1,20     | 42,43    |
| 87 | HVIDVKFLY   | 106    | 1          | Q16531                   |           | 7,529E7 | 0       | 0,004834 | 47       | 0,006327291 | 2   | 1133,63518 | -0,19    | 111,15   |
| 88 | HPNYPYSDEY  | 32     | 1          | P42330                   |           | 7,847E7 | 0       | 0,02422  | 47       | 0,001358547 | 2   | 1284,51677 | 0,01     | 75,05    |
| 89 | RSYVTTSTR   | 1      | 1          | P08670                   |           | 1,034E7 | 0       | 0,008945 | 47       | 0,005801723 | 2   | 1070,56072 | 1,68     | 29,82    |

| #   | Sequence     | # PSMs | # Proteins | Protein Group Accessions    | Mod. (ox) | Area    | q-Value | PEP      | IonScore | Exp. Value  | Ch. | MH+ [Da]   | ΔM [ppm] | RT [min] |
|-----|--------------|--------|------------|-----------------------------|-----------|---------|---------|----------|----------|-------------|-----|------------|----------|----------|
| 90  | ILNDmVWKY    | 1      | 1          | Q9ULK4                      | M5        | 4,076E6 | 0       | 0,0139   | 47       | 0,007272462 | 2   | 1197,60112 | 3,19     | 105,12   |
| 91  | KLKKTETQEK   | 26     | 3          | P63313;O14604;P62328        |           | 6,074E6 | 0       | 0,005257 | 46       | 0,003613992 | 2   | 1232,72075 | -0,15    | 21,06    |
| 92  | TPALIALRY    | 3      | 4          | P52895;Q04828;P42330;P17516 |           | 1,439E7 | 0       | 0,009127 | 46       | 0,003059072 | 2   | 1017,61211 | 2,88     | 110,18   |
| 93  | FPDKPITQY    | 87     | 1          | P39656                      |           | 3,008E8 | 0       | 0,02301  | 46       | 0,011631075 | 2   | 1108,56719 | -0,17    | 89,16    |
| 94  | SAVDVHINm    | 5      | 1          | P46379                      | M9        | 2,442E7 | 0       | 0,01407  | 46       | 0,007773757 | 2   | 1001,47197 | -0,13    | 67,13    |
| 95  | RTLSDYNIQK   | 1      | 4          | P62987;P62979;POCG47;POCG48 |           | 6,988E6 | 0       | 0,02813  | 46       | 0,009412414 | 2   | 1237,65764 | 3,30     | 54,96    |
| 96  | VTYNGVDNNK   | 1      | 1          | Q16181                      |           | 6,963E6 | 0       | 0,01575  | 45       | 0,012565796 | 2   | 1123,53984 | 1,76     | 40,21    |
| 97  | TPAFFAERL    | 7      | 1          | P50995                      |           | 2,148E7 | 0       | 0,01788  | 45       | 0,009403176 | 2   | 1051,56035 | 3,03     | 109,69   |
| 98  | RIAGQVAAANK  | 1      | 1          | P39019                      |           | 9,127E6 | 0       | 0,00633  | 45       | 0,005855147 | 2   | 1098,63933 | 1,32     | 30,25    |
| 99  | QVDPLSALKY   | 1      | 1          | Q9UL63                      |           | 4,122E6 | 0       | 0,01913  | 45       | 0,011251222 | 2   | 1133,62395 | 3,36     | 116,21   |
| 100 | RSDTPLIYK    | 4      | 1          | P41252                      |           | 5,146E7 | 0       | 0,02754  | 45       | 0,010794989 | 2   | 1092,60454 | -0,26    | 53,57    |
| 101 | IINSSITTK    | 1      | 1          | P49368                      |           | 1,349E8 | 0       | 0,02576  | 45       | 0,00685152  | 2   | 976,56822  | 0,87     | 51,94    |
| 102 | YFSDPFLKY    | 44     | 1          | Q15165                      |           | 6,673E6 | 0       | 0,005473 | 45       | 0,014883852 | 2   | 1179,57219 | 0,07     | 128,30   |
| 103 | IMADIRAQY    | 13     | 1          | P05783                      |           | 2,645E5 | 0       | 0,0108   | 45       | 0,011547402 | 2   | 1080,55071 | 0,01     | 88,19    |
| 104 | RVFSGLVSTGLK | 4      | 1          | P13639                      |           | 2,540E7 | 0       | 0,001831 | 44       | 0,004235324 | 2   | 1263,74578 | 2,98     | 84,61    |
| 105 | RISVSAASK    | 1      | 1          | P28062                      |           | 5,703E7 | 0       | 0,02817  | 44       | 0,009068957 | 2   | 918,53710  | 0,38     | 29,78    |
| 106 | NAFKEITm     | 1      | 1          | Q00403                      | M9        | 2,081E7 | 0       | 0,02277  | 44       | 0,012713533 | 2   | 1070,51836 | -0,34    | 68,53    |
| 107 | FYPELKLAY    | 31     | 2          | Q9UMR2;Q9NUU7               |           | 5,491E7 | 0       | 0,01295  | 44       | 0,014785756 | 2   | 1143,60832 | -0,16    | 127,93   |



| #   | Sequence    | # PSMs | # Proteins | Protein Group Accessions    | Mod. (ox) | Area    | q-Value | PEP      | IonScore | Exp. Value  | Ch. | MH+ [Da]   | ΔM [ppm] | RT [min] |
|-----|-------------|--------|------------|-----------------------------|-----------|---------|---------|----------|----------|-------------|-----|------------|----------|----------|
| 108 | VLLDYHLNY   | 34     | 1          | Q06787                      |           | 6,092E7 | 0       | 0,003115 | 44       | 0,018945097 | 2   | 1149,59355 | -0,30    | 123,74   |
| 109 | VFNEKGWNY   | 12     | 1          | P43490                      |           | 5,202E7 | 0       | 0,01057  | 44       | 0,012404932 | 2   | 1156,54570 | 3,01     | 90,33    |
| 110 | AIITTHLQY   | 24     | 1          | Q96B45                      |           | 1,337E8 | 0       | 0,02876  | 44       | 0,021324574 | 2   | 1059,58306 | -0,27    | 92,51    |
| 111 | QIFVKTLTGK  | 25     | 4          | P62987;P62979;POCG47;POCG48 |           | 2,430E8 | 0       | 0,01116  | 44       | 0,003614351 | 2   | 1134,68779 | -0,33    | 68,26    |
| 112 | AQYSPQQLAGK | 1      | 1          | Q01581                      |           | 2,378E7 | 0       | 0,01099  | 44       | 0,022471835 | 2   | 1190,62139 | 4,14     | 61,86    |
| 113 | ISNPIPIKV   | 1      | 1          | Q92614                      |           | 8,240E6 | 0       | 0,02065  | 44       | 0,002202774 | 2   | 980,61553  | 1,62     | 102,29   |
| 114 | GPGSRISSSSF | 37     | 1          | P05787                      |           | 5,348E8 | 0       | 0,02765  | 44       | 0,01520025  | 2   | 1081,52703 | -0,26    | 58,68    |
| 115 | TVSDAILRY   | 1      | 1          | Q9Y5W9                      |           | 5,589E7 | 0       | 0,01036  | 43       | 0,013926929 | 2   | 1037,56462 | 1,93     | 96,09    |
| 116 | TPLEEAIKF   | 1      | 1          | Q9BXJ9                      |           | 5,689E6 | 0       | 0,01895  | 43       | 0,01453644  | 2   | 1047,57463 | 2,38     | 113,39   |
| 117 | VIYNEQMASK  | 1      | 1          | Q9H8H3                      |           | 5,683E6 | 0       | 0,01225  | 43       | 0,022564524 | 2   | 1182,58464 | 1,91     | 58,12    |
| 118 | IVSSLRLAY   | 26     | 1          | Q9NP61                      |           | 1,123E8 | 0       | 0,01895  | 43       | 0,00669272  | 2   | 1021,60399 | -0,10    | 99,93    |
| 119 | RTQNVLGEK   | 1      | 1          | P23396                      |           | 2,070E7 | 0       | 0,02252  | 43       | 0,018507177 | 2   | 1044,57891 | -0,74    | 29,96    |
| 120 | VFLPIHITY   | 10     | 1          | Q99788                      |           | 2,204E7 | 0       | 0,0244   | 43       | 0,0137483   | 2   | 1102,62883 | -0,67    | 139,98   |
| 121 | FIDASRLVY   | 43     | 2          | P35221;P26232               |           | 1,009E8 | 0       | 0,00229  | 43       | 0,018261169 | 2   | 1083,58269 | -0,62    | 119,06   |
| 122 | AFTDLHLRY   | 16     | 1          | P04114                      |           | 7,399E7 | 0       | 0,01742  | 43       | 0,016694992 | 2   | 1135,59197 | 2,17     | 95,86    |
| 123 | VTFPEFLRY   | 13     | 1          | Q8NCH0                      |           | 3,031E7 | 0       | 0,01765  | 43       | 0,017258717 | 2   | 1171,61443 | -0,20    | 138,94   |
| 124 | RSPDFASSFK  | 1      | 1          | Q99828                      |           | 2,574E7 | 0       | 0,01341  | 43       | 0,019529788 | 2   | 1141,56218 | -1,33    | 64,48    |
| 125 | RIFAPNHVVAK | 1      | 1          | Q02543                      |           | 1,284E7 | 0       | 0,004994 | 43       | 0,006177735 | 2   | 1251,73161 | -0,40    | 48,76    |

| #   | Sequence    | # PSMs | # Proteins | Protein Group Accessions | Mod. (ox) | Area    | q-Value | PEP      | IonScore | Exp. Value  | Ch. | MH+ [Da]   | ΔM [ppm] | RT [min] |
|-----|-------------|--------|------------|--------------------------|-----------|---------|---------|----------|----------|-------------|-----|------------|----------|----------|
| 126 | KIFNVAIPRF  | 1      | 1          | Q9UK99                   |           | 9,344E6 | 0       | 0,02165  | 42       | 0,003205486 | 2   | 1204,72344 | 2,73     | 115,71   |
| 127 | KIWADIPAPK  | 1      | 1          | P49419                   |           | 5,583E6 | 0       | 0,02787  | 42       | 0,007563925 | 2   | 1138,66435 | 2,09     | 84,50    |
| 128 | TIFTARLYY   | 28     | 2          | Q8IUX4;Q9NRW3            |           | 4,705E7 | 0       | 0,01886  | 42       | 0,025030325 | 2   | 1147,61846 | 3,32     | 116,40   |
| 129 | DPFKDILY    | 52     | 1          | Q7L1Q6                   |           | 2,049E6 | 0       | 0,02284  | 42       | 0,017848762 | 2   | 1123,60356 | 0,12     | 155,32   |
| 130 | SPVFTSRSAAF | 1      | 1          | P08729                   |           | 3,089E7 | 0       | 0,007637 | 42       | 0,019794711 | 2   | 1169,59844 | 2,94     | 86,28    |
| 131 | FPSIYDVKY   | 32     | 1          | Q9UFF9                   |           | 4,996E7 | 0       | 0,01364  | 42       | 0,027078793 | 2   | 1131,57524 | 2,77     | 117,86   |
| 132 | FPEEDKITY   | 2      | 1          | O95298                   |           | 3,439E7 | 0       | 0,0126   | 42       | 0,023134765 | 2   | 1156,55193 | -0,17    | 47,99    |
| 133 | RTNEVVAIK   | 1      | 1          | Q7L7X3                   |           | 9,998E6 | 0       | 0,02441  | 42       | 0,019896508 | 2   | 1029,60747 | 2,23     | 40,83    |
| 134 | QLYWVSHPRK  | 11     | 1          | P62273                   |           | 1,070E8 | 0       | 0,008521 | 41       | 0,037871535 | 2   | 1214,64311 | 0,15     | 38,25    |
| 135 | YWNASDLRY   | 1      | 1          | P20929                   |           | 3,416E7 | 0       | 0,005677 | 41       | 0,019650264 | 2   | 1187,55107 | 2,57     | 102,43   |
| 136 | AIAQAESLRYK | 1      | 1          | P23396                   |           | 3,612E6 | 0       | 0,01073  | 41       | 0,020932698 | 2   | 1249,69426 | 3,44     | 58,38    |
| 137 | SPIDVVEKY   | 9      | 1          | Q53G59                   |           | 5,121E7 | 0       | 0,01455  | 41       | 0,028466101 | 2   | 1049,55364 | 2,14     | 97,37    |
| 138 | HGYENPTYK   | 1      | 1          | Q06481                   |           | 1,110E7 | 0       | 0,02756  | 41       | 0,023313427 | 2   | 1108,50810 | 2,07     | 34,88    |
| 139 | SPVNSSKQPSY | 1      | 1          | P05496                   |           | 1,024E7 | 0       | 0,007354 | 41       | 0,031226593 | 2   | 1193,58025 | 0,44     | 44,59    |
| 140 | AFDLTEQRY   | 1      | 1          | Q86UE8                   |           | 2,897E6 | 0       | 0,01551  | 41       | 0,03008209  | 2   | 1142,54924 | 1,35     | 92,69    |
| 141 | VLFEHAVGY   | 1      | 1          | O00567                   |           | 4,124E7 | 0       | 0,02315  | 41       | 0,042488455 | 2   | 1034,53362 | 2,92     | 99,24    |
| 142 | EVYAGSHQY   | 1      | 1          | Q9H3P7                   |           | 5,659E7 | 0       | 0,01348  | 41       | 0,018649422 | 2   | 1053,46391 | 0,29     | 49,75    |
| 143 | RQTGIVLNR   | 1      | 1          | Q13435                   |           | 8,758E6 | 0       | 0,01653  | 40       | 0,019926272 | 2   | 1056,62663 | -0,63    | 44,43    |

| #   | Sequence    | # PSMs | # Proteins | Protein Group Accessions                                                                                 | Mod. (ox) | Area    | q-Value | PEP      | IonScore | Exp. Value  | Ch. | MH+ [Da]   | ΔM [ppm] | RT [min] |
|-----|-------------|--------|------------|----------------------------------------------------------------------------------------------------------|-----------|---------|---------|----------|----------|-------------|-----|------------|----------|----------|
| 144 | LLSPILARY   | 1      | 1          | Q96JH7                                                                                                   |           | 8,507E6 | 0       | 0,02899  | 40       | 0,007150436 | 2   | 1045,64299 | 2,40     | 112,36   |
| 145 | SIFDGRVVAK  | 25     | 1          | Q9UM00                                                                                                   |           | 3,098E8 | 0       | 0,02089  | 40       | 0,025069842 | 2   | 1091,62041 | -0,39    | 75,68    |
| 146 | GVLDTELRY   | 1      | 1          | P18583                                                                                                   |           | 1,543E7 | 0       | 0,02574  | 40       | 0,045717391 | 2   | 1065,55986 | 2,18     | 105,45   |
| 147 | YPVEIHEY    | 30     | 1          | Q13901                                                                                                   |           | 6,595E7 | 0       | 0,01885  | 40       | 0,042735405 | 2   | 1049,49333 | -0,49    | 86,68    |
| 148 | VLYDRVLKY   | 27     | 1          | Q9UHB9                                                                                                   |           | 6,729E7 | 0       | 0,0121   | 40       | 0,021859226 | 2   | 1168,67266 | 0,13     | 88,03    |
| 149 | NLAEDImRL   | 29     | 1          | P08670                                                                                                   | M7        | 3,312E5 | 0       | 0,007073 | 40       | 0,050495036 | 2   | 1090,55571 | -0,44    | 114,27   |
| 150 | AVIEDTWHY   | 36     | 1          | Q15800                                                                                                   |           | 7,221E7 | 0       | 0,01348  | 39       | 0,046293828 | 2   | 1133,52971 | 3,07     | 102,44   |
| 151 | SPNAKEFVY   | 1      | 1          | Q14106                                                                                                   |           | 4,743E6 | 0       | 0,0286   | 39       | 0,05092105  | 2   | 1054,52275 | 2,21     | 74,04    |
| 152 | STVSRFFLY   | 31     | 1          | Q969X6                                                                                                   |           | 6,275E7 | 0       | 0,0267   | 39       | 0,062949608 | 2   | 1119,58599 | 2,35     | 118,67   |
| 153 | DPADIIHDF   | 1      | 1          | Q9NQX7                                                                                                   |           | 4,761E6 | 0       | 0,0162   | 39       | 0,037889772 | 2   | 1042,48772 | 3,52     | 131,97   |
| 154 | DPIERLVSY   | 1      | 1          | Q7LGA3                                                                                                   |           | 1,892E6 | 0       | 0,01837  | 39       | 0,0581567   | 2   | 1091,57598 | 2,55     | 112,03   |
| 155 | VVQDGITLITK | 1      | 1          | P13010                                                                                                   |           | 4,898E6 | 0       | 0,01557  | 39       | 0,023898328 | 2   | 1186,70683 | 2,20     | 94,88    |
| 156 | DPEGRITY    | 2      | 1          | Q9Y530                                                                                                   |           | 6,769E6 | 0       | 0,02166  | 39       | 0,048484619 | 2   | 1037,49004 | 0,18     | 65,72    |
| 157 | ALAEYVIYR   | 3      | 1          | Q9H2K2                                                                                                   |           | 2,032E7 | 0       | 0,01252  | 39       | 0,037000539 | 2   | 1097,60259 | 3,27     | 99,58    |
| 158 | FPRHIEPEL   | 1      | 1          | P86790                                                                                                   |           | 5,757E7 | 0       | 0,01933  | 38       | 0,038986811 | 2   | 1137,60735 | 1,91     | 79,42    |
| 159 | YPSRVFVGDTF | 1      | 1          | Q9H3H5                                                                                                   |           | 3,676E6 | 0       | 0,02652  | 38       | 0,056740581 | 2   | 1287,63945 | 2,01     | 108,48   |
| 160 | KIADFGLAR   | 2      | 14         | P07948;P11362;P21802;P22607;P22455;P09769;P20794;P51451;P06239;Q9UPZ9;P06241;P07947;Q8IZL9;P08631;P50750 |           | 3,113E7 | 0       | 0,01074  | 38       | 0,030571075 | 2   | 990,57543  | 2,30     | 77,40    |

| #   | Sequence     | # PSMs | # Proteins | Protein Group Accessions                                                                          | Mod. (ox) | Area    | q-Value | PEP      | IonScore | Exp. Value  | Ch. | MH+ [Da]   | ΔM [ppm] | RT [min] |
|-----|--------------|--------|------------|---------------------------------------------------------------------------------------------------|-----------|---------|---------|----------|----------|-------------|-----|------------|----------|----------|
| 161 | NPIDHVSFY    | 13     | 1          | Q9Y3Z3                                                                                            |           | 6,697E7 | 0       | 0,01041  | 38       | 0,061055908 | 2   | 1091,51567 | 0,01     | 107,47   |
| 162 | RQIPYTmmK    | 2      | 1          | Q00325                                                                                            | M7;<br>M8 | 2,550E7 | 0       | 0,02618  | 38       | 0,066184118 | 2   | 1199,59392 | 2,28     | 41,05    |
| 163 | YVYEYPSRY    | 27     | 1          | Q14511                                                                                            |           | 4,054E7 | 0       | 0,01391  | 38       | 0,051095523 | 2   | 1239,56792 | -0,12    | 83,63    |
| 164 | NPDDVFREF    | 1      | 1          | O75190                                                                                            |           | 8,903E6 | 0       | 0,01334  | 37       | 0,048036046 | 2   | 1138,51970 | 2,88     | 117,63   |
| 165 | YPDRIMNTF    | 20     | 5          | Q13885;Q9BVA1;P68371;P07437;Q13509                                                                |           | 4,337E7 | 0       | 0,0162   | 37       | 0,053054664 | 2   | 1156,54485 | -0,65    | 104,56   |
| 166 | SLYDRPASY    | 1      | 1          | P16234                                                                                            |           | 2,346E7 | 0       | 0,008717 | 37       | 0,059976111 | 2   | 1071,51323 | 2,48     | 73,34    |
| 167 | RIYGESADAVK  | 1      | 1          | P51114                                                                                            |           | 3,371E7 | 0       | 0,02813  | 37       | 0,068269756 | 2   | 1208,62810 | 0,88     | 44,62    |
| 168 | KVADmALHY    | 7      | 1          | P50990                                                                                            | M5        | 7,125E7 | 0       | 0,02859  | 37       | 0,089903234 | 2   | 1063,52715 | 2,83     | 54,13    |
| 169 | AVYGGFKSK    | 1      | 1          | P00325                                                                                            |           | 3,757E7 | 0       | 0,02317  | 37       | 0,077941463 | 2   | 956,52068  | 0,68     | 40,70    |
| 170 | ILELAGNAARDN | 1      | 14         | P04908;Q93077;P20671;Q96KK5;Q99878;P0C0S8;Q6FI13;Q8IUE6;Q16777;Q7L7L0;Q9BTM1;Q9P0M6;P16104;O75367 |           | 1,487E6 | 0       | 0,005699 | 36       | 0,089012645 | 2   | 1256,66277 | 2,67     | 79,61    |
| 171 | TFmDHVLRV    | 4      | 1          | P53396                                                                                            | M3        | 2,134E7 | 0       | 0,01179  | 36       | 0,069298746 | 2   | 1197,57585 | 3,10     | 77,13    |
| 172 | VPVSTINHAF   | 3      | 1          | O75410                                                                                            |           | 3,499E7 | 0       | 0,01314  | 36       | 0,063201492 | 2   | 1084,58245 | 3,53     | 83,40    |
| 173 | VELDDLKDEL   | 1      | 1          | Q15084                                                                                            |           | 5,624E6 | 0       | 0,01991  | 36       | 0,089568347 | 2   | 1245,62493 | 3,18     | 113,03   |
| 174 | ALPSRILLWK   | 42     | 1          | Q9BRK3                                                                                            |           | 7,094E8 | 0       | 0,01212  | 36       | 0,009930018 | 2   | 1196,75127 | -0,15    | 104,80   |
| 175 | FPSILKVQY    | 1      | 1          | Q15291                                                                                            |           | 2,193E6 | 0       | 0,01929  | 36       | 0,048369603 | 2   | 1191,68083 | 3,00     | 117,69   |
| 176 | KWTDLALQY    | 20     | 1          | Q9BS18                                                                                            |           | 4,733E7 | 0       | 0,02609  | 36       | 0,102717159 | 2   | 1137,59392 | 0,00     | 123,21   |
| 177 | LPAGWILSHL   | 1      | 1          | P10176                                                                                            |           | 8,054E5 | 0       | 0,01048  | 36       | 0,031325356 | 2   | 1106,63835 | 2,36     | 145,43   |

| #   | Sequence    | # PSMs | # Proteins | Protein Group Accessions           | Mod. (ox) | Area    | q-Value | PEP      | IonScore | Exp. Value  | Ch. | MH+ [Da]   | ΔM [ppm] | RT [min] |
|-----|-------------|--------|------------|------------------------------------|-----------|---------|---------|----------|----------|-------------|-----|------------|----------|----------|
| 178 | YVHDDGRVSY  | 1      | 1          | O60234                             |           | 1,427E7 | 0       | 0,01072  | 36       | 0,07011458  | 2   | 1210,54961 | 0,71     | 49,43    |
| 179 | RLSPSPTSQR  | 1      | 1          | P02545                             |           | 1,174E8 | 0       | 0,00835  | 36       | 0,0850875   | 2   | 1128,61406 | 1,79     | 30,47    |
| 180 | KPFDQTTISL  | 9      | 1          | Q15417                             |           | 6,366E5 | 0       | 0,02051  | 36       | 0,105583562 | 2   | 1149,61528 | 0,19     | 108,09   |
| 181 | KTLDQAKAVLK | 1      | 1          | Q9H0A0                             |           | 1,726E6 | 0       | 0,02079  | 36       | 0,025683933 | 2   | 1214,74883 | 1,70     | 48,37    |
| 182 | KVFDGIPPPY  | 9      | 2          | P40429;Q6NVV1                      |           | 9,361E7 | 0       | 0,01271  | 36       | 0,118285218 | 2   | 1132,60796 | 3,70     | 107,88   |
| 183 | KLFDAPLSISK | 1      | 5          | Q9NQA3;C4AMC7;A8K0Z3;Q6VEQ5;A8MWX3 |           | 4,112E6 | 0       | 0,00587  | 35       | 0,05164459  | 2   | 1218,71135 | 1,67     | 98,23    |
| 184 | YYIFIPSKF   | 17     | 1          | Q9H0S4                             |           | 2,052E7 | 0       | 0,01219  | 35       | 0,108864775 | 2   | 1177,63298 | 3,19     | 135,72   |
| 185 | SVYQIKVHR   | 1      | 1          | Q14204                             |           | 1,892E6 | 0       | 0,01174  | 35       | 0,082301875 | 2   | 1129,64800 | 0,28     | 45,71    |
| 186 | RLSYNTASNK  | 1      | 1          | P49207                             |           | 1,327E7 | 0       | 0,01089  | 35       | 0,120945642 | 2   | 1153,59587 | -0,15    | 29,97    |
| 187 | AVYSHVIQKL  | 1      | 1          | P20132                             |           | 1,442E7 | 0       | 0,02426  | 35       | 0,065922643 | 2   | 1157,67156 | 3,29     | 73,68    |
| 188 | AYWNASDLRY  | 1      | 1          | P20929                             |           | 6,166E6 | 0       | 0,01094  | 34       | 0,124954264 | 2   | 1258,58953 | 3,48     | 106,99   |
| 189 | LPIPVDAKVGY | 1      | 1          | Q13615                             |           | 3,185E6 | 0       | 0,01689  | 34       | 0,117138743 | 2   | 1171,67510 | 2,48     | 110,97   |
| 190 | TYAPVAFRY   | 1      | 3          | O60331;A2A3N6;Q99755               |           | 1,509E7 | 0       | 0,02124  | 34       | 0,198773986 | 2   | 1087,55950 | 2,17     | 98,64    |
| 191 | APFQGDQRSL  | 4      | 1          | Q00978                             |           | 3,776E7 | 0       | 0,01676  | 34       | 0,175535943 | 2   | 1118,56011 | 1,03     | 67,29    |
| 192 | SFEQFHLFY   | 2      | 1          | P16885                             |           | 9,649E6 | 0       | 0,005867 | 34       | 0,149673556 | 2   | 1217,56706 | 3,66     | 139,67   |
| 193 | YPFHKQPPTY  | 2      | 1          | Q9BU23                             |           | 1,598E7 | 0       | 0,005553 | 33       | 0,237225869 | 2   | 1277,63494 | 2,81     | 60,60    |
| 194 | VLYNGFTGR   | 1      | 1          | P30876                             |           | 3,050E6 | 0       | 0,02471  | 33       | 0,101194498 | 2   | 1026,53838 | 1,59     | 79,76    |
| 195 | NFDKLSFLY   | 2      | 1          | P53621                             |           | 6,972E6 | 0       | 0,01641  | 33       | 0,212938787 | 2   | 1146,58708 | 3,54     | 132,41   |

| #   | Sequence    | # PSMs | # Proteins | Protein Group Accessions | Mod. (ox) | Area    | q-Value | PEP     | IonScore | Exp. Value  | Ch. | MH+ [Da]   | ΔM [ppm] | RT [min] |
|-----|-------------|--------|------------|--------------------------|-----------|---------|---------|---------|----------|-------------|-----|------------|----------|----------|
| 196 | IPFDPKFITY  | 15     | 1          | Q8N7H5                   |           | 5,652E7 | 0       | 0,02085 | 33       | 0,191398254 | 2   | 1240,66631 | 4,05     | 134,55   |
| 197 | IPIYADKDFV  | 1      | 1          | Q15181                   |           | 3,655E6 | 0       | 0,02755 | 33       | 0,191522904 | 2   | 1180,62688 | 1,67     | 111,39   |
| 198 | KVLDKIVHY   | 1      | 2          | Q2NKQ1;O75897            |           | 1,017E7 | 0       | 0,02058 | 32       | 0,128171203 | 2   | 1114,66191 | -0,03    | 68,38    |
| 199 | RTYLPSQVSR  | 1      | 1          | P35606                   |           | 1,214E7 | 0       | 0,01861 | 32       | 0,185857085 | 2   | 1206,66460 | 4,66     | 55,41    |
| 200 | VPESLAGHSF  | 1      | 1          | P55854                   |           | 2,297E7 | 0       | 0,01183 | 32       | 0,228972554 | 2   | 1130,54949 | 1,57     | 78,39    |
| 201 | FPDPAGKLNQF | 1      | 2          | Q9BT22;Q6GMV1            |           | 7,883E6 | 0       | 0,02564 | 32       | 0,279750886 | 2   | 1233,62895 | 2,14     | 108,01   |
| 202 | KVHAYIISY   | 1      | 1          | Q9H223                   |           | 8,874E6 | 0       | 0,02653 | 31       | 0,109536107 | 2   | 1093,60576 | 1,54     | 78,36    |
| 203 | SFVWHALDY   | 1      | 1          | P49792                   |           | 1,459E7 | 0       | 0,02038 | 31       | 0,312589564 | 2   | 1137,53972 | 2,92     | 123,71   |
| 204 | mPRVQTQQY   | 1      | 1          | O94979                   | M1        | 1,211E6 | 0       | 0,02783 | 31       | 0,268295697 | 2   | 1166,56255 | 0,21     | 45,70    |
| 205 | RWNPLPLSY   | 21     | 1          | Q9UPW6                   |           | 4,813E7 | 0       | 0,0203  | 31       | 0,487737076 | 2   | 1145,61040 | 0,14     | 124,14   |
| 206 | VPTDEARAF   | 1      | 2          | P62491;Q15907            |           | 2,300E5 | 0       | 0,01999 | 30       | 0,435712077 | 2   | 1005,49834 | -1,69    | 68,40    |
| 207 | YFVTGNHEY   | 6      | 1          | Q6ZT21                   |           | 1,821E7 | 0       | 0,01989 | 30       | 0,189415877 | 2   | 1129,49748 | 2,28     | 73,60    |
| 208 | SFAARSFYY   | 14     | 1          | P49327                   |           | 2,267E5 | 0       | 0,01713 | 30       | 0,244407311 | 2   | 1111,52056 | -0,17    | 93,88    |
| 209 | LPQHQPAY    | 1      | 1          | P17535                   |           | 1,079E8 | 0       | 0,02554 | 30       | 0,326283684 | 2   | 1052,55156 | -0,78    | 64,54    |
| 210 | APSLFHLNLT  | 1      | 1          | Q96QB1                   |           | 1,304E7 | 0       | 0,02853 | 30       | 0,239164958 | 2   | 1112,61272 | 2,52     | 122,18   |
| 211 | FFPSIYDVKY  | 8      | 1          | Q9UFF9                   |           | 6,921E6 | 0       | 0,02259 | 30       | 0,447088018 | 2   | 1278,64055 | 0,02     | 137,44   |
| 212 | YSIITPNILR  | 1      | 1          | P01024                   |           | 2,979E6 | 0       | 0,01669 | 29       | 0,202138498 | 2   | 1189,69731 | 2,81     | 118,12   |
| 213 | FPASFPNRQY  | 11     | 1          | Q8TCT9                   |           | 4,412E7 | 0       | 0,02402 | 29       | 0,411411895 | 2   | 1226,59758 | 1,84     | 89,08    |

| #   | Sequence    | # PSMs | # Proteins | Protein Group Accessions | Mod. (ox) | Area    | q-Value | PEP      | IonScore | Exp. Value  | Ch. | MH+ [Da]   | ΔM [ppm] | RT [min] |
|-----|-------------|--------|------------|--------------------------|-----------|---------|---------|----------|----------|-------------|-----|------------|----------|----------|
| 214 | RLFNAIHR    | 1      | 1          | Q15149                   |           | 2,958E6 | 0       | 0,02424  | 29       | 0,131336786 | 2   | 1139,68401 | 3,80     | 69,27    |
| 215 | IPYHSEVPVSL | 19     | 1          | Q01082                   |           | 3,817E8 | 0       | 0,01374  | 29       | 0,455760887 | 2   | 1240,65752 | 0,22     | 107,18   |
| 216 | KLIGEYGLRNK | 1      | 1          | P46781                   |           | 5,265E6 | 0       | 0,01292  | 29       | 0,173222511 | 2   | 1290,75701 | 3,18     | 54,54    |
| 217 | YLNEKAFSY   | 1      | 1          | O60641                   |           | 6,640E6 | 0       | 0,02777  | 28       | 0,696644816 | 2   | 1134,54766 | 0,91     | 88,92    |
| 218 | APFHQLRISY  | 1      | 1          | O60264                   |           | 4,039E6 | 0       | 0,01358  | 28       | 0,544315001 | 2   | 1231,66142 | 2,58     | 85,31    |
| 219 | YPFKPPKQAF  | 1      | 3          | P62837;P61077;Q9Y2X8     |           | 8,120E7 | 0       | 0,01548  | 27       | 0,363806029 | 2   | 1193,67546 | 3,08     | 99,12    |
| 220 | LPYNQQHLY   | 1      | 1          | Q9Y5Q0                   |           | 1,875E7 | 0       | 0,01551  | 27       | 0,811488986 | 2   | 1175,58647 | 1,77     | 78,99    |
| 221 | YVYPKYLKY   | 1      | 1          | Q9BZ29                   |           | 3,808E7 | 0       | 0,01146  | 27       | 0,588791578 | 2   | 1236,66948 | 2,56     | 83,81    |
| 222 | RFDHVITNm   | 2      | 1          | P02746                   | M9        | 1,137E7 | 0       | 0,01788  | 27       | 0,780769964 | 2   | 1148,55559 | 3,34     | 60,02    |
| 223 | FAVDLEHHSY  | 1      | 1          | Q01780                   |           | 6,471E6 | 0       | 0,01914  | 26       | 0,717340546 | 2   | 1217,56023 | 1,34     | 85,35    |
| 224 | IPIERLYVTY  | 5      | 1          | P49588                   |           | 1,242E7 | 0       | 0,00724  | 26       | 0,459335087 | 2   | 1266,71294 | 2,89     | 116,44   |
| 225 | MPAVKAIHQY  | 2      | 1          | P37268                   |           | 6,500E6 | 0       | 0,02423  | 26       | 0,893462026 | 2   | 1296,70439 | 1,77     | 112,31   |
| 226 | FYSEVHPHY   | 5      | 1          | Q9BRR6                   |           | 3,146E7 | 0       | 0,02666  | 26       | 0,655101578 | 2   | 1178,52715 | 0,51     | 64,07    |
| 227 | RQIPYTMK    | 1      | 1          | Q00325                   |           | 5,336E6 | 0       | 0,01725  | 25       | 1,682820378 | 2   | 1167,60613 | 4,09     | 63,82    |
| 228 | RQYENFINR   | 1      | 1          | O60437                   |           | 3,436E6 | 0       | 0,01165  | 25       | 1,30598054  | 2   | 1239,62847 | 4,46     | 59,34    |
| 229 | YYSNKAYQY   | 1      | 1          | Q6P9H5                   |           | 3,679E7 | 0       | 0,01699  | 25       | 0,815266813 | 2   | 1199,53911 | 1,97     | 59,92    |
| 230 | TPLSQAIHQY  | 1      | 1          | Q9NQS7                   |           | 7,076E6 | 0       | 0,01135  | 24       | 1,253531607 | 2   | 1270,68218 | 2,47     | 98,70    |
| 231 | VVYSGLENIKK | 1      | 1          | Q9HBL8                   |           | 5,186E6 | 0       | 0,009705 | 24       | 0,848896004 | 2   | 1249,71623 | 0,90     | 67,33    |

| #   | Sequence    | # PSMs | # Proteins | Protein Group Accessions           | Mod. (ox) | Area    | q-Value | PEP     | IonScore | Exp. Value  | Ch. | MH+ [Da]   | ΔM [ppm] | RT [min] |
|-----|-------------|--------|------------|------------------------------------|-----------|---------|---------|---------|----------|-------------|-----|------------|----------|----------|
| 232 | KLIKDGLIIRK | 2      | 1          | P84098                             |           | 3,958E7 | 0       | 0,01687 | 23       | 0,015706089 | 2   | 1296,87639 | 2,89     | 56,96    |
| 233 | YPDRImNTF   | 11     | 5          | Q13885;Q9BVA1;P68371;P07437;Q13509 | M6        | 8,527E7 | 0       | 0,02364 | 23       | 1,842428776 | 2   | 1172,54228 | 1,51     | 85,71    |
| 234 | LPDEIYHVY   | 2      | 1          | Q9BV86                             |           | 2,257E7 | 0       | 0,01657 | 23       | 2,373228755 | 2   | 1148,56584 | 3,11     | 106,97   |
| 235 | YFELVQHEY   | 1      | 1          | P21580                             |           | 4,817E6 | 0       | 0,01143 | 22       | 2,155694913 | 2   | 1227,57182 | 3,05     | 105,10   |
| 236 | EAFREHQQY   | 1      | 1          | Q96J88                             |           | 3,111E7 | 0       | 0,02638 | 21       | 2,502083317 | 2   | 1207,55034 | 1,03     | 40,95    |
| 237 | VYDLLKTNL   | 1      | 1          | Q99460                             |           | 5,565E6 | 0,001   | 0,03446 | 52       | 0,001202743 | 2   | 1078,61846 | 3,83     | 113,15   |
| 238 | VPHSIINGY   | 16     | 2          | Q8NHW5;P05388                      |           | 6,221E5 | 0,001   | 0,03406 | 51       | 0,003034349 | 2   | 999,52501  | -0,82    | 80,21    |
| 239 | KTLDHVLTH   | 1      | 1          | Q9BTW9                             |           | 9,545E6 | 0,001   | 0,03648 | 51       | 0,002680802 | 2   | 1063,58989 | 0,37     | 42,62    |
| 240 | KIGDFGLTK   | 3      | 2          | O60674;P23458                      |           | 3,521E5 | 0,001   | 0,03591 | 51       | 0,002047457 | 2   | 978,56145  | -0,47    | 70,69    |
| 241 | AVAAVAARR   | 1      | 1          | Q14697                             |           | 3,428E6 | 0,001   | 0,03909 | 50       | 0,001681852 | 2   | 884,54436  | 2,08     | 28,87    |
| 242 | GLASFKSFLK  | 3      | 1          | O15539                             |           | 5,876E7 | 0,001   | 0,02945 | 49       | 0,00228778  | 2   | 1097,63786 | 2,24     | 97,20    |
| 243 | KVAVATPAK   | 1      | 1          | P19338                             |           | 4,508E6 | 0,001   | 0,03087 | 48       | 0,002053328 | 2   | 884,55528  | -1,30    | 29,44    |
| 244 | STNNWVLIK   | 1      | 1          | O14617                             |           | 6,576E6 | 0,001   | 0,04381 | 47       | 0,006628142 | 2   | 1074,59636 | 1,95     | 96,18    |
| 245 | APPPPAHAL   | 2      | 1          | Q96RK1                             |           | 1,203E9 | 0,001   | 0,03952 | 47       | 0,00255727  | 2   | 870,48375  | 0,56     | 51,74    |
| 246 | VFDEAIRAV   | 7      | 3          | P63000;P15153;P60763               |           | 1,016E5 | 0,001   | 0,03314 | 47       | 0,009201701 | 2   | 1019,55150 | -0,57    | 104,03   |
| 247 | LPDTLKVTY   | 24     | 1          | P05107                             |           | 8,663E7 | 0,001   | 0,04315 | 44       | 0,008910269 | 2   | 1049,58745 | -0,31    | 102,19   |
| 248 | YPVDLGDKF   | 1      | 1          | P52434                             |           | 1,207E7 | 0,001   | 0,03676 | 44       | 0,014925366 | 2   | 1053,52837 | 3,02     | 105,06   |
| 249 | SVNLKVSPK   | 1      | 1          | O75475                             |           | 7,953E6 | 0,001   | 0,04293 | 44       | 0,009642509 | 2   | 971,58806  | -0,40    | 44,93    |



| #   | Sequence    | # PSMs | # Proteins | Protein Group Accessions | Mod. (ox) | Area    | q-Value | PEP     | IonScore | Exp. Value  | Ch. | MH+ [Da]   | ΔM [ppm] | RT [min] |
|-----|-------------|--------|------------|--------------------------|-----------|---------|---------|---------|----------|-------------|-----|------------|----------|----------|
| 250 | NAIHAILLY   | 2      | 1          | P50416                   |           | 1,230E7 | 0,001   | 0,03796 | 44       | 0,010684719 | 2   | 1027,59282 | -0,68    | 115,86   |
| 251 | NAAKVFNLY   | 1      | 1          | Q16555                   |           | 2,926E7 | 0,001   | 0,03247 | 43       | 0,013936875 | 2   | 1039,55925 | 2,03     | 96,48    |
| 252 | KIGEVSSPK   | 1      | 1          | P35251                   |           | 1,659E7 | 0,001   | 0,04276 | 43       | 0,022422799 | 2   | 944,54137  | 0,21     | 32,07    |
| 253 | SIIDVYHKY   | 1      | 1          | P05109                   |           | 7,602E6 | 0,001   | 0,02921 | 42       | 0,031334174 | 2   | 1137,59551 | 1,41     | 84,91    |
| 254 | VFDKTLAEL   | 1      | 1          | Q6VMQ6                   |           | 4,335E7 | 0,001   | 0,03098 | 42       | 0,016101296 | 2   | 1035,57390 | 1,70     | 107,62   |
| 255 | AVmGAYVLLK  | 2      | 1          | Q9BY50                   | M3        | 5,271E6 | 0,001   | 0,03823 | 42       | 0,011600163 | 2   | 1080,61162 | -0,57    | 92,04    |
| 256 | VKKAALVIQQ  | 1      | 1          | Q99715                   |           | 9,581E4 | 0,001   | 0,03374 | 42       | 0,00346448  | 2   | 1097,70342 | -0,68    | 97,94    |
| 257 | GLLDVGLRY   | 2      | 1          | Q4AC94                   |           | 1,405E7 | 0,001   | 0,03195 | 42       | 0,020779396 | 2   | 1005,57555 | 2,73     | 125,94   |
| 258 | KPSLPFTSL   | 6      | 1          | P31785                   |           | 9,883E7 | 0,001   | 0,04251 | 41       | 0,027360559 | 2   | 989,56633  | -0,32    | 112,49   |
| 259 | TPYGGQFERm  | 1      | 1          | Q9NR30                   | M10       | 3,773E6 | 0,001   | 0,03331 | 41       | 0,018820914 | 2   | 1201,53459 | 3,25     | 63,25    |
| 260 | SLGVAALYK   | 1      | 1          | P09669                   |           | 9,610E6 | 0,001   | 0,03818 | 41       | 0,014073547 | 2   | 921,54277  | 2,54     | 88,05    |
| 261 | SPMSADRVVAF | 2      | 2          | P10589;P24468            |           | 1,030E7 | 0,001   | 0,03299 | 40       | 0,04380575  | 2   | 1179,58586 | 2,65     | 98,13    |
| 262 | RPAPVEVTY   | 43     | 1          | Q93096                   |           | 6,234E8 | 0,001   | 0,04174 | 40       | 0,051912263 | 2   | 1031,55156 | -0,48    | 70,96    |
| 263 | ALYGVVNVK   | 1      | 1          | O94952                   |           | 1,292E7 | 0,001   | 0,03005 | 40       | 0,022283322 | 2   | 962,56822  | 1,29     | 84,17    |
| 264 | ALKNPPINTK  | 6      | 1          | O15511                   |           | 8,171E7 | 0,001   | 0,04242 | 39       | 0,014624623 | 2   | 1095,65203 | -0,09    | 39,74    |
| 265 | IPIAGRDIITY | 1      | 3          | Q9P1U1;Q9C0K3;P61158     |           | 2,251E7 | 0,001   | 0,03711 | 38       | 0,055606503 | 2   | 1118,62236 | 1,68     | 97,26    |
| 266 | AVNAHSNILK  | 6      | 1          | Q16891                   |           | 5,693E7 | 0,001   | 0,03976 | 38       | 0,036270272 | 2   | 1066,59966 | -0,71    | 38,96    |
| 267 | VLAALRLQY   | 1      | 1          | Q9HD67                   |           | 5,762E4 | 0,001   | 0,03855 | 37       | 0,020938857 | 2   | 1046,63506 | -0,64    | 111,87   |

| #   | Sequence    | # PSMs | # Proteins | Protein Group Accessions | Mod. (ox) | Area    | q-Value | PEP     | IonScore | Exp. Value  | Ch. | MH+ [Da]   | $\Delta$ M [ppm] | RT [min] |
|-----|-------------|--------|------------|--------------------------|-----------|---------|---------|---------|----------|-------------|-----|------------|------------------|----------|
| 268 | SVMRLTISY   | 10     | 1          | Q16665                   |           | 4,613E5 | 0,001   | 0,04377 | 37       | 0,060524282 | 2   | 1069,57060 | -0,45            | 106,48   |
| 269 | LPQGIVREL   | 10     | 1          | P63272                   |           | 6,906E7 | 0,001   | 0,03158 | 37       | 0,022722218 | 2   | 1024,61785 | 2,77             | 96,24    |
| 270 | RAYPHVFTK   | 1      | 1          | O14949                   |           | 5,811E6 | 0,001   | 0,03262 | 36       | 0,083618525 | 2   | 1118,61125 | 0,61             | 44,62    |
| 271 | TSFDKFKYK   | 1      | 1          | P45985                   |           | 9,712E6 | 0,001   | 0,04366 | 36       | 0,085394087 | 2   | 1198,58049 | 2,14             | 84,99    |
| 272 | RSADLTGLEK  | 1      | 1          | Q13751                   |           | 2,151E6 | 0,001   | 0,03947 | 36       | 0,124508541 | 2   | 1089,59209 | 1,99             | 51,59    |
| 273 | KIKEHVRSK   | 1      | 1          | O15205                   |           | 2,794E6 | 0,001   | 0,0304  | 36       | 0,015033313 | 2   | 1124,68938 | -0,46            | 18,19    |
| 274 | KNLSSVRQVK  | 1      | 1          | Q9UBE8                   |           | 1,507E5 | 0,001   | 0,0397  | 35       | 0,032815579 | 2   | 1158,69902 | 3,14             | 59,10    |
| 275 | VPVWIIHYY   | 1      | 1          | O95139                   |           | 2,795E6 | 0,001   | 0,04286 | 35       | 0,106676396 | 2   | 1189,64324 | 2,33             | 134,58   |
| 276 | MTHNLLLNLY  | 10     | 2          | Q92769;Q13547            |           | 2,588E5 | 0,001   | 0,03841 | 35       | 0,132655477 | 2   | 1118,56609 | -0,21            | 103,52   |
| 277 | SWIQNVDTKY  | 1      | 1          | P04114                   |           | 1,644E7 | 0,001   | 0,03992 | 35       | 0,125746105 | 2   | 1253,61858 | 1,97             | 97,64    |
| 278 | SPEPGQRTF   | 1      | 1          | O14867                   |           | 9,168E6 | 0,001   | 0,02959 | 35       | 0,129753835 | 2   | 1018,49578 | 0,48             | 50,52    |
| 279 | AIQNPTmINK  | 2      | 1          | Q02086                   | M7        | 1,371E7 | 0,001   | 0,03822 | 35       | 0,160328746 | 2   | 1145,60295 | 3,99             | 55,14    |
| 280 | KVAENVIRQK  | 1      | 1          | Q6ZSC3                   |           | 6,155E6 | 0,001   | 0,03541 | 34       | 0,050429061 | 2   | 1184,71221 | 0,98             | 30,13    |
| 281 | HPLYPFNDPY  | 16     | 1          | P14550                   |           | 2,339E7 | 0,001   | 0,03894 | 34       | 0,112814089 | 2   | 1262,58391 | -0,13            | 113,20   |
| 282 | RVFVVGmTK   | 3      | 1          | P22307                   | M9        | 6,331E6 | 0,001   | 0,03146 | 34       | 0,059114494 | 2   | 1208,68242 | 0,29             | 68,02    |
| 283 | YVANEFLKY   | 6      | 1          | Q14314                   |           | 2,763E7 | 0,001   | 0,03585 | 34       | 0,16415525  | 2   | 1146,58672 | 3,23             | 104,41   |
| 284 | SVYSGIRHK   | 1      | 1          | Q14642                   |           | 8,551E6 | 0,001   | 0,03425 | 34       | 0,139103092 | 2   | 1046,57634 | 2,06             | 28,93    |
| 285 | LPAKDIQTNVY | 3      | 1          | P48556                   |           | 1,208E8 | 0,001   | 0,03277 | 34       | 0,163744746 | 2   | 1261,68169 | 2,35             | 77,64    |

| #   | Sequence   | # PSMs | # Proteins | Protein Group Accessions                         | Mod. (ox) | Area    | q-Value | PEP     | IonScore | Exp. Value  | Ch. | MH+ [Da]   | ΔM [ppm] | RT [min] |
|-----|------------|--------|------------|--------------------------------------------------|-----------|---------|---------|---------|----------|-------------|-----|------------|----------|----------|
| 286 | YPFKPPKVT  | 4      | 3          | Q969T4;P51965;Q96LR5                             |           | 3,085E8 | 0,001   | 0,02904 | 34       | 0,090006128 | 2   | 1223,68559 | 2,65     | 99,61    |
| 287 | FPEHIFPAL  | 1      | 1          | P61160                                           |           | 0,000E0 | 0,001   | 0,04136 | 33       | 0,157158191 | 2   | 1070,56999 | 2,80     | 133,78   |
| 288 | FPFEKGSVQY | 3      | 1          | P35659                                           |           | 5,689E7 | 0,001   | 0,02996 | 33       | 0,190413151 | 2   | 1201,59294 | 3,41     | 99,22    |
| 289 | RQTATQLLK  | 1      | 1          | P62424                                           |           | 2,079E7 | 0,001   | 0,03672 | 33       | 0,112606448 | 2   | 1058,63213 | 0,39     | 41,09    |
| 290 | HISPNAIFK  | 1      | 1          | P48436                                           |           | 4,282E6 | 0,001   | 0,03476 | 32       | 0,139688372 | 2   | 1026,57329 | 0,15     | 69,92    |
| 291 | RIHGSPLQK  | 1      | 1          | O00566                                           |           | 1,068E7 | 0,001   | 0,03331 | 32       | 0,08694361  | 2   | 1035,60625 | 0,40     | 28,31    |
| 292 | IPQKFIVDY  | 2      | 1          | P55774                                           |           | 1,707E7 | 0,001   | 0,04132 | 32       | 0,192847563 | 2   | 1122,62261 | 2,85     | 103,02   |
| 293 | KFYNGLLFY  | 1      | 1          | Q2M389                                           |           | 1,607E5 | 0,001   | 0,03816 | 32       | 0,288663385 | 2   | 1164,60918 | 0,30     | 132,86   |
| 294 | IQNDRQLQY  | 1      | 1          | Q9UBB9                                           |           | 5,532E7 | 0,001   | 0,04185 | 32       | 0,283655881 | 2   | 1177,59892 | 2,45     | 58,85    |
| 295 | LSQNRVAEF  | 1      | 1          | P48556                                           |           | 4,070E6 | 0,001   | 0,03737 | 32       | 0,293138169 | 2   | 1063,55559 | 2,31     | 66,57    |
| 296 | VVYTSHLQK  | 1      | 7          | PODJD0;P49792;PODJD1;A6NKT7;Q7Z3J3;Q99666;O14715 |           | 5,611E6 | 0,001   | 0,04094 | 31       | 0,218765017 | 2   | 1187,67815 | -0,14    | 65,88    |
| 297 | FPYGDASKF  | 1      | 5          | P61601;P37235;P62760;P84074;Q9UM19               |           | 8,176E6 | 0,001   | 0,03591 | 31       | 0,222107034 | 2   | 1031,48454 | 1,20     | 93,55    |
| 298 | SLLHLGALY  | 11     | 1          | O00767                                           |           | 4,640E7 | 0,001   | 0,03025 | 31       | 0,229909111 | 2   | 986,56975  | 2,82     | 123,98   |
| 299 | ASFDKAKLK  | 1      | 1          | P63313                                           |           | 2,135E7 | 0,001   | 0,0418  | 31       | 0,143028471 | 2   | 1007,58867 | 0,21     | 33,32    |
| 300 | TPEEKIREY  | 1      | 1          | Q14103                                           |           | 1,526E7 | 0,001   | 0,03576 | 30       | 0,414407173 | 2   | 1164,59099 | 1,22     | 49,22    |
| 301 | KVTEGSFVYK | 3      | 1          | P50395                                           |           | 4,554E7 | 0,001   | 0,03561 | 30       | 0,322492676 | 2   | 1157,62444 | 3,71     | 55,32    |
| 302 | SVLDSFLKY  | 2      | 1          | Q96JI7                                           |           | 3,129E7 | 0,001   | 0,0299  | 30       | 0,321919233 | 2   | 1071,57536 | 3,03     | 139,76   |
| 303 | Y AidNPLHY | 14     | 1          | A5YKK6                                           |           | 3,052E7 | 0,001   | 0,04353 | 30       | 0,402853429 | 2   | 1105,53105 | -0,22    | 109,45   |

| #   | Sequence     | # PSMs | # Proteins | Protein Group Accessions | Mod. (ox) | Area    | q-Value | PEP     | IonScore | Exp. Value  | Ch. | MH+ [Da]   | ΔM [ppm] | RT [min] |
|-----|--------------|--------|------------|--------------------------|-----------|---------|---------|---------|----------|-------------|-----|------------|----------|----------|
| 304 | KTQDYVVGf    | 1      | 1          | O14530                   |           | 3,805E6 | 0,001   | 0,03125 | 30       | 0,267447782 | 2   | 1056,53777 | 1,61     | 93,90    |
| 305 | NFTEVHPDY    | 8      | 1          | P04040                   |           | 4,020E7 | 0,001   | 0,04228 | 30       | 0,280601581 | 2   | 1121,49211 | 2,03     | 79,34    |
| 306 | KTKEAVLLK    | 1      | 1          | P36578                   |           | 2,825E6 | 0,001   | 0,03828 | 29       | 0,025648868 | 2   | 1142,75273 | 1,71     | 51,95    |
| 307 | YPLIHfY      | 1      | 2          | Q9H930;P23497            |           | 2,065E6 | 0,001   | 0,03143 | 29       | 0,615390116 | 2   | 1033,53789 | 2,48     | 126,91   |
| 308 | LPLEEAYRF    | 1      | 1          | Q9H223                   |           | 8,051E6 | 0,001   | 0,03919 | 29       | 0,459921373 | 2   | 1137,59697 | 2,67     | 113,31   |
| 309 | ALYETPTGWK   | 1      | 1          | P36871                   |           | 3,931E6 | 0,001   | 0,03643 | 29       | 0,555639835 | 2   | 1165,59197 | 2,68     | 90,71    |
| 310 | HPRIITEGF    | 1      | 1          | P40227                   |           | 5,329E7 | 0,001   | 0,04364 | 28       | 0,28190914  | 2   | 1069,58086 | 1,78     | 74,07    |
| 311 | MAVDDFNLY    | 1      | 1          | Q9C075                   |           | 7,874E6 | 0,001   | 0,03477 | 28       | 0,485611274 | 2   | 1215,57427 | 2,28     | 115,24   |
| 312 | RPVPGATY     | 1      | 1          | P61313                   |           | 1,134E7 | 0,001   | 0,03637 | 28       | 0,412275901 | 2   | 988,55840  | 0,93     | 32,83    |
| 313 | IPVNEKDLTY   | 1      | 1          | O75446                   |           | 8,063E6 | 0,001   | 0,03807 | 27       | 0,736658151 | 2   | 1292,67656 | 2,52     | 83,64    |
| 314 | RPSLPLPHF    | 1      | 1          | Q9BV38                   |           | 1,579E7 | 0,001   | 0,04251 | 27       | 0,241955924 | 2   | 1063,60613 | 1,27     | 101,03   |
| 315 | FPPYHVGQTF   | 4      | 1          | P16989                   |           | 1,452E6 | 0,001   | 0,03847 | 27       | 0,996366343 | 2   | 1192,58196 | 2,81     | 103,88   |
| 316 | RLLPGNATISK  | 2      | 1          | Q460N5                   |           | 5,161E7 | 0,001   | 0,03165 | 27       | 0,288883199 | 2   | 1169,70232 | 1,86     | 61,28    |
| 317 | KLYLPVQNK    | 1      | 1          | Q9Y6A4                   |           | 5,633E6 | 0,001   | 0,03277 | 27       | 0,326837576 | 2   | 1102,66252 | 0,53     | 64,02    |
| 318 | ALDTKIGRYK   | 1      | 1          | O60264                   |           | 4,064E6 | 0,001   | 0,04265 | 27       | 0,392953496 | 2   | 1164,67412 | 0,46     | 45,80    |
| 319 | LPYNHQHEY    | 12     | 1          | O95864                   |           | 1,682E8 | 0,001   | 0,03012 | 27       | 0,55193668  | 2   | 1200,54509 | 1,53     | 43,49    |
| 320 | SPLPTAETPKPL | 1      | 1          | Q16665                   |           | 7,100E6 | 0,001   | 0,04238 | 26       | 0,410518198 | 2   | 1250,70281 | 2,93     | 89,63    |
| 321 | AIDSVHQLHY   | 1      | 1          | Q5VT25                   |           | 5,173E6 | 0,001   | 0,03733 | 26       | 0,764907553 | 2   | 1182,59258 | 1,99     | 68,17    |

| #   | Sequence     | # PSMs | # Proteins | Protein Group Accessions | Mod. (ox) | Area    | q-Value | PEP     | IonScore | Exp. Value  | Ch. | MH+ [Da]   | $\Delta$ M [ppm] | RT [min] |
|-----|--------------|--------|------------|--------------------------|-----------|---------|---------|---------|----------|-------------|-----|------------|------------------|----------|
| 322 | LTTMGDRFTDE  | 5      | 3          | P19105;O14950;P24844     |           | 1,129E5 | 0,001   | 0,03557 | 26       | 0,529946966 | 2   | 1285,57268 | -0,22            | 84,13    |
| 323 | SVYDSVLQK    | 1      | 1          | Q8NF91                   |           | 2,498E7 | 0,001   | 0,03056 | 26       | 0,780149096 | 2   | 1038,54802 | 1,34             | 81,65    |
| 324 | LPFPPGDRVTF  | 3      | 1          | Q6H8Q1                   |           | 4,090E6 | 0,001   | 0,03408 | 26       | 1,149104555 | 2   | 1245,66741 | 3,78             | 123,29   |
| 325 | RTAHVILRY    | 2      | 1          | Q9UKV5                   |           | 3,285E7 | 0,001   | 0,04213 | 26       | 0,665239401 | 2   | 1128,66460 | 0,82             | 49,21    |
| 326 | SFIDVDDERWHY | 1      | 1          | O14929                   |           | 1,748E7 | 0,001   | 0,03913 | 25       | 0,70273335  | 3   | 1581,70017 | 2,07             | 116,16   |
| 327 | LPIENDTYKY   | 1      | 1          | O00186                   |           | 2,575E6 | 0,001   | 0,04033 | 25       | 1,377926824 | 2   | 1255,62602 | 4,38             | 87,48    |
| 328 | FGGRNPFDTF   | 1      | 1          | P25685                   |           | 7,455E6 | 0,001   | 0,03878 | 25       | 0,818853749 | 2   | 1157,53679 | -0,61            | 113,62   |
| 329 | RPPYYTPNQL   | 1      | 1          | Q13310                   |           | 2,863E6 | 0,001   | 0,04376 | 24       | 1,365276701 | 2   | 1248,64031 | 2,51             | 82,79    |
| 330 | RLLEYTPRAR   | 1      | 1          | P49841                   |           | 2,839E6 | 0,001   | 0,03221 | 24       | 1,045581756 | 2   | 1219,67986 | 0,38             | 67,81    |
| 331 | KLGGVIKEK    | 1      | 1          | Q9Y2X3                   |           | 1,775E7 | 0,001   | 0,03548 | 24       | 0,329621937 | 2   | 971,62462  | -0,24            | 30,13    |
| 332 | YLLPHILVY    | 11     | 1          | Q13535                   |           | 1,066E7 | 0,001   | 0,03106 | 24       | 0,826284528 | 2   | 1130,66081 | -0,04            | 144,49   |
| 333 | TPYPAILHEY   | 1      | 1          | Q9P2H3                   |           | 6,138E6 | 0,001   | 0,04016 | 24       | 1,920807075 | 2   | 1203,60820 | 3,10             | 105,43   |
| 334 | KTYHALSNLPK  | 1      | 1          | O00231                   |           | 2,016E6 | 0,001   | 0,04255 | 23       | 1,62925834  | 2   | 1271,71221 | 1,20             | 45,98    |
| 335 | LHLGYLPNQL   | 9      | 1          | Q92499                   |           | 3,982E7 | 0,001   | 0,0313  | 23       | 1,251850787 | 2   | 1167,65239 | 0,25             | 120,05   |
| 336 | LPEEHARFY    | 1      | 2          | Q05513;P41743            |           | 2,391E6 | 0,001   | 0,03175 | 23       | 2,067840932 | 2   | 1161,57207 | 2,84             | 68,88    |
| 337 | YPFDPGNTLAH  | 1      | 1          | P09237                   |           | 5,898E6 | 0,001   | 0,03604 | 21       | 1,956176473 | 2   | 1288,59831 | 2,01             | 96,12    |
| 338 | KYFDEHYEY    | 5      | 1          | P33552                   |           | 5,629E7 | 0,001   | 0,03619 | 20       | 1,412222504 | 2   | 1293,54228 | 0,03             | 75,99    |
| 339 | VVYQYWNTK    | 1      | 1          | Q8N766                   |           | 3,824E6 | 0,001   | 0,03529 | 19       | 5,538911648 | 2   | 1200,60674 | 1,61             | 84,91    |

| #   | Sequence    | # PSMs | # Proteins | Protein Group Accessions           | Mod. (ox) | Area    | q-Value | PEP     | IonScore | Exp. Value  | Ch. | MH+ [Da]   | ΔM [ppm] | RT [min] |
|-----|-------------|--------|------------|------------------------------------|-----------|---------|---------|---------|----------|-------------|-----|------------|----------|----------|
| 340 | RVGDVYIPR   | 1      | 2          | Q9BRL6;Q01130                      |           | 4,780E6 | 0,001   | 0,032   | 19       | 3,625350627 | 2   | 1074,60552 | 0,01     | 67,43    |
| 341 | FPAGIYDTKY  | 2      | 1          | Q96GM8                             |           | 4,195E6 | 0,001   | 0,03726 | 19       | 5,053834761 | 2   | 1174,58171 | 3,22     | 98,62    |
| 342 | RLIQEQLRY   | 1      | 2          | Q9Y2J4;Q8IY63                      |           | 9,856E6 | 0,001   | 0,03446 | 17       | 3,569683192 | 2   | 1218,69853 | 2,60     | 75,75    |
| 343 | VYIVLDKAEY  | 1      | 1          | O43913                             |           | 2,031E6 | 0,001   | 0,03577 | 15       | 10,50499673 | 2   | 1212,65349 | 1,97     | 105,50   |
| 344 | YIYPKHLKY   | 1      | 1          | Q96BY6                             |           | 1,441E7 | 0,001   | 0,03448 | 14       | 8,327766102 | 2   | 1224,68010 | 2,07     | 58,31    |
| 345 | IVAGTLTNK   | 1      | 1          | O75251                             |           | 3,878E7 | 0,002   | 0,05288 | 51       | 0,002451959 | 2   | 916,54686  | 0,67     | 50,56    |
| 346 | KAYHNSPAY   | 1      | 1          | Q969G3                             |           | 3,228E6 | 0,002   | 0,04452 | 49       | 0,004931102 | 2   | 1050,49980 | -0,50    | 29,11    |
| 347 | KPVDPIVGY   | 10     | 1          | Q99715                             |           | 4,556E7 | 0,002   | 0,04634 | 48       | 0,003275346 | 2   | 987,55235  | 1,37     | 83,79    |
| 348 | KLYDIDVAK   | 2      | 1          | P62750                             |           | 2,062E7 | 0,002   | 0,05682 | 48       | 0,004046751 | 2   | 1064,59819 | -0,46    | 71,52    |
| 349 | QTYGHFPSR   | 1      | 1          | O00482                             |           | 4,279E6 | 0,002   | 0,04405 | 48       | 0,008027117 | 2   | 1092,52165 | -0,45    | 47,61    |
| 350 | SPGGVYATRSS | 1      | 1          | P08670                             |           | 5,594E6 | 0,002   | 0,04851 | 46       | 0,009466981 | 2   | 1081,52971 | 2,23     | 41,22    |
| 351 | RLYLNGDGTGK | 1      | 1          | Q13077                             |           | 3,967E6 | 0,002   | 0,04616 | 45       | 0,011518872 | 2   | 1193,63017 | 2,36     | 47,45    |
| 352 | ATGDMSGLLK  | 4      | 1          | Q13685                             |           | 1,950E5 | 0,002   | 0,05338 | 45       | 0,00996079  | 2   | 992,51061  | 2,45     | 83,75    |
| 353 | SPALTISKVLL | 2      | 5          | Q969T4;P62837;P61077;P51965;Q96LR5 |           | 2,635E5 | 0,002   | 0,04934 | 45       | 0,002440742 | 2   | 1141,71904 | -0,09    | 126,46   |
| 354 | KLYEEPLSK   | 1      | 1          | Q13535                             |           | 4,214E6 | 0,002   | 0,0545  | 44       | 0,009033489 | 2   | 1106,61382 | 4,13     | 55,73    |
| 355 | IPYGERITL   | 1      | 1          | P49750                             |           | 1,023E7 | 0,002   | 0,0454  | 44       | 0,011933683 | 2   | 1061,60137 | 2,22     | 98,61    |
| 356 | APYPLYPAEL  | 9      | 1          | Q93062                             |           | 9,943E5 | 0,002   | 0,04824 | 44       | 0,019114105 | 2   | 1133,58794 | 0,15     | 145,87   |
| 357 | RVGTVIGSNK  | 1      | 1          | P09874                             |           | 1,728E7 | 0,002   | 0,05701 | 43       | 0,012346882 | 2   | 1030,60076 | 0,32     | 32,08    |

| #   | Sequence    | # PSMs | # Proteins | Protein Group Accessions | Mod. (ox) | Area    | q-Value | PEP     | IonScore | Exp. Value  | Ch. | MH+ [Da]   | ΔM [ppm] | RT [min] |
|-----|-------------|--------|------------|--------------------------|-----------|---------|---------|---------|----------|-------------|-----|------------|----------|----------|
| 358 | RSVDVTNTTF  | 1      | 1          | O14579                   |           | 1,535E7 | 0,002   | 0,05739 | 43       | 0,022176828 | 2   | 1139,57085 | 1,47     | 75,68    |
| 359 | GIYVQDVKTGK | 1      | 1          | Q14764                   |           | 3,049E6 | 0,002   | 0,0466  | 42       | 0,017422434 | 2   | 1207,67266 | 3,72     | 53,56    |
| 360 | KIYEGQVEV   | 2      | 1          | P46777                   |           | 4,871E7 | 0,002   | 0,05394 | 42       | 0,022987363 | 2   | 1064,56548 | 2,99     | 74,23    |
| 361 | RILSGVGTK   | 2      | 1          | P62280                   |           | 1,162E8 | 0,002   | 0,05686 | 41       | 0,006344392 | 2   | 972,61955  | -0,55    | 48,41    |
| 362 | RPSQNNTIGL  | 1      | 1          | Q9H0H0                   |           | 3,362E6 | 0,002   | 0,04768 | 40       | 0,026425514 | 2   | 1099,58733 | 1,67     | 59,14    |
| 363 | SVYRTPVVNLK | 1      | 1          | P20929                   |           | 4,952E6 | 0,002   | 0,05211 | 40       | 0,014748922 | 2   | 1275,74590 | 3,06     | 72,45    |
| 364 | SFFDLNPKY   | 1      | 2          | Q9BQL6;Q96AC1            |           | 3,745E6 | 0,002   | 0,05677 | 40       | 0,041335109 | 2   | 1130,55596 | 3,75     | 123,27   |
| 365 | FPANNIVKF   | 4      | 1          | P43307                   |           | 4,298E5 | 0,002   | 0,05523 | 39       | 0,036599739 | 2   | 1049,57756 | -0,31    | 108,36   |
| 366 | SSYGGTLRY   | 1      | 1          | O15230                   |           | 1,633E6 | 0,002   | 0,0569  | 39       | 0,034555429 | 2   | 1003,48613 | 1,77     | 66,55    |
| 367 | mIYASSKDAIK | 2      | 3          | P23528;Q9Y281;P60981     | M1        | 6,272E6 | 0,002   | 0,04497 | 39       | 0,046233718 | 2   | 1242,63982 | -0,07    | 46,02    |
| 368 | GVIGQDGLLFK | 1      | 1          | Q9NQT5                   |           | 5,442E6 | 0,002   | 0,05631 | 39       | 0,036282501 | 2   | 1146,65373 | 1,69     | 115,46   |
| 369 | GLTDVILYH   | 1      | 1          | O60506                   |           | 2,762E7 | 0,002   | 0,05449 | 39       | 0,058447508 | 2   | 1030,56035 | 3,44     | 120,38   |
| 370 | RTAVPSFLTK  | 5      | 1          | Q96QD9                   |           | 4,409E7 | 0,002   | 0,04858 | 38       | 0,026839336 | 2   | 1119,65532 | 2,86     | 73,78    |
| 371 | STFNQVVLK   | 1      | 1          | Q07020                   |           | 9,138E6 | 0,002   | 0,05007 | 38       | 0,044147802 | 2   | 1035,58354 | 0,18     | 78,81    |
| 372 | GTYQPLSTR   | 1      | 1          | O15213                   |           | 1,795E5 | 0,002   | 0,05742 | 38       | 0,069443478 | 2   | 1022,52629 | -0,26    | 54,68    |
| 373 | RVAPAHGLFLK | 1      | 1          | Q8N0Z8                   |           | 3,739E6 | 0,002   | 0,04855 | 37       | 0,020083556 | 2   | 1208,73064 | 3,59     | 60,32    |
| 374 | KLEEQARAK   | 1      | 1          | Q14247                   |           | 2,177E6 | 0,002   | 0,05354 | 37       | 0,073563036 | 2   | 1072,61138 | 0,36     | 20,06    |
| 375 | GVAERSWLY   | 3      | 1          | O00255                   |           | 2,367E7 | 0,002   | 0,04529 | 36       | 0,074190929 | 2   | 1080,55058 | 3,03     | 95,48    |

| #   | Sequence    | # PSMs | # Proteins | Protein Group Accessions | Mod. (ox) | Area    | q-Value | PEP     | IonScore | Exp. Value  | Ch. | MH+ [Da]   | ΔM [ppm] | RT [min] |
|-----|-------------|--------|------------|--------------------------|-----------|---------|---------|---------|----------|-------------|-----|------------|----------|----------|
| 376 | RLLQKVLAY   | 1      | 1          | Q5PRF9                   |           | 9,078E6 | 0,002   | 0,0439  | 36       | 0,009372159 | 2   | 1103,69585 | 2,05     | 86,08    |
| 377 | RPELVRPAL   | 11     | 3          | P52895;Q04828;P42330     |           | 1,106E6 | 0,002   | 0,04623 | 35       | 0,017288068 | 2   | 1050,64128 | -0,59    | 67,85    |
| 378 | LPHAPGVQm   | 1      | 2          | Q92769;Q13547            | M9        | 1,189E7 | 0,002   | 0,05424 | 35       | 0,142213884 | 2   | 965,49083  | 3,59     | 62,48    |
| 379 | RPPSITSQTSL | 1      | 1          | Q9NYB9                   |           | 4,046E6 | 0,002   | 0,04625 | 35       | 0,139693612 | 2   | 1186,64531 | 2,22     | 71,70    |
| 380 | DVIRLIMQY   | 14     | 1          | Q2TAY7                   |           | 5,191E5 | 0,002   | 0,05145 | 35       | 0,084681899 | 2   | 1150,62883 | -0,10    | 158,08   |
| 381 | RSNPYYIVK   | 1      | 1          | Q9UQE7                   |           | 4,599E6 | 0,002   | 0,04813 | 35       | 0,092999026 | 2   | 1139,62505 | 3,73     | 54,92    |
| 382 | GVADKILKK   | 3      | 1          | Q13287                   |           | 2,104E5 | 0,002   | 0,05708 | 34       | 0,032810746 | 2   | 971,62444  | -0,43    | 43,69    |
| 383 | RPYEPINSI   | 3      | 1          | Q8WUA4                   |           | 4,020E7 | 0,002   | 0,04425 | 34       | 0,189992643 | 2   | 1088,57305 | -0,44    | 79,38    |
| 384 | KVFQEPLFY   | 10     | 1          | P07711                   |           | 2,685E5 | 0,002   | 0,04876 | 34       | 0,139374498 | 2   | 1170,61907 | -0,29    | 117,36   |
| 385 | LPPPVFQmL   | 1      | 1          | Q15388                   | M8        | 2,689E7 | 0,002   | 0,04938 | 34       | 0,140694657 | 2   | 1057,57854 | 3,23     | 136,59   |
| 386 | TPVDDRVDY   | 1      | 1          | P20929                   |           | 1,251E7 | 0,002   | 0,04483 | 34       | 0,163108241 | 2   | 1079,50163 | 1,12     | 68,11    |
| 387 | GVYSFQFNK   | 2      | 1          | Q15434                   |           | 1,681E5 | 0,002   | 0,04983 | 33       | 0,182672514 | 2   | 1089,53606 | -0,31    | 94,43    |
| 388 | IFIEDAIKY   | 6      | 1          | O14791                   |           | 6,782E6 | 0,002   | 0,0483  | 33       | 0,137288765 | 2   | 1111,60283 | -0,54    | 127,57   |
| 389 | NPVNYGRPY   | 1      | 1          | Q9UJK0                   |           | 1,795E6 | 0,002   | 0,05617 | 33       | 0,189404277 | 2   | 1079,53069 | 3,52     | 63,41    |
| 390 | DPIGGHIHSY  | 1      | 1          | B0I1T2                   |           | 1,552E7 | 0,002   | 0,04501 | 33       | 0,166108068 | 2   | 1095,52532 | 3,20     | 62,16    |
| 391 | DYDPLVVKL   | 1      | 1          | Q96A65                   |           | 9,581E6 | 0,002   | 0,05383 | 32       | 0,159517277 | 2   | 1061,59172 | 3,71     | 130,22   |
| 392 | AVLTKQLLH   | 1      | 1          | Q14094                   |           | 8,672E6 | 0,002   | 0,05354 | 32       | 0,034846951 | 2   | 1022,63487 | -0,84    | 64,60    |
| 393 | QSFDKEWVAK  | 1      | 1          | P13073                   |           | 9,829E6 | 0,002   | 0,04617 | 32       | 0,26830297  | 2   | 1237,62090 | -0,26    | 67,09    |



| #   | Sequence    | # PSMs | # Proteins | Protein Group Accessions                                                                                                                                                                                                                             | Mod. (ox) | Area    | q-Value | PEP     | IonScore | Exp. Value  | Ch. | MH+ [Da]   | ΔM [ppm] | RT [min] |
|-----|-------------|--------|------------|------------------------------------------------------------------------------------------------------------------------------------------------------------------------------------------------------------------------------------------------------|-----------|---------|---------|---------|----------|-------------|-----|------------|----------|----------|
| 394 | RIIETLALK   | 1      | 1          | O15144                                                                                                                                                                                                                                               |           | 1,736E7 | 0,002   | 0,04425 | 32       | 0,089725401 | 2   | 1185,72368 | 2,93     | 82,61    |
| 395 | APAPIHNQF   | 16     | 1          | Q15011                                                                                                                                                                                                                                               |           | 2,304E8 | 0,002   | 0,05239 | 32       | 0,173974943 | 2   | 994,51189  | 1,36     | 62,94    |
| 396 | APEEHPVLL   | 7      | 3          | P60709;P63261;A5A3E0                                                                                                                                                                                                                                 |           | 1,782E6 | 0,002   | 0,0537  | 32       | 0,382228623 | 2   | 1004,54094 | -0,23    | 83,52    |
| 397 | HPVPQPLQSF  | 8      | 1          | Q9Y5Q3                                                                                                                                                                                                                                               |           | 2,368E5 | 0,002   | 0,04969 | 31       | 0,255128686 | 2   | 1149,60491 | -0,22    | 94,87    |
| 398 | NPYSGDLTKF  | 2      | 1          | Q14157                                                                                                                                                                                                                                               |           | 1,513E7 | 0,002   | 0,05109 | 31       | 0,265942785 | 2   | 1141,55254 | 0,08     | 95,84    |
| 399 | RQNVQVFEF   | 5      | 3          | P52895;Q04828;P42330                                                                                                                                                                                                                                 |           | 2,320E5 | 0,002   | 0,04396 | 31       | 0,275230463 | 2   | 1166,59502 | -0,27    | 104,28   |
| 400 | GSHSmRYFY   | 3      | 35         | P01891;P10316;P13746;P18462;P30450;P30453;P30456;P30457;P01889;P30461;P30462;P30464;P30685;Q95365;P30475;P30480;P30481;P30484;P30485;P30486;P18464;P30490;P30491;P30492;P30493;P30495;P18465;P10319;Q29940;Q29836;P30498;Q31610;Q29718;P04222;Q95604 | M5        | 5,693E7 | 0,002   | 0,05771 | 31       | 0,137402967 | 2   | 1163,49870 | 4,15     | 53,54    |
| 401 | KVADMALHY   | 13     | 1          | P50990                                                                                                                                                                                                                                               |           | 1,086E8 | 0,002   | 0,04983 | 31       | 0,433220222 | 2   | 1047,52873 | -0,47    | 69,76    |
| 402 | YPVEIHEYL   | 2      | 1          | Q13901                                                                                                                                                                                                                                               |           | 2,253E7 | 0,002   | 0,0551  | 31       | 0,380355256 | 2   | 1162,58196 | 3,47     | 110,17   |
| 403 | LPYTVVIHY   | 1      | 1          | Q9NZ08                                                                                                                                                                                                                                               |           | 7,379E6 | 0,002   | 0,05192 | 30       | 0,316832566 | 2   | 1104,61138 | 2,31     | 113,99   |
| 404 | GTmTGmLYK   | 3      | 2          | Q5SRD1;O14925                                                                                                                                                                                                                                        | M3;M6     | 4,482E7 | 0,002   | 0,04518 | 30       | 0,233171671 | 2   | 1033,47026 | 0,90     | 43,67    |
| 405 | ATGSWDSFLK  | 3      | 3          | P62879;P62873;P16520                                                                                                                                                                                                                                 |           | 2,540E7 | 0,002   | 0,04695 | 30       | 0,359021291 | 2   | 1111,54399 | 1,88     | 111,18   |
| 406 | QLYKEQLAK   | 3      | 1          | P35579                                                                                                                                                                                                                                               |           | 8,672E7 | 0,002   | 0,05263 | 30       | 0,23843724  | 2   | 1120,63689 | 0,68     | 45,91    |
| 407 | VVYVGILTK   | 4      | 1          | Q16880                                                                                                                                                                                                                                               |           | 2,039E5 | 0,002   | 0,04932 | 30       | 0,076524711 | 2   | 1048,64006 | -0,08    | 99,66    |
| 408 | KPYNPIIGETF | 2      | 2          | Q9BXB5;Q9BXB4                                                                                                                                                                                                                                        |           | 1,478E7 | 0,002   | 0,05236 | 30       | 0,375199153 | 2   | 1278,67729 | 3,43     | 107,98   |

| #   | Sequence     | # PSMs | # Proteins | Protein Group Accessions | Mod. (ox) | Area    | q-Value | PEP     | IonScore | Exp. Value  | Ch. | MH+ [Da]   | ΔM [ppm] | RT [min] |
|-----|--------------|--------|------------|--------------------------|-----------|---------|---------|---------|----------|-------------|-----|------------|----------|----------|
| 409 | ILYDHAHVK    | 1      | 1          | P11926                   |           | 1,380E7 | 0,002   | 0,04438 | 30       | 0,285160192 | 2   | 1095,59551 | 0,84     | 41,09    |
| 410 | GPGVAFRPSI   | 1      | 1          | P08727                   |           | 6,094E6 | 0,002   | 0,04876 | 30       | 0,237301645 | 2   | 1071,59807 | 3,22     | 99,91    |
| 411 | KLNITPTKK    | 1      | 1          | Q7KZ85                   |           | 0,000E0 | 0,002   | 0,04808 | 30       | 0,080142285 | 2   | 1042,66069 | -1,21    | 29,38    |
| 412 | APLKSKMIY    | 1      | 3          | P23528;Q9Y281;P60981     |           | 2,341E7 | 0,002   | 0,05764 | 29       | 0,182066612 | 2   | 1050,60588 | 4,02     | 56,18    |
| 413 | NGFQEVHSF    | 1      | 1          | Q4VNC1                   |           | 3,757E6 | 0,002   | 0,05065 | 29       | 0,316127996 | 2   | 1064,48039 | 0,73     | 81,37    |
| 414 | LRYYNILF     | 6      | 1          | Q7Z3Z3                   |           | 1,337E6 | 0,002   | 0,05585 | 29       | 0,366042537 | 2   | 1101,60918 | 0,02     | 133,06   |
| 415 | LPDKWQHDL    | 1      | 1          | Q86V81                   |           | 7,849E6 | 0,002   | 0,0479  | 29       | 0,430287522 | 2   | 1151,58684 | 2,09     | 77,11    |
| 416 | RPPIGSISSm   | 1      | 1          | Q9BQY9                   | M10       | 9,219E6 | 0,002   | 0,04693 | 29       | 0,756445315 | 2   | 1060,54704 | 1,35     | 60,77    |
| 417 | LAVASFPKKQE  | 1      | 1          | P14406                   |           | 4,869E6 | 0,002   | 0,05613 | 29       | 0,348302216 | 2   | 1217,69267 | 3,09     | 60,12    |
| 418 | RTFPFSLQY    | 2      | 1          | O75159                   |           | 6,540E6 | 0,002   | 0,04961 | 29       | 0,555769427 | 2   | 1158,59819 | 3,40     | 122,84   |
| 419 | RVDSKTLTR    | 1      | 1          | Q969V3                   |           | 5,705E5 | 0,002   | 0,04803 | 29       | 0,289505185 | 2   | 1075,62712 | 4,87     | 27,20    |
| 420 | MPNPEGRYTF   | 1      | 1          | P04626                   |           | 2,350E6 | 0,002   | 0,0506  | 28       | 0,365393002 | 2   | 1211,55364 | 1,83     | 88,85    |
| 421 | GTAPPTLALHY  | 1      | 1          | P12980                   |           | 8,134E6 | 0,002   | 0,05584 | 28       | 0,494406029 | 2   | 1140,60735 | 2,21     | 98,87    |
| 422 | VIHEKGFYY    | 5      | 1          | P50591                   |           | 5,347E7 | 0,002   | 0,04993 | 28       | 0,602876869 | 2   | 1155,58464 | 1,13     | 66,47    |
| 423 | VIADLRNAFY   | 1      | 1          | P35575                   |           | 3,020E6 | 0,002   | 0,05467 | 28       | 0,523702913 | 2   | 1181,63542 | 3,42     | 116,57   |
| 424 | LPASGRSAEVTL | 1      | 1          | O15533                   |           | 1,184E7 | 0,002   | 0,0576  | 27       | 0,825773788 | 2   | 1200,66167 | 2,77     | 76,53    |
| 425 | EAIKILKGEY   | 1      | 1          | Q92499                   |           | 1,674E7 | 0,002   | 0,04862 | 27       | 0,330112297 | 2   | 1163,67082 | 3,20     | 79,07    |
| 426 | YLPKEQYLY    | 1      | 1          | Q9Y4W6                   |           | 3,621E7 | 0,002   | 0,05712 | 26       | 1,002520658 | 2   | 1216,62871 | 3,16     | 92,10    |

| #   | Sequence     | # PSMs | # Proteins | Protein Group Accessions | Mod. (ox) | Area    | q-Value | PEP     | IonScore | Exp. Value  | Ch. | MH+ [Da]   | ΔM [ppm] | RT [min] |
|-----|--------------|--------|------------|--------------------------|-----------|---------|---------|---------|----------|-------------|-----|------------|----------|----------|
| 427 | AFKAFLKSEY   | 1      | 1          | P49798                   |           | 2,347E7 | 0,002   | 0,05246 | 26       | 1,065897228 | 2   | 1203,64299 | 1,75     | 81,55    |
| 428 | QALLHPVTSGLK | 1      | 1          | Q8IWD5                   |           | 1,370E5 | 0,002   | 0,05026 | 26       | 0,337242824 | 2   | 1263,74211 | 0,09     | 81,72    |
| 429 | AVADKVHLmYK  | 1      | 1          | Q14258                   | M9        | 2,335E6 | 0,002   | 0,04532 | 25       | 1,302408873 | 2   | 1290,69390 | 4,93     | 53,85    |
| 430 | RVLLPTGNQR   | 1      | 1          | P53814                   |           | 5,279E6 | 0,002   | 0,04552 | 25       | 0,391656295 | 2   | 1153,68193 | 1,61     | 51,34    |
| 431 | ATLSQFYINK   | 1      | 1          | Q96EK5                   |           | 5,703E6 | 0,002   | 0,04948 | 25       | 1,008366385 | 2   | 1184,63469 | 3,09     | 94,27    |
| 432 | AILDTAHQY    | 1      | 1          | Q5VSG8                   |           | 1,610E7 | 0,002   | 0,05194 | 25       | 1,17168781  | 2   | 1031,51738 | 1,67     | 76,88    |
| 433 | YRDIPELQGF   | 1      | 1          | Q86V21                   |           | 9,997E6 | 0,002   | 0,05723 | 25       | 1,246783116 | 2   | 1237,62432 | 2,51     | 116,18   |
| 434 | AIALALREK    | 1      | 1          | P42285                   |           | 0,000E0 | 0,002   | 0,05359 | 24       | 0,410988894 | 2   | 984,62419  | 4,16     | 63,68    |
| 435 | LFDHAVSKF    | 1      | 1          | O60488                   |           | 1,055E7 | 0,002   | 0,04744 | 24       | 1,626581233 | 2   | 1063,55828 | 1,06     | 81,86    |
| 436 | SLmHSFILK    | 6      | 1          | Q9NP97                   | M3        | 2,857E7 | 0,002   | 0,05625 | 24       | 1,278320688 | 2   | 1091,59368 | 1,69     | 71,64    |
| 437 | NPAENFRVL    | 12     | 1          | P13010                   |           | 7,976E7 | 0,002   | 0,04825 | 24       | 1,631126674 | 2   | 1059,55828 | 0,05     | 92,78    |
| 438 | STYPRPHEY    | 3      | 1          | Q9UBR2                   |           | 9,151E7 | 0,002   | 0,05506 | 22       | 1,67267086  | 2   | 1149,53435 | 1,73     | 43,49    |
| 439 | YLWHIPLTY    | 7      | 1          | Q6P179                   |           | 1,314E7 | 0,002   | 0,04729 | 22       | 3,258811029 | 2   | 1205,63591 | 0,45     | 146,80   |
| 440 | RPIEDDQEVY   | 1      | 1          | O15117                   |           | 8,002E6 | 0,002   | 0,04716 | 22       | 2,620655718 | 2   | 1263,58476 | -0,36    | 67,10    |
| 441 | LPLPNDKTLTY  | 1      | 1          | Q969X6                   |           | 1,150E7 | 0,002   | 0,05123 | 22       | 1,44097467  | 2   | 1286,73943 | 3,04     | 119,47   |
| 442 | YPDEYHGEY    | 2      | 1          | Q15417                   |           | 3,054E7 | 0,002   | 0,05302 | 21       | 0,445771467 | 2   | 1172,45622 | 2,66     | 70,57    |
| 443 | FPDRImNTF    | 1      | 2          | P04350;Q9BUF5            | M6        | 6,150E6 | 0,002   | 0,04875 | 21       | 2,681430011 | 2   | 1156,54924 | 3,13     | 97,02    |
| 444 | EVNKFQmAY    | 1      | 1          | P37108                   | M7        | 2,733E6 | 0,002   | 0,04933 | 19       | 3,447960747 | 2   | 1145,53020 | 0,51     | 64,06    |

| #   | Sequence    | # PSMs | # Proteins | Protein Group Accessions | Mod. (ox) | Area    | q-Value | PEP     | IonScore | Exp. Value  | Ch. | MH+ [Da]   | ΔM [ppm] | RT [min] |
|-----|-------------|--------|------------|--------------------------|-----------|---------|---------|---------|----------|-------------|-----|------------|----------|----------|
| 445 | IPYQDRESY   | 1      | 1          | Q9H2Y7                   |           | 8,685E6 | 0,002   | 0,04528 | 19       | 4,08316201  | 2   | 1170,54204 | -0,48    | 64,65    |
| 446 | FIANLFNRY   | 1      | 1          | P13796                   |           | 1,248E6 | 0,002   | 0,05156 | 17       | 7,93244131  | 2   | 1157,61540 | 4,46     | 120,84   |
| 447 | ImKFINDQY   | 1      | 1          | Q9UHD8                   | M2        | 2,981E6 | 0,002   | 0,05616 | 16       | 8,030553348 | 2   | 1187,58159 | 4,23     | 83,40    |
| 448 | VTYNYPVHY   | 1      | 1          | Q9NV96                   |           | 3,908E6 | 0,002   | 0,05443 | 16       | 10,82560606 | 2   | 1155,54863 | 1,47     | 86,13    |
| 449 | YYPEYKLLF   | 1      | 1          | P61421                   |           | 3,423E7 | 0,002   | 0,05739 | 13       | 23,14325485 | 2   | 1235,63970 | 4,04     | 133,08   |
| 450 | FPDPNVKYVF  | 1      | 1          | P22415                   |           | 6,499E6 | 0,002   | 0,04991 | 13       | 20,29955256 | 2   | 1225,62749 | 1,84     | 122,56   |
| 451 | SPNQARAQAAL | 1      | 1          | P26599                   |           | 1,299E7 | 0,003   | 0,05918 | 54       | 0,001299536 | 2   | 1126,59746 | 0,94     | 45,32    |
| 452 | QARIEIESF   | 3      | 1          | P11021                   |           | 2,396E5 | 0,003   | 0,05984 | 53       | 0,002530171 | 2   | 1092,56816 | -0,26    | 96,79    |
| 453 | IPKQVSISF   | 1      | 1          | Q96D46                   |           | 1,001E7 | 0,003   | 0,05957 | 52       | 0,001566822 | 2   | 1018,59374 | 0,53     | 63,84    |
| 454 | RPPTAGSQF   | 2      | 1          | O43795                   |           | 1,341E5 | 0,003   | 0,06484 | 51       | 0,003293061 | 2   | 960,48992  | 0,12     | 45,86    |
| 455 | KPITGGVY    | 1      | 1          | Q14192                   |           | 8,987E7 | 0,003   | 0,06305 | 49       | 0,003991781 | 2   | 1036,56963 | 2,18     | 62,57    |
| 456 | FVATAAAVHY  | 1      | 1          | Q15546                   |           | 0,000E0 | 0,003   | 0,06304 | 49       | 0,004803767 | 2   | 1049,54424 | 2,62     | 83,59    |
| 457 | KVNIVPIAK   | 5      | 1          | Q15019                   |           | 2,315E5 | 0,003   | 0,06259 | 49       | 0,000175713 | 2   | 1080,71282 | -1,10    | 72,41    |
| 458 | LPAKILVEF   | 21     | 1          | O95229                   |           | 8,062E5 | 0,003   | 0,06224 | 47       | 0,002872207 | 2   | 1029,63371 | -0,62    | 126,17   |
| 459 | KTFEGLTTK   | 1      | 1          | Q6P2Q9                   |           | 2,472E7 | 0,003   | 0,05935 | 47       | 0,007922879 | 2   | 1138,61223 | 1,69     | 43,50    |
| 460 | KVGEVIVTK   | 1      | 1          | P10809                   |           | 9,055E6 | 0,003   | 0,05967 | 46       | 0,002744056 | 2   | 972,60997  | 1,14     | 43,81    |
| 461 | GTYAPAEVPK  | 10     | 2          | P52895;Q04828            |           | 3,593E8 | 0,003   | 0,06344 | 46       | 0,014193242 | 2   | 1032,53594 | -0,14    | 60,44    |
| 462 | SVLSPLLNK   | 4      | 1          | Q12929                   |           | 6,648E5 | 0,003   | 0,05959 | 45       | 0,005361541 | 2   | 970,59282  | -0,39    | 100,72   |

| #   | Sequence    | # PSMs | # Proteins | Protein Group Accessions | Mod. (ox) | Area    | q-Value | PEP     | IonScore | Exp. Value  | Ch. | MH+ [Da]   | ΔM [ppm] | RT [min] |
|-----|-------------|--------|------------|--------------------------|-----------|---------|---------|---------|----------|-------------|-----|------------|----------|----------|
| 463 | LPLPDPLKY   | 1      | 1          | Q9NV79                   |           | 6,814E6 | 0,003   | 0,05854 | 43       | 0,00768533  | 2   | 1055,61650 | 2,75     | 122,75   |
| 464 | RPINALDEL   | 1      | 1          | Q8TCU6                   |           | 1,982E7 | 0,003   | 0,06278 | 40       | 0,029651178 | 2   | 1040,57561 | 1,99     | 95,00    |
| 465 | FVQMMTAK    | 1      | 1          | P62158                   |           | 2,138E5 | 0,003   | 0,0582  | 40       | 0,032043779 | 2   | 955,47350  | -0,56    | 69,49    |
| 466 | RIYNGIGVSR  | 1      | 1          | Q96PD2                   |           | 7,371E6 | 0,003   | 0,06296 | 39       | 0,028243377 | 2   | 1134,64031 | 2,15     | 56,82    |
| 467 | KVANIILSY   | 13     | 1          | Q96JI7                   |           | 1,079E8 | 0,003   | 0,06157 | 39       | 0,017234925 | 2   | 1020,60857 | -0,27    | 102,79   |
| 468 | KVAPAPAVVKK | 1      | 1          | P62424                   |           | 1,662E6 | 0,003   | 0,06074 | 38       | 0,00192799  | 2   | 1107,72490 | -0,01    | 30,18    |
| 469 | AIIDHIFASK  | 1      | 1          | Q8TAS1                   |           | 3,082E7 | 0,003   | 0,06275 | 38       | 0,042080603 | 2   | 1114,62859 | 2,71     | 96,76    |
| 470 | KTYGEIFEK   | 13     | 1          | O95298                   |           | 1,883E8 | 0,003   | 0,0623  | 37       | 0,061949819 | 2   | 1114,58183 | 3,49     | 62,21    |
| 471 | STSQTFIYK   | 1      | 1          | O60341                   |           | 1,015E7 | 0,003   | 0,06072 | 37       | 0,111013902 | 2   | 1074,54607 | -0,51    | 65,32    |
| 472 | RLFPPLRQR   | 2      | 1          | Q8NBM4                   |           | 6,638E7 | 0,003   | 0,06047 | 36       | 0,021828089 | 2   | 1182,72576 | 3,28     | 61,40    |
| 473 | RVNPKTIGK   | 1      | 1          | P80162                   |           | 2,328E6 | 0,003   | 0,0582  | 36       | 0,024046446 | 2   | 1012,62975 | 3,46     | 25,12    |
| 474 | ALYPHVLVK   | 1      | 1          | Q9BUJ2                   |           | 3,502E7 | 0,003   | 0,06098 | 36       | 0,016630153 | 2   | 1039,63249 | 2,48     | 75,35    |
| 475 | APYRDLPASL  | 1      | 1          | P54259                   |           | 2,171E7 | 0,003   | 0,05971 | 36       | 0,132209883 | 2   | 1102,59038 | 1,09     | 92,50    |
| 476 | FPmTHGNTGF  | 3      | 1          | Q15366                   | M3        | 4,112E7 | 0,003   | 0,05846 | 35       | 0,05193986  | 2   | 1124,48503 | 1,80     | 70,27    |
| 477 | IPYALRVEL   | 1      | 1          | P02679                   |           | 3,359E7 | 0,003   | 0,0587  | 34       | 0,077400668 | 2   | 1073,63799 | 2,41     | 120,07   |
| 478 | NPYHVILF    | 12     | 1          | Q86X29                   |           | 1,337E6 | 0,003   | 0,05923 | 31       | 0,20822437  | 2   | 1101,60906 | -0,10    | 133,42   |
| 479 | SPVIHPPVSY  | 1      | 1          | Q15904                   |           | 1,133E7 | 0,003   | 0,05908 | 31       | 0,246516004 | 2   | 1095,58696 | 3,30     | 88,62    |
| 480 | STNTRVLYF   | 8      | 1          | P49755                   |           | 4,956E5 | 0,003   | 0,06395 | 30       | 0,376208259 | 2   | 1100,57341 | -0,09    | 93,27    |

| #   | Sequence     | # PSMs | # Proteins | Protein Group Accessions                                                             | Mod. (ox) | Area    | q-Value | PEP     | IonScore | Exp. Value  | Ch. | MH+ [Da]   | ΔM [ppm] | RT [min] |
|-----|--------------|--------|------------|--------------------------------------------------------------------------------------|-----------|---------|---------|---------|----------|-------------|-----|------------|----------|----------|
| 481 | ATAASSSSLEKS | 1      | 7          | P60709;P63261;Q6S8J3;P62736;P68032;P63267;P68133                                     |           | 4,806E4 | 0,003   | 0,05884 | 30       | 0,42155     | 2   | 1138,55864 | -0,03    | 34,56    |
| 482 | GLYQDGVFK    | 1      | 1          | Q9H8T0                                                                               |           | 5,458E6 | 0,003   | 0,06132 | 30       | 0,263438566 | 2   | 1026,52690 | 1,36     | 86,32    |
| 483 | GSHSmRYFFT   | 5      | 7          | P01892;P30443;P04439;P10314;P30455;P30459;Q09160                                     | M5        | 4,958E7 | 0,003   | 0,05841 | 29       | 0,217085602 | 2   | 1248,54582 | -0,67    | 68,63    |
| 484 | PYNHQHEY     | 1      | 1          | O95864                                                                               |           | 3,545E6 | 0,003   | 0,0602  | 28       | 0,23116088  | 2   | 1087,46050 | 1,21     | 43,56    |
| 485 | IYSHVTAAY    | 1      | 1          | Q8WWM9                                                                               |           | 2,305E7 | 0,003   | 0,06171 | 26       | 1,087482481 | 2   | 1024,51042 | 0,58     | 65,69    |
| 486 | ALNVPLHNR    | 1      | 1          | Q6ZMI0                                                                               |           | 1,181E7 | 0,003   | 0,0598  | 26       | 0,600480579 | 2   | 1033,59282 | 2,55     | 54,53    |
| 487 | VPAPWLSVKL   | 1      | 2          | O95782;O94973                                                                        |           | 2,590E6 | 0,003   | 0,06359 | 25       | 0,207419265 | 2   | 1109,67595 | 3,74     | 133,09   |
| 488 | FPQKIAGELY   | 1      | 1          | Q9GZM5                                                                               |           | 2,854E7 | 0,003   | 0,06333 | 25       | 1,012370024 | 2   | 1165,62798 | 2,36     | 98,66    |
| 489 | KINPTSSLYK   | 1      | 1          | O75665                                                                               |           | 3,580E6 | 0,003   | 0,06428 | 24       | 0,969897023 | 2   | 1150,65019 | 3,05     | 52,06    |
| 490 | AVIGADSVTLK  | 1      | 1          | Q9NYH9                                                                               |           | 1,476E7 | 0,003   | 0,05972 | 24       | 1,129968682 | 2   | 1073,62139 | 1,14     | 84,72    |
| 491 | YFIGRIYLY    | 5      | 1          | P41250                                                                               |           | 9,637E4 | 0,003   | 0,06043 | 24       | 1,626925948 | 2   | 1207,65190 | 0,73     | 134,08   |
| 492 | FTIPANREF    | 1      | 1          | P01024                                                                               |           | 1,964E7 | 0,003   | 0,05802 | 23       | 1,453047516 | 2   | 1094,56609 | 2,85     | 98,59    |
| 493 | FPVKGLKTTY   | 1      | 1          | P19174                                                                               |           | 9,963E6 | 0,003   | 0,05881 | 22       | 1,137353147 | 2   | 1109,63750 | 1,89     | 70,97    |
| 494 | ATYYGAFIKK   | 1      | 3          | Q8N4C8;Q9UKE5;O95819                                                                 |           | 1,812E7 | 0,003   | 0,06226 | 22       | 2,724695296 | 2   | 1161,63262 | 1,99     | 71,57    |
| 495 | MPVRGPDVEAY  | 1      | 1          | Q9NQ34                                                                               |           | 9,347E6 | 0,003   | 0,06103 | 21       | 3,123309382 | 2   | 1233,59697 | 2,98     | 84,29    |
| 496 | mAVDDFNLKY   | 2      | 1          | Q9C075                                                                               | M1        | 5,842E6 | 0,003   | 0,06337 | 21       | 2,11240443  | 2   | 1231,57060 | 3,41     | 102,05   |
| 497 | SPEEGARVY    | 1      | 1          | Q8TE68                                                                               |           | 1,141E7 | 0,003   | 0,06211 | 20       | 3,981407819 | 2   | 1007,48009 | 0,79     | 49,41    |
| 498 | GSHSMRYFY    | 1      | 35         | P01891;P10316;P13746;P18462;P30450;P30453;P30456;P30457;P01889;P30461;P30462;P30464; |           | 2,047E7 | 0,003   | 0,06203 | 19       | 2,087123159 | 2   | 1147,50066 | 1,48     | 65,50    |

| #   | Sequence    | # PSMs | # Proteins | Protein Group Accessions                                                                                                                                         | Mod. (ox) | Area    | q-Value | PEP     | IonScore | Exp. Value  | Ch. | MH+ [Da]   | ΔM [ppm] | RT [min] |
|-----|-------------|--------|------------|------------------------------------------------------------------------------------------------------------------------------------------------------------------|-----------|---------|---------|---------|----------|-------------|-----|------------|----------|----------|
|     |             |        |            | P30685;Q95365;P30475;P30480;P30481;P30484;P30485;P30486;P18464;P30490;P30491;P30492;P30493;P30495;P18465;P10319;Q29940;Q29836;P30498;Q31610;Q29718;P04222;Q95604 |           |         |         |         |          |             |     |            |          |          |
| 499 | QPWEEKTSY   | 1      | 1          | P49961                                                                                                                                                           |           | 2,219E7 | 0,003   | 0,05851 | 19       | 5,356432155 | 2   | 1280,61821 | 1,90     | 97,04    |
| 500 | AIYKTPPGIQK | 1      | 1          | Q6W2J9                                                                                                                                                           |           | 3,507E6 | 0,003   | 0,06011 | 14       | 6,974571967 | 2   | 1215,71355 | 3,22     | 57,03    |
| 501 | KLYEMILKR   | 1      | 1          | P56559                                                                                                                                                           |           | 2,279E6 | 0,003   | 0,06502 | 13       | 4,208955831 | 2   | 1193,71184 | 3,61     | 75,14    |
| 502 | LPVAKDVSY   | 1      | 1          | Q16851                                                                                                                                                           |           | 1,120E7 | 0,004   | 0,06737 | 51       | 0,002500008 | 2   | 991,54827  | 2,37     | 75,28    |
| 503 | AVYSHVIQK   | 1      | 1          | P20132                                                                                                                                                           |           | 7,615E6 | 0,004   | 0,06582 | 45       | 0,006010713 | 2   | 1044,58489 | 1,15     | 46,62    |
| 504 | AVMGAYVLLK  | 7      | 1          | Q9BY50                                                                                                                                                           |           | 2,152E5 | 0,004   | 0,06684 | 45       | 0,004535268 | 2   | 1064,61699 | -0,31    | 110,94   |
| 505 | KVFERAVQY   | 1      | 1          | Q14690                                                                                                                                                           |           | 1,416E7 | 0,004   | 0,06579 | 44       | 0,010623969 | 2   | 1139,62615 | 4,68     | 59,46    |
| 506 | FNSHVHVEY   | 1      | 1          | O43150                                                                                                                                                           |           | 6,976E6 | 0,004   | 0,06559 | 41       | 0,021086881 | 2   | 1131,52397 | 1,92     | 60,94    |
| 507 | VmAPRTLIL   | 11     | 8          | P04222;P30504;Q29963;P30508;P30510;Q29960;Q9TNN7;P30505;P30443;P04439;P13746;P16188;P10314;P30455;P30459                                                         | M2        | 7,149E7 | 0,004   | 0,06773 | 32       | 0,109755735 | 2   | 1029,61162 | -0,93    | 101,07   |
| 508 | HPGFKDPVY   | 1      | 1          | P00439                                                                                                                                                           |           | 7,852E7 | 0,004   | 0,06751 | 31       | 0,331847305 | 2   | 1059,52873 | 2,73     | 63,23    |
| 509 | KVLDAIQEK   | 1      | 1          | Q9NTJ3                                                                                                                                                           |           | 4,504E6 | 0,004   | 0,06717 | 28       | 0,282357002 | 2   | 1156,69621 | 2,21     | 77,96    |
| 510 | SVYSPSGPVNR | 1      | 1          | Q9NS56                                                                                                                                                           |           | 9,128E6 | 0,004   | 0,06658 | 24       | 1,60363642  | 2   | 1162,58476 | -0,33    | 57,90    |
| 511 | LPWNITVHF   | 1      | 1          | Q9H1Y0                                                                                                                                                           |           | 1,151E6 | 0,004   | 0,06624 | 17       | 5,792315053 | 2   | 1126,60613 | 1,50     | 142,65   |
| 512 | MYDAAKLLY   | 2      | 1          | Q00610                                                                                                                                                           |           | 2,882E6 | 0,005   | 0,07097 | 51       | 0,0033832   | 2   | 1087,55315 | 3,56     | 110,97   |

| #   | Sequence    | # PSMs | # Proteins | Protein Group Accessions                                                             | Mod. (ox) | Area    | q-Value | PEP     | IonScore | Exp. Value  | Ch. | MH+ [Da]   | ΔM [ppm] | RT [min] |
|-----|-------------|--------|------------|--------------------------------------------------------------------------------------|-----------|---------|---------|---------|----------|-------------|-----|------------|----------|----------|
| 513 | LPAGWILSH   | 1      | 1          | P10176                                                                               |           | 1,355E6 | 0,005   | 0,07028 | 50       | 0,001129198 | 2   | 993,55370  | 2,04     | 115,92   |
| 514 | GPGSRISSSFS | 1      | 1          | P05787                                                                               |           | 6,983E6 | 0,005   | 0,07183 | 49       | 0,004808194 | 2   | 1168,56340 | 3,48     | 58,73    |
| 515 | VQSNARLLY   | 1      | 1          | P35869                                                                               |           | 0,000E0 | 0,005   | 0,07121 | 44       | 0,01056081  | 2   | 1063,59136 | 1,74     | 72,50    |
| 516 | RPVPLEQTY   | 1      | 1          | O75643                                                                               |           | 2,058E7 | 0,005   | 0,06869 | 43       | 0,018396129 | 2   | 1102,59087 | 1,54     | 70,82    |
| 517 | IPDKFVVGY   | 1      | 1          | P00492                                                                               |           | 1,947E7 | 0,005   | 0,07224 | 41       | 0,022201038 | 2   | 1037,56938 | 2,63     | 103,75   |
| 518 | IAVATLHK    | 1      | 1          | Q9P267                                                                               |           | 5,111E5 | 0,005   | 0,07127 | 40       | 0,008383446 | 2   | 852,53008  | -0,15    | 81,24    |
| 519 | RLGDSQLVK   | 2      | 1          | Q16531                                                                               |           | 3,226E7 | 0,005   | 0,07311 | 34       | 0,126265355 | 2   | 1015,58843 | -1,08    | 47,68    |
| 520 | FVQmMTAK    | 4      | 1          | P62158                                                                               | M4        | 1,241E7 | 0,005   | 0,06856 | 34       | 0,119074389 | 2   | 971,46941  | 0,48     | 50,16    |
| 521 | SAEEGYRTY   | 1      | 1          | Q96QU6                                                                               |           | 9,591E5 | 0,005   | 0,07295 | 31       | 0,156067098 | 2   | 1075,46855 | -0,51    | 48,67    |
| 522 | NPPKAPWSLL  | 1      | 1          | P52630                                                                               |           | 2,336E7 | 0,005   | 0,06871 | 31       | 0,155869419 | 2   | 1122,63298 | 2,07     | 122,03   |
| 523 | VPYHGEVPVSL | 1      | 1          | O15020                                                                               |           | 1,019E7 | 0,005   | 0,07303 | 30       | 0,313535683 | 2   | 1196,63408 | 2,54     | 99,62    |
| 524 | RLYDAYELK   | 1      | 1          | P08758                                                                               |           | 9,843E6 | 0,005   | 0,07112 | 30       | 0,383115281 | 2   | 1170,61992 | 3,88     | 74,38    |
| 525 | GLHGVTFGY   | 1      | 1          | Q8NE71                                                                               |           | 1,888E7 | 0,005   | 0,0699  | 29       | 0,328107931 | 2   | 950,47490  | 1,93     | 93,24    |
| 526 | KLYEmILKR   | 2      | 1          | P56559                                                                               | M5        | 9,862E6 | 0,005   | 0,07136 | 29       | 0,139823354 | 2   | 1209,70708 | 3,83     | 61,89    |
| 527 | RVLPPPFTH   | 1      | 1          | Q9BVJ6                                                                               |           | 1,656E5 | 0,005   | 0,07038 | 29       | 0,417008928 | 2   | 1129,61455 | -0,68    | 87,78    |
| 528 | SIGQVFLK    | 1      | 1          | Q9Y3B3                                                                               |           | 5,543E6 | 0,005   | 0,07042 | 29       | 0,145597538 | 2   | 1004,61504 | 1,09     | 114,13   |
| 529 | RPAFFAERL   | 1      | 1          | P20073                                                                               |           | 1,335E7 | 0,005   | 0,07271 | 27       | 0,474084252 | 2   | 1106,61370 | 2,80     | 84,41    |
| 530 | GSHSmRYFYT  | 2      | 35         | P01891;P10316;P13746;P18462;P30450;P30453;P30456;P30457;P01889;P30461;P30462;P30464; | M5        | 5,009E7 | 0,005   | 0,07214 | 27       | 0,383059149 | 2   | 1264,54558 | 3,18     | 53,67    |



| #   | Sequence    | # PSMs | # Proteins | Protein Group Accessions                                                                                                                                         | Mod. (ox) | Area    | q-Value | PEP     | IonScore | Exp. Value  | Ch. | MH+ [Da]   | ΔM [ppm] | RT [min] |
|-----|-------------|--------|------------|------------------------------------------------------------------------------------------------------------------------------------------------------------------|-----------|---------|---------|---------|----------|-------------|-----|------------|----------|----------|
|     |             |        |            | P30685;Q95365;P30475;P30480;P30481;P30484;P30485;P30486;P18464;P30490;P30491;P30492;P30493;P30495;P18465;P10319;Q29940;Q29836;P30498;Q31610;Q29718;P04222;Q95604 |           |         |         |         |          |             |     |            |          |          |
| 531 | LPDLRPWTSL  | 1      | 1          | Q03519                                                                                                                                                           |           | 9,802E6 | 0,005   | 0,06837 | 24       | 0,885910454 | 2   | 1197,66692 | 3,53     | 139,59   |
| 532 | AVVNVKPLTGK | 1      | 1          | Q8WUH6                                                                                                                                                           |           | 1,140E6 | 0,005   | 0,07262 | 23       | 0,396039557 | 2   | 1125,70293 | 3,42     | 54,94    |
| 533 | YPAYLGARL   | 1      | 1          | P38606                                                                                                                                                           |           | 3,961E6 | 0,005   | 0,07293 | 21       | 1,12914272  | 2   | 1023,56352 | 1,27     | 97,93    |
| 534 | FVYEPKEQK   | 1      | 1          | Q16666                                                                                                                                                           |           | 5,393E6 | 0,005   | 0,07171 | 18       | 6,984296097 | 2   | 1167,60576 | 1,09     | 49,03    |
| 535 | RVFPYSVIFY  | 1      | 1          | O15118                                                                                                                                                           |           | 1,369E7 | 0,005   | 0,07251 | 15       | 15,67709849 | 2   | 1177,60832 | 3,60     | 129,53   |
| 536 | LPIESNPHSF  | 1      | 1          | Q8N3C0                                                                                                                                                           |           | 3,679E6 | 0,005   | 0,06959 | 14       | 13,45054736 | 2   | 1140,57146 | 2,65     | 83,81    |
| 537 | LPHDPDSY    | 1      | 1          | Q9P217                                                                                                                                                           |           | 1,568E7 | 0,005   | 0,07029 | 13       | 16,30150036 | 2   | 1056,50237 | 2,54     | 84,34    |
| 538 | TPTGIKVVm   | 2      | 1          | Q9Y5R8                                                                                                                                                           | M9        | 1,095E7 | 0,006   | 0,07624 | 59       | 0,000460461 | 2   | 961,53716  | -1,64    | 64,48    |
| 539 | LPDPIIHL    | 1      | 1          | Q7Z7G8                                                                                                                                                           |           | 3,511E6 | 0,006   | 0,0782  | 48       | 0,001767947 | 2   | 1030,63384 | 4,12     | 138,57   |
| 540 | KASEVFLQR   | 1      | 1          | Q9H0A0                                                                                                                                                           |           | 4,556E6 | 0,006   | 0,07835 | 47       | 0,005498887 | 2   | 1077,60942 | 3,95     | 53,26    |
| 541 | LLAKVFITK   | 1      | 1          | Q9H9Q4                                                                                                                                                           |           | 1,145E5 | 0,006   | 0,07385 | 47       | 0,00019286  | 2   | 1032,68083 | -0,77    | 77,92    |
| 542 | APVKPGPAL   | 1      | 1          | Q9UBP4                                                                                                                                                           |           | 3,294E7 | 0,006   | 0,07485 | 47       | 0,002359449 | 2   | 849,52098  | 1,96     | 56,89    |
| 543 | GVMDRGYSY   | 5      | 1          | P28074                                                                                                                                                           |           | 2,079E5 | 0,006   | 0,08226 | 46       | 0,005115166 | 2   | 1047,45635 | -0,09    | 76,08    |
| 544 | ALSDLALHF   | 1      | 1          | P50991                                                                                                                                                           |           | 5,216E6 | 0,006   | 0,07914 | 43       | 0,013002105 | 2   | 986,53246  | 1,88     | 132,60   |
| 545 | SIFKQPVTK   | 1      | 2          | Q9UBB5;O95983                                                                                                                                                    |           | 3,753E7 | 0,006   | 0,07654 | 42       | 0,010049135 | 2   | 1047,62285 | 2,96     | 52,76    |

| #   | Sequence    | # PSMs | # Proteins | Protein Group Accessions | Mod. (ox) | Area    | q-Value | PEP     | IonScore | Exp. Value  | Ch. | MH+ [Da]   | ΔM [ppm] | RT [min] |
|-----|-------------|--------|------------|--------------------------|-----------|---------|---------|---------|----------|-------------|-----|------------|----------|----------|
| 546 | KIFSGVFK    | 3      | 1          | Q6DK11                   |           | 2,771E5 | 0,006   | 0,07597 | 40       | 0,011934721 | 2   | 1024,61882 | -0,20    | 77,68    |
| 547 | IFDGNVAHI   | 1      | 1          | P46939                   |           | 1,545E7 | 0,006   | 0,07331 | 39       | 0,035940534 | 2   | 985,51262  | 2,46     | 97,02    |
| 548 | KPYQGSAGF   | 1      | 1          | P22670                   |           | 5,193E6 | 0,006   | 0,08349 | 39       | 0,041281812 | 2   | 954,47081  | 2,95     | 51,86    |
| 549 | KPAGPPGILAL | 6      | 1          | P35579                   |           | 2,315E8 | 0,006   | 0,07752 | 38       | 0,010443302 | 2   | 1033,63970 | -0,79    | 107,70   |
| 550 | LPQDVILKF   | 1      | 1          | Q96GQ7                   |           | 1,352E7 | 0,006   | 0,07944 | 37       | 0,037962682 | 2   | 1072,64287 | 2,53     | 126,97   |
| 551 | IVAKHTSAL   | 1      | 2          | Q9Y490;Q9Y4G6            |           | 2,335E7 | 0,006   | 0,07693 | 36       | 0,034146846 | 2   | 939,56352  | 1,38     | 32,23    |
| 552 | LPSFLRAL    | 1      | 1          | O95456                   |           | 2,905E6 | 0,006   | 0,07751 | 36       | 0,012340137 | 2   | 1013,61595 | 1,65     | 121,94   |
| 553 | SPEETRAAL   | 1      | 1          | P78549                   |           | 4,989E6 | 0,006   | 0,07887 | 35       | 0,142698022 | 2   | 973,49498  | 0,03     | 49,47    |
| 554 | KLHDETLTY   | 1      | 2          | Q9NZI7;Q12800            |           | 8,592E6 | 0,006   | 0,07475 | 35       | 0,154816792 | 2   | 1119,57195 | 3,44     | 57,70    |
| 555 | NVYEVVNPK   | 1      | 1          | Q86YQ8                   |           | 4,281E6 | 0,006   | 0,08337 | 33       | 0,261764263 | 2   | 1061,56218 | -0,41    | 68,59    |
| 556 | ATYHGSFSTK  | 4      | 1          | P12111                   |           | 2,910E5 | 0,006   | 0,08344 | 33       | 0,167805873 | 2   | 1098,52068 | -0,72    | 34,53    |
| 557 | GLEAIQRTPK  | 1      | 1          | P61769                   |           | 3,315E6 | 0,006   | 0,08177 | 33       | 0,1095344   | 2   | 1112,64409 | 1,62     | 50,72    |
| 558 | AVAIKAmAK   | 2      | 2          | P63241;Q6IS14            | M7        | 5,703E7 | 0,006   | 0,08008 | 32       | 0,100937808 | 2   | 918,54442  | 0,28     | 40,70    |
| 559 | FPPREIVTY   | 3      | 1          | Q13409                   |           | 5,285E6 | 0,006   | 0,07443 | 32       | 0,203678393 | 2   | 1121,60198 | 2,64     | 97,70    |
| 560 | IVDGNKMTL   | 1      | 1          | O43707                   |           | 2,644E6 | 0,006   | 0,0818  | 31       | 0,328041542 | 2   | 1061,56938 | 3,17     | 77,14    |
| 561 | HINGRVLYY   | 8      | 1          | Q13751                   |           | 3,698E7 | 0,006   | 0,07623 | 31       | 0,315587855 | 2   | 1134,60515 | -0,28    | 63,64    |
| 562 | YPSETTVKY   | 2      | 1          | P11047                   |           | 7,272E7 | 0,006   | 0,07876 | 31       | 0,279107855 | 2   | 1087,53179 | 1,06     | 66,01    |
| 563 | RTFGQGTKL   | 1      | 1          | P01593                   |           | 6,951E6 | 0,006   | 0,08185 | 29       | 0,28761357  | 2   | 1007,56377 | 0,46     | 43,68    |

| #   | Sequence    | # PSMs | # Proteins | Protein Group Accessions | Mod. (ox) | Area    | q-Value | PEP     | IonScore | Exp. Value  | Ch. | MH+ [Da]   | $\Delta$ M [ppm] | RT [min] |
|-----|-------------|--------|------------|--------------------------|-----------|---------|---------|---------|----------|-------------|-----|------------|------------------|----------|
| 564 | ALFSRIFGK   | 1      | 1          | P84085                   |           | 6,779E6 | 0,006   | 0,07852 | 29       | 0,096744081 | 2   | 1038,61174 | 2,13             | 101,92   |
| 565 | FPAGKVPAF   | 1      | 1          | P26641                   |           | 1,134E7 | 0,006   | 0,07487 | 29       | 0,348134627 | 2   | 933,52074  | 1,52             | 96,46    |
| 566 | SINDGFHVY   | 1      | 1          | Q04771                   |           | 1,281E7 | 0,006   | 0,07862 | 29       | 0,429959075 | 2   | 1051,48747 | 2,96             | 94,99    |
| 567 | DIYKRFLF    | 1      | 1          | Q5H8A3                   |           | 1,105E6 | 0,006   | 0,07369 | 28       | 0,43805794  | 2   | 1101,60881 | -0,34            | 133,26   |
| 568 | HPNDDDVHF   | 1      | 1          | Q8IZH2                   |           | 1,755E7 | 0,006   | 0,07355 | 28       | 0,170371639 | 2   | 1095,45305 | 3,65             | 53,87    |
| 569 | RSNEHIREL   | 1      | 1          | P50995                   |           | 2,171E7 | 0,006   | 0,08335 | 28       | 0,492216163 | 2   | 1153,60918 | 1,64             | 30,63    |
| 570 | RLYQHAVEY   | 1      | 1          | Q9UN37                   |           | 2,098E7 | 0,006   | 0,08023 | 28       | 0,793589259 | 2   | 1178,59990 | 3,90             | 55,13    |
| 571 | KTFPNTIEH   | 1      | 1          | Q9NUA8                   |           | 1,046E7 | 0,006   | 0,07683 | 28       | 0,705849208 | 2   | 1086,55876 | 0,82             | 49,17    |
| 572 | GLYEFFRAK   | 1      | 1          | Q8IWX8                   |           | 1,515E5 | 0,006   | 0,07824 | 27       | 0,691846379 | 2   | 1130,59868 | -0,59            | 97,76    |
| 573 | SISDKFFQK   | 1      | 1          | Q9BQS7                   |           | 1,854E7 | 0,006   | 0,07432 | 27       | 0,696951862 | 2   | 1099,58037 | 1,90             | 73,96    |
| 574 | RVWDVESGSLK | 1      | 1          | Q9GZL7                   |           | 9,347E6 | 0,006   | 0,08335 | 27       | 0,88381211  | 2   | 1275,67241 | 2,48             | 75,75    |
| 575 | SLYHRVLLY   | 1      | 1          | Q5TH69                   |           | 4,983E6 | 0,006   | 0,07905 | 26       | 0,52581804  | 2   | 1163,66167 | 3,86             | 87,63    |
| 576 | ATYSVGMQK   | 2      | 2          | A8MT19;Q8IUC4            |           | 4,099E7 | 0,006   | 0,08266 | 26       | 0,836703188 | 2   | 984,48522  | 3,34             | 52,46    |
| 577 | NPLQKDPQY   | 1      | 1          | Q15435                   |           | 1,431E7 | 0,006   | 0,07706 | 26       | 1,156085038 | 2   | 1102,55412 | 1,22             | 57,55    |
| 578 | RVFPWFSVK   | 1      | 1          | Q03164                   |           | 5,591E6 | 0,006   | 0,08167 | 25       | 0,622244208 | 2   | 1165,65422 | 2,14             | 111,19   |
| 579 | HPVFQQESF   | 2      | 1          | P16455                   |           | 1,048E7 | 0,006   | 0,07681 | 25       | 1,097418137 | 2   | 1118,52922 | 2,37             | 82,39    |
| 580 | APLPDGRSL   | 1      | 1          | Q15648                   |           | 1,587E7 | 0,006   | 0,0815  | 25       | 0,894805288 | 2   | 925,51232  | 2,27             | 75,50    |
| 581 | FPNIVIKGSEL | 1      | 1          | Q6P2Q9                   |           | 2,468E6 | 0,006   | 0,07881 | 25       | 0,906449412 | 2   | 1216,69682 | 2,60             | 118,36   |

| #   | Sequence    | # PSMs | # Proteins | Protein Group Accessions | Mod. (ox) | Area    | q-Value | PEP     | IonScore | Exp. Value  | Ch. | MH+ [Da]   | ΔM [ppm] | RT [min] |
|-----|-------------|--------|------------|--------------------------|-----------|---------|---------|---------|----------|-------------|-----|------------|----------|----------|
| 582 | KLIDIFQKY   | 1      | 1          | Q92484                   |           | 2,715E6 | 0,006   | 0,0738  | 24       | 0,48906614  | 2   | 1167,68120 | 3,37     | 110,18   |
| 583 | KPSSWLRTL   | 1      | 1          | P12755                   |           | 1,541E7 | 0,006   | 0,08219 | 24       | 1,097517994 | 2   | 1087,62676 | 0,79     | 79,51    |
| 584 | SLAERSSLLQK | 1      | 1          | Q9UPN3                   |           | 6,841E6 | 0,006   | 0,07387 | 22       | 1,503141887 | 2   | 1231,70281 | 1,85     | 58,19    |
| 585 | ALYDATYETK  | 1      | 2          | P23528;Q9Y281            |           | 2,713E6 | 0,006   | 0,08058 | 22       | 1,845659152 | 2   | 1174,56609 | 2,91     | 73,76    |
| 586 | KVIDRILYK   | 1      | 1          | O75533                   |           | 4,429E6 | 0,006   | 0,07996 | 22       | 0,204432866 | 2   | 1147,72331 | 3,06     | 62,61    |
| 587 | APFDWKILY   | 1      | 1          | Q96RK4                   |           | 7,136E5 | 0,006   | 0,07762 | 22       | 2,04139068  | 2   | 1152,61394 | 4,41     | 144,54   |
| 588 | TAVIDHHNY   | 1      | 1          | P39656                   |           | 2,644E7 | 0,006   | 0,07818 | 22       | 1,841045515 | 2   | 1069,50823 | 1,94     | 42,38    |
| 589 | HPNSAILHY   | 1      | 1          | A5YKK6                   |           | 5,214E6 | 0,006   | 0,08336 | 22       | 2,445285529 | 2   | 1164,61650 | 0,40     | 75,58    |
| 590 | TPYEGQRSY   | 1      | 1          | Q92900                   |           | 7,381E6 | 0,006   | 0,0747  | 21       | 1,731756449 | 2   | 1100,50310 | 2,15     | 46,88    |
| 591 | KTYEVSLREK  | 1      | 1          | Q16531                   |           | 1,976E6 | 0,006   | 0,08118 | 21       | 2,380385405 | 2   | 1252,68889 | -0,58    | 42,70    |
| 592 | HPDEKSIITY  | 16     | 1          | Q01082                   |           | 2,212E8 | 0,006   | 0,07705 | 20       | 4,995794255 | 2   | 1202,60686 | 1,37     | 69,75    |
| 593 | VPVAEIKIY   | 1      | 1          | Q6VY07                   |           | 4,822E5 | 0,006   | 0,07791 | 19       | 2,539483407 | 2   | 1031,61284 | -0,74    | 104,08   |
| 594 | YPLEDATHIAL | 1      | 1          | Q9NXN4                   |           | 5,002E6 | 0,006   | 0,07483 | 18       | 5,355735184 | 2   | 1242,64067 | 3,34     | 122,23   |
| 595 | SPQPDGKVVY  | 1      | 1          | Q9BSV6                   |           | 4,201E7 | 0,006   | 0,07572 | 17       | 9,230998564 | 2   | 1089,55998 | 2,24     | 59,92    |
| 596 | KPGSQFLYSTF | 1      | 1          | P83111                   |           | 1,209E7 | 0,006   | 0,08082 | 16       | 10,66562013 | 2   | 1274,64568 | 3,20     | 107,78   |
| 597 | APYRPPDISL  | 1      | 1          | Q9HCD6                   |           | 9,669E6 | 0,008   | 0,0901  | 44       | 0,012161141 | 2   | 1128,60845 | 3,20     | 102,21   |
| 598 | KITVPASQKL  | 1      | 1          | Q8WV28                   |           | 1,624E7 | 0,008   | 0,08859 | 43       | 0,00611542  | 2   | 1084,67339 | 0,80     | 57,54    |
| 599 | KSNSIIVSPR  | 1      | 1          | P07992                   |           | 0,000E0 | 0,008   | 0,08447 | 43       | 0,014032065 | 2   | 1100,64311 | 0,76     | 46,47    |

| #   | Sequence    | # PSMs | # Proteins | Protein Group Accessions | Mod. (ox) | Area    | q-Value | PEP     | IonScore | Exp. Value  | Ch. | MH+ [Da]   | ΔM [ppm] | RT [min] |
|-----|-------------|--------|------------|--------------------------|-----------|---------|---------|---------|----------|-------------|-----|------------|----------|----------|
| 600 | RPILTIITL   | 7      | 1          | P04637                   |           | 2,495E6 | 0,008   | 0,0877  | 38       | 0,004348924 | 2   | 1039,68657 | -0,84    | 137,77   |
| 601 | YARDETEFY   | 1      | 1          | P18077                   |           | 3,544E7 | 0,008   | 0,0853  | 37       | 0,036542247 | 2   | 1193,51531 | 3,63     | 76,33    |
| 602 | QTYSTEPNNLK | 1      | 1          | P46779                   |           | 5,899E5 | 0,008   | 0,08813 | 37       | 0,107695894 | 2   | 1294,63237 | 3,84     | 51,51    |
| 603 | GTmTGMLYK   | 3      | 2          | Q5SRD1;O14925            | M3        | 3,429E7 | 0,008   | 0,08554 | 36       | 0,064156758 | 2   | 1017,47771 | 3,24     | 58,77    |
| 604 | VPLDERIVF   | 15     | 1          | Q96TA1                   |           | 6,324E7 | 0,008   | 0,0892  | 36       | 0,110407949 | 2   | 1087,61455 | -0,12    | 123,40   |
| 605 | mLDPLEVHL   | 1      | 1          | Q6P2Q9                   | M1        | 2,387E6 | 0,008   | 0,08503 | 35       | 0,112337461 | 2   | 1082,55889 | 3,48     | 122,91   |
| 606 | IPIGIDKAL   | 2      | 1          | Q13451                   |           | 3,594E7 | 0,008   | 0,08815 | 34       | 0,02925105  | 2   | 939,58696  | -0,47    | 107,82   |
| 607 | SPLKLLTsm   | 1      | 1          | P51654                   | M9        | 3,147E6 | 0,008   | 0,08856 | 34       | 0,112555322 | 2   | 1005,56828 | 3,32     | 94,95    |
| 608 | APAAWLRSA   | 1      | 1          | P24347                   |           | 3,432E6 | 0,008   | 0,08837 | 34       | 0,095729837 | 2   | 1013,55486 | 2,08     | 82,01    |
| 609 | KPAFFAEKL   | 2      | 1          | P04083                   |           | 3,007E5 | 0,008   | 0,08521 | 33       | 0,110801393 | 2   | 1050,59783 | -0,45    | 75,15    |
| 610 | DVIRLImQY   | 2      | 1          | Q2TAY7                   | M7        | 8,511E6 | 0,008   | 0,08779 | 33       | 0,154466858 | 2   | 1166,62663 | 2,38     | 127,59   |
| 611 | VPPTAISHF   | 1      | 1          | Q9NR30                   |           | 1,743E7 | 0,008   | 0,08953 | 33       | 0,093788721 | 2   | 968,52153  | 1,55     | 82,04    |
| 612 | VLFAGQHIAK  | 1      | 1          | P21333                   |           | 6,035E6 | 0,008   | 0,08654 | 33       | 0,04322424  | 2   | 1083,63518 | 3,86     | 63,08    |
| 613 | YLNEKAVSY   | 1      | 1          | Q13492                   |           | 1,885E7 | 0,008   | 0,08733 | 32       | 0,168408541 | 2   | 1086,54827 | 1,51     | 69,52    |
| 614 | VPASFRLQm   | 1      | 1          | Q9BTE3                   | M9        | 2,404E6 | 0,008   | 0,08916 | 31       | 0,320796441 | 2   | 1064,55730 | 1,42     | 81,27    |
| 615 | LPPPVHVDY   | 1      | 1          | Q13889                   |           | 3,862E7 | 0,008   | 0,0869  | 31       | 0,309752433 | 2   | 1036,54924 | 2,89     | 90,10    |
| 616 | HVAAPYIAK   | 1      | 1          | Q9H2P0                   |           | 1,032E7 | 0,008   | 0,08459 | 31       | 0,188976845 | 2   | 969,55205  | 0,40     | 49,33    |
| 617 | GLYKAPLSK   | 1      | 1          | Q8NBM4                   |           | 2,287E7 | 0,008   | 0,09015 | 31       | 0,140274431 | 2   | 976,58599  | 3,43     | 53,41    |

| #   | Sequence     | # PSMs | # Proteins | Protein Group Accessions | Mod. (ox) | Area    | q-Value | PEP     | IonScore | Exp. Value  | Ch. | MH+ [Da]   | ΔM [ppm] | RT [min] |
|-----|--------------|--------|------------|--------------------------|-----------|---------|---------|---------|----------|-------------|-----|------------|----------|----------|
| 618 | KPSDVMLVHF   | 1      | 1          | Q8WWM7                   |           | 3,774E6 | 0,008   | 0,08553 | 31       | 0,34709979  | 2   | 1172,61638 | 2,63     | 102,06   |
| 619 | RVYGGTTK     | 3      | 1          | Q8WUM4                   |           | 1,234E8 | 0,008   | 0,08701 | 29       | 0,317584504 | 2   | 994,56761  | -0,43    | 37,49    |
| 620 | APIRPDIVNF   | 1      | 1          | P36578                   |           | 1,997E7 | 0,008   | 0,0857  | 28       | 0,391280546 | 2   | 1141,63701 | 0,46     | 110,33   |
| 621 | RPITVSYAF    | 1      | 1          | Q15427                   |           | 2,512E7 | 0,008   | 0,08513 | 28       | 0,462723653 | 2   | 1053,57500 | 2,10     | 98,54    |
| 622 | VVLGQFLVLK   | 1      | 1          | O75531                   |           | 5,837E6 | 0,008   | 0,08775 | 27       | 0,033167785 | 2   | 1115,72222 | 3,10     | 135,21   |
| 623 | LPWVGKELY    | 1      | 1          | Q09161                   |           | 9,172E6 | 0,008   | 0,08655 | 27       | 0,68542921  | 2   | 1104,61235 | 3,17     | 117,73   |
| 624 | LPVLSTDKF    | 1      | 1          | Q7L5N1                   |           | 4,078E6 | 0,008   | 0,08806 | 26       | 0,590171134 | 2   | 1019,57878 | 1,53     | 104,56   |
| 625 | RAmAKRTKD    | 1      | 1          | Q68D10                   | M3        | 2,960E6 | 0,008   | 0,08548 | 26       | 0,696161014 | 2   | 1092,59758 | 3,00     | 35,79    |
| 626 | FVELGTQPATQ  | 2      | 1          | P02652                   |           | 4,743E7 | 0,008   | 0,08915 | 24       | 1,992076261 | 2   | 1190,60759 | 1,98     | 97,46    |
| 627 | HPAIALREY    | 1      | 1          | P10155                   |           | 1,638E7 | 0,008   | 0,08456 | 24       | 1,069605999 | 2   | 1069,57915 | 0,19     | 64,96    |
| 628 | GLYIHRNK     | 1      | 1          | P50750                   |           | 3,677E4 | 0,008   | 0,08684 | 24       | 1,465505753 | 2   | 1163,63335 | 1,14     | 37,55    |
| 629 | NWRPRFKY     | 3      | 1          | Q9UP95                   |           | 1,403E5 | 0,008   | 0,08653 | 23       | 1,496052894 | 2   | 1166,62346 | 1,41     | 134,78   |
| 630 | YWGEIISQQY   | 1      | 1          | P14735                   |           | 4,012E7 | 0,008   | 0,08557 | 22       | 2,374462626 | 2   | 1286,61052 | 4,13     | 134,74   |
| 631 | RQIPYTMmK    | 1      | 1          | Q00325                   | M8        | 1,011E7 | 0,008   | 0,08531 | 21       | 3,338428799 | 2   | 1183,59941 | 2,66     | 51,41    |
| 632 | MPLPGTKALPSm | 1      | 1          | Q9UMZ2                   | M12       | 0,000E0 | 0,008   | 0,08958 | 20       | 4,120099194 | 2   | 1258,65569 | 1,76     | 90,77    |
| 633 | SFmDPASALY   | 1      | 1          | P28070                   | M3        | 4,625E6 | 0,008   | 0,08808 | 20       | 1,804149429 | 2   | 1117,49040 | 2,97     | 120,98   |
| 634 | VPEEGATHVY   | 1      | 1          | Q9NQ31                   |           | 6,594E7 | 0,008   | 0,08878 | 13       | 15,90668631 | 2   | 1158,54766 | 4,34     | 58,61    |
| 635 | AGQNDPLK     | 1      | 1          | P27816                   |           | 1,226E7 | 0,009   | 0,1009  | 55       | 0,001007809 | 2   | 842,43706  | 0,42     | 33,12    |

| #   | Sequence               | # PSMs | # Proteins | Protein Group Accessions | Mod. (ox) | Area    | q-Value | PEP     | IonScore | Exp. Value  | Ch. | MH+ [Da]   | ΔM [ppm] | RT [min] |
|-----|------------------------|--------|------------|--------------------------|-----------|---------|---------|---------|----------|-------------|-----|------------|----------|----------|
| 636 | SVAQLLSK               | 1      | 1          | P29375                   |           | 1,506E7 | 0,009   | 0,09882 | 49       | 0,001870189 | 2   | 958,59551  | 2,40     | 99,54    |
| 637 | RPGGLGSSSL             | 16     | 1          | P08729                   |           | 1,003E9 | 0,009   | 0,09208 | 45       | 0,014625555 | 2   | 930,49993  | -0,48    | 53,50    |
| 638 | VVQTVKASY              | 1      | 1          | P35221                   |           | 4,696E6 | 0,009   | 0,1083  | 45       | 0,007183141 | 2   | 994,56041  | 3,63     | 53,42    |
| 639 | ATVAVPLVGK             | 1      | 1          | Q9BUN8                   |           | 1,985E5 | 0,009   | 0,1039  | 44       | 0,003464094 | 2   | 954,59776  | -0,56    | 91,38    |
| 640 | HPHQNLTIATY            | 1      | 1          | Q2TAY7                   |           | 1,476E7 | 0,009   | 0,09831 | 43       | 0,019818203 | 2   | 1193,61199 | 4,85     | 59,46    |
| 641 | QPYTDGVRm              | 1      | 1          | P14923                   | M9        | 4,804E6 | 0,009   | 0,09737 | 43       | 0,016220925 | 2   | 1082,49468 | 1,03     | 48,27    |
| 642 | SVSNVVITK              | 1      | 1          | P42566                   |           | 2,379E5 | 0,009   | 0,09182 | 42       | 0,013964926 | 2   | 946,55675  | -0,07    | 56,35    |
| 643 | VSFPIGIYK              | 1      | 1          | Q8TCA0                   |           | 2,642E7 | 0,009   | 0,09874 | 41       | 0,012961866 | 2   | 1023,58989 | 2,45     | 113,38   |
| 644 | HPTDITSLDQY            | 1      | 1          | P14625                   |           | 6,828E6 | 0,009   | 0,1079  | 41       | 0,028831968 | 2   | 1289,60454 | 2,86     | 93,92    |
| 645 | DAIRLAVSY              | 4      | 2          | Q9UBK7;Q9UNT1            |           | 3,642E5 | 0,009   | 0,09789 | 40       | 0,035552321 | 2   | 1007,55168 | -0,38    | 115,46   |
| 646 | YADPVNAHY              | 1      | 1          | O95758                   |           | 3,356E6 | 0,009   | 0,1041  | 39       | 0,033420684 | 2   | 1049,47063 | 1,84     | 70,37    |
| 647 | AVLKAVQQY              | 1      | 2          | Q9P0M2;O43687            |           | 6,483E6 | 0,009   | 0,09303 | 39       | 0,029102584 | 2   | 1019,59020 | 1,72     | 68,80    |
| 648 | ASINRIYGF              | 1      | 3          | P36873;P62140;P62136     |           | 3,751E7 | 0,009   | 0,104   | 39       | 0,025843477 | 2   | 1040,55400 | 1,55     | 97,95    |
| 649 | SIIGRLLEV              | 1      | 1          | P62136                   |           | 2,540E7 | 0,009   | 0,1087  | 38       | 0,025514966 | 2   | 999,62193  | 2,17     | 132,72   |
| 650 | KPFDAFTDL              | 1      | 1          | P04004                   |           | 1,123E7 | 0,009   | 0,1079  | 38       | 0,05806641  | 2   | 1053,52825 | 2,90     | 121,32   |
| 651 | NAESGRGQV <sub>m</sub> | 1      | 1          | P24001                   | M10       | 2,133E5 | 0,009   | 0,1005  | 38       | 0,038015704 | 2   | 1064,48235 | 3,15     | 23,85    |
| 652 | TVRPPVAVK              | 1      | 1          | P12111                   |           | 5,642E7 | 0,009   | 0,09413 | 38       | 0,007880168 | 2   | 966,61156  | 2,10     | 47,19    |
| 653 | VPDPNVIKL              | 1      | 2          | Q9UMR2;Q9NUU7            |           | 1,854E7 | 0,009   | 0,09142 | 37       | 0,022603113 | 2   | 994,59502  | 1,82     | 101,42   |

| #   | Sequence    | # PSMs | # Proteins | Protein Group Accessions                                                             | Mod. (ox) | Area    | q-Value | PEP     | IonScore | Exp. Value  | Ch. | MH+ [Da]   | ΔM [ppm] | RT [min] |
|-----|-------------|--------|------------|--------------------------------------------------------------------------------------|-----------|---------|---------|---------|----------|-------------|-----|------------|----------|----------|
| 654 | ALAFHLISQK  | 1      | 1          | P42566                                                                               |           | 3,229E6 | 0,009   | 0,1041  | 37       | 0,030956144 | 2   | 1127,66081 | 3,20     | 86,96    |
| 655 | TNFEDRNAF   | 1      | 2          | Q96F07;Q7L576                                                                        |           | 1,955E7 | 0,009   | 0,09064 | 36       | 0,042405465 | 2   | 1113,49968 | 3,30     | 73,75    |
| 656 | ATFGTQVVEK  | 1      | 1          | P01024                                                                               |           | 2,833E6 | 0,009   | 0,1011  | 36       | 0,091556294 | 2   | 1079,57280 | -0,37    | 65,15    |
| 657 | KVGEFSGANK  | 1      | 1          | P10599                                                                               |           | 1,651E7 | 0,009   | 0,1068  | 36       | 0,101198937 | 2   | 1036,54399 | 1,69     | 30,77    |
| 658 | KVYGPVAK    | 1      | 1          | P21333                                                                               |           | 2,060E7 | 0,009   | 0,09128 | 35       | 0,060223708 | 2   | 918,53972  | -1,14    | 31,85    |
| 659 | KPIEQLLGF   | 5      | 1          | Q96DE5                                                                               |           | 1,794E7 | 0,009   | 0,09243 | 35       | 0,114912951 | 2   | 1044,60820 | -0,63    | 129,60   |
| 660 | TPLDRVTEF   | 1      | 1          | Q9UFW8                                                                               |           | 5,878E6 | 0,009   | 0,1022  | 34       | 0,199055784 | 2   | 1077,56011 | 2,37     | 102,63   |
| 661 | SVmRLTISY   | 4      | 1          | Q16665                                                                               | M3        | 1,021E7 | 0,009   | 0,1015  | 34       | 0,151416209 | 2   | 1085,56584 | -0,14    | 86,41    |
| 662 | AAMLDTVVFK  | 1      | 1          | O00487                                                                               |           | 2,886E6 | 0,009   | 0,1042  | 33       | 0,150639938 | 2   | 1094,59490 | 3,09     | 110,76   |
| 663 | IPAPTDLKF   | 1      | 1          | P02751                                                                               |           | 2,202E6 | 0,009   | 0,09637 | 33       | 0,09713942  | 2   | 1001,56780 | 1,13     | 110,25   |
| 664 | EAQPIVTKY   | 1      | 1          | Q1KMD3                                                                               |           | 2,935E7 | 0,009   | 0,104   | 33       | 0,228824197 | 2   | 1048,56780 | 0,41     | 65,52    |
| 665 | IIAEVKAQY   | 6      | 11         | P05787;P13647;O95678;P08729<br>;P02538;P04259;P48668;P35908<br>;Q5XKE5;P04264;Q9NSB2 |           | 7,970E7 | 0,009   | 0,09339 | 32       | 0,161722369 | 2   | 1034,58745 | -0,64    | 77,00    |
| 666 | APYRTQSSASL | 1      | 1          | Q96PK6                                                                               |           | 8,817E6 | 0,009   | 0,1085  | 32       | 0,300182799 | 2   | 1180,60100 | 4,48     | 52,53    |
| 667 | RTNWPNTGK   | 1      | 1          | Q6NUQ1                                                                               |           | 3,732E7 | 0,009   | 0,09493 | 32       | 0,235649653 | 2   | 1073,55058 | 1,75     | 33,46    |
| 668 | SPTKLDVTL   | 5      | 1          | P27816                                                                               |           | 8,363E5 | 0,009   | 0,1032  | 32       | 0,183072274 | 2   | 973,55614  | -0,35    | 91,20    |
| 669 | RTIAPIIGR   | 2      | 1          | Q99459                                                                               |           | 3,603E7 | 0,009   | 0,1075  | 32       | 0,024507957 | 2   | 996,63567  | 4,35     | 63,56    |
| 670 | RPGFQQTSH   | 1      | 1          | Q13443                                                                               |           | 4,645E6 | 0,009   | 0,103   | 32       | 0,263285037 | 2   | 1057,51763 | 0,21     | 28,71    |
| 671 | AVLSWKLAK   | 1      | 1          | Q7Z3B0                                                                               |           | 1,405E7 | 0,009   | 0,09464 | 31       | 0,083071582 | 2   | 1015,63036 | 0,42     | 81,06    |



| #   | Sequence      | # PSMs | # Proteins | Protein Group Accessions           | Mod. (ox) | Area    | q-Value | PEP     | IonScore | Exp. Value  | Ch. | MH+ [Da]   | ΔM [ppm] | RT [min] |
|-----|---------------|--------|------------|------------------------------------|-----------|---------|---------|---------|----------|-------------|-----|------------|----------|----------|
| 672 | APPRPGSSF     | 2      | 1          | Q86XP3                             |           | 2,757E8 | 0,009   | 0,09599 | 31       | 0,196959894 | 2   | 915,47161  | 3,57     | 52,60    |
| 673 | APKLPVAF      | 1      | 1          | Q9UDX3                             |           | 3,133E6 | 0,009   | 0,102   | 31       | 0,123277878 | 2   | 989,58519  | 3,30     | 129,93   |
| 674 | SPmSADR VVAF  | 1      | 2          | P10589;P24468                      | M3        | 1,759E7 | 0,009   | 0,09553 | 31       | 0,317778367 | 2   | 1195,57878 | 0,94     | 81,85    |
| 675 | IIFDRPLLY     | 2      | 1          | Q9UPQ8                             |           | 4,884E6 | 0,009   | 0,09122 | 31       | 0,105371287 | 2   | 1149,67107 | 3,80     | 132,19   |
| 676 | LPDLNHSQVY    | 1      | 1          | Q92900                             |           | 1,399E7 | 0,009   | 0,1007  | 31       | 0,324674216 | 2   | 1185,59453 | 3,91     | 90,76    |
| 677 | EPAQRKIlm     | 6      | 1          | Q8TB72                             | M9        | 1,292E6 | 0,009   | 0,101   | 31       | 0,243518274 | 2   | 1101,60893 | 0,34     | 133,30   |
| 678 | AVFGPDGTL LAK | 1      | 1          | Q9NQR4                             |           | 5,918E6 | 0,009   | 0,09131 | 31       | 0,267570038 | 2   | 1188,66606 | 3,11     | 106,13   |
| 679 | ImLPFRFTY     | 1      | 1          | Q96CS3                             | M2        | 1,855E6 | 0,009   | 0,09254 | 30       | 0,506565371 | 2   | 1203,62724 | 3,42     | 140,66   |
| 680 | ASLVGQTSPK    | 1      | 1          | Q9Y2X3                             |           | 6,437E6 | 0,009   | 0,09353 | 30       | 0,416843811 | 2   | 987,54601  | -0,99    | 46,01    |
| 681 | IPIALSGRDIL   | 1      | 1          | P26196                             |           | 4,066E6 | 0,009   | 0,09326 | 29       | 0,094144701 | 2   | 1167,71196 | 1,98     | 121,95   |
| 682 | YFIDSTNLKTHF  | 1      | 1          | O00488                             |           | 1,353E7 | 0,009   | 0,1047  | 29       | 0,547770826 | 3   | 1485,73944 | 1,45     | 106,73   |
| 683 | RPTDKPLRL     | 5      | 3          | P68104;Q05639;Q5VTE0               |           | 4,974E7 | 0,009   | 0,1049  | 28       | 0,107952255 | 2   | 1095,66313 | -0,21    | 40,17    |
| 684 | LPLPAPHAQY    | 1      | 1          | P42694                             |           | 4,823E6 | 0,009   | 0,0902  | 28       | 0,392387801 | 2   | 1106,60222 | 2,60     | 89,59    |
| 685 | KLAELEGALQK   | 1      | 5          | Q14533;O43790;A6NCN2;P78385;P78386 |           | 4,794E6 | 0,009   | 0,09966 | 28       | 0,366763295 | 2   | 1199,70244 | 2,47     | 71,68    |
| 686 | KILGPQGNTIK   | 1      | 1          | Q07666                             |           | 4,024E6 | 0,009   | 0,09455 | 28       | 0,16489812  | 2   | 1168,70537 | 0,41     | 47,80    |
| 687 | DPWIGKLLY     | 1      | 1          | P21673                             |           | 4,419E6 | 0,009   | 0,09605 | 28       | 0,539464174 | 2   | 1104,61284 | 3,61     | 144,33   |
| 688 | AVYENAREK     | 1      | 1          | Q75QN2                             |           | 6,130E6 | 0,009   | 0,09812 | 28       | 0,697570625 | 2   | 1079,55254 | 4,17     | 27,49    |
| 689 | YRYPTGESY     | 1      | 1          | Q16875                             |           | 3,147E6 | 0,009   | 0,1046  | 28       | 0,37093169  | 2   | 1135,50517 | -0,26    | 67,68    |

| #   | Sequence     | # PSMs | # Proteins | Protein Group Accessions | Mod. (ox) | Area    | q-Value | PEP     | IonScore | Exp. Value  | Ch. | MH+ [Da]   | $\Delta$ M [ppm] | RT [min] |
|-----|--------------|--------|------------|--------------------------|-----------|---------|---------|---------|----------|-------------|-----|------------|------------------|----------|
| 690 | APLKSkmIY    | 2      | 3          | P23528;Q9Y281;P60981     | M7        | 3,923E7 | 0,009   | 0,1051  | 27       | 0,426031643 | 2   | 1066,59636 | -0,20            | 42,89    |
| 691 | LYEVSQKLD    | 2      | 1          | Q96KP4                   |           | 7,445E6 | 0,009   | 0,09877 | 27       | 0,71102198  | 2   | 1094,57244 | -0,38            | 81,89    |
| 692 | RVFQDVAQK    | 1      | 2          | Q9UPQ3;Q96P47            |           | 7,805E6 | 0,009   | 0,1072  | 27       | 0,646405484 | 2   | 1090,60137 | 0,87             | 44,19    |
| 693 | RVAPEEHPVLL  | 1      | 3          | P60709;P63261;A5A3E0     |           | 3,808E6 | 0,009   | 0,09793 | 27       | 0,48736079  | 2   | 1259,71343 | 2,16             | 75,33    |
| 694 | KLLDDPSKQK   | 1      | 2          | Q6STE5;Q92925            |           | 1,498E7 | 0,009   | 0,102   | 27       | 0,617038216 | 2   | 1171,67204 | 3,31             | 35,19    |
| 695 | ATIRPWSTF    | 1      | 1          | Q9UI14                   |           | 4,936E6 | 0,009   | 0,1078  | 27       | 0,64166519  | 2   | 1078,57134 | 3,05             | 105,22   |
| 696 | SVLEPPLFLK   | 1      | 1          | Q5GLZ8                   |           | 1,065E7 | 0,009   | 0,09358 | 27       | 0,382631632 | 2   | 1142,68559 | 3,12             | 128,77   |
| 697 | ILDPHVLL     | 3      | 1          | Q99567                   |           | 1,519E7 | 0,009   | 0,1086  | 26       | 0,182235304 | 2   | 1018,63164 | 2,01             | 130,15   |
| 698 | LPNEGRNDY    | 1      | 1          | Q96JJ3                   |           | 2,254E6 | 0,009   | 0,1086  | 26       | 0,635008595 | 2   | 1077,49626 | 0,24             | 49,57    |
| 699 | LPQHDPVEm    | 1      | 1          | Q7Z7E8                   | M9        | 8,125E6 | 0,009   | 0,09177 | 26       | 0,855577708 | 2   | 1081,49980 | 1,37             | 58,02    |
| 700 | LPSDVPLHF    | 1      | 1          | A0AUZ9                   |           | 2,073E6 | 0,009   | 0,09902 | 26       | 0,46155859  | 2   | 1024,54741 | 1,13             | 118,79   |
| 701 | AVLPRAFTY    | 1      | 1          | P08F94                   |           | 8,273E7 | 0,009   | 0,1034  | 25       | 0,552460496 | 2   | 1037,58049 | 2,52             | 102,63   |
| 702 | VLSPADKTNVKA | 1      | 1          | P69905                   |           | 7,428E5 | 0,009   | 0,1037  | 25       | 0,905485785 | 2   | 1242,70586 | 0,46             | 48,04    |
| 703 | RLYDLPAKR    | 1      | 1          | Q8NF91                   |           | 2,488E6 | 0,009   | 0,1049  | 24       | 0,564725794 | 2   | 1131,66582 | 2,18             | 50,69    |
| 704 | IQFNPPLSEK   | 3      | 1          | Q8NB78                   |           | 2,641E7 | 0,009   | 0,09647 | 23       | 1,661570503 | 2   | 1172,63323 | 1,85             | 92,45    |
| 705 | KLAEYVITK    | 1      | 1          | Q8IVL0                   |           | 6,071E6 | 0,009   | 0,102   | 23       | 0,480856775 | 2   | 1064,63750 | 2,29             | 62,35    |
| 706 | RGNPLVVRV    | 1      | 1          | Q96CX6                   |           | 1,535E7 | 0,009   | 0,1072  | 23       | 1,07201198  | 2   | 1057,62859 | 1,90             | 79,81    |
| 707 | mVTEIRLKY    | 2      | 1          | Q15393                   | M1        | 8,777E6 | 0,009   | 0,1     | 23       | 1,337482316 | 2   | 1168,64372 | 3,61             | 74,61    |

| #   | Sequence    | # PSMs | # Proteins | Protein Group Accessions | Mod. (ox) | Area    | q-Value | PEP     | IonScore | Exp. Value  | Ch. | MH+ [Da]   | ΔM [ppm] | RT [min] |
|-----|-------------|--------|------------|--------------------------|-----------|---------|---------|---------|----------|-------------|-----|------------|----------|----------|
| 708 | KVYTHNLYY   | 1      | 1          | Q96EK5                   |           | 1,106E7 | 0,009   | 0,09884 | 22       | 2,858548245 | 2   | 1200,60881 | 3,36     | 60,31    |
| 709 | LPIPSKLLEF  | 1      | 1          | Q9Y6I7                   |           | 1,799E6 | 0,009   | 0,09058 | 21       | 0,947488464 | 2   | 1156,70207 | 3,80     | 142,27   |
| 710 | TPVLEPTKVTF | 1      | 1          | Q9ULD2                   |           | 1,777E6 | 0,009   | 0,09708 | 21       | 2,662191079 | 2   | 1231,69524 | 1,56     | 107,44   |
| 711 | YPSRAVITTM  | 1      | 1          | Q06136                   | M10       | 4,286E6 | 0,009   | 0,1044  | 21       | 3,346039359 | 2   | 1154,58867 | 1,04     | 65,29    |
| 712 | RTALNLFFK   | 1      | 1          | P53621                   |           | 1,360E7 | 0,009   | 0,09479 | 20       | 0,750842692 | 2   | 1109,64934 | 2,43     | 101,26   |
| 713 | KPFNPLLGETY | 1      | 2          | Q9BXW6;Q9H1P3            |           | 9,109E6 | 0,009   | 0,09973 | 20       | 3,773348219 | 2   | 1278,67632 | 2,66     | 111,50   |
| 714 | NPYHNEPGF   | 1      | 1          | Q9H832                   |           | 1,958E7 | 0,009   | 0,09386 | 20       | 1,590333902 | 2   | 1074,46721 | 3,02     | 63,21    |
| 715 | VLREIAEEY   | 1      | 1          | Q00341                   |           | 2,780E6 | 0,009   | 0,09838 | 20       | 4,178328936 | 2   | 1121,58696 | 2,85     | 84,89    |
| 716 | VPYRIFPY    | 1      | 1          | Q14739                   |           | 0,000E0 | 0,009   | 0,1006  | 20       | 2,741878268 | 2   | 1054,57439 | 2,22     | 114,33   |
| 717 | AVQKAIPmYK  | 1      | 1          | P36543                   | M8        | 2,721E6 | 0,009   | 0,09066 | 19       | 3,524780283 | 2   | 1164,64641 | 1,56     | 48,12    |
| 718 | KmDDLNLHY   | 2      | 1          | Q8NCJ5                   | M2        | 1,693E7 | 0,009   | 0,1012  | 18       | 4,838275131 | 2   | 1164,53899 | 3,06     | 68,91    |
| 719 | FPEQIAEKL   | 1      | 1          | Q9Y546                   |           | 1,301E7 | 0,009   | 0,09534 | 18       | 8,274691951 | 2   | 1074,58403 | 0,92     | 97,60    |
| 720 | RPDEKAlmTY  | 1      | 2          | P12814;O43707            | M8        | 9,240E6 | 0,009   | 0,09282 | 18       | 7,651174169 | 2   | 1239,60576 | 1,54     | 50,80    |
| 721 | TPVDLNKHLV  | 1      | 1          | O00443                   |           | 2,318E6 | 0,009   | 0,1027  | 18       | 7,416956152 | 2   | 1199,64372 | 1,49     | 75,23    |
| 722 | FVYPGNPLRH  | 1      | 1          | Q96EK7                   |           | 6,650E6 | 0,009   | 0,105   | 15       | 10,58379722 | 2   | 1199,63432 | 1,90     | 82,48    |
| 723 | KPFEQVKGITL | 1      | 1          | P33121                   |           | 8,764E6 | 0,009   | 0,1001  | 14       | 6,480233488 | 2   | 1259,74040 | 3,61     | 88,45    |
| 724 | DEVVQIFDKEG | 1      | 1          | P30085                   |           | 3,013E6 | 0,009   | 0,09647 | 13       | 17,02261391 | 2   | 1278,62590 | 3,61     | 110,71   |
| 725 | HPYSQALIQY  | 1      | 1          | Q7KZ85                   |           | 6,497E6 | 0,009   | 0,09544 | 13       | 26,61227385 | 2   | 1219,61467 | 3,33     | 90,73    |

| #   | Sequence    | # PSMs | # Proteins | Protein Group Accessions | Mod. (ox) | Area    | q-Value | PEP    | IonScore | Exp. Value  | Ch. | MH+ [Da]   | ΔM [ppm] | RT [min] |
|-----|-------------|--------|------------|--------------------------|-----------|---------|---------|--------|----------|-------------|-----|------------|----------|----------|
| 726 | LFYDVKLQY   | 1      | 1          | Q9NQ8T                   |           | 2,508E6 | 0,009   | 0,1048 | 12       | 22,76265003 | 2   | 1188,63323 | 2,75     | 124,45   |
| 727 | YYNGKIHAY   | 1      | 1          | O75643                   |           | 1,665E6 | 0,009   | 0,1002 | 12       | 21,91548481 | 2   | 1128,54949 | 1,96     | 50,74    |
| 728 | RPPPIGAEV   | 20     | 1          | Q07820                   |           | 1,155E9 | 0,01    | 0,1089 | 42       | 0,017288978 | 2   | 935,53063  | -0,35    | 64,52    |
| 729 | APYKSDFLKAL | 1      | 1          | Q9NZD2                   |           | 2,962E6 | 0,01    | 0,1091 | 24       | 0,868713204 | 2   | 1252,69792 | 3,41     | 98,11    |
| 730 | APSKTSLIm   | 1      | 1          | Q9H334                   | M9        | 2,560E7 | 0,011   | 0,1123 | 43       | 0,010711633 | 2   | 963,51995  | 2,02     | 54,40    |
| 731 | SIFAGQNDPLK | 1      | 1          | P27816                   |           | 1,121E7 | 0,011   | 0,1095 | 42       | 0,035985569 | 2   | 1189,62688 | 4,76     | 90,96    |
| 732 | VPVIISRAL   | 1      | 1          | Q14919                   |           | 1,940E6 | 0,011   | 0,1123 | 38       | 0,005079908 | 2   | 967,63072  | 0,82     | 102,81   |
| 733 | GLNNTIGY    | 1      | 1          | Q8TE76                   |           | 4,065E7 | 0,011   | 0,1097 | 38       | 0,078534264 | 2   | 979,52342  | 2,73     | 62,10    |
| 734 | GQYGNPLNK   | 1      | 1          | O14672                   |           | 8,336E7 | 0,011   | 0,1099 | 36       | 0,112493749 | 2   | 990,50359  | 3,27     | 54,37    |
| 735 | RTGPPMGSRF  | 1      | 1          | Q15056                   |           | 3,530E7 | 0,011   | 0,111  | 35       | 0,134892438 | 2   | 1105,55620 | -0,90    | 49,80    |
| 736 | LPSNDSSKF   | 1      | 1          | P17480                   |           | 1,489E7 | 0,011   | 0,11   | 34       | 0,176356119 | 2   | 994,48711  | 3,08     | 54,85    |
| 737 | SPAGAGTLHAL | 1      | 1          | Q8TEV9                   |           | 3,547E6 | 0,011   | 0,1106 | 34       | 0,123166996 | 2   | 994,53331  | 1,65     | 69,58    |
| 738 | FPLQPGKVATF | 1      | 1          | Q96Q05                   |           | 5,029E6 | 0,011   | 0,1119 | 34       | 0,125940738 | 2   | 1204,67681 | 3,55     | 112,79   |
| 739 | mAVYLSAGVIS | 1      | 1          | Q9H300                   | M1        | 1,288E5 | 0,011   | 0,1116 | 34       | 0,167752023 | 2   | 1126,57744 | -3,45    | 91,94    |
| 740 | GSYKNVFLAK  | 7      | 1          | P48556                   |           | 1,565E8 | 0,011   | 0,111  | 30       | 0,27658857  | 2   | 1126,62541 | -0,13    | 56,30    |
| 741 | IVDGNHRLTL  | 1      | 3          | Q9H254;Q01082;O15020     |           | 1,019E7 | 0,011   | 0,1104 | 27       | 0,4652518   | 2   | 1137,63738 | -0,14    | 67,33    |
| 742 | VPRIDPYGF   | 1      | 1          | Q5TC63                   |           | 3,134E6 | 0,011   | 0,1119 | 26       | 0,806383827 | 2   | 1063,55864 | 1,40     | 110,74   |
| 743 | NPWDNKAVY   | 4      | 1          | Q86TM6                   |           | 3,657E5 | 0,011   | 0,1096 | 25       | 1,183430493 | 2   | 1106,52629 | -0,25    | 88,23    |

| #   | Sequence    | # PSMs | # Proteins | Protein Group Accessions    | Mod. (ox) | Area    | q-Value | PEP    | IonScore | Exp. Value  | Ch. | MH+ [Da]   | ΔM [ppm] | RT [min] |
|-----|-------------|--------|------------|-----------------------------|-----------|---------|---------|--------|----------|-------------|-----|------------|----------|----------|
| 744 | KmAEVIGSKL  | 1      | 1          | Q9NU22                      | M2        | 2,207E6 | 0,011   | 0,1124 | 24       | 1,166840672 | 2   | 1091,61394 | 0,88     | 50,82    |
| 745 | ILRDGITAGK  | 1      | 3          | O00478;O00481;P78410        |           | 2,044E6 | 0,011   | 0,1094 | 21       | 2,186118611 | 2   | 1043,62444 | 3,46     | 48,56    |
| 746 | GNYEKVFY    | 3      | 1          | Q92624                      |           | 1,489E7 | 0,011   | 0,1101 | 20       | 3,379800607 | 2   | 1148,52800 | 1,84     | 92,32    |
| 747 | DPADPHKVY   | 1      | 1          | Q92985                      |           | 3,910E6 | 0,011   | 0,1099 | 17       | 6,984602561 | 2   | 1041,50066 | 0,61     | 46,46    |
| 748 | RTYYSPVYR   | 1      | 1          | Q99569                      |           | 2,372E6 | 0,011   | 0,1116 | 16       | 13,20384811 | 2   | 1204,61516 | 3,50     | 56,79    |
| 749 | RPYAPINANAI | 1      | 1          | O94776                      |           | 1,333E7 | 0,012   | 0,1126 | 52       | 0,001676763 | 2   | 1199,65679 | 3,00     | 84,43    |
| 750 | APVGGHILSY  | 4      | 1          | O00159                      |           | 2,271E5 | 0,012   | 0,1187 | 46       | 0,009365775 | 2   | 1013,54082 | -0,66    | 85,36    |
| 751 | RAAQSLNKK   | 1      | 2          | Q9UMR2;Q9NUU7               |           | 9,742E6 | 0,012   | 0,1144 | 41       | 0,017972408 | 2   | 1000,59422 | 4,37     | 36,04    |
| 752 | RTNKEIIAIK  | 1      | 1          | P27216                      |           | 1,938E6 | 0,012   | 0,113  | 41       | 0,009276191 | 2   | 1185,72978 | -1,40    | 41,69    |
| 753 | LPIGDVATQY  | 2      | 1          | Q99832                      |           | 7,773E5 | 0,012   | 0,1135 | 41       | 0,047140997 | 2   | 1076,56194 | -0,33    | 123,95   |
| 754 | GLATQAFHY   | 1      | 1          | O15027                      |           | 9,261E6 | 0,012   | 0,1185 | 35       | 0,119625837 | 2   | 1007,49870 | 4,14     | 88,06    |
| 755 | KSTDVAKTF   | 1      | 1          | P13796                      |           | 1,525E7 | 0,012   | 0,1172 | 34       | 0,110720383 | 2   | 996,53789  | 1,81     | 41,19    |
| 756 | RLFHPLYR    | 1      | 1          | Q8IXL6                      |           | 2,552E7 | 0,012   | 0,1184 | 34       | 0,131615524 | 3   | 1230,67517 | 0,76     | 66,69    |
| 757 | QVGLAIRSK   | 1      | 4          | P52895;Q04828;P42330;P17516 |           | 9,379E6 | 0,012   | 0,1176 | 33       | 0,072025762 | 2   | 971,60155  | 1,91     | 47,48    |
| 758 | ATNASVFKY   | 1      | 3          | Q7Z6B7;O75044;PODJJO        |           | 1,005E7 | 0,012   | 0,1143 | 33       | 0,208709847 | 2   | 1000,51262 | 2,77     | 72,79    |
| 759 | IPASVEHGRVY | 1      | 1          | Q9H2F3                      |           | 3,028E6 | 0,012   | 0,1135 | 32       | 0,187440712 | 2   | 1227,65044 | 1,91     | 57,93    |
| 760 | SPVSKGILQY  | 1      | 1          | P23921                      |           | 1,117E7 | 0,012   | 0,1154 | 32       | 0,196299845 | 2   | 1091,61235 | 2,55     | 85,37    |
| 761 | LPVDIRQYL   | 1      | 1          | P52630                      |           | 2,208E6 | 0,012   | 0,1165 | 31       | 0,173658065 | 2   | 1116,64519 | 3,56     | 135,75   |

| #   | Sequence   | # PSMs | # Proteins | Protein Group Accessions                                       | Mod. (ox) | Area    | q-Value | PEP    | IonScore | Exp. Value  | Ch. | MH+ [Da]   | ΔM [ppm] | RT [min] |
|-----|------------|--------|------------|----------------------------------------------------------------|-----------|---------|---------|--------|----------|-------------|-----|------------|----------|----------|
| 762 | MPAETIKEL  | 6      | 1          | Q9H694                                                         |           | 2,931E7 | 0,012   | 0,1161 | 31       | 0,319361457 | 2   | 1031,54350 | -0,69    | 84,18    |
| 763 | KQIEHTLNEK | 1      | 2          | P22694;P17612                                                  |           | 7,717E5 | 0,012   | 0,115  | 31       | 0,325956478 | 2   | 1239,67485 | 4,54     | 26,80    |
| 764 | IPTRVVTNY  | 7      | 1          | P21980                                                         |           | 7,505E7 | 0,012   | 0,116  | 28       | 0,488184358 | 2   | 1062,59368 | -0,54    | 72,69    |
| 765 | VPVGEKTTY  | 1      | 1          | P08582                                                         |           | 3,267E6 | 0,012   | 0,1143 | 28       | 0,632111518 | 2   | 993,52464  | -0,53    | 50,32    |
| 766 | RPAQLHIGF  | 1      | 1          | P22314                                                         |           | 6,971E7 | 0,012   | 0,1139 | 26       | 0,506321695 | 2   | 1038,58745 | 2,96     | 79,06    |
| 767 | NPVENIIRF  | 1      | 1          | Q8WUJ0                                                         |           | 2,502E6 | 0,012   | 0,114  | 25       | 0,965009429 | 2   | 1101,60857 | 3,08     | 118,24   |
| 768 | SVVYKVLK   | 3      | 9          | Q99879;O60814;P57053;Q93079;Q5QNW6;P62807;P58876;Q99880;Q99877 |           | 4,973E7 | 0,012   | 0,114  | 23       | 0,915714001 | 2   | 1098,65703 | 1,14     | 71,67    |
| 769 | LPLTHFELY  | 1      | 1          | P43686                                                         |           | 1,287E7 | 0,012   | 0,1186 | 22       | 2,99178564  | 2   | 1132,60808 | 3,82     | 126,67   |
| 770 | mTHNLLNY   | 3      | 2          | Q92769;Q13547                                                  | M1        | 2,219E7 | 0,012   | 0,119  | 21       | 3,880029078 | 2   | 1134,56291 | 1,48     | 97,97    |
| 771 | RILNHVLQH  | 1      | 1          | P21964                                                         |           | 1,105E6 | 0,012   | 0,1148 | 18       | 4,046621001 | 2   | 1129,66191 | 2,65     | 51,00    |
| 772 | KTIHLTKV   | 1      | 1          | O15205                                                         |           | 2,700E6 | 0,012   | 0,1172 | 18       | 0,510605277 | 2   | 1052,68242 | -0,25    | 64,24    |
| 773 | RIFQEPTPK  | 1      | 1          | P31350                                                         |           | 2,012E6 | 0,012   | 0,1186 | 15       | 12,66514847 | 2   | 1244,66643 | 2,42     | 58,41    |
| 774 | VIGTVTSGK  | 2      | 1          | P01008                                                         |           | 6,886E5 | 0,013   | 0,1193 | 44       | 0,010259035 | 2   | 861,50389  | -0,18    | 40,49    |
| 775 | KLLPSVVLK  | 2      | 1          | Q99075                                                         |           | 2,007E5 | 0,013   | 0,1216 | 44       | 0,000680657 | 2   | 996,68114  | -0,49    | 81,40    |
| 776 | IVAGSLITK  | 2      | 1          | O75400                                                         |           | 3,893E5 | 0,013   | 0,1241 | 43       | 0,005249936 | 2   | 901,57121  | -0,58    | 73,61    |
| 777 | SPQKVTLYL  | 1      | 1          | P05107                                                         |           | 3,161E5 | 0,013   | 0,1254 | 43       | 0,012811767 | 2   | 1048,60393 | 0,17     | 92,74    |
| 778 | TPLDEKSLAL | 1      | 2          | Q15014;Q9UBU8                                                  |           | 6,864E6 | 0,013   | 0,1214 | 42       | 0,016219349 | 2   | 1086,60710 | 2,70     | 101,09   |
| 779 | IAINLLPLL  | 1      | 1          | Q9BXW9                                                         |           | 2,092E7 | 0,013   | 0,1224 | 41       | 0,000822391 | 2   | 979,65776  | 2,74     | 130,83   |

| #   | Sequence   | # PSMs | # Proteins | Protein Group Accessions | Mod. (ox) | Area    | q-Value | PEP    | IonScore | Exp. Value  | Ch. | MH+ [Da]   | ΔM [ppm] | RT [min] |
|-----|------------|--------|------------|--------------------------|-----------|---------|---------|--------|----------|-------------|-----|------------|----------|----------|
| 780 | IPARFAGVLL | 4      | 1          | P04275                   |           | 4,939E5 | 0,013   | 0,1229 | 40       | 0,012395004 | 2   | 1056,65618 | -0,30    | 122,53   |
| 781 | APWDRVVDL  | 1      | 1          | O00116                   |           | 2,504E7 | 0,013   | 0,12   | 37       | 0,063227011 | 2   | 1070,56536 | 2,22     | 126,52   |
| 782 | SPLNTGKAL  | 3      | 1          | P12111                   |           | 1,561E5 | 0,013   | 0,1206 | 36       | 0,102797113 | 2   | 900,51457  | -0,42    | 56,56    |
| 783 | RSLGSSPVK  | 1      | 1          | Q9HCM1                   |           | 1,605E7 | 0,013   | 0,1211 | 36       | 0,111273502 | 2   | 930,53728  | 0,57     | 30,44    |
| 784 | FVQmmTAK   | 2      | 1          | P62158                   | M4;<br>M5 | 1,594E5 | 0,013   | 0,1233 | 35       | 0,077000161 | 2   | 987,46330  | -0,56    | 33,48    |
| 785 | SPDKIPWSAL | 2      | 1          | Q14204                   |           | 2,096E5 | 0,013   | 0,1256 | 35       | 0,104617416 | 2   | 1113,59343 | -0,46    | 120,26   |
| 786 | APAAWLRSA  | 1      | 1          | P24347                   |           | 6,086E6 | 0,013   | 0,1254 | 35       | 0,063744968 | 2   | 942,51756  | 2,05     | 79,48    |
| 787 | LPEPVVARF  | 1      | 1          | Q8IUX7                   |           | 7,106E6 | 0,013   | 0,1216 | 35       | 0,033806102 | 2   | 1027,59551 | 1,90     | 103,23   |
| 788 | LPASVHPQL  | 1      | 1          | Q9H0K1                   |           | 1,152E7 | 0,013   | 0,1255 | 35       | 0,089943539 | 2   | 961,54766  | 1,12     | 78,02    |
| 789 | QLVSNLIF   | 1      | 1          | O95622                   |           | 6,339E5 | 0,013   | 0,1251 | 35       | 0,074407492 | 2   | 1032,60832 | -0,51    | 132,56   |
| 790 | LPRTDYSF   | 1      | 1          | P20036                   |           | 2,530E5 | 0,013   | 0,1208 | 35       | 0,136416999 | 2   | 998,49364  | -0,56    | 88,60    |
| 791 | RPLTSPEL   | 1      | 1          | P46379                   |           | 1,195E7 | 0,013   | 0,1221 | 34       | 0,111784126 | 2   | 999,54607  | -0,91    | 68,51    |
| 792 | RPLVVKTSL  | 1      | 1          | P78345                   |           | 7,787E6 | 0,013   | 0,1236 | 34       | 0,03142059  | 2   | 1012,65245 | 1,05     | 62,65    |
| 793 | KPPVGTWLGL | 1      | 1          | O75995                   |           | 4,460E6 | 0,013   | 0,1194 | 33       | 0,062275204 | 2   | 1067,62798 | 2,93     | 120,69   |
| 794 | RIGKVGKQK  | 3      | 1          | P51665                   |           | 3,153E5 | 0,013   | 0,1213 | 32       | 0,104637518 | 2   | 999,60533  | -0,51    | 21,65    |
| 795 | GVSGIFmKY  | 4      | 1          | Q96RQ1                   | M7        | 1,958E5 | 0,013   | 0,1198 | 32       | 0,282102056 | 2   | 1017,50688 | -0,53    | 88,51    |
| 796 | PILYNDILY  | 4      | 1          | Q5VW36                   |           | 2,049E6 | 0,013   | 0,125  | 31       | 0,233135337 | 2   | 1123,60332 | -0,08    | 155,08   |
| 797 | GTLSGWILSK | 4      | 1          | P27824                   |           | 2,046E7 | 0,013   | 0,1246 | 31       | 0,293579913 | 2   | 1061,59905 | 0,02     | 114,66   |

| #   | Sequence   | # PSMs | # Proteins | Protein Group Accessions                                                            | Mod. (ox) | Area    | q-Value | PEP    | IonScore | Exp. Value  | Ch. | MH+ [Da]   | ΔM [ppm] | RT [min] |
|-----|------------|--------|------------|-------------------------------------------------------------------------------------|-----------|---------|---------|--------|----------|-------------|-----|------------|----------|----------|
| 798 | KTGEVLDTK  | 1      | 1          | Q92520                                                                              |           | 5,535E6 | 0,013   | 0,1241 | 30       | 0,291351584 | 2   | 990,54711  | 0,46     | 30,67    |
| 799 | SPISQKIY   | 1      | 1          | P08603                                                                              |           | 1,278E7 | 0,013   | 0,1196 | 30       | 0,244828637 | 2   | 1048,60539 | 1,57     | 84,32    |
| 800 | RPPPFSEKF  | 1      | 1          | Q8TDJ6                                                                              |           | 5,831E6 | 0,013   | 0,1232 | 29       | 0,476012446 | 2   | 1104,58354 | -0,15    | 67,92    |
| 801 | EAIRISPTF  | 1      | 1          | O15294                                                                              |           | 2,654E7 | 0,013   | 0,1226 | 28       | 0,655014595 | 2   | 1033,57024 | 2,43     | 102,97   |
| 802 | QLSLIPKFL  | 4      | 1          | Q9ULK4                                                                              |           | 5,980E7 | 0,013   | 0,1246 | 27       | 0,184832678 | 2   | 1058,66069 | -0,19    | 144,73   |
| 803 | ALIRQLKQ   | 1      | 1          | Q7Z6K1                                                                              |           | 4,191E7 | 0,013   | 0,1251 | 26       | 0,137079878 | 2   | 969,62297  | 2,63     | 62,75    |
| 804 | AVFPKPFVEK | 1      | 1          | Q6PFW1                                                                              |           | 2,222E7 | 0,013   | 0,1208 | 26       | 0,585814647 | 2   | 1161,66753 | 0,69     | 81,29    |
| 805 | TPIEGmLSH  | 1      | 1          | Q9UQ80                                                                              | M6        | 2,797E6 | 0,013   | 0,1205 | 26       | 0,769279856 | 2   | 1000,48003 | 3,17     | 60,00    |
| 806 | KFDDGAVFL  | 1      | 1          | O14974                                                                              |           | 3,524E5 | 0,013   | 0,1245 | 26       | 1,045809726 | 2   | 1011,51415 | -0,48    | 120,76   |
| 807 | FAYDGKDYI  | 4      | 11         | P30462;P18463;Q95365;P30475;Q29836;Q31612;P30504;Q95604;Q29865;Q9TNN7;P30505;P13747 |           | 1,446E7 | 0,013   | 0,1222 | 26       | 0,828665044 | 2   | 1091,50664 | 2,02     | 101,96   |
| 808 | KLYGKPIRV  | 1      | 1          | Q15427                                                                              |           | 3,287E6 | 0,013   | 0,1248 | 26       | 0,087878647 | 2   | 1073,68303 | 0,01     | 46,11    |
| 809 | NLLPYSLRY  | 1      | 1          | Q709C8                                                                              |           | 2,345E5 | 0,013   | 0,1212 | 25       | 0,899530345 | 2   | 1138,62541 | -0,11    | 119,97   |
| 810 | SWNNHSYLY  | 4      | 1          | P38435                                                                              |           | 4,782E5 | 0,013   | 0,1256 | 24       | 0,631909198 | 2   | 1183,51641 | -0,25    | 86,88    |
| 811 | YPVKYTQTF  | 1      | 1          | Q96FX8                                                                              |           | 4,793E6 | 0,013   | 0,1243 | 23       | 2,010506189 | 2   | 1146,58660 | 3,13     | 83,52    |
| 812 | PSRILLWK   | 4      | 1          | Q9BRK3                                                                              |           | 7,920E7 | 0,013   | 0,1217 | 23       | 0,486716253 | 2   | 1012,62950 | -0,75    | 104,37   |
| 813 | FPLLIMGITY | 1      | 1          | P29371                                                                              |           | 3,486E5 | 0,013   | 0,1206 | 23       | 1,366597757 | 2   | 1167,65203 | 3,21     | 120,25   |
| 814 | LLHDRSFSY  | 1      | 1          | Q9BSJ2                                                                              |           | 2,088E7 | 0,013   | 0,1244 | 22       | 1,958580677 | 2   | 1137,57085 | 1,83     | 70,61    |



| #   | Sequence   | # PSMs | # Proteins | Protein Group Accessions                                                                                 | Mod. (ox) | Area    | q-Value | PEP    | IonScore | Exp. Value  | Ch. | MH+ [Da]   | ΔM [ppm] | RT [min] |
|-----|------------|--------|------------|----------------------------------------------------------------------------------------------------------|-----------|---------|---------|--------|----------|-------------|-----|------------|----------|----------|
| 815 | RPKKPGQSF  | 1      | 1          | O15042                                                                                                   |           | 6,400E6 | 0,013   | 0,1251 | 22       | 0,967371085 | 2   | 1044,59892 | 3,81     | 24,94    |
| 816 | KLNNRQLNY  | 2      | 1          | Q12792                                                                                                   |           | 1,107E8 | 0,013   | 0,1236 | 21       | 2,320452454 | 2   | 1162,63262 | -0,13    | 40,50    |
| 817 | SVDHVRVTK  | 1      | 1          | P20929                                                                                                   |           | 9,089E6 | 0,013   | 0,1242 | 21       | 1,654130449 | 2   | 1040,58940 | 4,46     | 26,71    |
| 818 | RVHAYIISY  | 1      | 1          | Q9NZN4                                                                                                   |           | 0,000E0 | 0,013   | 0,1237 | 20       | 1,988133386 | 2   | 1121,61284 | 2,34     | 79,83    |
| 819 | DAFKSGIVQY | 1      | 1          | Q9NZ08                                                                                                   |           | 1,166E7 | 0,013   | 0,1207 | 20       | 3,669067241 | 2   | 1127,57561 | 2,14     | 98,19    |
| 820 | KLCGYVIFR  | 1      | 1          | Q14739                                                                                                   |           | 5,775E5 | 0,013   | 0,1217 | 20       | 2,540274625 | 2   | 1098,61455 | 1,51     | 112,05   |
| 821 | SLYHKLREK  | 1      | 1          | Q15392                                                                                                   |           | 1,210E7 | 0,013   | 0,1245 | 20       | 2,032180042 | 2   | 1173,67607 | 1,85     | 29,83    |
| 822 | APWQERSTm  | 1      | 1          | P57764                                                                                                   | M9        | 1,150E6 | 0,013   | 0,1225 | 19       | 4,14366889  | 2   | 1121,50932 | 4,32     | 52,58    |
| 823 | KFTNFNLFY  | 2      | 1          | P28039                                                                                                   |           | 3,083E6 | 0,013   | 0,1244 | 16       | 12,51296959 | 2   | 1193,60393 | 4,13     | 130,29   |
| 824 | QTYVGITEK  | 1      | 1          | O75643                                                                                                   |           | 1,735E8 | 0,013   | 0,1222 | 12       | 16,59645498 | 2   | 1038,54973 | 2,98     | 60,83    |
| 825 | TWNPLKLHY  | 1      | 1          | Q9H4A6                                                                                                   |           | 1,717E7 | 0,013   | 0,1225 | 12       | 20,42079629 | 2   | 1171,62895 | 2,62     | 102,83   |
| 826 | IGNGVVIHL  | 1      | 2          | Q8N142;P30520                                                                                            |           | 5,506E6 | 0,014   | 0,1294 | 49       | 0,001467941 | 2   | 921,55351  | 2,00     | 100,33   |
| 827 | RLLSPPLRPR | 1      | 1          | O75882                                                                                                   |           | 1,311E8 | 0,014   | 0,1301 | 40       | 0,002028535 | 3   | 1204,76749 | 3,10     | 59,89    |
| 828 | SIRQAGGIGK | 1      | 5          | Q9NQA3;C4AMC7;A8K0Z3;Q6VEQ5;A8MWX3                                                                       |           | 1,163E7 | 0,014   | 0,1293 | 38       | 0,038607149 | 2   | 986,57640  | 2,22     | 30,90    |
| 829 | SVAEHPLSR  | 1      | 1          | O60287                                                                                                   |           | 3,678E6 | 0,014   | 0,1263 | 36       | 0,092185751 | 2   | 995,52367  | -3,26    | 34,53    |
| 830 | AQNEPLTQK  | 1      | 1          | O95104                                                                                                   |           | 2,676E6 | 0,014   | 0,1269 | 33       | 0,153229878 | 2   | 1028,53667 | -0,46    | 32,61    |
| 831 | VMAPRTLIL  | 2      | 8          | P04222;P30504;Q29963;P30508;P30510;Q29960;Q9TNN7;P30505;P30443;P04439;P13746;P16188;P10314;P30455;P30459 |           | 2,771E5 | 0,014   | 0,1304 | 33       | 0,055294476 | 2   | 1013,61705 | -0,60    | 109,42   |

| #   | Sequence    | # PSMs | # Proteins | Protein Group Accessions | Mod. (ox) | Area    | q-Value | PEP    | IonScore | Exp. Value  | Ch. | MH+ [Da]   | ΔM [ppm] | RT [min] |
|-----|-------------|--------|------------|--------------------------|-----------|---------|---------|--------|----------|-------------|-----|------------|----------|----------|
| 832 | SPFSYKNVL   | 1      | 1          | P05556                   |           | 1,269E7 | 0,014   | 0,1282 | 32       | 0,208962298 | 2   | 1054,55962 | 2,67     | 99,86    |
| 833 | HPIHQGITEL  | 1      | 1          | Q9H410                   |           | 5,925E6 | 0,014   | 0,1269 | 29       | 0,416650645 | 2   | 1144,61431 | 2,91     | 60,05    |
| 834 | GTYGFWYPK   | 1      | 1          | Q8N6M3                   |           | 2,441E6 | 0,014   | 0,1258 | 29       | 0,453454542 | 2   | 1118,53288 | 2,06     | 109,79   |
| 835 | KLYLPTGPR   | 1      | 1          | P38936                   |           | 9,951E6 | 0,014   | 0,1275 | 29       | 0,279398397 | 2   | 1044,62114 | 1,01     | 64,28    |
| 836 | KLPNTVLGK   | 1      | 1          | Q9H4M9                   |           | 6,525E6 | 0,014   | 0,1289 | 28       | 0,154911758 | 2   | 969,61266  | 3,57     | 53,84    |
| 837 | KVISSNTSLK  | 1      | 1          | Q8IY18                   |           | 3,424E6 | 0,014   | 0,1262 | 28       | 0,300903488 | 2   | 1076,63323 | 2,03     | 34,92    |
| 838 | KVETFSGVYK  | 2      | 1          | P62081                   |           | 1,216E5 | 0,014   | 0,1287 | 27       | 0,80052366  | 2   | 1157,61992 | -0,19    | 52,28    |
| 839 | FPIDKPPSF   | 1      | 1          | P51805                   |           | 8,475E6 | 0,014   | 0,1257 | 27       | 1,00771713  | 2   | 1047,55327 | 2,16     | 109,63   |
| 840 | YTRPTPVQK   | 3      | 2          | O00571;O15523            |           | 8,010E7 | 0,014   | 0,1322 | 27       | 0,737385055 | 2   | 1089,60515 | 0,00     | 33,14    |
| 841 | ADKQLSFEEF  | 1      | 1          | P06702                   |           | 2,183E6 | 0,014   | 0,1287 | 26       | 0,817224265 | 2   | 1213,57781 | 3,47     | 106,62   |
| 842 | LVSESSDVLPK | 1      | 1          | P05787                   |           | 4,021E6 | 0,014   | 0,1301 | 25       | 1,305227689 | 2   | 1173,63811 | 1,63     | 76,43    |
| 843 | ALSSYVVKK   | 1      | 1          | O95714                   |           | 4,588E6 | 0,014   | 0,1276 | 24       | 0,420500375 | 2   | 994,59276  | -0,43    | 48,91    |
| 844 | APWKPTWPA   | 4      | 1          | O95084                   |           | 8,904E7 | 0,014   | 0,132  | 24       | 1,106392022 | 2   | 1053,55327 | 1,51     | 102,81   |
| 845 | RLEEKSRVK   | 1      | 1          | P10586                   |           | 3,692E6 | 0,014   | 0,1306 | 23       | 0,757321974 | 2   | 1144,68047 | 0,63     | 19,77    |
| 846 | YVIQKFFEF   | 1      | 2          | Q8TB72;Q14671            |           | 3,577E6 | 0,014   | 0,1288 | 22       | 2,820315215 | 2   | 1220,63994 | 4,00     | 142,07   |
| 847 | NPYPGDVTKF  | 1      | 1          | Q5T6F2                   |           | 2,154E6 | 0,014   | 0,1278 | 22       | 3,01512749  | 2   | 1137,56243 | 4,29     | 88,34    |
| 848 | KPINVRVTTm  | 1      | 2          | P35241;P15311            | M10       | 8,361E6 | 0,014   | 0,1298 | 19       | 3,611981318 | 2   | 1174,65984 | -1,26    | 48,76    |
| 849 | FLGISTFSQY  | 1      | 1          | P07327                   |           | 2,766E5 | 0,014   | 0,1283 | 18       | 6,361290485 | 2   | 1162,57756 | -0,32    | 112,14   |

| #   | Sequence       | # PSMs | # Proteins | Protein Group Accessions                                                                          | Mod. (ox) | Area    | q-Value | PEP    | IonScore | Exp. Value  | Ch. | MH+ [Da]   | ΔM [ppm] | RT [min] |
|-----|----------------|--------|------------|---------------------------------------------------------------------------------------------------|-----------|---------|---------|--------|----------|-------------|-----|------------|----------|----------|
| 850 | KPYAFDRVF      | 1      | 1          | P33176                                                                                            |           | 4,852E6 | 0,014   | 0,1265 | 17       | 6,518041425 | 2   | 1142,60124 | 1,66     | 90,53    |
| 851 | KmLRDTLYY      | 1      | 1          | P42356                                                                                            | M2        | 2,257E6 | 0,014   | 0,129  | 16       | 12,4910163  | 2   | 1218,61858 | -0,15    | 68,59    |
| 852 | YPFVRGELEY     | 1      | 1          | O15050                                                                                            |           | 3,879E6 | 0,014   | 0,1262 | 14       | 17,26994065 | 2   | 1272,63066 | 3,70     | 117,19   |
| 853 | YFRDQKDG Y     | 1      | 2          | Q99613;B5ME19                                                                                     |           | 1,933E6 | 0,014   | 0,1272 | 14       | 12,57725703 | 2   | 1191,54643 | 2,93     | 47,24    |
| 854 | IMRIALG L L    | 1      | 1          | P04278                                                                                            |           | 5,874E5 | 0,015   | 0,1343 | 43       | 0,006029019 | 2   | 1056,65581 | -3,84    | 122,36   |
| 855 | IQTAVR L L L   | 1      | 14         | Q99879;P06899;O60814;P57053;Q93079;P23527;Q5QNW6;P62807;Q16778;P58876;Q99880;Q99877;P33778;Q96A08 |           | 1,675E5 | 0,015   | 0,1374 | 42       | 0,003688546 | 2   | 1026,66631 | -0,71    | 117,41   |
| 856 | KPLGIK T A L   | 1      | 1          | Q63HN8                                                                                            |           | 5,849E7 | 0,015   | 0,133  | 40       | 0,00545726  | 2   | 940,62029  | 1,33     | 62,25    |
| 857 | LPSQVSRV V     | 1      | 1          | P35606                                                                                            |           | 1,420E6 | 0,015   | 0,1341 | 39       | 0,025469153 | 2   | 984,58763  | 3,99     | 74,58    |
| 858 | RPVPFASE m     | 1      | 1          | Q16828                                                                                            | M9        | 4,726E6 | 0,015   | 0,1372 | 39       | 0,051044613 | 2   | 1049,50957 | 1,01     | 66,48    |
| 859 | LPPPPH V P L   | 1      | 1          | Q9BQ83                                                                                            |           | 2,776E7 | 0,015   | 0,1357 | 39       | 0,009917964 | 2   | 966,57976  | 2,69     | 98,98    |
| 860 | GAYGEPRV K     | 1      | 1          | Q15392                                                                                            |           | 8,516E4 | 0,015   | 0,1341 | 38       | 0,058771438 | 2   | 976,52056  | -0,56    | 34,89    |
| 861 | YPTISL H A L   | 1      | 1          | P54105                                                                                            |           | 8,843E6 | 0,015   | 0,1326 | 37       | 0,037237637 | 2   | 1014,56346 | 1,56     | 112,20   |
| 862 | PKNPLFPQ N L   | 3      | 1          | P59047                                                                                            |           | 3,486E5 | 0,015   | 0,1328 | 37       | 0,048702647 | 2   | 1167,65227 | 0,13     | 120,32   |
| 863 | KVNTGL m T S K | 1      | 1          | Q8N3C7                                                                                            | M7        | 3,481E6 | 0,015   | 0,1351 | 36       | 0,10522345  | 2   | 1094,58916 | 1,54     | 28,63    |
| 864 | ALASVVIH K     | 1      | 1          | Q6PIW4                                                                                            |           | 2,062E6 | 0,015   | 0,1374 | 33       | 0,03254362  | 2   | 937,58379  | 0,87     | 58,06    |
| 865 | TPIKDG I L Y   | 1      | 1          | Q7L591                                                                                            |           | 3,533E7 | 0,015   | 0,133  | 33       | 0,104656809 | 2   | 1019,58000 | 2,74     | 92,08    |
| 866 | VFDIHVID F     | 3      | 1          | O95302                                                                                            |           | 1,284E5 | 0,015   | 0,1345 | 32       | 0,264625086 | 2   | 1104,57219 | -0,25    | 158,29   |

| #   | Sequence    | # PSMs | # Proteins | Protein Group Accessions | Mod. (ox) | Area    | q-Value | PEP    | IonScore | Exp. Value  | Ch. | MH+ [Da]   | ΔM [ppm] | RT [min] |
|-----|-------------|--------|------------|--------------------------|-----------|---------|---------|--------|----------|-------------|-----|------------|----------|----------|
| 867 | NPHEVQPAY   | 1      | 1          | Q9GZT9                   |           | 1,895E7 | 0,015   | 0,1368 | 29       | 0,313526888 | 2   | 1054,49639 | 1,07     | 49,55    |
| 868 | LPILLNERL   | 1      | 1          | Q8NF50                   |           | 1,397E6 | 0,015   | 0,1361 | 29       | 0,06693238  | 2   | 1080,67986 | 2,08     | 122,14   |
| 869 | KAIEKNVLF   | 1      | 1          | P10644                   |           | 1,179E7 | 0,015   | 0,1346 | 28       | 0,183090984 | 2   | 1061,63701 | 1,51     | 69,57    |
| 870 | RAAPFSLEY   | 1      | 1          | Q15181                   |           | 3,999E7 | 0,015   | 0,1337 | 28       | 0,556703401 | 2   | 1053,53960 | 3,03     | 100,08   |
| 871 | ALIDYENSNK  | 1      | 1          | Q9Y5X3                   |           | 3,797E6 | 0,015   | 0,1353 | 26       | 1,028142013 | 2   | 1166,57158 | 2,36     | 71,21    |
| 872 | QLYSKFLK    | 1      | 1          | P04114                   |           | 4,043E6 | 0,015   | 0,134  | 24       | 0,336472582 | 2   | 1139,68559 | 2,85     | 88,64    |
| 873 | AILSKFLYY   | 1      | 1          | Q3B7T1                   |           | 1,630E6 | 0,015   | 0,1374 | 24       | 1,146710565 | 2   | 1117,63176 | 2,26     | 128,06   |
| 874 | HPARLTIEAY  | 1      | 1          | Q03001                   |           | 4,010E6 | 0,015   | 0,1363 | 23       | 1,198837242 | 2   | 1170,62981 | 2,72     | 69,48    |
| 875 | LPPFDETHERY | 1      | 1          | O43292                   |           | 4,749E7 | 0,015   | 0,1328 | 20       | 3,38468903  | 3   | 1403,66150 | 1,75     | 83,56    |
| 876 | SSIQHSSVPSI | 1      | 1          | Q9H4D0                   |           | 2,429E6 | 0,015   | 0,1357 | 20       | 3,256394794 | 2   | 1240,65703 | 3,06     | 106,73   |
| 877 | VLLEYHIAY   | 1      | 1          | P51114                   |           | 2,059E6 | 0,015   | 0,1372 | 20       | 3,748378267 | 2   | 1120,60613 | 2,13     | 115,47   |
| 878 | mLPLDLREL   | 1      | 1          | Q9NPC4                   | M1        | 9,976E6 | 0,015   | 0,1326 | 20       | 4,773040531 | 2   | 1115,61077 | -1,98    | 98,90    |
| 879 | YVYFTNELK   | 1      | 1          | P50591                   |           | 2,663E6 | 0,015   | 0,1359 | 18       | 6,495024692 | 2   | 1176,59636 | 2,37     | 97,06    |
| 880 | RIRDLAQLK   | 1      | 1          | P42226                   |           | 4,277E6 | 0,015   | 0,1333 | 17       | 1,778060173 | 2   | 1112,69341 | 3,14     | 54,93    |
| 881 | SLAEILLKK   | 1      | 2          | O95373;O15397            |           | 2,461E7 | 0,015   | 0,1348 | 16       | 1,182087709 | 2   | 1014,65807 | 2,22     | 94,62    |
| 882 | LPHLADLVSY  | 2      | 1          | P11473                   |           | 2,295E5 | 0,015   | 0,1353 | 16       | 8,003247889 | 2   | 1127,60893 | -0,56    | 132,86   |
| 883 | VLKVTKAAGTK | 1      | 1          | P62280                   |           | 1,782E6 | 0,015   | 0,1362 | 16       | 0,617552269 | 2   | 1115,71929 | 4,08     | 27,62    |
| 884 | YYDPKHFVIF  | 1      | 1          | Q9NUQ8                   |           | 2,871E6 | 0,015   | 0,136  | 16       | 11,23511102 | 2   | 1181,60149 | 2,11     | 92,47    |

| #   | Sequence    | # PSMs | # Proteins | Protein Group Accessions    | Mod. (ox) | Area    | q-Value | PEP    | IonScore | Exp. Value  | Ch. | MH+ [Da]   | $\Delta$ M [ppm] | RT [min] |
|-----|-------------|--------|------------|-----------------------------|-----------|---------|---------|--------|----------|-------------|-----|------------|------------------|----------|
| 885 | LPNSIASRF   | 1      | 1          | Q9ULT0                      |           | 5,311E6 | 0,015   | 0,1346 | 15       | 10,67495814 | 2   | 1004,55492 | 2,51             | 87,06    |
| 886 | RVAPSLKSQR  | 1      | 1          | P49257                      |           | 8,092E5 | 0,015   | 0,1356 | 13       | 7,258487198 | 2   | 1141,67876 | -1,15            | 28,47    |
| 887 | NPHFGSHRY   | 1      | 1          | Q08211                      |           | 3,288E6 | 0,015   | 0,1341 | 12       | 17,58503544 | 2   | 1114,51824 | 0,46             | 30,15    |
| 888 | RPAEPPFQAL  | 1      | 1          | A6NCS6                      |           | 7,484E6 | 0,016   | 0,1383 | 45       | 0,007540431 | 2   | 1125,60857 | 3,01             | 91,97    |
| 889 | RILGPGLNK   | 1      | 1          | P62906                      |           | 1,114E7 | 0,016   | 0,1375 | 38       | 0,007787472 | 2   | 967,60484  | 0,07             | 51,08    |
| 890 | FPVPKPIDY   | 1      | 1          | Q9BVS4                      |           | 8,244E6 | 0,016   | 0,1403 | 37       | 0,072778889 | 2   | 1075,58513 | 2,63             | 106,91   |
| 891 | VVGAVVFQK   | 1      | 1          | Q12907                      |           | 4,324E6 | 0,016   | 0,1383 | 31       | 0,081209271 | 2   | 946,57305  | 1,02             | 77,60    |
| 892 | VLYENPNLK   | 1      | 1          | Q14204                      |           | 1,120E7 | 0,016   | 0,1376 | 31       | 0,297956519 | 2   | 1089,59722 | 3,02             | 71,44    |
| 893 | LPAQDIKAL   | 1      | 1          | P00751                      |           | 1,796E6 | 0,016   | 0,138  | 30       | 0,131357875 | 2   | 968,57878  | 1,26             | 83,92    |
| 894 | AVAHALTEK   | 1      | 1          | P49368                      |           | 8,950E6 | 0,016   | 0,1401 | 30       | 0,249328709 | 2   | 939,52513  | -0,76            | 30,09    |
| 895 | SSVPGVRL    | 1      | 1          | P08670                      |           | 5,371E7 | 0,016   | 0,1383 | 30       | 0,227109557 | 2   | 927,56365  | 1,51             | 97,04    |
| 896 | KPVKPHSSF   | 1      | 1          | Q9Y520                      |           | 6,297E6 | 0,016   | 0,1404 | 29       | 0,181902655 | 2   | 1026,57756 | 4,32             | 25,92    |
| 897 | YASGRRTGIVm | 1      | 3          | P60709;P63261;Q562R1        | M11       | 4,942E6 | 0,016   | 0,138  | 29       | 0,419593514 | 2   | 1171,58135 | 3,17             | 54,97    |
| 898 | LPGTAPKLLIY | 1      | 4          | P01700;P01701;P01702;P06887 |           | 9,968E6 | 0,016   | 0,1379 | 28       | 0,171606315 | 2   | 1185,72783 | 3,04             | 117,42   |
| 899 | FYDDKVSAL   | 2      | 1          | Q68CZ2                      |           | 2,240E5 | 0,016   | 0,1401 | 27       | 0,738546346 | 2   | 1057,52043 | 0,32             | 95,07    |
| 900 | LPFGPFKEL   | 1      | 1          | Q7Z449                      |           | 4,230E6 | 0,016   | 0,1419 | 25       | 0,627440466 | 2   | 1047,58928 | 1,79             | 129,13   |
| 901 | APLDLSKIKL  | 1      | 1          | O75369                      |           | 4,135E6 | 0,016   | 0,1399 | 25       | 0,223649808 | 2   | 1097,69609 | 2,88             | 112,62   |
| 902 | LPHQPLATY   | 1      | 1          | Q16633                      |           | 4,381E7 | 0,016   | 0,1378 | 24       | 1,116805048 | 2   | 1039,55998 | 2,74             | 76,90    |

| #   | Sequence    | # PSMs | # Proteins | Protein Group Accessions | Mod. (ox) | Area    | q-Value | PEP    | IonScore | Exp. Value  | Ch. | MH+ [Da]   | ΔM [ppm] | RT [min] |
|-----|-------------|--------|------------|--------------------------|-----------|---------|---------|--------|----------|-------------|-----|------------|----------|----------|
| 903 | YFHHQDGARY  | 1      | 1          | Q92802                   |           | 2,660E7 | 0,016   | 0,1412 | 22       | 1,189385627 | 3   | 1385,60566 | 2,52     | 47,40    |
| 904 | SPQQVDFRSVL | 1      | 1          | Q15746                   |           | 2,369E6 | 0,016   | 0,1392 | 21       | 3,539476289 | 2   | 1275,67266 | 2,68     | 110,21   |
| 905 | KSLGHGLINK  | 1      | 1          | Q8NI36                   |           | 2,918E6 | 0,016   | 0,1423 | 21       | 0,864330678 | 2   | 1066,63725 | 0,43     | 34,50    |
| 906 | VPVPPLPEY   | 1      | 1          | P24539                   |           | 6,114E7 | 0,016   | 0,1412 | 20       | 2,738803344 | 2   | 1010,55864 | 2,86     | 128,71   |
| 907 | FPVVRDFLY   | 1      | 1          | P12111                   |           | 4,067E6 | 0,016   | 0,1401 | 18       | 4,184800631 | 2   | 1155,62432 | 3,95     | 133,59   |
| 908 | GLNKESFRY   | 1      | 1          | Q5VWQ0                   |           | 6,487E6 | 0,016   | 0,1415 | 18       | 5,073283434 | 2   | 1113,57219 | 3,07     | 59,26    |
| 909 | QPINLIFRY   | 3      | 1          | P62304                   |           | 1,529E7 | 0,016   | 0,1386 | 17       | 2,634876514 | 2   | 1163,66045 | 2,80     | 125,94   |
| 910 | KLREPNTLK   | 1      | 1          | Q92545                   |           | 6,949E6 | 0,016   | 0,1387 | 17       | 3,356240169 | 2   | 1245,73686 | 4,35     | 62,06    |
| 911 | VYNHFLLYY   | 1      | 1          | Q7KZ85                   |           | 9,711E4 | 0,016   | 0,1412 | 15       | 14,65000341 | 2   | 1231,61577 | 0,93     | 126,98   |
| 912 | RPWLEGRHTL  | 1      | 1          | Q9UI10                   |           | 6,881E6 | 0,016   | 0,1378 | 13       | 16,05576355 | 2   | 1264,69621 | 4,15     | 61,18    |
| 913 | HIYDTKLGTDK | 1      | 1          | Q99439                   |           | 6,942E5 | 0,016   | 0,138  | 12       | 29,03034742 | 2   | 1290,67241 | 2,73     | 51,24    |
| 914 | RPADSMNLVL  | 1      | 1          | Q9BTL4                   |           | 2,181E5 | 0,017   | 0,1447 | 44       | 0,014440355 | 2   | 1115,58769 | -0,11    | 111,86   |
| 915 | HASDRHIAL   | 1      | 1          | P29401                   |           | 2,086E7 | 0,017   | 0,1451 | 43       | 0,009164209 | 2   | 995,56517  | 1,88     | 71,11    |
| 916 | IPTKQTQTF   | 1      | 3          | P54652;P11142;P17066     |           | 1,325E8 | 0,017   | 0,1475 | 39       | 0,048306514 | 2   | 1063,58098 | 2,55     | 54,30    |
| 917 | KLISEEDLLRK | 1      | 1          | P01106                   |           | 1,204E7 | 0,017   | 0,149  | 38       | 0,032074547 | 3   | 1343,79544 | 4,53     | 74,76    |
| 918 | AVASFPKKQE  | 1      | 1          | P14406                   |           | 5,458E4 | 0,017   | 0,1462 | 33       | 0,186928138 | 2   | 1104,60442 | -0,38    | 38,44    |
| 919 | MPRVQTQQY   | 1      | 1          | O94979                   |           | 4,295E6 | 0,017   | 0,1479 | 33       | 0,233904301 | 2   | 1150,57280 | 4,70     | 60,37    |
| 920 | RVKLPSGSKK  | 1      | 1          | P62917                   |           | 2,420E5 | 0,017   | 0,145  | 33       | 0,034480945 | 2   | 1099,69426 | -0,36    | 24,08    |

| #   | Sequence    | # PSMs | # Proteins | Protein Group Accessions | Mod. (ox) | Area    | q-Value | PEP    | IonScore | Exp. Value  | Ch. | MH+ [Da]   | $\Delta$ M [ppm] | RT [min] |
|-----|-------------|--------|------------|--------------------------|-----------|---------|---------|--------|----------|-------------|-----|------------|------------------|----------|
| 921 | TmVGKTTY    | 1      | 1          | Q16850                   | M2        | 7,247E6 | 0,017   | 0,1443 | 28       | 0,428300524 | 2   | 1063,51421 | 1,23             | 69,81    |
| 922 | APLHSVGYTTL | 1      | 1          | Q96BD6                   |           | 4,801E6 | 0,017   | 0,1439 | 28       | 0,680894059 | 2   | 1158,61821 | 2,44             | 85,40    |
| 923 | PSLSHNLLVD  | 1      | 1          | Q9ULA0                   |           | 4,006E7 | 0,017   | 0,1428 | 27       | 0,829366401 | 2   | 1094,58623 | 1,95             | 92,88    |
| 924 | FFGDVVLRF   | 1      | 1          | Q9H6E4                   |           | 8,240E4 | 0,017   | 0,1427 | 25       | 0,82469269  | 2   | 1099,59245 | -1,00            | 158,23   |
| 925 | GIKNFFDVY   | 3      | 1          | P0DI81                   |           | 1,933E5 | 0,017   | 0,1453 | 24       | 1,71304503  | 2   | 1203,60527 | 0,65             | 127,58   |
| 926 | GLWHmKTYK   | 1      | 1          | Q9ULC4                   | M5        | 2,308E6 | 0,017   | 0,1486 | 22       | 2,535922955 | 2   | 1179,59844 | 0,40             | 42,10    |
| 927 | RLKGPLLK    | 1      | 1          | P01024                   |           | 7,746E6 | 0,017   | 0,1468 | 21       | 0,353524749 | 2   | 1185,74687 | 0,15             | 67,61    |
| 928 | LPYQGHNSF   | 1      | 1          | Q7Z4G4                   |           | 3,754E6 | 0,017   | 0,1446 | 21       | 3,013073129 | 2   | 1062,50261 | 2,14             | 70,80    |
| 929 | SINDKIIEI   | 1      | 2          | Q12772;P36956            |           | 1,898E5 | 0,017   | 0,147  | 20       | 2,914039269 | 2   | 1044,59307 | -0,51            | 110,69   |
| 930 | DVYNHFLLY   | 3      | 1          | Q7KZ85                   |           | 3,412E5 | 0,017   | 0,1427 | 20       | 3,343526231 | 2   | 1183,57817 | -0,07            | 145,92   |
| 931 | KPHSGFHVAF  | 1      | 1          | Q8IYU8                   |           | 1,906E7 | 0,017   | 0,1436 | 20       | 3,982727654 | 2   | 1126,58000 | 0,64             | 57,59    |
| 932 | PRAWKETNm   | 1      | 1          | O76024                   | M9        | 0,000E0 | 0,017   | 0,149  | 19       | 5,317554884 | 2   | 1148,55620 | 3,86             | 61,99    |
| 933 | EVQPLHPDK   | 1      | 1          | P48067                   |           | 3,051E8 | 0,017   | 0,1476 | 19       | 6,051813347 | 2   | 1062,56011 | 2,09             | 44,67    |
| 934 | GQYSGSPQLLK | 1      | 1          | Q96N67                   |           | 4,833E6 | 0,017   | 0,1448 | 18       | 7,816862351 | 2   | 1177,62334 | 1,81             | 69,53    |
| 935 | HLFDHVVNR   | 1      | 1          | Q9UM54                   |           | 1,190E6 | 0,017   | 0,144  | 17       | 7,698719642 | 2   | 1136,59587 | -0,10            | 64,73    |
| 936 | SFVDPGERLY  | 1      | 1          | P16333                   |           | 3,786E6 | 0,017   | 0,1461 | 17       | 8,549063166 | 2   | 1182,58086 | 1,56             | 104,12   |
| 937 | NPVDWKEY    | 1      | 1          | O00469                   |           | 8,283E6 | 0,017   | 0,1488 | 17       | 8,929738636 | 2   | 1178,58354 | -0,46            | 65,47    |
| 938 | LIYVAGGLTK  | 1      | 1          | Q6TFL4                   |           | 1,011E7 | 0,017   | 0,1431 | 13       | 4,527831994 | 2   | 1034,62749 | 2,89             | 91,14    |

| #   | Sequence     | # PSMs | # Proteins | Protein Group Accessions    | Mod. (ox) | Area    | q-Value | PEP    | IonScore | Exp. Value  | Ch. | MH+ [Da]   | ΔM [ppm] | RT [min] |
|-----|--------------|--------|------------|-----------------------------|-----------|---------|---------|--------|----------|-------------|-----|------------|----------|----------|
| 939 | RSVQEALRF    | 1      | 1          | P50053                      |           | 1,034E6 | 0,017   | 0,1485 | 12       | 17,87474954 | 2   | 1105,61601 | 4,24     | 74,34    |
| 940 | LTGPVMPVR    | 1      | 1          | P26373                      | M6        | 2,064E7 | 0,018   | 0,1495 | 46       | 0,007104761 | 2   | 985,55266  | 2,72     | 60,53    |
| 941 | SLFPKALQR    | 1      | 1          | O43306                      |           | 2,223E7 | 0,018   | 0,1519 | 37       | 0,021479479 | 2   | 1059,63335 | 2,22     | 77,85    |
| 942 | DAADIRFVY    | 1      | 1          | P01033                      |           | 2,510E7 | 0,018   | 0,1527 | 37       | 0,072958221 | 2   | 1069,53386 | 2,37     | 117,67   |
| 943 | YADVGGKQF    | 1      | 1          | P51571                      |           | 7,490E6 | 0,018   | 0,1522 | 35       | 0,107653028 | 2   | 984,47905  | 0,50     | 65,41    |
| 944 | LGSNERLEF    | 1      | 1          | Q08188                      |           | 1,980E5 | 0,018   | 0,1527 | 33       | 0,221716493 | 2   | 1064,53691 | -0,22    | 88,11    |
| 945 | AANKVVLQLK   | 1      | 1          | Q9NX08                      |           | 2,361E6 | 0,018   | 0,1499 | 32       | 0,043580994 | 2   | 1083,69048 | 1,81     | 58,35    |
| 946 | ILYPPPGTGK   | 1      | 1          | P62191                      |           | 1,128E5 | 0,018   | 0,1502 | 31       | 0,388234853 | 2   | 1002,56182 | -0,09    | 75,30    |
| 947 | KGNLEVLLF    | 2      | 4          | Q9H254;Q01082;P11277;O15020 |           | 6,339E5 | 0,018   | 0,15   | 31       | 0,177262417 | 2   | 1032,60832 | -0,52    | 132,43   |
| 948 | RPPSPSGTI    | 1      | 1          | Q9Y2G0                      |           | 3,636E7 | 0,018   | 0,1524 | 30       | 0,308428566 | 2   | 1008,54961 | 2,27     | 53,66    |
| 949 | KLPSEPLSR    | 1      | 1          | Q14714                      |           | 1,592E6 | 0,018   | 0,1523 | 29       | 0,369837432 | 2   | 1113,62590 | -0,36    | 49,50    |
| 950 | APIAKVGVL    | 1      | 1          | Q9UHB6                      |           | 6,324E7 | 0,018   | 0,1552 | 29       | 0,058216769 | 2   | 867,56713  | 0,98     | 84,55    |
| 951 | NAARDFVNY    | 1      | 1          | Q08211                      |           | 2,651E7 | 0,018   | 0,1529 | 28       | 0,399689483 | 2   | 1069,50945 | 3,06     | 76,32    |
| 952 | GVmDRGYSY    | 1      | 1          | P28074                      | M3        | 3,373E4 | 0,018   | 0,1523 | 28       | 0,335648271 | 2   | 1063,45122 | -0,13    | 55,95    |
| 953 | AVTARGDGYGTF | 1      | 1          | Q9NQ94                      |           | 6,870E6 | 0,018   | 0,1555 | 26       | 0,670449441 | 2   | 1214,58354 | 2,85     | 72,43    |
| 954 | VLNLKEPLY    | 4      | 1          | O00468                      |           | 2,394E5 | 0,018   | 0,1534 | 26       | 0,651837602 | 2   | 1088,63469 | -0,34    | 117,04   |
| 955 | AVYGmLNLTPK  | 1      | 1          | O43776                      | M5        | 3,850E6 | 0,018   | 0,1514 | 26       | 0,862429483 | 2   | 1222,65349 | 2,79     | 92,10    |
| 956 | LPQHPDVEM    | 1      | 1          | Q7Z7E8                      |           | 8,597E6 | 0,018   | 0,1551 | 25       | 1,258055503 | 2   | 1065,50603 | 2,46     | 77,83    |



| #   | Sequence         | # PSMs | # Proteins | Protein Group Accessions | Mod. (ox) | Area    | q-Value | PEP    | IonScore | Exp. Value  | Ch. | MH+ [Da]   | ΔM [ppm] | RT [min] |
|-----|------------------|--------|------------|--------------------------|-----------|---------|---------|--------|----------|-------------|-----|------------|----------|----------|
| 957 | AVQRTLLEK        | 1      | 1          | P14209                   |           | 2,364E6 | 0,018   | 0,1525 | 25       | 0,691075657 | 2   | 1057,63664 | 0,16     | 43,72    |
| 958 | ILDQKINEV        | 1      | 1          | P11926                   |           | 4,684E5 | 0,018   | 0,1503 | 23       | 1,528408644 | 2   | 1071,60430 | -0,19    | 81,89    |
| 959 | KTAEDAKDFF       | 1      | 1          | Q99471                   |           | 4,584E6 | 0,018   | 0,1518 | 23       | 1,641597736 | 2   | 1171,56670 | 3,12     | 72,73    |
| 960 | LPPENILSAY       | 2      | 1          | P02743                   |           | 1,781E7 | 0,018   | 0,154  | 23       | 2,031871993 | 2   | 1116,59770 | 3,68     | 133,06   |
| 961 | TPAEVSHRF        | 1      | 1          | Q3T8J9                   |           | 2,262E6 | 0,018   | 0,1524 | 22       | 1,421496058 | 2   | 1043,52861 | 1,63     | 44,86    |
| 962 | LLDIQSSGRAK      | 1      | 2          | Q99613;B5ME19            |           | 2,766E7 | 0,018   | 0,1547 | 22       | 2,204904491 | 2   | 1187,67986 | 4,66     | 55,81    |
| 963 | AVREEVEVLK       | 1      | 3          | O75157;Q15714;Q9Y3Q8     |           | 5,063E6 | 0,018   | 0,152  | 22       | 1,977716177 | 2   | 1171,67156 | 2,88     | 60,65    |
| 964 | KLISTLIYK        | 1      | 1          | O14980                   |           | 5,833E6 | 0,018   | 0,1535 | 20       | 0,257484187 | 2   | 1078,68877 | 1,55     | 81,51    |
| 965 | SFGELALIY        | 1      | 2          | P10644;P31321            |           | 3,666E7 | 0,018   | 0,1528 | 18       | 4,519589646 | 2   | 1012,53777 | 2,72     | 157,66   |
| 966 | YIYDGELVSK       | 1      | 1          | Q9Y2D2                   |           | 5,211E6 | 0,018   | 0,153  | 17       | 7,587039955 | 2   | 1186,60173 | 2,25     | 91,08    |
| 967 | VVLEKAmHK        | 1      | 1          | Q8WYP3                   | M7        | 4,333E5 | 0,018   | 0,1492 | 17       | 4,898983856 | 2   | 1070,60661 | 3,62     | 26,58    |
| 968 | GYLHDFLKY        | 2      | 1          | Q15014                   |           | 5,922E7 | 0,018   | 0,1541 | 16       | 8,5571565   | 2   | 1155,58696 | 3,13     | 107,66   |
| 969 | RVLDFDVKRRK      | 1      | 1          | Q7Z6Z7                   |           | 2,496E6 | 0,018   | 0,1554 | 15       | 3,816310707 | 2   | 1275,75884 | 4,38     | 52,35    |
| 970 | NPPEFLHETY       | 1      | 1          | P55287                   |           | 4,531E6 | 0,018   | 0,154  | 12       | 20,51009545 | 2   | 1246,57842 | 3,61     | 95,90    |
| 971 | RCGKTDDLly       | 1      | 1          | Q9ULI1                   |           | 3,412E5 | 0,019   | 0,1561 | 41       | 0,026753374 | 2   | 1183,57878 | 0,97     | 145,98   |
| 972 | VPVDSKWLGHF<br>Y | 1      | 1          | P09327                   |           | 1,176E7 | 0,019   | 0,1567 | 36       | 0,138868427 | 3   | 1447,73975 | 1,96     | 113,99   |
| 973 | LPVHVFEAL        | 1      | 1          | Q9H4Z3                   |           | 4,005E6 | 0,019   | 0,1586 | 35       | 0,054257982 | 2   | 1024,58721 | 4,45     | 120,94   |
| 974 | KIIAFVLEGK       | 4      | 1          | O43493                   |           | 2,338E5 | 0,019   | 0,1559 | 34       | 0,021672567 | 2   | 1117,69805 | 0,02     | 93,71    |

| #   | Sequence   | # PSMs | # Proteins | Protein Group Accessions | Mod. (ox) | Area    | q-Value | PEP    | IonScore | Exp. Value  | Ch. | MH+ [Da]   | ΔM [ppm] | RT [min] |
|-----|------------|--------|------------|--------------------------|-----------|---------|---------|--------|----------|-------------|-----|------------|----------|----------|
| 975 | KVYNIQIRY  | 1      | 1          | Q13094                   |           | 3,113E7 | 0,019   | 0,1592 | 32       | 0,106807046 | 2   | 1196,68059 | 1,63     | 78,82    |
| 976 | NAIKESYDY  | 1      | 1          | O75530                   |           | 4,574E6 | 0,019   | 0,1592 | 27       | 0,426255935 | 2   | 1102,50749 | 2,12     | 62,58    |
| 977 | PVLPRLDPE  | 1      | 1          | Q9NRY2                   |           | 1,940E7 | 0,019   | 0,1575 | 27       | 0,620159398 | 2   | 1035,58623 | 2,75     | 96,87    |
| 978 | FPIHVQTSL  | 1      | 1          | Q9NVM4                   |           | 8,734E6 | 0,019   | 0,1561 | 24       | 0,790236295 | 2   | 1041,57414 | 1,30     | 104,58   |
| 979 | SPAGSIVHEL | 1      | 1          | O43776                   |           | 1,095E7 | 0,019   | 0,1581 | 23       | 2,201224774 | 2   | 1009,53472 | 3,35     | 83,31    |
| 980 | RPVEEIVTF  | 1      | 1          | P34949                   |           | 1,147E7 | 0,019   | 0,1591 | 22       | 2,419975519 | 2   | 1089,59709 | 2,89     | 103,11   |
| 981 | RPTGEIEQY  | 1      | 1          | P04114                   |           | 8,065E6 | 0,019   | 0,1569 | 22       | 3,169581179 | 2   | 1092,53557 | 3,22     | 54,73    |
| 982 | RPKLPEDPLL | 1      | 1          | P49327                   |           | 4,310E6 | 0,019   | 0,1567 | 19       | 1,916268394 | 2   | 1177,69927 | 4,47     | 88,18    |
| 983 | AFRQPSLFY  | 1      | 1          | Q99683                   |           | 9,871E6 | 0,019   | 0,1558 | 18       | 5,567080336 | 2   | 1128,58586 | 1,92     | 106,74   |
| 984 | ATYETKESK  | 1      | 2          | P23528;Q9Y281            |           | 7,577E5 | 0,019   | 0,1582 | 16       | 7,543063307 | 2   | 1056,52129 | 0,45     | 19,95    |
| 985 | RWLIPLEGK  | 1      | 1          | Q6JQN1                   |           | 1,052E6 | 0,019   | 0,1571 | 15       | 2,197441777 | 2   | 1224,75176 | 4,40     | 138,19   |
| 986 | KVLDKLLLY  | 1      | 1          | Q9BXP5                   |           | 6,706E6 | 0,019   | 0,1574 | 15       | 0,740242014 | 2   | 1104,70549 | 2,48     | 107,72   |
| 987 | ISFDKRAAAL | 1      | 1          | Q6NWFY9                  |           | 7,190E5 | 0,02    | 0,1597 | 45       | 0,008451575 | 2   | 1091,62029 | -0,50    | 75,83    |
| 988 | RAAESELAFP | 1      | 1          | P33076                   |           | 2,410E5 | 0,02    | 0,1597 | 35       | 0,151920433 | 2   | 1090,55596 | 2,88     | 114,66   |
| 989 | GTYRDANIK  | 1      | 1          | Q96PU8                   |           | 3,571E7 | 0,02    | 0,1602 | 26       | 1,038766376 | 2   | 1037,54094 | 3,34     | 31,02    |
| 990 | GVAPFTIAR  | 6      | 1          | P12111                   |           | 9,061E5 | 0,021   | 0,1646 | 54       | 0,001079898 | 2   | 931,53563  | -0,43    | 90,21    |
| 991 | APAQRAQSL  | 1      | 1          | Q63ZY3                   |           | 2,455E7 | 0,021   | 0,1639 | 41       | 0,020340288 | 2   | 941,51671  | 0,38     | 34,61    |
| 992 | TPISRLVAL  | 1      | 1          | Q9H765                   |           | 7,632E6 | 0,021   | 0,163  | 40       | 0,012649285 | 2   | 969,61070  | 1,56     | 107,36   |

| #    | Sequence    | # PSMs | # Proteins | Protein Group Accessions | Mod. (ox) | Area    | q-Value | PEP    | IonScore | Exp. Value  | Ch. | MH+ [Da]   | ΔM [ppm] | RT [min] |
|------|-------------|--------|------------|--------------------------|-----------|---------|---------|--------|----------|-------------|-----|------------|----------|----------|
| 993  | GVSGIFMKY   | 2      | 1          | Q96RQ1                   |           | 1,299E5 | 0,021   | 0,1659 | 38       | 0,077035307 | 2   | 1001,51268 | 0,17     | 103,17   |
| 994  | KVFDKPSAK   | 1      | 1          | Q8WVV9                   |           | 5,883E6 | 0,021   | 0,1606 | 35       | 0,079905591 | 2   | 1090,62749 | 1,75     | 30,78    |
| 995  | SVAKTILK    | 1      | 2          | Q9H8S9;Q7L9L4            |           | 9,475E6 | 0,021   | 0,165  | 35       | 0,021343252 | 2   | 859,56114  | -0,03    | 40,53    |
| 996  | SPSPNYQKY   | 1      | 1          | Q12778                   |           | 1,905E6 | 0,021   | 0,1608 | 34       | 0,129084425 | 2   | 1083,51164 | 1,00     | 48,09    |
| 997  | IKVQGILSY   | 4      | 1          | Q6NXT6                   |           | 7,881E5 | 0,021   | 0,1638 | 34       | 0,05277271  | 2   | 1020,60851 | -0,33    | 102,94   |
| 998  | AVSAVVHEY   | 1      | 1          | P35610                   |           | 1,506E7 | 0,021   | 0,1662 | 33       | 0,26164468  | 2   | 974,49846  | 4,37     | 63,45    |
| 999  | NVVKLLGEQY  | 1      | 1          | Q92785                   |           | 4,420E6 | 0,021   | 0,1637 | 30       | 0,291971516 | 2   | 1162,65044 | 3,22     | 100,52   |
| 1000 | ALHNHYTQK   | 1      | 3          | P01859;P01857;P01861     |           | 3,116E6 | 0,021   | 0,1651 | 27       | 0,76367192  | 2   | 1111,56511 | 0,70     | 20,21    |
| 1001 | KTLFPLIEAK  | 1      | 1          | P13010                   |           | 1,588E6 | 0,021   | 0,1646 | 26       | 0,195908879 | 2   | 1159,71037 | 1,55     | 98,40    |
| 1002 | FPNRVVFQEF  | 2      | 1          | P35579                   |           | 1,384E7 | 0,021   | 0,1663 | 26       | 0,990712122 | 2   | 1282,66240 | 3,48     | 118,97   |
| 1003 | RPPVQIEEL   | 1      | 1          | Q8IUI8                   |           | 1,336E6 | 0,021   | 0,1647 | 25       | 0,682269132 | 2   | 1080,60564 | 0,74     | 90,00    |
| 1004 | HAIRLLLEY   | 1      | 3          | P09488;Q03013;P46439     |           | 1,059E5 | 0,021   | 0,167  | 25       | 0,647019666 | 2   | 1127,65666 | -0,47    | 103,51   |
| 1005 | EPFHLIVSY   | 1      | 1          | Q7L513                   |           | 2,024E5 | 0,021   | 0,1671 | 25       | 1,498411204 | 2   | 1104,57219 | -0,24    | 131,41   |
| 1006 | VPASFRLQM   | 1      | 1          | Q9BTE3                   |           | 2,818E6 | 0,021   | 0,1611 | 24       | 1,42633921  | 2   | 1048,56255 | 1,60     | 101,78   |
| 1007 | KVSDYILQH   | 1      | 1          | O75129                   |           | 5,525E6 | 0,021   | 0,1664 | 24       | 1,758294347 | 2   | 1102,59233 | 2,88     | 72,68    |
| 1008 | KTIQVPQQK   | 1      | 1          | Q9BY77                   |           | 1,593E6 | 0,021   | 0,1629 | 22       | 1,034485442 | 2   | 1069,64141 | 4,62     | 35,09    |
| 1009 | KVVEGSFVYK  | 1      | 1          | P31150                   |           | 2,068E7 | 0,021   | 0,1664 | 19       | 5,437602525 | 2   | 1155,64250 | 1,40     | 60,95    |
| 1010 | LRLPALRLmNA | 1      | 1          | P13056                   | M9        | 0,000E0 | 0,021   | 0,1606 | 18       | 1,805660046 | 2   | 1283,76079 | -0,72    | 161,86   |

| #    | Sequence              | # PSMs | # Proteins | Protein Group Accessions | Mod. (ox) | Area    | q-Value | PEP    | IonScore | Exp. Value  | Ch. | MH+ [Da]   | ΔM [ppm] | RT [min] |
|------|-----------------------|--------|------------|--------------------------|-----------|---------|---------|--------|----------|-------------|-----|------------|----------|----------|
| 1011 | RPPFPGQI              | 1      | 1          | Q9HBZ2                   |           | 4,540E6 | 0,021   | 0,164  | 18       | 2,88991555  | 2   | 1039,57109 | 2,60     | 78,23    |
| 1012 | MENVHGHITIK           | 1      | 1          | Q92887                   |           | 8,586E6 | 0,021   | 0,1614 | 15       | 15,0062021  | 2   | 1278,66374 | 1,07     | 85,98    |
| 1013 | QPNGGASVIHAY          | 1      | 1          | Q6PCB5                   |           | 5,023E6 | 0,022   | 0,1677 | 31       | 0,259576108 | 2   | 1213,59612 | 0,05     | 68,15    |
| 1014 | IPLRHGGLSL            | 1      | 2          | Q99611;P49903            |           | 4,401E6 | 0,023   | 0,1698 | 42       | 0,005519872 | 2   | 1062,64311 | 1,15     | 75,69    |
| 1015 | TPTVIADVHY            | 1      | 1          | P01024                   |           | 0,000E0 | 0,023   | 0,1734 | 41       | 0,036168505 | 2   | 1000,54588 | -0,35    | 91,68    |
| 1016 | VPVAKTAEI             | 1      | 1          | P49790                   |           | 3,356E7 | 0,023   | 0,171  | 38       | 0,031624391 | 2   | 927,55242  | 1,51     | 62,43    |
| 1017 | RPGWLVSL              | 3      | 1          | Q15392                   |           | 2,737E7 | 0,023   | 0,17   | 38       | 0,031818305 | 2   | 1028,59111 | 2,26     | 121,83   |
| 1018 | DASKVVTVF             | 3      | 1          | O75083                   |           | 9,694E5 | 0,023   | 0,1735 | 37       | 0,062531523 | 2   | 965,53008  | -0,20    | 107,31   |
| 1019 | GPPRLLLLPL            | 3      | 1          | P09564                   |           | 2,531E7 | 0,023   | 0,1721 | 35       | 0,00254143  | 2   | 1088,72380 | 4,33     | 146,38   |
| 1020 | ATAPVSAQLK            | 1      | 1          | Q9NQ94                   |           | 1,880E6 | 0,023   | 0,1715 | 32       | 0,163746982 | 2   | 1056,60820 | 3,18     | 60,68    |
| 1021 | SVNGKVLK              | 3      | 3          | P69849;Q15155;Q5JPE7     |           | 3,531E8 | 0,023   | 0,1701 | 32       | 0,081932482 | 2   | 931,55644  | -0,76    | 29,97    |
| 1022 | AIFPSPmLY             | 1      | 1          | O95340                   | M7        | 6,735E6 | 0,023   | 0,1726 | 31       | 0,298563048 | 2   | 1054,52898 | 1,09     | 140,22   |
| 1023 | RPSAAGINL             | 2      | 1          | Q08211                   |           | 3,415E5 | 0,023   | 0,1712 | 31       | 0,195789979 | 2   | 898,51042  | -0,13    | 68,79    |
| 1024 | RLFTDVLH              | 1      | 1          | O14682                   |           | 1,018E7 | 0,023   | 0,1695 | 28       | 0,278838232 | 2   | 1113,64348 | 1,73     | 109,59   |
| 1025 | SLPTVIMRNK            | 1      | 1          | Q12802                   |           | 3,346E6 | 0,023   | 0,1717 | 28       | 0,420297999 | 2   | 1158,66887 | 2,13     | 69,25    |
| 1026 | RSPPPQSV              | 1      | 1          | Q5VV67                   |           | 9,598E6 | 0,023   | 0,1691 | 27       | 0,43713771  | 2   | 966,53923  | 2,57     | 52,78    |
| 1027 | SPFKADIE <sub>m</sub> | 1      | 1          | O75369                   | M9        | 6,123E6 | 0,023   | 0,1741 | 26       | 0,71403027  | 2   | 1053,49492 | 2,60     | 73,69    |
| 1028 | RTFTWLVGK             | 1      | 1          | O00159                   |           | 2,734E7 | 0,023   | 0,1728 | 26       | 0,277846856 | 2   | 1107,63396 | 2,68     | 90,90    |

| #    | Sequence    | # PSMs | # Proteins | Protein Group Accessions | Mod. (ox) | Area    | q-Value | PEP    | IonScore | Exp. Value  | Ch. | MH+ [Da]   | ΔM [ppm] | RT [min] |
|------|-------------|--------|------------|--------------------------|-----------|---------|---------|--------|----------|-------------|-----|------------|----------|----------|
| 1029 | IWDPDAVKI   | 1      | 1          | Q14195                   |           | 0,000E0 | 0,023   | 0,1743 | 24       | 0,656735847 | 2   | 1056,57390 | 1,34     | 113,33   |
| 1030 | VVFVIDPGFAK | 1      | 1          | O43143                   |           | 1,270E6 | 0,023   | 0,1712 | 24       | 0,886283216 | 2   | 1191,68083 | 2,97     | 128,05   |
| 1031 | NFYLVPLHY   | 3      | 1          | P39210                   |           | 8,992E4 | 0,023   | 0,1687 | 23       | 1,498093163 | 2   | 1165,60320 | -0,75    | 139,61   |
| 1032 | RPPAQGTVTF  | 1      | 1          | Q68DI1                   |           | 6,391E6 | 0,023   | 0,1726 | 23       | 1,7013817   | 2   | 1073,57585 | 1,85     | 66,79    |
| 1033 | KVGRDVVQK   | 1      | 1          | P35749                   |           | 1,221E7 | 0,023   | 0,174  | 23       | 1,009522834 | 2   | 1028,62126 | 0,10     | 18,16    |
| 1034 | QTNPTYLAK   | 1      | 1          | P46940                   |           | 2,580E6 | 0,023   | 0,1704 | 21       | 3,965908927 | 2   | 1035,54753 | 0,55     | 49,97    |
| 1035 | KIDDTIRYL   | 1      | 1          | Q6UXN9                   |           | 7,322E6 | 0,023   | 0,1721 | 20       | 2,880070284 | 2   | 1136,63506 | 3,53     | 90,51    |
| 1036 | TAYGSTVSK   | 1      | 1          | P04114                   |           | 4,219E7 | 0,023   | 0,1686 | 20       | 3,563627618 | 2   | 913,46330  | 0,81     | 32,14    |
| 1037 | RPQAPALHL   | 1      | 1          | Q99988                   |           | 5,210E6 | 0,023   | 0,1679 | 20       | 2,748591061 | 2   | 1002,58379 | -0,58    | 68,02    |
| 1038 | LPEDRALYY   | 1      | 1          | Q99558                   |           | 2,324E6 | 0,023   | 0,1728 | 19       | 4,602065713 | 2   | 1139,57756 | 3,84     | 91,24    |
| 1039 | RLYSVTVTK   | 1      | 1          | P23467                   |           | 2,683E6 | 0,023   | 0,1721 | 19       | 2,025274731 | 2   | 1167,67339 | 0,13     | 57,35    |
| 1040 | RVRDVFEAK   | 1      | 1          | P12268                   |           | 1,467E7 | 0,023   | 0,1691 | 19       | 3,319579765 | 2   | 1119,63042 | 3,07     | 44,08    |
| 1041 | SPYLPRGDPVL | 2      | 1          | P49754                   |           | 2,545E7 | 0,023   | 0,1721 | 15       | 10,84865889 | 2   | 1213,66155 | 3,25     | 100,28   |
| 1042 | AILDKTTNK   | 1      | 2          | P29558;Q15434            |           | 2,371E7 | 0,024   | 0,175  | 41       | 0,022166844 | 2   | 1003,57915 | 0,86     | 33,12    |
| 1043 | MLMLPLLLL   | 1      | 1          | A6NNS2                   |           | 4,504E5 | 0,024   | 0,1767 | 40       | 0,011174977 | 2   | 1056,65618 | 0,14     | 122,41   |
| 1044 | RVmKALVNR   | 1      | 1          | Q08945                   | M3        | 7,536E6 | 0,024   | 0,1778 | 32       | 0,10146646  | 2   | 1102,65557 | 3,75     | 26,75    |
| 1045 | IYKGGTSR    | 2      | 1          | P06396                   |           | 1,119E8 | 0,024   | 0,1762 | 28       | 0,294875913 | 2   | 994,56951  | 1,47     | 31,22    |
| 1046 | RIFQKFLQR   | 2      | 1          | Q12965                   |           | 4,582E7 | 0,024   | 0,1756 | 28       | 0,182075898 | 3   | 1235,73841 | 0,98     | 69,76    |

| #    | Sequence     | # PSMs | # Proteins | Protein Group Accessions | Mod. (ox) | Area    | q-Value | PEP    | IonScore | Exp. Value  | Ch. | MH+ [Da]   | ΔM [ppm] | RT [min] |
|------|--------------|--------|------------|--------------------------|-----------|---------|---------|--------|----------|-------------|-----|------------|----------|----------|
| 1047 | GLNVSSISRK   | 1      | 1          | P82979                   |           | 1,847E6 | 0,024   | 0,1744 | 27       | 0,574810356 | 2   | 1060,61150 | 0,49     | 50,22    |
| 1048 | CDPVIERRPR   | 1      | 1          | Q6P5Z2                   |           | 2,073E6 | 0,024   | 0,177  | 24       | 1,240900763 | 2   | 1240,65752 | -0,37    | 106,80   |
| 1049 | IPLPLVKSL    | 1      | 1          | Q9H0A0                   |           | 3,965E6 | 0,024   | 0,1776 | 22       | 0,068561205 | 2   | 979,65801  | 2,99     | 122,69   |
| 1050 | RPSQFPHSL    | 1      | 1          | Q96RT8                   |           | 2,634E6 | 0,024   | 0,1746 | 22       | 1,953256111 | 2   | 1068,55962 | 1,01     | 57,19    |
| 1051 | NLLRAFYEL    | 1      | 1          | Q9NRD5                   |           | 2,499E5 | 0,024   | 0,1774 | 18       | 4,285641298 | 2   | 1138,62517 | -0,34    | 119,87   |
| 1052 | NYLHDFLKY    | 2      | 1          | Q9UBU8                   |           | 1,347E7 | 0,024   | 0,1743 | 18       | 6,27712661  | 2   | 1212,60942 | 3,81     | 109,88   |
| 1053 | RTSLPWQGL    | 1      | 2          | Q8N752;P48729            |           | 4,440E6 | 0,024   | 0,1785 | 18       | 4,017907898 | 2   | 1057,58269 | 3,53     | 109,14   |
| 1054 | HLETPLVVK    | 1      | 1          | Q8WYP5                   |           | 2,229E6 | 0,024   | 0,1785 | 18       | 1,007387739 | 2   | 1148,70574 | 1,67     | 90,01    |
| 1055 | KLLEPVLLLGK  | 1      | 1          | P62249                   |           | 4,789E7 | 0,024   | 0,1746 | 18       | 0,214645745 | 2   | 1222,81645 | 2,50     | 113,56   |
| 1056 | HLKEDLNLNR   | 1      | 1          | O76003                   |           | 3,971E6 | 0,024   | 0,1767 | 18       | 3,907990137 | 2   | 1137,63713 | -0,35    | 50,11    |
| 1057 | KDLIRFKP     | 3      | 1          | Q86YR7                   |           | 2,832E6 | 0,024   | 0,1759 | 17       | 2,141682692 | 2   | 1016,62456 | -0,61    | 69,96    |
| 1058 | RPAEVGGmQL   | 1      | 1          | P33316                   | M8        | 6,377E6 | 0,025   | 0,1804 | 42       | 0,032176136 | 2   | 1073,54424 | 3,13     | 54,91    |
| 1059 | HPQPTQVQF    | 1      | 1          | P51610                   |           | 1,796E7 | 0,025   | 0,1804 | 41       | 0,023269786 | 2   | 1081,54497 | 2,24     | 69,12    |
| 1060 | KTWTVVDAKTLK | 1      | 1          | P13010                   |           | 4,823E6 | 0,025   | 0,1798 | 29       | 0,211792809 | 3   | 1389,80994 | -0,11    | 66,18    |
| 1061 | RLLDQIVEK    | 1      | 1          | Q96AE4                   |           | 3,707E6 | 0,025   | 0,181  | 28       | 0,325461205 | 2   | 1113,66594 | 2,92     | 79,11    |
| 1062 | HAVSPIAKY    | 1      | 1          | Q8NDF8                   |           | 4,252E6 | 0,025   | 0,1798 | 27       | 0,35462469  | 2   | 985,54875  | 2,21     | 48,41    |
| 1063 | RLGSTVATGK   | 1      | 1          | Q969X6                   |           | 1,806E6 | 0,025   | 0,1794 | 26       | 0,601173706 | 2   | 989,57463  | 0,77     | 29,63    |
| 1064 | ASYENVRAK    | 1      | 1          | P15153                   |           | 3,859E6 | 0,025   | 0,1793 | 26       | 0,887401593 | 2   | 1037,53801 | 0,52     | 29,79    |

| #    | Sequence    | # PSMs | # Proteins | Protein Group Accessions                                                                                                                                                                                                                             | Mod. (ox) | Area    | q-Value | PEP    | IonScore | Exp. Value  | Ch. | MH+ [Da]   | ΔM [ppm] | RT [min] |
|------|-------------|--------|------------|------------------------------------------------------------------------------------------------------------------------------------------------------------------------------------------------------------------------------------------------------|-----------|---------|---------|--------|----------|-------------|-----|------------|----------|----------|
| 1065 | GSHSMRYFYT  | 1      | 35         | P01891;P10316;P13746;P18462;P30450;P30453;P30456;P30457;P01889;P30461;P30462;P30464;P30685;Q95365;P30475;P30480;P30481;P30484;P30485;P30486;P18464;P30490;P30491;P30492;P30493;P30495;P18465;P10319;Q29940;Q29836;P30498;Q31610;Q29718;P04222;Q95604 |           | 2,171E7 | 0,025   | 0,18   | 21       | 1,654935802 | 2   | 1248,54766 | 0,81     | 66,17    |
| 1066 | KLYEEGSNK   | 1      | 1          | P25788                                                                                                                                                                                                                                               |           | 2,902E6 | 0,025   | 0,1802 | 19       | 4,984903277 | 2   | 1067,54167 | 4,56     | 27,12    |
| 1067 | KTLDEILQEK  | 1      | 2          | Q9UQ88;P21127                                                                                                                                                                                                                                        |           | 1,761E6 | 0,025   | 0,1797 | 18       | 4,691148849 | 2   | 1216,68328 | 4,01     | 83,27    |
| 1068 | IPTDVLKIVY  | 1      | 1          | Q6P179                                                                                                                                                                                                                                               |           | 1,561E6 | 0,026   | 0,182  | 29       | 0,115877627 | 2   | 1160,69646 | 3,34     | 132,66   |
| 1069 | AmHGFLYH    | 1      | 1          | Q99707                                                                                                                                                                                                                                               | M2        | 3,210E6 | 0,026   | 0,1816 | 27       | 0,497858594 | 2   | 1090,51396 | 0,06     | 65,96    |
| 1070 | KQLTSHPWK   | 1      | 1          | Q6ZNB7                                                                                                                                                                                                                                               |           | 2,198E6 | 0,026   | 0,1824 | 21       | 1,934068266 | 2   | 1124,62065 | -0,43    | 34,47    |
| 1071 | ATAVHAYRY   | 1      | 1          | Q5T1M5                                                                                                                                                                                                                                               |           | 9,223E5 | 0,026   | 0,1828 | 20       | 3,364793988 | 2   | 1051,53374 | 1,68     | 41,85    |
| 1072 | KTYGVSFFLVK | 1      | 1          | Q9Y490                                                                                                                                                                                                                                               |           | 2,445E6 | 0,026   | 0,1814 | 15       | 9,574639308 | 2   | 1288,73442 | 3,41     | 107,71   |
| 1073 | APPRTQFSGL  | 1      | 1          | O00754                                                                                                                                                                                                                                               |           | 1,293E7 | 0,027   | 0,183  | 19       | 3,731828805 | 2   | 1073,57524 | 1,28     | 75,56    |
| 1074 | LmLPEKLRPLY | 1      | 1          | O95563                                                                                                                                                                                                                                               | M2        | 8,688E6 | 0,027   | 0,1833 | 15       | 6,428149927 | 3   | 1388,79920 | 1,52     | 106,42   |
| 1075 | RPQSGANGL   | 1      | 1          | Q8WVX3                                                                                                                                                                                                                                               |           | 1,075E7 | 0,028   | 0,1854 | 59       | 0,000244416 | 2   | 899,47118  | 1,98     | 31,19    |
| 1076 | APAPAPARSL  | 1      | 1          | Q6QNY0                                                                                                                                                                                                                                               |           | 5,827E6 | 0,028   | 0,1852 | 43       | 0,009076864 | 2   | 950,54582  | 4,18     | 53,52    |
| 1077 | HNADQPLRV   | 1      | 2          | Q99613;B5ME19                                                                                                                                                                                                                                        |           | 1,449E7 | 0,028   | 0,1846 | 40       | 0,03881997  | 2   | 1049,55083 | 2,02     | 44,29    |
| 1078 | VPPPPHRPL   | 1      | 1          | Q9Y520                                                                                                                                                                                                                                               |           | 1,834E7 | 0,028   | 0,1862 | 35       | 0,031577939 | 2   | 1009,59349 | -0,71    | 48,98    |
| 1079 | HPISDHEATL  | 1      | 39         | P30447;P05534;P30443;P04439;P13746;P16188;P30455;Q09160                                                                                                                                                                                              |           | 1,110E8 | 0,028   | 0,1859 | 32       | 0,244491794 | 2   | 1119,54534 | 2,13     | 48,51    |

| #    | Sequence    | # PSMs | # Proteins | Protein Group Accessions                                                                                                                                                                                                  | Mod. (ox) | Area    | q-Value | PEP    | IonScore | Exp. Value  | Ch. | MH+ [Da]   | ΔM [ppm] | RT [min] |
|------|-------------|--------|------------|---------------------------------------------------------------------------------------------------------------------------------------------------------------------------------------------------------------------------|-----------|---------|---------|--------|----------|-------------|-----|------------|----------|----------|
|      |             |        |            | ;P01889;P30460;P30461;P30462;P30464;P30466;P03989;P18463;Q95365;P30475;Q04826;P30479;P30480;P30483;P30484;P30485;P30486;P30487;P30488;P30492;P30493;P30495;P18465;Q29940;Q29836;Q31612;Q31610;Q29718;P01893;P13747;P30511 |           |         |         |        |          |             |     |            |          |          |
| 1080 | MPNVKVAVF   | 2      | 1          | Q13838                                                                                                                                                                                                                    |           | 1,229E7 | 0,028   | 0,1849 | 30       | 0,257658691 | 2   | 1004,56236 | 2,54     | 106,33   |
| 1081 | AFSAEPLLIY  | 2      | 1          | Q8IYK4                                                                                                                                                                                                                    |           | 1,885E6 | 0,028   | 0,1867 | 28       | 0,455625587 | 2   | 1123,60344 | 0,01     | 155,87   |
| 1082 | RKLAHmRR    | 1      | 1          | Q9H9H4                                                                                                                                                                                                                    | M6        | 3,328E5 | 0,028   | 0,185  | 28       | 0,241536292 | 2   | 1083,63103 | -0,61    | 34,85    |
| 1083 | KPAKTQKTSL  | 1      | 1          | O15539                                                                                                                                                                                                                    |           | 1,623E6 | 0,028   | 0,1836 | 27       | 0,307569686 | 2   | 1101,66301 | 0,30     | 20,10    |
| 1084 | GTLNQPLTK   | 1      | 1          | Q15650                                                                                                                                                                                                                    |           | 1,118E7 | 0,028   | 0,184  | 26       | 0,861300218 | 2   | 971,55559  | 3,63     | 52,35    |
| 1085 | KVLQIGSAK   | 1      | 1          | Q9UGM6                                                                                                                                                                                                                    |           | 4,165E6 | 0,028   | 0,1839 | 26       | 0,336289824 | 2   | 943,59349  | -0,05    | 41,63    |
| 1086 | QDLLSQIAQ   | 1      | 1          | Q5EBL4                                                                                                                                                                                                                    |           | 2,952E7 | 0,028   | 0,1842 | 25       | 1,344055539 | 2   | 1015,54259 | 0,69     | 47,65    |
| 1087 | TVEEGQRLK   | 1      | 3          | Q8N4C8;Q9UKE5;O95819                                                                                                                                                                                                      |           | 5,830E6 | 0,028   | 0,1864 | 23       | 2,044274319 | 2   | 1059,57854 | -0,77    | 29,15    |
| 1088 | SPWKPPPTYL  | 1      | 1          | Q8IY47                                                                                                                                                                                                                    |           | 1,163E7 | 0,028   | 0,1846 | 23       | 2,844855045 | 2   | 1088,57878 | 1,14     | 104,28   |
| 1089 | SVIEQILHY   | 1      | 1          | Q15386                                                                                                                                                                                                                    |           | 5,077E4 | 0,028   | 0,1839 | 23       | 2,674792998 | 2   | 1101,59368 | -0,21    | 136,11   |
| 1090 | LPAPPTQNM   | 1      | 2          | Q15532;O75177                                                                                                                                                                                                             |           | 2,522E7 | 0,028   | 0,1838 | 22       | 2,711023014 | 2   | 968,49108  | 4,18     | 88,06    |
| 1091 | AIYGTRKFK   | 2      | 1          | Q2M385                                                                                                                                                                                                                    |           | 3,328E5 | 0,028   | 0,1857 | 21       | 1,071475871 | 2   | 1083,63140 | 0,38     | 35,03    |
| 1092 | NPISGLGGTKY | 1      | 1          | Q14192                                                                                                                                                                                                                    |           | 3,089E6 | 0,028   | 0,1848 | 21       | 3,278463901 | 2   | 1106,58537 | 1,16     | 78,72    |
| 1093 | RPSGKGIVEF  | 1      | 1          | Q15233                                                                                                                                                                                                                    |           | 7,557E7 | 0,028   | 0,1839 | 18       | 5,592474203 | 2   | 1089,61040 | 4,79     | 63,39    |



| #    | Sequence   | # PSMs | # Proteins | Protein Group Accessions | Mod. (ox) | Area    | q-Value | PEP    | IonScore | Exp. Value  | Ch. | MH+ [Da]   | ΔM [ppm] | RT [min] |
|------|------------|--------|------------|--------------------------|-----------|---------|---------|--------|----------|-------------|-----|------------|----------|----------|
| 1094 | QTLQRSWAY  | 1      | 1          | Q9Y6J8                   |           | 4,400E6 | 0,028   | 0,186  | 15       | 9,976788282 | 2   | 1152,58281 | 2,73     | 78,41    |
| 1095 | KCPEDRTSEE | 1      | 1          | Q9BU70                   |           | 1,403E5 | 0,028   | 0,1859 | 12       | 9,937860702 | 2   | 1193,51091 | 0,47     | 77,56    |
| 1096 | LPTENVDKM  | 1      | 1          | Q9Y4C2                   |           | 2,842E6 | 0,028   | 0,1842 | 12       | 27,59496213 | 2   | 1046,52031 | 1,51     | 68,23    |
| 1097 | SPFCRARLSL | 1      | 1          | Q13370                   |           | 5,679E5 | 0,03    | 0,188  | 41       | 0,03464147  | 2   | 1149,61540 | -3,81    | 108,31   |
| 1098 | RPAAPGQTPL | 1      | 1          | Q12796                   |           | 9,302E6 | 0,03    | 0,1886 | 40       | 0,02434219  | 2   | 1007,56725 | 3,91     | 55,64    |
| 1099 | ATITKVLQK  | 1      | 1          | Q9BYK8                   |           | 3,680E6 | 0,03    | 0,1873 | 38       | 0,005910094 | 2   | 1001,63408 | -1,32    | 48,82    |
| 1100 | APWGGVAKTL | 2      | 1          | Q8NCC3                   |           | 7,752E6 | 0,03    | 0,1876 | 35       | 0,047416985 | 2   | 999,56420  | 1,95     | 91,77    |
| 1101 | YPNGVVVHY  | 1      | 1          | Q96JC1                   |           | 6,697E6 | 0,03    | 0,1879 | 27       | 0,905216109 | 2   | 1047,52910 | 3,13     | 82,75    |
| 1102 | YIFKERESF  | 1      | 1          | Q8N9N2                   |           | 2,989E6 | 0,03    | 0,1879 | 23       | 2,420483745 | 2   | 1218,61894 | 2,92     | 76,94    |
| 1103 | RPAQVSQPF  | 1      | 1          | Q9Y520                   |           | 1,766E7 | 0,03    | 0,1879 | 21       | 2,311904934 | 2   | 1029,54949 | 1,78     | 62,81    |
| 1104 | mPAETIKEL  | 1      | 1          | Q9H694                   | M1        | 6,748E6 | 0,031   | 0,1905 | 39       | 0,042557247 | 2   | 1047,54167 | 2,42     | 69,08    |
| 1105 | SLNQAVVSK  | 1      | 1          | P61201                   |           | 1,402E7 | 0,031   | 0,1906 | 39       | 0,04131839  | 2   | 945,53502  | -1,47    | 45,83    |
| 1106 | ATWKNAVRH  | 1      | 3          | O15409;Q9H334;Q8IVH2     |           | 2,497E6 | 0,031   | 0,1906 | 32       | 0,198117226 | 2   | 1082,58769 | 2,09     | 30,94    |
| 1107 | LPVDKAQEL  | 1      | 1          | Q8TEX9                   |           | 5,113E6 | 0,031   | 0,1909 | 30       | 0,220223484 | 2   | 1012,56993 | 2,51     | 72,98    |
| 1108 | RVYSQITVQK | 1      | 1          | Q12929                   |           | 9,918E5 | 0,031   | 0,1906 | 21       | 1,832420743 | 2   | 1221,69487 | -0,13    | 48,79    |
| 1109 | SSFSGLLRK  | 1      | 1          | Q5VY09                   |           | 1,530E7 | 0,031   | 0,1904 | 18       | 3,640346111 | 2   | 994,56804  | -0,01    | 65,52    |
| 1110 | AVHLKTLK   | 1      | 1          | Q12796                   |           | 1,194E6 | 0,031   | 0,1901 | 15       | 0,477734129 | 2   | 1022,67394 | 1,78     | 54,70    |
| 1111 | RDVKQmLLK  | 1      | 1          | Q9H074                   | M6        | 2,943E6 | 0,031   | 0,1903 | 13       | 9,115635273 | 2   | 1146,66741 | 0,87     | 58,16    |

| #    | Sequence    | # PSMs | # Proteins | Protein Group Accessions | Mod. (ox) | Area    | q-Value | PEP    | IonScore | Exp. Value  | Ch. | MH+ [Da]   | ΔM [ppm] | RT [min] |
|------|-------------|--------|------------|--------------------------|-----------|---------|---------|--------|----------|-------------|-----|------------|----------|----------|
| 1112 | YVYPLQLKY   | 1      | 1          | Q5JSL3                   |           | 1,823E7 | 0,031   | 0,1902 | 13       | 18,08277536 | 2   | 1186,65337 | 2,26     | 115,84   |
| 1113 | RPPGPASQSL  | 1      | 1          | Q15477                   |           | 1,363E6 | 0,032   | 0,1932 | 26       | 0,95675329  | 2   | 1009,54271 | 0,14     | 50,32    |
| 1114 | IPARIVTNY   | 2      | 1          | P00488                   |           | 2,252E7 | 0,032   | 0,1933 | 25       | 0,826950292 | 2   | 1046,59953 | 0,18     | 78,85    |
| 1115 | KQYDEALNK   | 1      | 1          | P78527                   |           | 2,451E6 | 0,032   | 0,1921 | 15       | 14,28810457 | 2   | 1108,56584 | 2,25     | 34,65    |
| 1116 | KVFVGRFK    | 1      | 3          | Q13310;P11940;POCB38     |           | 4,733E6 | 0,032   | 0,1925 | 15       | 1,837056556 | 2   | 980,60466  | 0,62     | 43,29    |
| 1117 | APIDRVGQTI  | 1      | 1          | P52272                   |           | 5,932E6 | 0,033   | 0,1971 | 30       | 0,293207274 | 2   | 1069,60283 | 2,56     | 77,41    |
| 1118 | RPYAGAVQKF  | 1      | 1          | P49842                   |           | 8,485E6 | 0,033   | 0,1965 | 29       | 0,295264194 | 2   | 1136,62517 | 3,54     | 52,70    |
| 1119 | FPMTHGNTGF  | 1      | 1          | Q15366                   |           | 4,870E6 | 0,033   | 0,1971 | 27       | 0,474114545 | 2   | 1108,49101 | 2,64     | 85,26    |
| 1120 | RVAPEEHPVL  | 3      | 3          | P60709;P63261;A5A3E0     |           | 9,987E7 | 0,033   | 0,1943 | 26       | 0,766540973 | 2   | 1146,63042 | 3,29     | 56,92    |
| 1121 | GLDPSQRPK   | 1      | 1          | Q8WVB6                   |           | 4,903E6 | 0,033   | 0,1969 | 26       | 0,589873133 | 2   | 997,54418  | 1,61     | 34,12    |
| 1122 | MPVPGHDVEAY | 1      | 1          | Q9P0T7                   |           | 4,921E6 | 0,033   | 0,1945 | 25       | 0,79684543  | 2   | 1214,55425 | 2,60     | 83,85    |
| 1123 | SPFFSPIHL   | 1      | 1          | Q8IVT2                   |           | 1,501E6 | 0,033   | 0,1949 | 24       | 1,729375486 | 2   | 1044,55498 | 3,49     | 132,37   |
| 1124 | RLTTPVFGK   | 1      | 1          | Q16850                   |           | 1,995E7 | 0,033   | 0,1939 | 22       | 0,962174998 | 2   | 1018,60338 | -1,04    | 64,84    |
| 1125 | FLEKAQTYT   | 1      | 1          | Q6IQ26                   |           | 3,106E5 | 0,033   | 0,1957 | 16       | 11,27495497 | 2   | 1162,57793 | 0,01     | 112,11   |
| 1126 | QPNPVEQRY   | 1      | 1          | Q13496                   |           | 2,456E6 | 0,033   | 0,1947 | 15       | 14,27231451 | 2   | 1130,56316 | 3,74     | 54,79    |
| 1127 | ALYKLGFFK   | 2      | 1          | P11215                   |           | 3,197E6 | 0,033   | 0,1961 | 13       | 9,049829327 | 2   | 1086,63616 | 1,37     | 101,52   |
| 1128 | SVLRLSVSY   | 2      | 2          | P35869;A9YTQ3            |           | 1,240E5 | 0,034   | 0,1986 | 43       | 0,011312067 | 2   | 1023,58257 | -0,77    | 103,28   |
| 1129 | RPWDPVAVGL  | 1      | 1          | Q9P2N6                   |           | 6,403E6 | 0,034   | 0,1982 | 39       | 0,025128269 | 2   | 1109,61284 | 2,32     | 116,16   |

| #    | Sequence    | # PSMs | # Proteins | Protein Group Accessions | Mod. (ox) | Area    | q-Value | PEP    | IonScore | Exp. Value  | Ch. | MH+ [Da]   | ΔM [ppm] | RT [min] |
|------|-------------|--------|------------|--------------------------|-----------|---------|---------|--------|----------|-------------|-----|------------|----------|----------|
| 1130 | APEEHPVL    | 2      | 3          | P60709;P63261;A5A3E0     |           | 3,996E8 | 0,034   | 0,1982 | 38       | 0,112743854 | 2   | 891,45683  | -0,30    | 57,81    |
| 1131 | RVDDHLMGK   | 1      | 1          | O95232                   | M7        | 1,664E6 | 0,034   | 0,1983 | 35       | 0,110802984 | 2   | 1086,53728 | 1,07     | 28,19    |
| 1132 | SAVDVHINM   | 1      | 1          | P46379                   |           | 2,871E5 | 0,034   | 0,1993 | 34       | 0,13069798  | 2   | 985,47392  | -3,31    | 94,33    |
| 1133 | GPLDKWRAL   | 2      | 1          | P27635                   |           | 7,986E7 | 0,034   | 0,1997 | 29       | 0,245426335 | 2   | 1055,59953 | -0,16    | 96,24    |
| 1134 | RIHGVGFKK   | 1      | 1          | P62899                   |           | 2,010E6 | 0,034   | 0,1986 | 25       | 0,500658309 | 2   | 1041,63164 | -0,02    | 28,38    |
| 1135 | TPGGTRIIY   | 1      | 3          | Q13541;Q13542;O60516     |           | 3,142E7 | 0,034   | 0,1982 | 23       | 1,953802058 | 2   | 977,54271  | 1,25     | 70,83    |
| 1136 | RAAEHTLLH   | 1      | 1          | Q9BYK8                   |           | 1,279E6 | 0,034   | 0,1986 | 22       | 2,203824657 | 2   | 1047,57085 | 1,34     | 30,41    |
| 1137 | RTFGHLLRY   | 1      | 1          | Q13200                   |           | 1,531E7 | 0,034   | 0,198  | 18       | 4,912363863 | 2   | 1162,64885 | 0,71     | 67,14    |
| 1138 | QVVLmLVKEC  | 1      | 1          | Q8WZ74                   | M5        | 2,364E5 | 0,034   | 0,1987 | 18       | 6,522384705 | 2   | 1177,62871 | -2,79    | 140,23   |
| 1139 | RTDVHIRVF   | 1      | 1          | Q13454                   |           | 2,859E6 | 0,034   | 0,1983 | 15       | 8,494266264 | 2   | 1142,64141 | -1,35    | 68,70    |
| 1140 | TREDPNLVPSI | 5      | 1          | P10606                   |           | 2,098E6 | 0,035   | 0,2006 | 29       | 0,45606433  | 2   | 1240,65764 | 3,54     | 107,04   |
| 1141 | HPDAPmSQVY  | 1      | 2          | Q15014;Q9UBU8            | M6        | 2,167E7 | 0,035   | 0,201  | 21       | 1,518910721 | 2   | 1160,50823 | 3,53     | 56,86    |
| 1142 | KLKSTSELK   | 1      | 1          | Q92878                   |           | 1,354E6 | 0,035   | 0,2007 | 16       | 3,982826978 | 2   | 1162,67290 | 4,36     | 26,48    |
| 1143 | APARLFAL    | 3      | 1          | P31431                   |           | 3,894E5 | 0,036   | 0,2017 | 43       | 0,011354297 | 2   | 858,51940  | -0,30    | 102,76   |
| 1144 | GLLTKPIVK   | 1      | 2          | Q86V97;Q8WVZ9            |           | 9,430E6 | 0,036   | 0,2033 | 41       | 0,00180298  | 2   | 968,65416  | 3,95     | 63,69    |
| 1145 | RIAKNLVEK   | 1      | 1          | Q9H4A5;Q9H4A6            |           | 4,633E6 | 0,036   | 0,2059 | 37       | 0,02378097  | 2   | 1070,66948 | 1,28     | 30,75    |
| 1146 | VPLPPPGRSL  | 1      | 2          | Q6IQ26;Q6ZUT9            |           | 2,404E7 | 0,036   | 0,2028 | 33       | 0,067333851 | 2   | 1032,62114 | 1,01     | 82,42    |
| 1147 | KINNWIVQL   | 1      | 2          | P22415;Q15853            |           | 4,067E6 | 0,036   | 0,2016 | 33       | 0,066183063 | 2   | 1127,66094 | 3,31     | 123,38   |

| #    | Sequence    | # PSMs | # Proteins | Protein Group Accessions                         | Mod. (ox) | Area    | q-Value | PEP    | IonScore | Exp. Value  | Ch. | MH+ [Da]   | ΔM [ppm] | RT [min] |
|------|-------------|--------|------------|--------------------------------------------------|-----------|---------|---------|--------|----------|-------------|-----|------------|----------|----------|
| 1148 | RPPIGSISSM  | 1      | 1          | Q9BQY9                                           |           | 3,748E6 | 0,036   | 0,2013 | 32       | 0,234197053 | 2   | 1044,55181 | 1,06     | 78,94    |
| 1149 | RQAVPLFSK   | 1      | 1          | Q9BZZ5                                           |           | 9,553E6 | 0,036   | 0,204  | 30       | 0,173151611 | 2   | 1045,62041 | 4,85     | 63,58    |
| 1150 | GTPLLVIANK  | 1      | 1          | P56559                                           |           | 5,968E6 | 0,036   | 0,2077 | 28       | 0,114284118 | 2   | 1025,63860 | 3,11     | 94,45    |
| 1151 | FPVEIKSFY   | 2      | 1          | O43776                                           |           | 1,228E7 | 0,036   | 0,2067 | 28       | 0,698608999 | 2   | 1129,59526 | 2,13     | 123,82   |
| 1152 | AVLQSPGLSGK | 1      | 1          | Q13045                                           |           | 3,984E6 | 0,036   | 0,2032 | 27       | 0,563211545 | 2   | 1056,60527 | 0,41     | 67,44    |
| 1153 | RPPFTYATL   | 1      | 2          | O15409;Q9BZS1                                    |           | 4,237E6 | 0,036   | 0,2054 | 24       | 1,024040382 | 2   | 1065,57475 | 1,84     | 100,24   |
| 1154 | LPDERTISL   | 1      | 1          | Q05048                                           |           | 1,515E5 | 0,036   | 0,2066 | 22       | 2,13361549  | 2   | 1043,57329 | 0,08     | 100,65   |
| 1155 | VLNAALREK   | 1      | 1          | Q8TAP8                                           |           | 1,681E6 | 0,036   | 0,2067 | 22       | 1,0704056   | 2   | 1013,61223 | 1,94     | 44,23    |
| 1156 | MVTEIRLKY   | 1      | 1          | Q15393                                           |           | 1,191E5 | 0,036   | 0,2065 | 22       | 1,381835971 | 2   | 1152,64458 | -0,01    | 83,00    |
| 1157 | GSHSmRYFF   | 1      | 7          | P01892;P30443;P04439;P10314;P30455;P30459;Q09160 | M5        | 2,341E7 | 0,036   | 0,2057 | 22       | 1,204368411 | 2   | 1147,50273 | 3,27     | 69,44    |
| 1158 | ALYGVVNVKK  | 1      | 1          | O94952                                           |           | 1,223E6 | 0,036   | 0,2081 | 20       | 0,933192579 | 2   | 1090,66631 | 3,99     | 63,77    |
| 1159 | TIADLELHY   | 1      | 1          | P15924                                           |           | 3,061E7 | 0,036   | 0,2045 | 20       | 4,695481711 | 2   | 1074,54924 | 2,43     | 113,50   |
| 1160 | EVFPLAmNY   | 1      | 3          | P24385;P30281;P30279                             | M7        | 4,179E6 | 0,036   | 0,2016 | 19       | 3,153024371 | 2   | 1099,51506 | 1,96     | 129,72   |
| 1161 | APFKFDmEL   | 1      | 1          | P28482                                           | M7        | 4,613E6 | 0,036   | 0,2036 | 17       | 6,702304995 | 2   | 1113,52983 | 1,13     | 108,66   |
| 1162 | QLMKALLKH   | 1      | 1          | Q9BRR0                                           |           | 1,169E6 | 0,036   | 0,205  | 15       | 1,362217142 | 2   | 1081,65349 | -1,49    | 39,43    |
| 1163 | VGIYPNAQIY  | 1      | 1          | Q8NDV1                                           |           | 4,733E7 | 0,036   | 0,2021 | 14       | 14,37027194 | 2   | 1137,59831 | 3,87     | 119,19   |
| 1164 | RLYPTPRVR   | 1      | 1          | Q9NXW2                                           |           | 2,316E7 | 0,036   | 0,2025 | 13       | 9,743141347 | 2   | 1157,69304 | 2,43     | 47,13    |
| 1165 | YYDNADKL    | 1      | 1          | Q8IY63                                           |           | 7,062E6 | 0,036   | 0,203  | 12       | 16,29727826 | 2   | 1001,46092 | 3,45     | 63,06    |

| #    | Sequence     | # PSMs | # Proteins | Protein Group Accessions | Mod. (ox) | Area    | q-Value | PEP    | IonScore | Exp. Value  | Ch. | MH+ [Da]   | $\Delta$ M [ppm] | RT [min] |
|------|--------------|--------|------------|--------------------------|-----------|---------|---------|--------|----------|-------------|-----|------------|------------------|----------|
| 1166 | LASRPLLL     | 1      | 1          | Q9P2B2                   |           | 1,029E7 | 0,037   | 0,2111 | 42       | 0,002402118 | 2   | 882,57842  | 1,42             | 94,43    |
| 1167 | KPTHFTVNA    | 1      | 1          | P21333                   |           | 6,041E6 | 0,037   | 0,2137 | 40       | 0,022378111 | 2   | 1014,53807 | 1,31             | 41,28    |
| 1168 | ASVDKVLLEL   | 1      | 1          | O14979                   |           | 3,984E5 | 0,037   | 0,2102 | 35       | 0,099225335 | 2   | 973,55614  | -0,36            | 105,41   |
| 1169 | TPYKGGNLY    | 1      | 1          | Q13439                   |           | 1,406E7 | 0,037   | 0,2102 | 34       | 0,129828833 | 2   | 1012,51268 | 2,81             | 60,97    |
| 1170 | GVLGTVVHGK   | 1      | 1          | Q9Y6C9                   |           | 1,319E7 | 0,037   | 0,2145 | 29       | 0,155253198 | 2   | 966,57665  | 3,63             | 56,22    |
| 1171 | ALPEKVVNK    | 1      | 1          | Q4LE39                   |           | 5,723E6 | 0,037   | 0,2108 | 29       | 0,168357081 | 2   | 997,60448  | 0,37             | 40,54    |
| 1172 | IYDKFIAQL    | 1      | 1          | Q6P1K2                   |           | 5,041E6 | 0,037   | 0,2123 | 26       | 0,55604141  | 2   | 1110,62212 | 2,44             | 119,58   |
| 1173 | SPFYPGKTTY   | 1      | 1          | P49790                   |           | 1,315E7 | 0,037   | 0,2113 | 26       | 1,256527109 | 2   | 1160,56401 | 1,50             | 79,77    |
| 1174 | VLGQFLVLK    | 1      | 1          | O75531                   |           | 3,007E6 | 0,037   | 0,2127 | 26       | 0,056421844 | 2   | 1016,65221 | 1,85             | 121,52   |
| 1175 | RIRDQLSAVASK | 1      | 1          | Q9P000                   |           | 7,312E6 | 0,037   | 0,2099 | 24       | 0,70296185  | 3   | 1343,77933 | 2,89             | 53,90    |
| 1176 | VYSDLHAFY    | 2      | 1          | Q5VSG8                   |           | 1,665E5 | 0,037   | 0,2084 | 24       | 1,231821161 | 2   | 1114,52031 | -0,08            | 109,52   |
| 1177 | RSAQPLPLKI   | 1      | 1          | Q9UKV3                   |           | 5,422E6 | 0,037   | 0,2087 | 22       | 0,255454267 | 2   | 1122,69963 | 0,20             | 78,49    |
| 1178 | LQRANLLSY    | 1      | 1          | Q15742                   |           | 7,633E6 | 0,037   | 0,2105 | 22       | 1,776199042 | 2   | 1077,60710 | 1,81             | 93,97    |
| 1179 | LPSSEVVKF    | 1      | 1          | Q96CG3                   |           | 5,588E6 | 0,037   | 0,2098 | 20       | 3,336119607 | 2   | 1005,56273 | 1,15             | 93,05    |
| 1180 | ILFPLRFTL    | 1      | 1          | O43156                   |           | 3,833E5 | 0,037   | 0,2137 | 20       | 0,600870051 | 2   | 1119,69255 | 0,02             | 151,65   |
| 1181 | ALWGGTQPLLK  | 1      | 1          | Q8WY98                   |           | 3,499E6 | 0,037   | 0,2088 | 20       | 1,888092032 | 2   | 1183,68791 | 3,79             | 110,66   |
| 1182 | SIFEPAKGGEK  | 1      | 1          | P55265                   |           | 1,865E6 | 0,037   | 0,2085 | 18       | 6,997125852 | 2   | 1162,61101 | 0,58             | 50,30    |
| 1183 | TAAETHYTY    | 1      | 1          | P22415                   |           | 1,464E7 | 0,037   | 0,2135 | 17       | 4,498659974 | 2   | 1056,46550 | 2,11             | 50,88    |

| #    | Sequence     | # PSMs | # Proteins | Protein Group Accessions | Mod. (ox) | Area    | q-Value | PEP    | IonScore | Exp. Value  | Ch. | MH+ [Da]   | ΔM [ppm] | RT [min] |
|------|--------------|--------|------------|--------------------------|-----------|---------|---------|--------|----------|-------------|-----|------------|----------|----------|
| 1184 | GYMEYYLY     | 1      | 1          | Q9NX31                   |           | 2,170E6 | 0,037   | 0,2135 | 17       | 2,287728744 | 2   | 1101,46355 | 3,44     | 76,05    |
| 1185 | LNLPLYFLRY   | 1      | 1          | Q5T4S7                   |           | 9,998E4 | 0,037   | 0,2089 | 16       | 4,912894628 | 2   | 1198,66142 | -0,42    | 146,11   |
| 1186 | LRTALIFGGF   | 1      | 1          | Q8N5G0                   |           | 4,253E5 | 0,037   | 0,2103 | 16       | 4,032950983 | 2   | 1094,63677 | 0,93     | 136,27   |
| 1187 | SLLTSSKGQLQK | 1      | 1          | Q99541                   |           | 3,348E4 | 0,037   | 0,211  | 15       | 5,422150946 | 2   | 1289,74309 | 0,54     | 48,97    |
| 1188 | FPRDPEIEm    | 1      | 1          | P19320                   | M9        | 5,261E6 | 0,037   | 0,2124 | 12       | 16,56812889 | 2   | 1149,52788 | 2,89     | 76,71    |
| 1189 | YLWHIPLSY    | 1      | 1          | Q9UIQ6                   |           | 2,164E6 | 0,037   | 0,2138 | 12       | 28,45870011 | 2   | 1191,62456 | 4,06     | 140,74   |
| 1190 | RPIRQILYL    | 1      | 1          | Q9UBQ5                   |           | 2,633E7 | 0,037   | 0,2106 | 11       | 5,258345169 | 2   | 1171,73503 | 3,42     | 91,00    |
| 1191 | mPVPGHVDEAY  | 1      | 1          | Q9P0T7                   | M1        | 0,000E0 | 0,038   | 0,2181 | 33       | 0,099302409 | 2   | 1230,54473 | -1,04    | 67,66    |
| 1192 | APWKKGLIAV   | 1      | 1          | P16284                   |           | 3,695E6 | 0,038   | 0,215  | 31       | 0,030545666 | 2   | 1082,67388 | 1,60     | 82,37    |
| 1193 | LYDPVISKL    | 1      | 1          | Q96EZ8                   |           | 6,652E4 | 0,038   | 0,2194 | 31       | 0,173978149 | 2   | 1047,60808 | -0,41    | 111,11   |
| 1194 | MVPRLTAVL    | 1      | 1          | Q63HM2                   |           | 8,681E4 | 0,038   | 0,2165 | 30       | 0,128161163 | 2   | 999,60112  | -0,89    | 97,61    |
| 1195 | MLVQALKSGDW  | 1      | 1          | Q9NU22                   |           | 7,258E5 | 0,038   | 0,217  | 28       | 0,802946079 | 2   | 1247,64556 | 0,17     | 114,01   |
| 1196 | SPIDPSEKY    | 1      | 1          | Q6ZRH7                   |           | 1,056E7 | 0,038   | 0,2152 | 26       | 1,163834145 | 2   | 1035,49822 | -1,10    | 64,85    |
| 1197 | KLLDAYLLY    | 1      | 1          | P61803                   |           | 2,448E5 | 0,038   | 0,2183 | 24       | 0,633775724 | 2   | 1111,63921 | -0,53    | 140,15   |
| 1198 | VVMRDPASK    | 1      | 1          | P22626                   |           | 3,719E7 | 0,038   | 0,2193 | 23       | 2,584763033 | 2   | 1002,54503 | 4,88     | 35,68    |
| 1199 | KSTAISLFY    | 1      | 1          | P13639                   |           | 1,912E7 | 0,038   | 0,2156 | 23       | 2,117614111 | 2   | 1029,56365 | 2,03     | 107,25   |
| 1200 | RIFEPSPK     | 1      | 1          | O43143                   |           | 3,374E7 | 0,038   | 0,216  | 23       | 0,890401791 | 2   | 1080,62493 | 4,46     | 56,58    |
| 1201 | RPFKGYEGSL   | 1      | 2          | Q93062;Q6ZRY4            |           | 7,473E6 | 0,038   | 0,2167 | 22       | 2,298206228 | 2   | 1153,60417 | 3,55     | 62,16    |

| #    | Sequence    | # PSMs | # Proteins | Protein Group Accessions | Mod. (ox) | Area    | q-Value | PEP    | IonScore | Exp. Value  | Ch. | MH+ [Da]   | ΔM [ppm] | RT [min] |
|------|-------------|--------|------------|--------------------------|-----------|---------|---------|--------|----------|-------------|-----|------------|----------|----------|
| 1202 | mPSRPSTTPF  | 1      | 1          | P27816                   | M1        | 1,406E6 | 0,038   | 0,2178 | 20       | 3,214804356 | 2   | 1136,53935 | -1,03    | 64,58    |
| 1203 | ATIPNARQF   | 1      | 1          | P42285                   |           | 8,182E6 | 0,038   | 0,2189 | 20       | 2,695968931 | 2   | 1017,55156 | 3,84     | 72,23    |
| 1204 | KTVPVEAVTSK | 1      | 1          | Q14247                   |           | 3,223E6 | 0,038   | 0,2155 | 18       | 3,715248177 | 2   | 1158,67485 | 1,67     | 44,27    |
| 1205 | SQYPNQPTRF  | 1      | 1          | P24468                   |           | 8,895E5 | 0,038   | 0,2174 | 14       | 14,49980706 | 2   | 1237,59636 | 0,26     | 66,05    |
| 1206 | GVLKIQVHY   | 1      | 1          | P52907                   |           | 8,049E6 | 0,038   | 0,2184 | 11       | 7,808214468 | 2   | 1056,62163 | 1,47     | 81,66    |
| 1207 | AVDDRGLYK   | 1      | 2          | P67812;POC7V7            |           | 2,619E6 | 0,039   | 0,2205 | 23       | 1,973870501 | 2   | 1036,54241 | 0,17     | 45,40    |
| 1208 | RPWHPAVVF   | 1      | 1          | Q96G91                   |           | 7,737E6 | 0,039   | 0,2198 | 20       | 3,03005227  | 2   | 1108,60723 | 1,91     | 90,23    |
| 1209 | PQNSDYLLAL  | 1      | 1          | Q99523                   |           | 8,362E5 | 0,04    | 0,2225 | 36       | 0,10252293  | 2   | 1133,58769 | 3,48     | 145,96   |
| 1210 | KPPPPAQEF   | 1      | 1          | Q86X10                   |           | 0,000E0 | 0,04    | 0,2232 | 34       | 0,130137494 | 2   | 1010,53526 | 4,61     | 55,90    |
| 1211 | GVDVTGPHLY  | 1      | 1          | Q99436                   |           | 5,668E6 | 0,04    | 0,2216 | 28       | 0,630558789 | 2   | 1057,53349 | 2,06     | 92,34    |
| 1212 | KPIPLPRF    | 1      | 1          | Q8WV28                   |           | 1,494E7 | 0,04    | 0,2211 | 24       | 0,045953964 | 2   | 967,61046  | 1,71     | 85,84    |
| 1213 | HPIQTQAQY   | 1      | 1          | Q71RC2                   |           | 1,251E7 | 0,04    | 0,2212 | 24       | 1,43319694  | 2   | 1085,53801 | 0,52     | 47,57    |
| 1214 | ALLDSQFSY   | 2      | 1          | O15372                   |           | 5,926E7 | 0,04    | 0,2224 | 22       | 2,334540043 | 2   | 1043,50383 | -0,57    | 140,86   |
| 1215 | KGNSPLLQK   | 1      | 1          | Q9H1I8                   |           | 1,366E7 | 0,041   | 0,2273 | 44       | 0,009630444 | 2   | 984,58385  | 0,15     | 31,70    |
| 1216 | SSSPRNLF    | 1      | 1          | Q9UBF8                   |           | 3,192E6 | 0,041   | 0,2254 | 43       | 0,021999072 | 2   | 964,48509  | 0,40     | 67,99    |
| 1217 | RPYPSPGAVL  | 1      | 1          | O60828                   |           | 6,222E4 | 0,041   | 0,2258 | 34       | 0,108628554 | 2   | 1056,58342 | -0,26    | 83,96    |
| 1218 | LPTENVDKm   | 1      | 1          | Q9Y4C2                   | M9        | 2,550E6 | 0,041   | 0,2265 | 33       | 0,210018972 | 2   | 1062,51494 | 1,22     | 50,91    |
| 1219 | LATRLAPIYK  | 1      | 1          | Q8NFU7                   |           | 7,963E5 | 0,041   | 0,2273 | 25       | 0,266175674 | 2   | 1145,70561 | 1,28     | 86,03    |

| #    | Sequence    | # PSMs | # Proteins | Protein Group Accessions                  | Mod. (ox) | Area    | q-Value | PEP    | IonScore | Exp. Value  | Ch. | MH+ [Da]   | ΔM [ppm] | RT [min] |
|------|-------------|--------|------------|-------------------------------------------|-----------|---------|---------|--------|----------|-------------|-----|------------|----------|----------|
| 1220 | RSDELTRHF   | 1      | 3          | O95600;Q99612;P57682                      |           | 1,136E7 | 0,041   | 0,2282 | 25       | 1,296726923 | 2   | 1160,58330 | 2,20     | 44,65    |
| 1221 | MRYVASYLL   | 1      | 1          | P05387                                    |           | 1,378E5 | 0,041   | 0,2255 | 25       | 1,431442971 | 2   | 1115,59184 | 0,03     | 114,02   |
| 1222 | RALDLLAGFY  | 2      | 1          | Q96RY7                                    |           | 2,499E5 | 0,041   | 0,2284 | 24       | 1,276485302 | 2   | 1138,62529 | -0,25    | 120,02   |
| 1223 | RPQSAISSF   | 1      | 1          | Q5VT06                                    |           | 1,523E6 | 0,041   | 0,2274 | 20       | 4,620912924 | 2   | 992,51506  | -0,96    | 64,57    |
| 1224 | KLHEETLY    | 1      | 1          | Q9NZI6                                    |           | 9,460E6 | 0,041   | 0,2245 | 19       | 6,775183671 | 2   | 1133,58440 | 0,58     | 57,25    |
| 1225 | RSSTYEVRL   | 1      | 1          | P05161                                    |           | 1,996E7 | 0,041   | 0,2262 | 18       | 5,51522276  | 2   | 1110,59343 | 2,88     | 58,92    |
| 1226 | ISKSYIILQ   | 1      | 6          | POCH99;A8MUZ8;POCI00;Q6ZN79;A8MWA4;A8MVS1 |           | 4,460E6 | 0,041   | 0,2284 | 18       | 1,845082288 | 2   | 1064,63750 | 2,30     | 117,48   |
| 1227 | DPNPNFEKF   | 1      | 1          | Q9H8H3                                    |           | 4,648E6 | 0,041   | 0,2247 | 17       | 7,185129009 | 2   | 1107,51433 | 3,37     | 91,70    |
| 1228 | IPVFLEKL    | 1      | 1          | Q14669                                    |           | 2,962E6 | 0,042   | 0,2298 | 23       | 0,600171712 | 2   | 958,59972  | 2,59     | 125,71   |
| 1229 | GVNVRIAVSK  | 1      | 1          | Q8IV08                                    |           | 2,584E6 | 0,042   | 0,2293 | 20       | 1,298726592 | 2   | 1042,63835 | 1,48     | 57,32    |
| 1230 | RYPDLELKY   | 1      | 1          | O75290                                    |           | 3,385E6 | 0,042   | 0,2288 | 13       | 21,00328502 | 2   | 1196,63237 | 1,12     | 92,78    |
| 1231 | MLLRNLALL   | 1      | 1          | O60287                                    |           | 4,939E5 | 0,043   | 0,2334 | 38       | 0,020713174 | 2   | 1056,65605 | -3,60    | 122,26   |
| 1232 | SSNSYAIKK   | 1      | 1          | P46782                                    |           | 9,632E6 | 0,043   | 0,2318 | 33       | 0,193040565 | 2   | 997,53594  | 4,64     | 27,38    |
| 1233 | SLNKQIAQK   | 1      | 1          | Q567U6                                    |           | 3,553E6 | 0,043   | 0,2328 | 32       | 0,201887217 | 2   | 1029,60588 | 0,70     | 28,53    |
| 1234 | VAFKKTFSY   | 1      | 1          | Q99832                                    |           | 5,779E6 | 0,043   | 0,232  | 31       | 0,336496783 | 2   | 1090,59624 | 2,79     | 68,92    |
| 1235 | ALKNTSDFVYL | 1      | 1          | Q12959                                    |           | 0,000E0 | 0,043   | 0,2324 | 24       | 1,718653877 | 2   | 1270,66692 | -0,71    | 139,26   |
| 1236 | GVSSIFIYH   | 1      | 1          | P33076                                    |           | 0,000E0 | 0,043   | 0,233  | 23       | 1,740128025 | 2   | 1022,53343 | 2,79     | 109,27   |
| 1237 | MPSHPDRAY   | 1      | 1          | O75888                                    |           | 1,462E6 | 0,043   | 0,2317 | 23       | 1,058935648 | 2   | 1073,48479 | 1,36     | 40,99    |



| #    | Sequence    | # PSMs | # Proteins | Protein Group Accessions | Mod. (ox) | Area    | q-Value | PEP    | IonScore | Exp. Value  | Ch. | MH+ [Da]   | ΔM [ppm] | RT [min] |
|------|-------------|--------|------------|--------------------------|-----------|---------|---------|--------|----------|-------------|-----|------------|----------|----------|
| 1238 | RPDDRSQGAI  | 1      | 1          | Q04637                   |           | 2,000E7 | 0,043   | 0,2327 | 23       | 1,623094856 | 2   | 1227,64751 | 2,78     | 53,91    |
| 1239 | SIWDETLTK   | 1      | 2          | Q7L523;Q5VZM2            |           | 7,805E4 | 0,043   | 0,233  | 21       | 3,127284487 | 2   | 1154,57341 | 0,49     | 121,92   |
| 1240 | GTQPGPLLKK  | 1      | 1          | Q86UX2                   |           | 2,791E8 | 0,043   | 0,2304 | 21       | 0,750989602 | 2   | 1038,63323 | 2,47     | 41,35    |
| 1241 | GTDELRLLY   | 1      | 1          | Q9Y4W2                   |           | 1,435E7 | 0,043   | 0,2318 | 21       | 3,382216383 | 2   | 1079,57622 | 2,80     | 115,35   |
| 1242 | KQYDSFTYR   | 1      | 1          | Q9Y3Q3                   |           | 3,102E6 | 0,043   | 0,231  | 20       | 3,796522524 | 2   | 1207,57512 | 0,74     | 57,17    |
| 1243 | GLYEFPLNK   | 1      | 1          | Q9UJA5                   |           | 3,613E6 | 0,043   | 0,2309 | 20       | 3,880530713 | 2   | 1080,57536 | 2,69     | 105,89   |
| 1244 | RPKPPSATS   | 1      | 1          | Q9UMS4                   |           | 1,378E7 | 0,043   | 0,2334 | 19       | 2,363727962 | 2   | 1053,60710 | 1,83     | 44,64    |
| 1245 | HPSLGHQVSY  | 1      | 1          | P17947                   |           | 2,187E6 | 0,043   | 0,2305 | 18       | 4,873898444 | 2   | 1124,55071 | 2,09     | 51,92    |
| 1246 | FPWEVPKCLKY | 1      | 1          | P31153                   |           | 3,342E7 | 0,043   | 0,2321 | 18       | 3,072962843 | 3   | 1434,81781 | 2,35     | 96,38    |
| 1247 | HPNPGSITHL  | 1      | 1          | Q93074                   |           | 2,626E6 | 0,043   | 0,233  | 15       | 12,73679009 | 2   | 1072,55425 | 0,74     | 58,06    |
| 1248 | DPVEPHGEm   | 1      | 1          | Q13263                   | M9        | 4,031E6 | 0,043   | 0,2317 | 13       | 6,95698174  | 2   | 1026,41997 | 0,22     | 42,46    |
| 1249 | ALSAALYYL   | 1      | 1          | P56192                   |           | 2,054E6 | 0,043   | 0,2332 | 12       | 19,27903481 | 2   | 984,54045  | 0,38     | 137,29   |
| 1250 | RPVQKLIRL   | 1      | 1          | Q5W0V3                   |           | 3,931E6 | 0,043   | 0,2319 | 11       | 1,126565481 | 2   | 1122,74919 | 1,93     | 58,09    |
| 1251 | GPWSRSLAL   | 1      | 1          | P12830                   |           | 2,469E7 | 0,044   | 0,2388 | 47       | 0,007574324 | 2   | 1073,57707 | 2,98     | 101,91   |
| 1252 | RVLEKDSVTLK | 1      | 1          | P08637                   |           | 7,835E6 | 0,044   | 0,236  | 40       | 0,011372429 | 3   | 1287,76334 | 0,15     | 48,23    |
| 1253 | KPFPFEGEGL  | 1      | 1          | Q9HB58                   |           | 5,076E6 | 0,044   | 0,2352 | 40       | 0,033885    | 2   | 1081,57610 | 4,02     | 140,72   |
| 1254 | VPGPTGLHY   | 1      | 1          | Q8NF64                   |           | 6,914E6 | 0,044   | 0,2387 | 38       | 0,052285419 | 2   | 940,49126  | 2,70     | 77,89    |
| 1255 | RPFEDQTSLS  | 1      | 1          | Q9H7B2                   |           | 1,499E7 | 0,044   | 0,2351 | 33       | 0,236007698 | 2   | 1092,53411 | 1,87     | 75,55    |

| #    | Sequence   | # PSMs | # Proteins | Protein Group Accessions | Mod. (ox) | Area    | q-Value | PEP    | IonScore | Exp. Value  | Ch. | MH+ [Da]   | ΔM [ppm] | RT [min] |
|------|------------|--------|------------|--------------------------|-----------|---------|---------|--------|----------|-------------|-----|------------|----------|----------|
| 1256 | ASTTHDLRL  | 1      | 1          | Q14032                   |           | 3,637E6 | 0,044   | 0,2366 | 32       | 0,245383315 | 2   | 1013,54051 | 3,00     | 51,18    |
| 1257 | LPSRIEVL   | 1      | 1          | Q92738                   |           | 1,271E5 | 0,044   | 0,2355 | 30       | 0,230352152 | 2   | 1013,59899 | -0,04    | 104,28   |
| 1258 | APVFRDYVF  | 1      | 1          | Q9NZK5                   |           | 1,342E7 | 0,044   | 0,2338 | 27       | 0,658365029 | 2   | 1113,57671 | 3,51     | 118,16   |
| 1259 | ALSPSLKNK  | 1      | 1          | Q7Z333                   |           | 8,798E6 | 0,044   | 0,2342 | 27       | 0,652455645 | 2   | 957,57689  | 4,27     | 35,81    |
| 1260 | SPFSSRSPSL | 1      | 1          | P41970                   |           | 3,997E6 | 0,044   | 0,2361 | 26       | 1,130593599 | 2   | 1064,53935 | 2,08     | 75,89    |
| 1261 | mPADTNKAF  | 1      | 1          | Q9P0I2                   | M1        | 2,391E6 | 0,044   | 0,2362 | 26       | 0,88894805  | 2   | 1010,46105 | -0,17    | 45,79    |
| 1262 | AIYGRGIAY  | 1      | 1          | Q8NBP0                   |           | 7,428E6 | 0,044   | 0,2348 | 23       | 0,950723734 | 2   | 983,53307  | 2,18     | 79,79    |
| 1263 | MPSPVSPKL  | 1      | 1          | Q9UHB7                   |           | 7,941E6 | 0,044   | 0,2368 | 23       | 1,209465302 | 2   | 955,52953  | 1,42     | 82,22    |
| 1264 | mAHMASKE   | 1      | 1          | P04406                   | M1        | 1,055E5 | 0,044   | 0,2382 | 22       | 1,167001788 | 2   | 920,39610  | -0,44    | 21,60    |
| 1265 | KLTDGFGSNK | 1      | 1          | Q9NRH2                   |           | 5,178E6 | 0,044   | 0,2352 | 21       | 2,484303726 | 2   | 1156,60344 | 3,19     | 79,40    |
| 1266 | GTSSLFIYK  | 1      | 1          | Q8TAM1                   |           | 1,393E7 | 0,044   | 0,2343 | 20       | 1,83587782  | 2   | 1015,54723 | 1,31     | 92,37    |
| 1267 | QAEEKAHAF  | 1      | 1          | Q15149                   |           | 1,346E7 | 0,044   | 0,2355 | 18       | 4,904752235 | 2   | 1030,49541 | 0,12     | 30,67    |
| 1268 | DAIRNLHHY  | 1      | 2          | Q9BWF3;Q9BQ04            |           | 6,790E6 | 0,044   | 0,2387 | 18       | 6,411194746 | 2   | 1138,57793 | 2,36     | 43,96    |
| 1269 | APIVAHLWEY | 1      | 1          | P50416                   |           | 2,829E6 | 0,044   | 0,2355 | 18       | 5,047078256 | 2   | 1198,62920 | 3,03     | 122,97   |
| 1270 | RLFGISLSY  | 1      | 1          | P51798                   |           | 2,048E6 | 0,044   | 0,235  | 16       | 6,112522533 | 2   | 1055,59050 | 1,95     | 127,63   |
| 1271 | KPFKLSGLSF | 1      | 1          | P49006                   |           | 4,024E6 | 0,044   | 0,2369 | 14       | 6,319487255 | 2   | 1123,65239 | 1,18     | 100,89   |
| 1272 | APASFGKSF  | 1      | 1          | Q96EY5                   |           | 2,792E7 | 0,045   | 0,2399 | 41       | 0,016625133 | 2   | 911,46324  | 1,15     | 70,03    |
| 1273 | VPQPSGRTL  | 1      | 1          | O95644                   |           | 2,398E7 | 0,045   | 0,242  | 40       | 0,029676298 | 2   | 954,53935  | 2,73     | 52,77    |

| #    | Sequence    | # PSMs | # Proteins | Protein Group Accessions | Mod. (ox) | Area    | q-Value | PEP    | IonScore | Exp. Value  | Ch. | MH+ [Da]   | ΔM [ppm] | RT [min] |
|------|-------------|--------|------------|--------------------------|-----------|---------|---------|--------|----------|-------------|-----|------------|----------|----------|
| 1274 | VPQHLVLVL   | 1      | 1          | P12111                   |           | 2,238E7 | 0,045   | 0,2403 | 37       | 0,007955831 | 2   | 1017,64769 | 2,08     | 116,99   |
| 1275 | VVDPVVREK   | 1      | 1          | Q9UKV0                   |           | 2,774E7 | 0,045   | 0,2413 | 36       | 0,034770952 | 2   | 1040,60857 | -1,31    | 43,75    |
| 1276 | LLYGHTVTV   | 1      | 1          | Q8TB61                   |           | 1,197E5 | 0,045   | 0,2411 | 35       | 0,175482321 | 2   | 1002,56151 | -0,37    | 75,50    |
| 1277 | SLADFQIEK   | 1      | 1          | Q9HC98                   |           | 9,689E4 | 0,045   | 0,2411 | 32       | 0,278772516 | 2   | 1050,54619 | -0,44    | 100,60   |
| 1278 | RVSTEVTLAVK | 1      | 1          | Q9NTJ5                   |           | 4,597E6 | 0,045   | 0,2407 | 31       | 0,127114779 | 2   | 1202,71355 | 2,64     | 63,01    |
| 1279 | SPEDIKKAY   | 1      | 3          | O75190;Q7Z6W7;Q8NHS0     |           | 3,234E7 | 0,045   | 0,2399 | 27       | 0,845765478 | 2   | 1050,54643 | -0,20    | 45,48    |
| 1280 | ALVSTPVRTK  | 1      | 1          | O75376                   |           | 5,277E6 | 0,045   | 0,2418 | 23       | 0,864007045 | 2   | 1071,65203 | -0,09    | 50,00    |
| 1281 | MmNEAPGPINF | 1      | 2          | P19105;O14950            | M2        | 1,873E5 | 0,045   | 0,24   | 22       | 1,463829581 | 2   | 1236,53923 | 0,32     | 124,61   |
| 1282 | KPFNPLLGETF | 1      | 1          | P22059                   |           | 4,249E6 | 0,045   | 0,2405 | 20       | 3,881207901 | 2   | 1262,68425 | 4,94     | 125,28   |
| 1283 | QLYDKGLVY   | 1      | 1          | P41252                   |           | 3,156E7 | 0,045   | 0,2418 | 17       | 6,69922801  | 2   | 1098,58513 | 1,93     | 94,39    |
| 1284 | TVIDSQTHY   | 1      | 1          | Q9Y3Q3                   |           | 8,583E6 | 0,045   | 0,2418 | 16       | 11,24957343 | 2   | 1063,50945 | 3,73     | 62,14    |
| 1285 | LPLPSHVSL   | 1      | 1          | P09619                   |           | 1,699E6 | 0,046   | 0,2429 | 36       | 0,045293008 | 2   | 962,56944  | 2,56     | 105,04   |
| 1286 | RLYQAGEGR   | 1      | 1          | P20073                   |           | 4,927E5 | 0,046   | 0,2425 | 26       | 0,963308446 | 2   | 1049,55034 | 1,55     | 30,86    |
| 1287 | RPFSPREAL   | 1      | 1          | Q86V48                   |           | 7,415E6 | 0,046   | 0,2429 | 25       | 0,562833546 | 2   | 1072,59404 | 3,90     | 60,76    |
| 1288 | ATFPLSVQK   | 1      | 1          | P26196                   |           | 2,829E7 | 0,046   | 0,2422 | 22       | 1,891604761 | 2   | 990,56389  | 2,01     | 84,46    |
| 1289 | RPSQPTQET   | 1      | 1          | Q9H3M7                   |           | 2,859E6 | 0,047   | 0,2453 | 36       | 0,08649592  | 2   | 1043,51494 | 3,15     | 26,57    |
| 1290 | GTMTGMLYK   | 1      | 2          | Q5SRD1;O14925            |           | 2,778E5 | 0,047   | 0,2436 | 31       | 0,232059076 | 2   | 1001,47942 | -0,08    | 76,20    |
| 1291 | AmNREVSSLK  | 1      | 1          | P35579                   | M2        | 4,480E6 | 0,047   | 0,2455 | 25       | 1,377584139 | 2   | 1150,59050 | 1,70     | 29,87    |

| #    | Sequence    | # PSMs | # Proteins | Protein Group Accessions                                                     | Mod. (ox) | Area    | q-Value | PEP    | IonScore | Exp. Value  | Ch. | MH+ [Da]   | ΔM [ppm] | RT [min] |
|------|-------------|--------|------------|------------------------------------------------------------------------------|-----------|---------|---------|--------|----------|-------------|-----|------------|----------|----------|
| 1292 | SPSKmPEI    | 1      | 1          | Q15011                                                                       | M5        | 2,530E6 | 0,047   | 0,2448 | 21       | 3,562657314 | 2   | 904,44402  | -0,53    | 41,60    |
| 1293 | KVCNPIITKL  | 1      | 1          | P11142                                                                       |           | 6,505E6 | 0,047   | 0,2446 | 17       | 2,65967971  | 2   | 1128,68205 | 0,95     | 98,36    |
| 1294 | KSFDEQNVPK  | 1      | 1          | O95425                                                                       |           | 3,152E6 | 0,047   | 0,2454 | 15       | 15,53716143 | 2   | 1191,60210 | 1,36     | 43,69    |
| 1295 | YDITNYQSF   | 1      | 1          | P51157                                                                       |           | 8,529E6 | 0,047   | 0,2463 | 14       | 9,02410323  | 2   | 1150,50884 | 3,21     | 94,34    |
| 1296 | TAIREVYQY   | 1      | 1          | O14910                                                                       |           | 3,986E6 | 0,047   | 0,2446 | 11       | 25,50932076 | 2   | 1142,58733 | 2,85     | 77,73    |
| 1297 | RTNEGVIEF   | 1      | 1          | Q13247                                                                       |           | 3,199E7 | 0,048   | 0,2474 | 35       | 0,162786952 | 2   | 1064,54094 | 3,56     | 87,50    |
| 1298 | VmQVADLQSI  | 1      | 1          | P08047                                                                       | M2        | 6,590E4 | 0,048   | 0,2491 | 26       | 1,088830535 | 2   | 1119,57170 | 0,18     | 105,26   |
| 1299 | IILLILIL    | 1      | 1          | Q5TF21;P12830                                                                |           | 9,094E5 | 0,048   | 0,2507 | 26       | 0,020035301 | 2   | 923,68999  | -0,45    | 130,02   |
| 1300 | APLKLQmEF   | 1      | 1          | Q9Y244                                                                       | M7        | 7,080E6 | 0,048   | 0,2492 | 21       | 2,948270652 | 2   | 1092,58049 | 4,24     | 91,18    |
| 1301 | IPFRPSIQF   | 1      | 1          | O00472                                                                       |           | 3,718E6 | 0,048   | 0,2474 | 18       | 4,434498132 | 2   | 1104,62444 | 3,93     | 118,48   |
| 1302 | VPFPRLHFF   | 1      | 11         | Q13885;Q9H4B7;Q9BVA1;P04350;P68371;P07437;Q13509;Q9BUF5;Q3ZCM7;A6NNZ2;A6NKZ8 |           | 5,800E6 | 0,048   | 0,2502 | 17       | 7,814597697 | 2   | 1159,64604 | 4,21     | 125,59   |
| 1303 | RLVNYQISVK  | 1      | 1          | Q15486                                                                       |           | 8,209E6 | 0,048   | 0,2501 | 16       | 2,855228921 | 2   | 1219,71990 | 3,38     | 72,76    |
| 1304 | SIYKPGQTVK  | 1      | 1          | P01023                                                                       |           | 9,387E6 | 0,048   | 0,2498 | 16       | 6,697920812 | 2   | 1120,63762 | 1,34     | 41,07    |
| 1305 | AFGWLSSVLFE | 1      | 1          | P53985                                                                       |           | 2,616E5 | 0,048   | 0,2493 | 14       | 13,43642547 | 2   | 1255,63567 | -0,11    | 109,17   |
| 1306 | SRGCLQNEKQ  | 1      | 1          | Q5VVJ2                                                                       |           | 3,363E6 | 0,048   | 0,2479 | 13       | 18,31970472 | 2   | 1162,56340 | 0,02     | 114,88   |
| 1307 | DANPETHAF   | 1      | 1          | Q99798                                                                       |           | 1,278E7 | 0,048   | 0,2495 | 13       | 8,129322723 | 2   | 1001,43584 | 3,49     | 63,10    |
| 1308 | RGLAAPSNL   | 1      | 1          | Q9P2L0                                                                       |           | 2,940E5 | 0,049   | 0,2539 | 41       | 0,017329677 | 2   | 898,51024  | -0,33    | 68,64    |
| 1309 | LPSDTRLVL   | 1      | 1          | P05155                                                                       |           | 3,061E7 | 0,049   | 0,251  | 32       | 0,154050601 | 2   | 1013,60130 | 2,25     | 101,18   |

| #    | Sequence    | # PSMs | # Proteins | Protein Group Accessions | Mod. (ox) | Area    | q-Value | PEP    | IonScore | Exp. Value  | Ch. | MH+ [Da]   | $\Delta$ M [ppm] | RT [min] |
|------|-------------|--------|------------|--------------------------|-----------|---------|---------|--------|----------|-------------|-----|------------|------------------|----------|
| 1310 | RPPAVTSNGTL | 1      | 1          | O94868                   |           | 7,262E6 | 0,049   | 0,2516 | 31       | 0,255664947 | 2   | 1112,60979 | 3,49             | 58,65    |
| 1311 | KAGEVFIHK   | 1      | 1          | Q15233                   |           | 4,962E4 | 0,049   | 0,2527 | 29       | 0,316936833 | 2   | 1028,58867 | -0,12            | 34,39    |
| 1312 | RLYGDSAAK   | 1      | 1          | Q9NWZ8                   |           | 1,424E6 | 0,049   | 0,252  | 27       | 0,606553388 | 2   | 980,51482  | -1,22            | 29,16    |
| 1313 | KLGGVVSIIK  | 1      | 1          | Q9Y4A5                   |           | 5,794E6 | 0,049   | 0,2538 | 25       | 0,204715747 | 2   | 900,59111  | 3,75             | 54,89    |
| 1314 | ANFQPKVVK   | 1      | 2          | Q9UKX2;P13535            |           | 7,513E7 | 0,049   | 0,2539 | 24       | 0,348109235 | 2   | 1158,70317 | 3,25             | 63,15    |
| 1315 | KSIDFPLTK   | 1      | 1          | O75844                   |           | 1,192E7 | 0,049   | 0,2527 | 23       | 1,012220318 | 2   | 1048,60637 | 2,48             | 75,51    |
| 1316 | LPDTRSEAY   | 1      | 1          | O60563                   |           | 5,240E6 | 0,049   | 0,2535 | 20       | 4,304942334 | 2   | 1051,50969 | 3,98             | 59,89    |
| 1317 | KPLPLKTAL   | 1      | 1          | P32314                   |           | 9,663E6 | 0,049   | 0,2516 | 20       | 0,205131978 | 2   | 980,65026  | -0,08            | 67,32    |
| 1318 | RTAEYFPTK   | 1      | 1          | Q5T4B2                   |           | 1,601E6 | 0,049   | 0,2525 | 17       | 6,802219022 | 2   | 1112,57402 | 0,45             | 50,05    |

### Supplementary Table 18: Expression of source transcripts of vaccine peptides

Whole transcriptome sequencing (WTS) was performed and expression values of the source transcripts of every epitope of the vaccination cocktail were determined for L06/10 and P03/13 using Cufflinks (47). For sample L06/10 the overall read mapping rate is 91.9% and the concordant pair alignment rate 85.2%. For P03/13 it is 91.7% and 86.5%.

Expression values in the following table are shown in FPKM (Fragments per kilobase of exon per million fragments mapped).

| Peptide  | HLA  | Transcript ID | L06/10 | P03/13  |
|----------|------|---------------|--------|---------|
| RGS-5    | A*03 | NM_003617     | 32.23  | 81.06   |
| MMP7-(1) | A*03 | NM_002423     | 141.39 | 1112.53 |
| ADFP-2   | A*03 | NM_001122     | 565.36 | 52.60   |
| ADFP-3   | A*03 | NM_001122     | 565.36 | 52.60   |
| CCND1    | DR   | NM_053056     | 69.69  | 29.62   |
| IGFBP3   | DR   | NM_001013398  | 1.10   | 0.00    |
| MMP7-(2) | DR   | NM_002423     | 141.39 | 1112.53 |

### Supplementary Table 19: Epitope Prediction for vaccine peptides

To test whether peptides of the vaccination cocktail show good affinity to the given HLA alleles, epitope prediction methods netMHCpan (15) and netMHCIIpan (48) and SYFPEITHI (16) were used. All of the MHC class I epitopes are binding to A\*03:01, class II epitopes are binding to DRB1\*0101. Two class II epitopes (IGFBP3, MMP7-(2)) show theoretical affinity to DRB1\*1101 as well. IGFBP3 has additional affinity to DRB3\*0202.

| Peptide ID | Allele    | Peptide                                         | 1-log50k (aff) | Affinity (nM) | SYF |
|------------|-----------|-------------------------------------------------|----------------|---------------|-----|
| RGS-5      | A*03:01   | <b>GLASFKSFLK</b>                               | 0.735          | 17.6          | 21  |
| MMP7-(1)   | A*03:01   | <b>SLFPNSPKWTSK</b>                             | 0.758          | 13.71         | 16  |
|            |           | SLFPNSPKWT<br>PNSPKWTSK                         |                |               |     |
| ADFP-2     | A*03:01   | <b>SLLTSSKGQLQK</b>                             | 0.632          | 53.34         | 17  |
|            |           | SLLTSSKGQL<br>TSSKGQLQK                         |                |               |     |
| ADFP-3     | A*03:01   | <b>TSALPIIQK</b>                                | 0.473          | 298.04        | 15  |
| Core       |           |                                                 |                |               |     |
| CCND1      | DRB1*0101 | <b>NPPSMVAAGSVVAAV</b><br>MVAAGSVVA             | 0.674          | 22.98         | 16  |
| IGFBP3     | DRB1*0101 | <b>HSKIIIIKKGHAKDSQ</b>                         | 0.512          | 109.05        | 25  |
|            |           | HSKIIIIKKGHAKDS<br>SKIIIIKKGHAKDSQ<br>IIIIKKGHA |                |               |     |
|            | DRB1*1101 | IIIIKKGHA                                       | 0.788          | 7.65          |     |
|            | DRB3*0202 | IIIIKKGHA                                       | 0.392          | 345.67        |     |
| MMP7-(2)   | DRB1*0101 | <b>SQDDIKGIQKLYGKRS</b>                         | 0.514          | 107.32        | 15  |
|            |           | QDDIKGIQKLYGKRS<br>IQKLYGKRS                    |                |               |     |
|            | DRB1*1101 | IKGIQKLYG                                       | 0.64           | 31.88         |     |

### Supplementary Table 20: Serum IL-10 concentrations during vaccination

Serum IL-10 concentrations during the course of vaccination were detected by an ultra-sensitive SIMOA assay. Before measurement all samples were diluted 1:10 and measured in duplicates; respective mean values are given for each time point. To convert given sample values to the WHO standard concentrations, given analyte concentrations need to be divided by a factor of 0.77.

| <b>Sample</b><br>[Vaccination time point] | <b>IL-10</b><br>[pg·mL <sup>-1</sup> ] |
|-------------------------------------------|----------------------------------------|
| 1V                                        | 1.74                                   |
| 5V                                        | 1.97                                   |
| 8V                                        | 2.22                                   |
| 10V                                       | 1.46                                   |
| 12V                                       | 1.58                                   |
| 13V                                       | 2.81                                   |
| 15V                                       | 2.50                                   |
| 17V                                       | 4.04                                   |
| 20V                                       | 4.55                                   |
| 21V                                       | 2.93                                   |
| 22V                                       | 2.70                                   |
| 25V                                       | 3.64                                   |
| 28V                                       | 2.22                                   |
| 30V                                       | 2.83                                   |
| 31V                                       | 2.23                                   |



## References

1. Widenmeyer M, Griesemann H, Stevanovic S, Feyerabend S, Klein R, Attig S, et al. Promiscuous survivin peptide induces robust CD4+ T-cell responses in the majority of vaccinated cancer patients. *International journal of cancer Journal international du cancer*. 2012;131:140-9.
2. Altman JD, Moss PA, Goulder PJ, Barouch DH, McHeyzer-Williams MG, Bell JI, et al. Phenotypic analysis of antigen-specific T lymphocytes. *Science*. 1996;274:94-6.
3. Hadrup SR, Maurer D, Laske K, Frosig TM, Andersen SR, Britten CM, et al. Cryopreservation of MHC multimers: Recommendations for quality assurance in detection of antigen specific T cells. *Cytometry Part A : the journal of the International Society for Analytical Cytology*. 2015;87:37-48.
4. Chan-On W, Nairismagi ML, Ong CK, Lim WK, Dima S, Pairojkul C, et al. Exome sequencing identifies distinct mutational patterns in liver fluke-related and non-infection-related bile duct cancers. *Nature genetics*. 2013;45:1474-8.
5. Jiao Y, Pawlik TM, Anders RA, Selaru FM, Streppel MM, Lucas DJ, et al. Exome sequencing identifies frequent inactivating mutations in BAP1, ARID1A and PBRM1 in intrahepatic cholangiocarcinomas. *Nature genetics*. 2013;45:1470-3.
6. Moeini A, Sia D, Bardeesy N, Mazzaferro V, Llovet JM. Molecular Pathogenesis and Targeted Therapies for Intrahepatic Cholangiocarcinoma. *Clinical cancer research : an official journal of the American Association for Cancer Research*. 2016;22:291-300.
7. Ong CK, Subimerb C, Pairojkul C, Wongkham S, Cutcutache I, Yu W, et al. Exome sequencing of liver fluke-associated cholangiocarcinoma. *Nature genetics*. 2012;44:690-3.

8. Li H, Durbin R. Fast and accurate short read alignment with Burrows-Wheeler transform. *Bioinformatics*. 2009;25:1754-60.
9. Faust GG, Hall IM. SAMBLASTER: fast duplicate marking and structural variant read extraction. *Bioinformatics*. 2014;30:2503-5.
10. Saunders CT, Wong WS, Swamy S, Becq J, Murray LJ, Cheetham RK. Strelka: accurate somatic small-variant calling from sequenced tumor-normal sample pairs. *Bioinformatics*. 2012;28:1811-7.
11. Cingolani P, Patel VM, Coon M, Nguyen T, Land SJ, Ruden DM, et al. Using *Drosophila melanogaster* as a Model for Genotoxic Chemical Mutational Studies with a New Program, SnpSift. *Frontiers in genetics*. 2012;3:35.
12. Cingolani P, Platts A, Wang le L, Coon M, Nguyen T, Wang L, et al. A program for annotating and predicting the effects of single nucleotide polymorphisms, SnpEff: SNPs in the genome of *Drosophila melanogaster* strain w1118; iso-2; iso-3. *Fly*. 2012;6:80-92.
13. Liu X, Wu C, Li C, Boerwinkle E. dbNSFP v3.0: A One-Stop Database of Functional Predictions and Annotations for Human Non-synonymous and Splice Site SNVs. *Human mutation*. 2015.
14. Dobin A, Davis CA, Schlesinger F, Drenkow J, Zaleski C, Jha S, et al. STAR: ultrafast universal RNA-seq aligner. *Bioinformatics*. 2013;29:15-21.
15. Lundegaard C, Lamberth K, Harndahl M, Buus S, Lund O, Nielsen M. NetMHC-3.0: accurate web accessible predictions of human, mouse and monkey MHC class I affinities for peptides of length 8-11. *Nucleic acids research*. 2008;36:W509-12.
16. Rammensee H, Bachmann J, Emmerich NP, Bachor OA, Stevanovic S. SYFPEITHI: database for MHC ligands and peptide motifs. *Immunogenetics*. 1999;50:213-9.

17. Kowalewski DJ, Stevanovic S. Biochemical large-scale identification of MHC class I ligands. *Methods in molecular biology*. 2013;960:145-57.
18. Kowalewski DJ, Schuster H, Backert L, Berlin C, Kahn S, Kanz L, et al. HLA ligandome analysis identifies the underlying specificities of spontaneous antileukemia immune responses in chronic lymphocytic leukemia (CLL). *Proceedings of the National Academy of Sciences of the United States of America*. 2015;112:E166-75.
19. Vogelstein B, Papadopoulos N, Velculescu VE, Zhou S, Diaz LA, Jr., Kinzler KW. Cancer genome landscapes. *Science*. 2013;339:1546-58.
20. Prensner JR, Chinnaiyan AM. Metabolism unhinged: IDH mutations in cancer. *Nature medicine*. 2011;17:291-3.
21. Garraway LA, Lander ES. Lessons from the cancer genome. *Cell*. 2013;153:17-37.
22. Greenhough A, Smartt HJ, Moore AE, Roberts HR, Williams AC, Paraskeva C, et al. The COX-2/PGE2 pathway: key roles in the hallmarks of cancer and adaptation to the tumour microenvironment. *Carcinogenesis*. 2009;30:377-86.
23. Lobry C, Oh P, Aifantis I. Oncogenic and tumor suppressor functions of Notch in cancer: it's NOTCH what you think. *The Journal of experimental medicine*. 2011;208:1931-5.
24. Lee SH, Jeong EG, Yoo NJ, Lee SH. Mutational analysis of NOTCH1, 2, 3 and 4 genes in common solid cancers and acute leukemias. *APMIS : acta pathologica, microbiologica, et immunologica Scandinavica*. 2007;115:1357-63.
25. Kiel MJ, Velusamy T, Betz BL, Zhao L, Weigelin HG, Chiang MY, et al. Whole-genome sequencing identifies recurrent somatic NOTCH2 mutations in splenic marginal zone lymphoma. *The Journal of experimental medicine*. 2012;209:1553-65.
26. Wang NJ, Sanborn Z, Arnett KL, Bayston LJ, Liao W, Proby CM, et al. Loss-of-function mutations in Notch receptors in cutaneous and lung squamous cell

carcinoma. Proceedings of the National Academy of Sciences of the United States of America. 2011;108:17761-6.

27. Backer JM. The regulation of class IA PI 3-kinases by inter-subunit interactions. Current topics in microbiology and immunology. 2010;346:87-114.
28. Cheung LW, Hennessy BT, Li J, Yu S, Myers AP, Djordjevic B, et al. High frequency of PIK3R1 and PIK3R2 mutations in endometrial cancer elucidates a novel mechanism for regulation of PTEN protein stability. Cancer discovery. 2011;1:170-85.
29. Cheung LW, Yu S, Zhang D, Li J, Ng PK, Panupinthu N, et al. Naturally occurring neomorphic PIK3R1 mutations activate the MAPK pathway, dictating therapeutic response to MAPK pathway inhibitors. Cancer cell. 2014;26:479-94.
30. Lui VW, Hedberg ML, Li H, Vangara BS, Pendleton K, Zeng Y, et al. Frequent mutation of the PI3K pathway in head and neck cancer defines predictive biomarkers. Cancer discovery. 2013;3:761-9.
31. Grossmann KS, Rosario M, Birchmeier C, Birchmeier W. The tyrosine phosphatase Shp2 in development and cancer. Advances in cancer research. 2010;106:53-89.
32. Bard-Chapeau EA, Li S, Ding J, Zhang SS, Zhu HH, Princen F, et al. Ptpn11/Shp2 acts as a tumor suppressor in hepatocellular carcinogenesis. Cancer cell. 2011;19:629-39.
33. Irving J, Matheson E, Minto L, Blair H, Case M, Halsey C, et al. Ras pathway mutations are prevalent in relapsed childhood acute lymphoblastic leukemia and confer sensitivity to MEK inhibition. Blood. 2014;124:3420-30.
34. Goodwin CB, Li XJ, Mali RS, Chan G, Kang M, Liu Z, et al. PI3K p110delta uniquely promotes gain-of-function Shp2-induced GM-CSF hypersensitivity in a model of JMML. Blood. 2014;123:2838-42.

35. Goodwin CB, Yang Z, Yin F, Yu M, Chan RJ. Genetic disruption of the PI3K regulatory subunits, p85alpha, p55alpha, and p50alpha, normalizes mutant PTPN11-induced hypersensitivity to GM-CSF. *Haematologica*. 2012;97:1042-7.
36. Zhang SQ, Tsiaras WG, Araki T, Wen G, Minichiello L, Klein R, et al. Receptor-specific regulation of phosphatidylinositol 3'-kinase activation by the protein tyrosine phosphatase Shp2. *Molecular and cellular biology*. 2002;22:4062-72.
37. Cunnick JM, Meng S, Ren Y, Desponts C, Wang HG, Djeu JY, et al. Regulation of the mitogen-activated protein kinase signaling pathway by SHP2. *The Journal of biological chemistry*. 2002;277:9498-504.
38. Neel BG, Gu H, Pao L. The 'Shp'ing news: SH2 domain-containing tyrosine phosphatases in cell signaling. *Trends in biochemical sciences*. 2003;28:284-93.
39. Ramadoss S, Chen X, Wang CY. Histone demethylase KDM6B promotes epithelial-mesenchymal transition. *The Journal of biological chemistry*. 2012;287:44508-17.
40. Yamamoto K, Tateishi K, Kudo Y, Sato T, Yamamoto S, Miyabayashi K, et al. Loss of histone demethylase KDM6B enhances aggressiveness of pancreatic cancer through downregulation of C/EBPalpha. *Carcinogenesis*. 2014;35:2404-14.
41. Williams K, Christensen J, Rappsilber J, Nielsen AL, Johansen JV, Helin K. The histone lysine demethylase JMJD3/KDM6B is recruited to p53 bound promoters and enhancer elements in a p53 dependent manner. *PloS one*. 2014;9:e96545.
42. Hoof I, Peters B, Sidney J, Pedersen LE, Sette A, Lund O, et al. NetMHCpan, a method for MHC class I binding prediction beyond humans. *Immunogenetics*. 2009;61:1-13.
43. Nielsen M, Lundegaard C, Blicher T, Lamberth K, Harndahl M, Justesen S, et al. NetMHCpan, a method for quantitative predictions of peptide binding to any HLA-A and -B locus protein of known sequence. *PloS one*. 2007;2:e796.

44. Buus S, Lauemoller SL, Worning P, Kesmir C, Frimurer T, Corbet S, et al. Sensitive quantitative predictions of peptide-MHC binding by a 'Query by Committee' artificial neural network approach. *Tissue antigens*. 2003;62:378-84.
45. Lundegaard C, Lund O, Nielsen M. Accurate approximation method for prediction of class I MHC affinities for peptides of length 8, 10 and 11 using prediction tools trained on 9mers. *Bioinformatics*. 2008;24:1397-8.
46. Nielsen M, Lundegaard C, Worning P, Lauemoller SL, Lamberth K, Buus S, et al. Reliable prediction of T-cell epitopes using neural networks with novel sequence representations. *Protein science : a publication of the Protein Society*. 2003;12:1007-17.
47. Trapnell C, Williams BA, Pertea G, Mortazavi A, Kwan G, van Baren MJ, et al. Transcript assembly and quantification by RNA-Seq reveals unannotated transcripts and isoform switching during cell differentiation. *Nature biotechnology*. 2010;28:511-5.
48. Nielsen M, Justesen S, Lund O, Lundegaard C, Buus S. NetMHCIIpan-2.0 - Improved pan-specific HLA-DR predictions using a novel concurrent alignment and weight optimization training procedure. *Immunome research*. 2010;6:9.
